# Supplementary material for: Comparative Physiological and Transcriptomic Analyses Reveal Altered Fe-Deficiency Responses in Tomato Epimutant Colorless Non-ripening
Source: Front Plant Sci. 2022 Jan 21;12:796893. doi: 10.3389/fpls.2021.796893 (PMC8813752; doi:10.3389/fpls.2021.796893)
Supplement: Supplementary file 7 [file Table_1.xlsx]

## Sheet: Sheet1
Table S1. List of oligonucleotide primers used in this study.
Primers	Sequences(5'--3')	Gene locus	Purposes
SlSPL-CNR-BsF	ATATATGGTCTCGATTGTCGGCACATCCTTCTTGCCGTT	Solyc02g077920	Construction of SlSPL-CNR Knockout Vector
SlSPL-CNR-F0	TGTCGGCACATCCTTCTTGCCGTTTTAGAGCTAGAAATAGC
SlSPL-CNR-R0	AACCTATACAACTCGGAAGGCACAATCTCTTAGTCGACTCTAC
SlSPL-CNR-BsR	ATTATTGGTCTCGAAACCTATACAACTCGGAAGGCAC
SlSPL-CNR-F	CTCTTTTATCTGGCTTCCTCACTC	Solyc02g077920	Identification of CRISPR/Cas9 edited sites on SlSPL-CNR
SlSPL-CNR-R	GCCTGTGTTATTGGTATTGGTTC
ACTIN-F	AGGCAGGATTTGCTGGTGATGATGCT	Solyc03g078400	RT-qPCR analysis
ACTIN-R	ATACGCATCCTTCTGTCCCATTCCGA
SlIRT1;1-F	ACATTTGCTCTAATACAGGCGG	Solyc02g069190
SlIRT1;1-R	CGCCCGTGGACTATTTTCCT
SlbHLH066-F	CCCATGGAACCTCTTCATTCATC	Solyc10g079650
SlbHLH066-R	GTTGATGATGATCACCACCGTTG
SlPIN5-F	TATACAAGGTGGTGGTTGGGATG	Solyc01g068410
SlPIN5-R	TACGTCTCCCGACAGAAAAAGG
SlS8H-F	GCCCTAATCCAGAGCTAACAGTA	Solyc11g045520
SlS8H-R	GAATGGGAGGAATCTCAATCCAC
SlRF38-F	GTGTGGATCCTTGGCTTATGTTG	Solyc10g081780
SlRF38-R	CCTAGAAGCCAAAGGAACAACC
SlIRT1;2-F	ATTCCTACTCAAAATTCAAA	Solyc02g069200
SlIRT1;2-R	ACAAACTCCGATCATACTAG
OFF1-F	GTTTCTGTTTTTCGCCCGTG	Solyc02g090010	Off-target effects assay
OFF1-R	GTGGTGGATTCGGCTGTGTA
OFF2-F	CTTTCTTTGCCCGCTTTTTA	Solyc08g061820
OFF2-R	CGAGCATCCTCCTATCCTGA
OFF3-F	GAGCAATACATACAGAACCTCC	Solyc09g030370
OFF3-R	ACACGATGTTGCTTCCTAAAAG
OFF4-F	TTTGATGATTGTGGTCTGCC	Solyc11g008720
OFF4-R	CTCTACAAAAGCCACTAAATCC
OFF5-F	TATGGAGGTGGTGATGCTTC	Solyc03g115890
OFF5-R	ACCACCCACCAGCGTTATTC
OFF6-F	CGGGATAAACCCTACGACTG	Solyc06g054590
OFF6-R	CGTCACATGGCAACAACTTTAC
OFF7-F	TGACTGGAGGATGGGTTTTC	Solyc01g090940
OFF7-R	GCCCAAGCAGTCCAGATAAC
OFF8-F	GAATGCCTGCTACCCTGAAGTG	Solyc07g047860
OFF8-R	GTGATGAACCTTAGGGACCGC
OFF9-F	CTCCATCCCTATCATTTTCGTA	Solyc02g062600
OFF9-R	CCTCTCTTCGACTTTGCTCG
SlSPL-CNR-BF1	TTATAAATTTAAGTTTTATTTTGTTT	Solyc02g077920 (-3097bp to -2543bp from ATG codon)	Targeted-bisulfite sequencing assay
SlSPL-CNR-BR1	TTCTTATTACTATTATTCTTATAAATATCA
SlSPL-CNR-BF2	TTTTAAGTTGTTATAGAGATATTGGAAGAG	Solyc02g077920 (-2764bp to -2185bp from ATG codon)
SlSPL-CNR-BR2	TTTAAAATTTTATATCTTATTAAAATAAAT
SlSPL-CNR-BF3	TGTTTAGTTATATTATATGATTTAAAAGGT	Solyc02g077920 (-2404bp to -1828bp from ATG codon)
SlSPL-CNR-BR3	TAACAAAAAAACTCCATAATTAAAA
SlSPL-CNR-BF4	GGGATTTATTATGTATTATGTTTTTTAAAA	Solyc02g077920 (-1973bp to -1438bp from ATG codon)
SlSPL-CNR-BR4	TAATTCCCCAAAATAACCTTATTTATATAT
SlSPL-CNR-BF5	AGTTATTTATTTTAATTTGTTTTTGTTTAT	Solyc02g077920 (-1600bp to -1050bp from ATG codon)
SlSPL-CNR-BR5	CCCCTACTTAATAATCCTTTTCAAAC
SlSPL-CNR-BF6	AGATTTATTGAATTATGTAATTTTATAT	Solyc02g077920 (-1161bp to -595bp from ATG codon)
SlSPL-CNR-BR6	ATAAATTACTCACTCTTTTCCTCTAACTTT
SlSPL-CNR-BF7	AATGTATATTTTTATTATAAGTGAAAA	Solyc02g077920 (-684bp to -178bp from ATG codon)
SlSPL-CNR-BR7	AAACTAAAAATTCTAATTAATATTCC
SlSPL-CNR-BF8	TTTTTTTGTATTAAAGTTAGTTTATGTTAA	Solyc02g077920 (-298bp to +232bp from ATG codon)
SlSPL-CNR-BR8	AAATAAAACTCACACACCTTATAAC
SlSPL-CNR-BF9	AAAGGGTATTGATTTTTTTTGGTAG	Solyc02g077920 (+94bp to +645bp from ATG codon)
SlSPL-CNR-BR9	AACTCACTTTTACTTTTTCACAATTTATAA
SlSPL-CNR-BF10	TGTGTAATATATGGGAATTTTAATAT	Solyc02g077920 (+483bp to +1353bp from ATG codon)
SlSPL-CNR-BR10	ACAAATAAAATCTACACCTCATCATAC
SlSPL-CNR-BF11	TTAATGAGTAGGGGTAAAATAGAGTT	Solyc02g077920 (+1277bp to +1751bp from ATG codon)
SlSPL-CNR-BR11	AATAATAAAAACCTCATAAAATAAATT
SlIRT1;1-BF1	ATTAGTGTTAATTTTGAAGGGTAAAGGA	Solyc02g069190 (-2000bp to -1403bp from ATG codon)
SlIRT1;1-BR1	CTTATATTAACATCATCTCTCAAATT
SlIRT1;1-BF2	ATTTTAAAGATGGTTTTTTATTATTTGT	Solyc02g069190 (-1441bp to -830bp from ATG codon)
SlIRT1;1-BR2	TATTCATATAATTTTTATATATCTTATC
SlIRT1;1-BF3	TGAAATTTTTAAGATTTTTTTGAATGAAAA	Solyc02g069190 (-906bp to -69bp from ATG codon)
SlIRT1;1-BR3	CATAAAAAATATAATATATATACACACT
SlIRT1;1-BF4	GATTTGTTTTTAATTAATTAATTTAAATG	Solyc02g069190 (-159bp to +676bp from ATG codon)
SlIRT1;1-BR4	ATCATTTATACTACCTAATTAATATCCT
SlIRT1;1-BF5	TGATATAGAGTTATTGTTATGGTTAG	Solyc02g069190 (+608bp to +1473bp from ATG codon)
SlIRT1;1-BR5	TCAATATAAATAAACCAATTAATTAACC
SlIRT1;1-BF6	TGTTTTATTATAGTTGATTTGTTTATGTA	Solyc02g069190 (+1352bp to +2242bp from ATG codon)
SlIRT1;1-BR6	AAAAAAAATACATAACAATTCAAA
SlbHLH066-BF1	TTTAAAGGGTTAGGGTGGGTTGGTT	Solyc10g079650 (-2000bp to -1126bp from ATG codon)
SlbHLH066-BR1	AATTAAAACAACCATTAAATCAACTACC
SlbHLH066-BF2	ATGAAAGTGTGTTTATTAATAT	Solyc10g079650 (-1215bp to -101bp from ATG codon)
SlbHLH066-BR2	AACACAACTCATAATAATAATTACTCTA
SlbHLH066-BF3	AGGATTAAATGTGTAATTATTTTGAAT	Solyc10g079650 (-173bp to +469bp from ATG codon)
SlbHLH066-BR3	TAAAATCTCATAAACATATAACA
SlbHLH066-BF4	ATGTTTGATTTATTAATTTGGAAAA	Solyc10g079650 (+440bp to +979bp from ATG codon)
SlbHLH066-BR4	ACATATATAATCCTATAAATAAAATCCA
SlbHLH066-BF5	TGTTAGTTGTTGTATTTGTTTTGTATT	Solyc10g079650 (+881bp to +2040bp from ATG codon)
SlbHLH066-BR5	TTATAACTTATCTTCCTTCTCAAAAT
SlPIN5-BF1	ATTTTTTTAAAAATTATTTTTGATGGA	Solyc01g068410 (-2000bp to -1333bp from ATG codon)
SlPIN5-BR1	ATTATCTTTATCCTCCTCCTTAATCA
SlPIN5-BF2	TGTGATTTATTTTATTATTTTATGTTA	Solyc01g068410 (-1415bp to -410bp from ATG codon)
SlPIN5-BR2	CCTAAATTCAAACCAAACACTCTTCTAA
SlPIN5-BF3	TGATTTGATTGATTTATAAATTTGTTTA	Solyc01g068410 (-523bp to +239bp from ATG codon)
SlPIN5-BR3	ACTTTAACAATTACATCTCCCAACAA
SlPIN5-BF4	ATAGTTAAAATTAATTTTTATAATT	Solyc01g068410 (+175bp to +924bp from ATG codon)
SlPIN5-BR4	ACATTAATATCACACCTATTATTTCTC
SlPIN5-BF5	TGTGTAGTGAAAGATATGTAAATAAGGA	Solyc01g068410 (+819bp to +1991bp from ATG codon)
SlPIN5-BR5	ACAATTATTTTCCCACACAAAACCATA
SlPIN5-BF6	AAGGTTAATTAATGTTATTATTTTTA	Solyc01g068410 (+1917bp to +2938bp from ATG codon)
SlPIN5-BR6	TTAAAATAACAAAAATCTTATTT
SlS8H-BF1	ATTTATTAAGTAAGTTTGATTTTTAGG	Solyc11g045520 (-2000bp to -995bp from ATG codon)
SlS8H-BR1	TCAAAACAAACAATATATATATAATAAC
SlS8H-BF2	AGTGTGATTTTTTTTTGTGTTATTA	Solyc11g045520 (-1096bp to -214bp from ATG codon)
SlS8H-BR2	TCTTTAATTCTTTATCCTAACCCTTAC
SlS8H-BF3	GTTTTATTGGAGTTTTGGATATTTAAAT	Solyc11g045520 (-312bp to +600bp from ATG codon)
SlS8H-BR3	ATACTAAATATATAACCTTCCAT
SlS8H-BF4	AATGTAAGTAGGAATTTTTTTTAAT	Solyc11g045520 (+515bp to +1287bp from ATG codon)
SlS8H-BR4	CTTCAAATATTCAAAAACCACATCCCT
SlS8H-BF5	TGTTAGTTATTAAATATAGAAAAAAAA	Solyc11g045520 (+1213bp to +2111bp from ATG codon)
SlS8H-BR5	TTAAACAAAATCATCATTCTAAACA
SlRF38-BF1	TTGAATGTATGATAATGTATTTTTATA	Solyc10g081780 (-2000bp to -1098bp from ATG codon)
SlRF38-BR1	TTAAAAATAAAATATTCTCATTAACAC
SlRF38-BF2	GTTAAAGTTAATAATGTATATATTAAGT	Solyc10g081780 (-1203bp to -124bp from ATG codon)
SlRF38-BR2	TTTAAAAATCAATAACTTACATAT
SlRF38-BF3	AAGTATGAAATGAAGTAAAAAGTGTTAGTA	Solyc10g081780 (-350bp to +510bp from ATG codon)
SlRF38-BR3	TTACTATAACATCAATCCCAAAAACCT
SlIRT1;2-BF1	ATAATTATAATTGATTAAATTGAAGTG	Solyc02g069200 (-2000bp to -1072bp from ATG codon)
SlIRT1;2-BR1	CTTCAAATTATATCACCACCTAATCT
SlIRT1;2-BF2	TGTTATTAAGAAGTTTGTTAAGTTAAG	Solyc02g069200 (-1125bp to -112bp from ATG codon)
SlIRT1;2-BR2	CTAAATTTTAATATTCCATATACTAAC
SlIRT1;2-BF3	GTTATGTTTGATAATGTATTTTATATATTG	Solyc02g069200 (-177bp to +504bp from ATG codon)
SlIRT1;2-BR3	TCCAACCACAACCATTTCTTAATCACCT
SlIRT1;2-BF4	AAGGAGTATTTGTGGTATAAATTTT	Solyc02g069200 (+367bp to +1250bp from ATG codon)
SlIRT1;2-BR4	GGAATGTTAGTTATGGTTATTTGGGTTTAA
