# Supplementary material for: Comparative Physiological and Transcriptomic Analyses Reveal Altered Fe-Deficiency Responses in Tomato Epimutant Colorless Non-ripening
Source: Front Plant Sci. 2022 Jan 21;12:796893. doi: 10.3389/fpls.2021.796893 (PMC8813752; doi:10.3389/fpls.2021.796893)
Supplement: Supplementary file 8 [file Table_2.xlsx]

## Sheet: Sheet1
Table S2. Summary of DNA methylation changes in the promotor and gene body region of 6 selected genes in AC and Cnr roots under Fe-sufficient condition for 3 d.
Gene ID	Gene annotation	region	start	end	length	Cnr+Fe_meanMethy	AC+Fe_meanMethy	diff.Methy	C context	Cnr+Fe FPKM	AC+Fe FPKM	log2FoldChange
Solyc01g080230.2	Dienelactone hydrolase family protein	intron	79441650	79441792	143	0.206504	0.33585	-0.129346	CHH	17.09	7.076	1.29814
Solyc02g069190.2	SlIRT1;1	promoter	39154646	39154760	115	0.282118	0.0987069	0.183412	CHH	134.75	41.95	1.71641
Solyc07g014680.2	Na+ transporter	intron	5096522	5096620	99	0.0571815	0.160522	-0.10334	CHH	2.276	0.896	1.27011
Solyc10g079230.1	CM0545.450.nc protein	exon	60806384	60806495	112	0.774496	0.489694	0.284802	CG	3.013	1.43	1.06442
Solyc10g079660.1	SlbHLH067	promoter	61155241	61155380	140	0.933144	0.50261	0.430534	CG	9.87	0.096	5.31255
Solyc11g005840.1	Cysteine desulfurase	intron	674610	674682	73	0.13648	0.629796	-0.493316	CG	92.856	24.163	1.98992
Solyc11g005840.1	Cysteine desulfurase	exon	674610	674682	73	0.13648	0.629796	-0.493316	CG	92.856	24.163	1.98992
Solyc11g018530.1	SlNramp3	intron	8643310	8643372	63	0.92228	0.455238	0.467042	CG	71.946	17.973	2.04356
Solyc11g018530.1	SlNramp3	exon	8643310	8643372	63	0.92228	0.455238	0.467042	CG	71.946	17.973	2.04356
Solyc12g088970.1	CYP82C4	exon	64146024	64146074	51	0.652957	0.271208	0.381749	CG	17.423	0.533	2.86306
