# Supplementary material for: Comparative Physiological and Transcriptomic Analyses Reveal Altered Fe-Deficiency Responses in Tomato Epimutant Colorless Non-ripening
Source: Front Plant Sci. 2022 Jan 21;12:796893. doi: 10.3389/fpls.2021.796893 (PMC8813752; doi:10.3389/fpls.2021.796893)
Supplement: Supplementary file 9 [file Table_3.xlsx]

## Sheet: Sheet1
Table S3. Mutation analysis on the putative off-target sites in SlSPL-CNR KO lines.
Target	Putative off-target	Genome-wide off-target locus	Sequence of off-target site	Gene/region	Mutation plants No.
	OFF1	SL2.50ch02 :-51689499	GTGGGTGCATGCTTCTTGCCCGG	Solyc02g090010 (CDS)	0
sgRNA1	OFF2	SL2.50ch08: +49555219	GTTTGCATATCCTTCGTGCCAAG	Solyc08g061820 (intron)	0
	OFF3	SL2.50ch09: -31942534	GTCGGAACATGCTTGTTGCTGGG	Solyc09g030370 (CDS)	0
	OFF4	SL2.50ch11: +2896162	GTATATTCCGACTTGTATAGAGG	Solyc11g008720 (intron)	0
	OFF5	SL2.50ch03: +65488060	GTGCCTTCCAGGCTCTATAGTGG	Solyc03g115890 (CDS)	0
sgRNA2	OFF6	SL2.50ch06: +37322667	GTGCTTTCCAAGTAGTATTGTAG	Solyc06g054590 (intron)	0
	OFF7	SL2.50ch01: -84632595	GTGTCTTCCGAGGTTTAAAGTGG	Solyc01g090940 (intron)	0
	OFF8	SL2.50ch07: +59089773	GTTCATTCCGAGTTGCAGAGTAG	Solyc07g047860 (CDS)	0
	OFF9	SL2.50ch02: +34319975	GTGCCTTCAGACTTCTATGGTAG	Solyc02g062600 (intron)	0
The mismatched bases are indicated in red, and PAM is high-lighted in green.
