# Supplementary material for: Comparative Physiological and Transcriptomic Analyses Reveal Altered Fe-Deficiency Responses in Tomato Epimutant Colorless Non-ripening
Source: Front Plant Sci. 2022 Jan 21;12:796893. doi: 10.3389/fpls.2021.796893 (PMC8813752; doi:10.3389/fpls.2021.796893)
Supplement: Supplementary file 10 [file Table_4.xlsx]

## Sheet: Table S3
Table S4. Summary of RNA-Sequencing of tomato roots subjected to Fe sufficient or Fe deficient nutrient solution for 3 d.
Samples	Total raw reads (Mb)	Total clean reads (Mb)	Total clean bases (Gb)	Clean reads ratio (%)	Genome mapping ratio (%)	Gene mapping ratio (%)
AC+Fe 1	49.08	42.06	6.31	85.69	92.21	78.26
AC+Fe 2	50.83	43.38	6.51	85.34	93.42	79.42
AC+Fe 3	49.08	42.21	6.33	86	92.95	78.9
AC-Fe 1	50.83	42.74	6.41	84.07	91.87	77.66
AC-Fe 2	49.08	42.86	6.43	87.32	92.31	78.36
AC-Fe 3	49.08	43.08	6.46	87.78	92.49	78.38
Cnr+Fe 1	47.33	42.87	6.43	90.58	91.05	77.3
Cnr+Fe 2	47.33	43.26	6.49	91.4	91.67	77.21
Cnr+Fe 3	47.33	42.35	6.35	89.48	91.29	76.97
Cnr-Fe 1	47.33	43.1	6.46	91.06	89.95	76.57
Cnr-Fe 2	45.57	42.36	6.35	92.94	89.74	76.48
Cnr-Fe 3	47.33	43.12	6.47	91.12	88.55	75.48
