# Supplementary material for: Comparative Physiological and Transcriptomic Analyses Reveal Altered Fe-Deficiency Responses in Tomato Epimutant Colorless Non-ripening
Source: Front Plant Sci. 2022 Jan 21;12:796893. doi: 10.3389/fpls.2021.796893 (PMC8813752; doi:10.3389/fpls.2021.796893)
Supplement: Supplementary file 11 [file Table_5.xlsx]

## Sheet: Up-regulated DEGs in AC roots
Table S5. Up-regulated DEGs in AC roots under Fe deficiency condition.
Gene ID	WT+Fe FPKM	WT-Fe FPKM	Log2 (WT-Fe/WT+Fe)	Qvalue (WT+Fe-vs-WT-Fe)	Pvalue (WT+Fe-vs-WT-Fe)	Nr
Solyc01g005900.2	1.216	177.073	6.8006	3.4415e-118	2.0767e-121	XP_004228929.1|1.4e-99|fatty alcohol:caffeoyl-CoA acyltransferase-like [Solanum lycopersicum]
Solyc10g079660.1	0.096	46.653	6.74797	4.76412e-103	4.21637e-106	PHU16147.1|2.7e-176|hypothetical protein BC332_17352 [Capsicum chinense]
Solyc02g069200.1	2.326	539.316	6.7297	2.04299e-113	1.47936e-116	NP_001234248.1|1.9e-194|iron-regulated transporter 1 precursor [Solanum lycopersicum]
Solyc03g006720.1	0.063	16.19	6.71802	4.47912e-114	3.0632e-117	XP_015067989.1|0.0e+00|G-type lectin S-receptor-like serine/threonine-protein kinase SD1-29 isoform X1 [Solanum pennellii]
Solyc11g045520.1	9.55	997.516	6.63422	0	0	XP_004250780.1|2.3e-211|feruloyl CoA ortho-hydroxylase 1 [Solanum lycopersicum]
Solyc12g017350.1	1.893	200.123	6.48979	0	0	XP_009597251.2|5.6e-166|PREDICTED: metal tolerance protein 9-like [Nicotiana tomentosiformis]
BGI_novel_G000586	0.043	12.186	5.6845	3.79365e-63	6.56236e-66
Solyc10g005550.1	0.1	28.93	5.68347	4.18265e-62	7.40351e-65	XP_010327227.1|1.4e-143|transcription factor MYB58 [Solanum lycopersicum]
Solyc12g011060.1	0.073	33.8	5.68169	5.68923e-65	8.46815e-68	XP_010314042.2|3.0e-86|zinc finger Ran-binding domain-containing protein 2-like [Solanum lycopersicum]
Solyc11g018530.1	17.973	620.27	5.07224	0	0	XP_006351140.1|6.7e-297|PREDICTED: metal transporter Nramp5-like [Solanum tuberosum]
Solyc12g017340.1	0.15	54.496	4.96927	3.03769e-40	8.79854e-43	XP_004251958.1|2.0e-31|metal tolerance protein 9 [Solanum lycopersicum]
Solyc07g045160.2	1.316	41.503	4.77003	6.59821e-165	2.9198e-168	XP_004243600.1|2.3e-298|ATP-dependent 6-phosphofructokinase 6 isoform X1 [Solanum lycopersicum]
Solyc10g079680.1	0.136	18.193	4.71824	7.9043e-38	2.51203e-40	XP_004249750.2|5.4e-103|transcription factor bHLH100 [Solanum lycopersicum]
Solyc12g100300.1	1.686	39.566	4.33266	6.38292e-113	4.87873e-116	XP_004253139.1|6.3e-223|metal tolerance protein 4-like [Solanum lycopersicum]
Solyc05g055050.1	0.093	4.92	4.18854	7.59784e-30	3.0565e-32	XP_015163564.1|4.0e-96|PREDICTED: phosphoenolpyruvate carboxylase kinase 2 isoform X1 [Solanum tuberosum]
Solyc06g054310.1	0.336	12.273	4.09673	1.00086e-33	3.58343e-36	XP_010322261.1|3.6e-150|protein FANTASTIC FOUR 3-like [Solanum lycopersicum]
Solyc01g080230.2	7.076	125.736	4.0892	8.35224e-239	2.35199e-242	XP_025886743.1|9.9e-143|endo-1,3;1,4-beta-D-glucanase [Solanum lycopersicum]
Solyc01g111340.2	0.19	5.62	4.08815	1.69508e-39	5.0461e-42	XP_015070219.1|0.0e+00|endo-1,4-beta-xylanase 5 isoform X1 [Solanum pennellii]
Solyc12g088210.1	0	1.72	3.97393	6.66853e-21	4.02397e-23	XP_004252731.1|0.0e+00|uncharacterized protein LOC101253570 isoform X1 [Solanum lycopersicum]
Solyc07g049560.2	6.64	104.856	3.90845	7.70669e-268	1.55014e-271	XP_015080323.1|9.4e-132|tyrosine-protein phosphatase DSP1 [Solanum pennellii]
Solyc10g079650.1	1.33	25.29	3.86239	4.88438e-53	1.02176e-55	XP_004249748.1|4.4e-137|transcription factor bHLH100-like [Solanum lycopersicum]
Solyc10g081780.1	0.73	19.736	3.80614	1.49101e-29	6.05807e-32	XP_015055251.1|1.5e-88|RING-H2 finger protein ATL70-like [Solanum pennellii]
Solyc02g065090.2	1.356	22.293	3.78716	2.53635e-68	3.46914e-71	XP_004233432.1|1.2e-234|patatin-like protein 1 [Solanum lycopersicum]
Solyc12g008440.1	2.246	49.58	3.75236	4.05189e-33	1.46701e-35	XP_025884451.1|7.0e-57|E3 ubiquitin-protein ligase RDUF1-like [Solanum lycopersicum]
Solyc02g069190.2	41.95	624.703	3.7113	2.81391e-79	3.16958e-82	NP_001234252.1|8.8e-196|iron-regulated transporter 2 precursor [Solanum lycopersicum]
Solyc06g066710.1	2.116	46.553	3.70042	1.41075e-30	5.50499e-33	OIS96555.1|5.4e-41|hypothetical protein A4A49_08815 [Nicotiana attenuata]
Solyc01g107780.2	8.213	102.89	3.61801	3.26753e-272	5.25792e-276	XP_004230753.1|1.3e-284|scopoletin glucosyltransferase-like [Solanum lycopersicum]
Solyc01g094910.2	0.83	545.98	3.52526	1.24315e-14	1.13523e-16	NP_001234329.2|0.0e+00|ferric-chelate reductase [Solanum lycopersicum]
Solyc07g009520.1	0.553	8.313	3.48222	2.78323e-37	8.95722e-40	XP_025887682.1|6.0e-257|WEB family protein At4g27595, chloroplastic-like isoform X2 [Solanum lycopersicum]
Solyc01g111350.2	5.333	59.796	3.43306	2.07692e-156	1.08617e-159	XP_004231025.1|0.0e+00|protein NUCLEAR FUSION DEFECTIVE 4 [Solanum lycopersicum]
BGI_novel_G000668	0	4.653	3.42566	1.04647e-14	9.38785e-17
Solyc11g007130.1	11.55	118.153	3.33636	7.99052e-258	1.92868e-261	XP_015058994.1|2.1e-243|hippocampus abundant transcript-like protein 1 [Solanum pennellii]
Solyc08g007540.2	11.83	117.91	3.29553	6.63767e-227	2.40321e-230	XP_004244583.1|1.3e-253|ACT domain-containing protein ACR8 [Solanum lycopersicum]
Solyc08g005090.1	0.576	8.663	3.20221	1.95443e-21	1.16363e-23	XP_010324466.1|1.6e-156|uncharacterized protein LOC101261936 [Solanum lycopersicum]
BGI_novel_G000144	0	0.99	3.17802	2.89647e-12	3.15771e-14
Solyc02g050240.2	0.033	2.326	3.12152	3.69884e-12	4.10685e-14	XP_004231723.1|1.7e-220|uncharacterized protein LOC101243654 [Solanum lycopersicum]
Solyc01g005370.2	3.84	34.716	3.05782	9.39797e-66	1.36104e-68	XP_004228711.1|8.1e-93|probable calcium-binding protein CML25 [Solanum lycopersicum]
Solyc10g079230.1	1.43	13.156	3.04158	6.90923e-51	1.52871e-53	XP_004249736.1|4.4e-287|UPF0481 protein At3g47200 [Solanum lycopersicum]
Solyc02g063520.2	1.693	15.29	2.96185	4.63362e-38	1.45395e-40	XP_010317182.1|5.5e-139|homeobox-leucine zipper protein HAT22 [Solanum lycopersicum]
Solyc07g014680.2	0.896	8.763	2.92358	2.4096e-24	1.27953e-26	CCJ09642.1|2.3e-113|Na+ transporter [Solanum lycopersicum var. cerasiforme]
Solyc03g112260.2	0.013	1.173	2.83488	9.19027e-10	1.23483e-11	XP_015068543.1|4.2e-254|protein DETOXIFICATION 16-like [Solanum pennellii]
Solyc07g045060.1	0.54	12.716	2.82015	1.12926e-10	1.37194e-12	OIT27627.1|3.3e-30|hypothetical protein A4A49_54847 [Nicotiana attenuata]
Solyc06g071700.1	0.76	6.07	2.80712	8.93018e-35	3.08953e-37	XP_016578261.1|0.0e+00|PREDICTED: primary amine oxidase-like isoform X1 [Capsicum annuum]
Solyc02g084830.2	0	0.873	2.71772	1.01344e-08	1.59407e-10	XP_015064134.1|0.0e+00|pentatricopeptide repeat-containing protein At5g44230 [Solanum pennellii]
Solyc03g007890.2	0.73	5.746	2.71575	1.06513e-24	5.48464e-27	XP_004234218.1|0.0e+00|heat shock protein 83 [Solanum lycopersicum]
Solyc06g008050.2	0.716	5.56	2.69522	6.0362e-25	3.05962e-27	NP_001307429.1|8.6e-243|probable indole-3-pyruvate monooxygenase YUCCA8 [Solanum lycopersicum]
Solyc05g024410.2	62.456	385.6	2.62794	4.80791e-228	1.54732e-231	XP_004239307.1|7.6e-198|nitrile-specifier protein 5 [Solanum lycopersicum]
Solyc04g008670.1	0.126	2.26	2.61465	3.30543e-09	4.8136e-11	XP_004237179.2|1.2e-209|gibberellin 2-beta-dioxygenase 8-like isoform X1 [Solanum lycopersicum]
Solyc09g014560.1	0.813	8.12	2.53881	1.86328e-18	1.34923e-20	XP_010325794.1|8.1e-31|kirola-like [Solanum lycopersicum]
Solyc11g012700.1	5.65	33.78	2.53613	1.1182e-74	1.39448e-77	XP_027184321.1|0.0e+00|oligopeptide transporter 3-like [Coffea eugenioides]
Solyc09g008020.2	12.626	71.593	2.51966	5.30816e-158	2.56247e-161	XP_004246644.1|2.0e-206|OTU domain-containing protein DDB_G0284757 [Solanum lycopersicum]
Solyc08g005790.2	0.446	3.506	2.47807	2.28919e-13	2.32069e-15	XP_004244682.2|3.1e-222|pectin acetylesterase 8-like [Solanum lycopersicum]
Solyc05g007570.2	2.756	15.93	2.45429	4.19688e-64	6.75337e-67	XP_004238800.1|0.0e+00|uncharacterized protein LOC101267021 [Solanum lycopersicum]
Solyc08g082950.2	7.246	40.663	2.43943	2.93383e-61	5.31105e-64	XP_004246086.1|3.0e-270|aluminum-activated malate transporter 10-like [Solanum lycopersicum]
Solyc03g119300.2	1.473	8.25	2.41798	1.28378e-52	2.73716e-55	XP_004235751.1|0.0e+00|zinc finger protein BRUTUS isoform X1 [Solanum lycopersicum]
Solyc06g036110.1	10.666	60.753	2.40859	8.26514e-35	2.8262e-37	XP_004240724.1|6.9e-143|uncharacterized protein LOC101263030 [Solanum lycopersicum]
Solyc10g005500.2	11.36	58.496	2.3189	6.12353e-65	9.36094e-68	XP_019260466.1|4.7e-210|PREDICTED: metal tolerance protein 9-like isoform X1 [Nicotiana attenuata]
Solyc10g007290.2	94.576	453.56	2.2676	1.8331e-175	7.37427e-179	XP_009598007.1|0.0e+00|PREDICTED: phosphoenolpyruvate carboxylase [Nicotiana tomentosiformis]
Solyc12g088970.1	0.533	456.83	2.23686	6.25745e-06	1.42226e-07	XP_004252778.1|1.1e-310|cytochrome P450 82C4 [Solanum lycopersicum]
Solyc08g014230.2	0	0.77	2.22168	8.95951e-06	2.12292e-07	XP_006366147.1|5.6e-195|PREDICTED: 2-isopropylmalate synthase A-like isoform X1 [Solanum tuberosum]
Solyc01g096140.2	9.65	45.74	2.20872	8.58507e-55	1.72682e-57	XP_004229999.1|1.2e-284|aluminum-activated malate transporter 10 [Solanum lycopersicum]
Solyc01g009190.1	0	0.88	2.18165	1.40745e-05	3.48211e-07	XP_025885393.1|4.2e-252|double-stranded RNA-binding protein 1-like isoform X2 [Solanum lycopersicum]
Solyc01g028800.1	0.503	2.756	2.15613	1.24977e-14	1.1463e-16	XP_004228945.2|0.0e+00|pumilio homolog 12 [Solanum lycopersicum]
Solyc02g082910.2	2.316	10.696	2.11677	6.0836e-27	2.71655e-29	XP_004232549.1|0.0e+00|probable acyl-activating enzyme 1, peroxisomal [Solanum lycopersicum]
Solyc06g067950.2	23.3	101.71	2.10951	9.68642e-75	1.16901e-77	XP_010322678.2|1.9e-160|acyl-protein thioesterase 2-like isoform X1 [Solanum lycopersicum]
Solyc06g060310.2	0.74	3.77	2.10637	7.60356e-16	6.17877e-18	XP_004242029.1|0.0e+00|chlorophyllide a oxygenase, chloroplastic [Solanum lycopersicum]
Solyc07g066480.2	4.5	19.476	2.10166	3.91775e-76	4.57055e-79	NP_001234144.1|0.0e+00|molybdenum cofactor sulfurase [Solanum lycopersicum]
Solyc05g055970.2	11.52	49.626	2.10143	7.75131e-57	1.52793e-59	XP_019069429.1|4.0e-77|protein ACCELERATED CELL DEATH 6-like [Solanum lycopersicum]
Solyc11g007140.1	6.946	30.313	2.08711	9.9385e-64	1.63922e-66	XP_004250476.1|6.1e-182|hippocampus abundant transcript-like protein 1 isoform X1 [Solanum lycopersicum]
Solyc11g069750.1	0.516	2.866	2.08653	1.73782e-09	2.43986e-11	XP_009621124.1|1.3e-279|PREDICTED: high affinity nitrate transporter 2.4-like [Nicotiana tomentosiformis]
Solyc06g034290.2	2.243	9.606	2.07915	1.69815e-32	6.2817e-35	XP_004240757.1|7.1e-295|putative glycerol-3-phosphate transporter 1 [Solanum lycopersicum]
Solyc08g007550.1	0.56	4.973	2.07111	3.4411e-06	7.4337e-08	XP_006358404.1|1.7e-10|PREDICTED: LRR receptor-like serine/threonine-protein kinase FLS2 [Solanum tuberosum]
Solyc05g006790.1	3.856	16.176	2.05645	2.61335e-44	6.83353e-47	XP_019069652.2|2.3e-281|uncharacterized protein LOC101256184 [Solanum lycopersicum]
Solyc12g088140.1	0.873	8.16	2.05573	1.36035e-05	3.35464e-07	XP_004252728.1|3.4e-57|uncharacterized protein At5g65660-like [Solanum lycopersicum]
Solyc06g072840.2	8.606	36.83	2.04684	4.14346e-35	1.40016e-37	XP_004241438.1|7.8e-56|late embryogenesis abundant protein At5g17165 [Solanum lycopersicum]
Solyc01g017720.1	2.153	9.58	2.03313	2.19253e-19	1.49944e-21
Solyc02g093270.2	199.643	805.506	2.01734	1.3423e-117	8.63978e-121	NP_001307032.1|6.2e-137|caffeoyl-CoA O-methyltransferase-like [Solanum lycopersicum]
Solyc02g079170.2	4.17	17.75	2.01257	3.63111e-39	1.11016e-41	XP_015067245.1|0.0e+00|external alternative NAD(P)H-ubiquinone oxidoreductase B2, mitochondrial [Solanum pennellii]
Solyc11g066250.1	5.35	22.133	1.9947	2.04049e-39	6.15644e-42	XP_004250970.1|4.7e-300|serine carboxypeptidase-like [Solanum lycopersicum]
Solyc11g013110.1	3.5	14.573	1.96653	1.22497e-21	7.24397e-24	XP_004250329.1|1.3e-206|flavonol synthase/flavanone 3-hydroxylase [Solanum lycopersicum]
Solyc01g010350.2	4.96	19.806	1.9626	1.66256e-39	4.88242e-42	XP_004228846.1|3.9e-232|triose phosphate/phosphate translocator, chloroplastic-like [Solanum lycopersicum]
Solyc06g035990.2	0	4.213	1.95314	0.000145201	4.35169e-06	XP_025887218.1|1.3e-75|DNA-directed RNA polymerase III subunit RPC3 isoform X2 [Solanum lycopersicum]
Solyc03g119880.2	1.36	7.733	1.93161	3.16609e-06	6.8014e-08	XP_004235729.2|7.9e-90|mavicyanin [Solanum lycopersicum]
Solyc04g005640.2	4.366	18.793	1.90591	1.177e-21	6.91295e-24	XP_004237041.1|3.1e-142|extracellular ribonuclease LE-like [Solanum lycopersicum]
Solyc02g063250.2	1.413	6.01	1.82188	1.78687e-08	2.89688e-10	XP_004233487.1|7.0e-151|peptide methionine sulfoxide reductase isoform X1 [Solanum lycopersicum]
Solyc02g091820.1	0.093	1.17	1.80856	0.00060517	2.10828e-05	XP_004233614.1|8.9e-183|transcription factor bHLH18-like [Solanum lycopersicum]
Solyc11g072890.1	19.173	68.933	1.8019	1.99934e-26	9.16905e-29	XP_004251294.1|3.4e-84|uncharacterized protein LOC101257533 [Solanum lycopersicum]
Solyc02g063410.2	43.733	153.493	1.79711	2.03118e-42	5.47466e-45	XP_004233959.1|2.8e-73|uncharacterized protein At5g65660-like [Solanum lycopersicum]
Solyc02g092800.2	35.283	121.716	1.79619	1.03168e-111	8.30058e-115	XP_009616361.1|9.5e-264|PREDICTED: metal transporter Nramp3-like [Nicotiana tomentosiformis]
Solyc01g066980.2	3.323	13.34	1.79437	2.25925e-09	3.24463e-11	XP_004229230.1|7.8e-55|flowering-promoting factor 1-like protein 3 [Solanum lycopersicum]
Solyc01g102390.2	131.313	449.366	1.7813	9.72969e-84	1.01767e-86	XP_004230374.2|7.9e-119|germin-like protein 5-1 [Solanum lycopersicum]
Solyc04g077960.1	2.543	9.496	1.78037	3.7286e-13	3.8549e-15	XP_004238565.2|3.1e-205|transcription factor bHLH84 [Solanum lycopersicum]
Solyc04g009910.2	17.666	60.853	1.76825	1.25718e-41	3.48964e-44	XP_004236793.1|3.6e-160|phosphoenolpyruvate carboxylase kinase 2 [Solanum lycopersicum]
Solyc09g009480.1	1.19	5.906	1.76313	4.35876e-05	1.14852e-06	XP_004246543.1|1.1e-94|uncharacterized protein LOC101262845 [Solanum lycopersicum]
Solyc04g012050.2	0.993	3.926	1.76139	1.5838e-08	2.54218e-10	XP_004237144.1|6.7e-229|ethylene-responsive transcription factor ABR1-like [Solanum lycopersicum]
BGI_novel_G000054	0.406	2.1	1.75378	0.000102471	2.9639e-06
Solyc01g100270.2	5.473	18.663	1.75297	5.46004e-44	1.44968e-46	XP_010313383.1|0.0e+00|uncharacterized protein LOC101268229 isoform X1 [Solanum lycopersicum]
Solyc08g075520.2	50.28	168.556	1.7421	9.72969e-84	1.00345e-86	XP_004246001.1|1.2e-264|uncharacterized protein LOC101249748 isoform X1 [Solanum lycopersicum]
BGI_novel_G000468	1.323	5.17	1.72443	1.50846e-07	2.66399e-09
Solyc04g079640.2	9.486	31.44	1.72082	3.76863e-45	9.3996e-48	XP_004238199.1|0.0e+00|cytochrome P450 CYP82D47 [Solanum lycopersicum]
Solyc01g101070.2	24.946	81.503	1.71907	1.69765e-101	1.57076e-104	XP_006358552.1|0.0e+00|PREDICTED: pleiotropic drug resistance protein 3 [Solanum tuberosum]
Solyc07g049670.2	0.82	3.183	1.71606	1.44712e-07	2.54984e-09	XP_004243495.1|8.5e-276|benzyl alcohol O-benzoyltransferase-like [Solanum lycopersicum]
Solyc09g064870.2	8.87	29.236	1.71283	4.6284e-45	1.17302e-47	XP_025888640.1|6.6e-276|DUF21 domain-containing protein At4g14240 isoform X3 [Solanum lycopersicum]
Solyc03g034110.2	0.436	2.99	1.71254	0.000909641	3.33733e-05	XP_004234562.1|8.5e-118|homeobox-leucine zipper protein ATHB-21-like [Solanum lycopersicum]
Solyc09g014310.2	0	0.703	1.68148	0.00170343	6.83895e-05	XP_004246335.2|8.7e-181|desiccation-related protein PCC13-62-like [Solanum lycopersicum]
Solyc01g080790.2	3.053	11.246	1.68004	8.39668e-08	1.45248e-09	XP_004229500.1|5.0e-131|uncharacterized protein LOC101249206 [Solanum lycopersicum]
Solyc03g112330.2	8.686	28.716	1.67846	2.93432e-26	1.3693e-28	XP_010319013.1|1.7e-120|uncharacterized protein LOC101266322 [Solanum lycopersicum]
Solyc06g051550.2	50.456	160.043	1.67712	2.72208e-108	2.29961e-111	NP_001234654.2|5.9e-173|bHLH transcriptional regulator [Solanum lycopersicum]
Solyc04g025750.2	44.426	151.39	1.65936	5.38234e-12	6.04101e-14	XP_019069025.2|2.4e-207|WAT1-related protein At1g70260-like [Solanum lycopersicum]
Solyc09g066050.2	0.303	1.42	1.64356	0.000403943	1.36175e-05	XP_019071012.2|2.8e-304|homeobox-leucine zipper protein HDG11-like isoform X2 [Solanum lycopersicum]
Solyc03g083420.2	12.023	37.3	1.63236	8.00978e-69	1.06333e-71	XP_004234957.1|0.0e+00|probable plastid-lipid-associated protein 14, chloroplastic isoform X1 [Solanum lycopersicum]
Solyc03g093450.2	6.226	19.13	1.61775	7.02376e-47	1.69533e-49	XP_010318173.1|0.0e+00|U-box domain-containing protein 35-like [Solanum lycopersicum]
Solyc04g077370.1	0	0.253	1.61508	0.00281397	0.000122598	XP_010320283.1|0.0e+00|G-type lectin S-receptor-like serine/threonine-protein kinase At4g27290 [Solanum lycopersicum]
Solyc07g006090.1	2.116	7.546	1.6144	8.67794e-07	1.73154e-08	XP_004242631.1|1.0e-149|gamma-glutamyl peptidase 3-like [Solanum lycopersicum]
Solyc02g005180.2	9.666	29.52	1.60637	4.58239e-57	8.6641e-60	XP_004231463.1|4.3e-209|sugar transporter ERD6-like 5 isoform X1 [Solanum lycopersicum]
Solyc04g077300.2	0.143	0.816	1.59308	0.00210107	8.68895e-05	XP_006356823.1|2.9e-296|PREDICTED: G-type lectin S-receptor-like serine/threonine-protein kinase At4g27290 isoform X3 [Solanum tuberosum]
Solyc01g097570.2	28.376	85.816	1.58303	1.86074e-30	7.33578e-33	OSX73063.1|3.8e-11|hypothetical protein BU14_0381s0004 [Porphyra umbilicalis]
Solyc01g102650.2	4.96	12.536	1.57731	1.54554e-26	6.96357e-29	XP_015168642.1|5.8e-07|PREDICTED: nuclear pore complex protein NUP98A-like isoform X1 [Solanum tuberosum]
Solyc04g074530.2	1.136	3.46	1.56203	6.28427e-09	9.53081e-11	XP_025886595.1|4.3e-203|alcohol dehydrogenase-like 2 isoform X1 [Solanum lycopersicum]
Solyc12g036390.1	7.923	23.72	1.56041	4.54665e-26	2.15828e-28	XP_004252230.1|3.4e-265|protein SAR DEFICIENT 1-like [Solanum lycopersicum]
Solyc05g014380.2	1.186	3.63	1.55261	8.9639e-14	8.94298e-16	XP_004239178.1|0.0e+00|putative ABC transporter C family member 15 [Solanum lycopersicum]
Solyc06g060600.1	18.01	55.103	1.54547	2.69229e-48	6.17348e-51	XP_004242008.1|6.2e-181|probable trehalose-phosphate phosphatase F [Solanum lycopersicum]
BGI_novel_G000601	0.103	0.42	1.54058	0.000570175	1.97719e-05
BGI_novel_G000521	0.023	0.796	1.53393	0.00599463	0.000292038
Solyc02g080040.2	1.206	3.703	1.52564	1.79842e-09	2.5394e-11	XP_025885209.1|6.3e-250|cysteine-rich receptor-like protein kinase 10 [Solanum lycopersicum]
Solyc12g013660.1	1.066	3.69	1.52257	4.61689e-05	1.22396e-06	XP_015060096.1|7.9e-193|uncharacterized protein LOC107005968 [Solanum pennellii]
Solyc09g082340.2	0.076	0.513	1.51742	0.00670856	0.000330867	NP_001308118.1|0.0e+00|vicilin precursor [Solanum lycopersicum]
Solyc01g104430.1	1.953	5.93	1.50588	4.85754e-08	8.12911e-10	XP_025883587.1|2.6e-57|uncharacterized protein LOC101262462 [Solanum lycopersicum]
Solyc08g079900.1	0.76	2.59	1.50134	6.05044e-05	1.64052e-06	XP_019070934.1|0.0e+00|subtilisin-like protease SBT1.7 [Solanum lycopersicum]
Solyc06g071130.2	11.18	31.19	1.48977	6.71384e-65	1.05334e-67	XP_004242165.1|0.0e+00|zinc finger protein BRUTUS-like At1g74770 isoform X1 [Solanum lycopersicum]
Solyc03g071850.1	11.26	31.5	1.47854	2.88985e-32	1.08117e-34	XP_004234916.1|2.2e-264|beta-D-glucosyl crocetin beta-1,6-glucosyltransferase-like [Solanum lycopersicum]
Solyc01g005630.1	4.513	13.546	1.47787	2.09278e-08	3.40966e-10	XP_004228934.1|1.9e-110|ethylene-responsive transcription factor ERN1-like [Solanum lycopersicum]
Solyc02g089490.2	4.223	12.176	1.47109	4.72711e-15	4.08853e-17
Solyc02g084280.2	1.85	6.16	1.47048	1.17815e-06	2.40767e-08	XP_010316411.1|9.0e-17|uncharacterized protein LOC104645749 isoform X1 [Solanum lycopersicum]
Solyc11g018800.1	4.87	14.41	1.45913	2.83915e-08	4.65997e-10	XP_004250402.1|5.9e-179|lignin-forming anionic peroxidase [Solanum lycopersicum]
Solyc06g007180.2	17.613	58.356	1.45253	0.000205299	6.43367e-06	XP_009766230.1|0.0e+00|PREDICTED: asparagine synthetase [glutamine-hydrolyzing] [Nicotiana sylvestris]
Solyc05g015350.2	0.596	1.953	1.44763	0.000176049	5.42495e-06	XP_004239209.1|2.0e-302|cytochrome P450 78A5-like [Solanum lycopersicum]
Solyc08g078060.2	32.35	87.503	1.44386	3.39982e-38	1.05312e-40	XP_004245814.1|6.5e-65|uncharacterized protein LOC101245084 isoform X1 [Solanum lycopersicum]
Solyc07g052670.2	360.47	957.686	1.43941	8.70751e-128	4.90406e-131	XP_010323806.1|5.4e-133|transcription factor ILR3 isoform X1 [Solanum lycopersicum]
Solyc03g113350.2	59.336	159.05	1.43881	1.82426e-99	1.76129e-102	XP_010318962.1|0.0e+00|zinc finger protein BRUTUS-like At1g74770 isoform X1 [Solanum lycopersicum]
Solyc01g068630.2	14.633	39.72	1.43256	2.09325e-26	9.68396e-29	NP_001316510.1|4.8e-142|haloacid dehalogenase-like hydrolase superfamily protein [Solanum lycopersicum]
Solyc04g077310.2	1.13	3.276	1.42944	5.58059e-07	1.08882e-08	XP_025886297.1|1.5e-256|uncharacterized protein LOC104647168 [Solanum lycopersicum]
Solyc09g091240.2	7.81	21.116	1.42566	3.35625e-25	1.6337e-27	XP_004247813.1|4.5e-200|protein PAM71-homolog, chloroplastic [Solanum lycopersicum]
BGI_novel_G000501	0	0.213	1.41894	0.0105983	0.000567479
Solyc09g009260.2	286.91	751.42	1.40047	7.75131e-57	1.52766e-59	NP_001308301.1|2.2e-203|fructose-1,6-bisphosphate aldolase [Solanum lycopersicum]
Solyc10g078220.1	3.01	8.386	1.39843	6.25242e-09	9.45735e-11	XP_006364800.1|9.4e-264|PREDICTED: cytochrome P450 98A3-like isoform X4 [Solanum tuberosum]
Solyc06g060470.1	0.603	2.523	1.38916	0.00963548	0.000505845	XP_004242290.1|3.8e-138|protein MKS1-like [Solanum lycopersicum]
Solyc04g082530.2	2.703	7.23	1.3882	1.03763e-14	9.26678e-17	XP_004238631.2|0.0e+00|uncharacterized protein LOC101253085 [Solanum lycopersicum]
Solyc04g080330.2	0.593	2.123	1.38666	0.00372894	0.000170781	XP_004238604.1|2.7e-207|peroxidase 10-like [Solanum lycopersicum]
Solyc01g096430.2	38.916	110.54	1.38132	3.20362e-48	7.47485e-51	NP_001316467.1|3.7e-110|NAD(P)H:quinone oxidoreductase [Solanum lycopersicum]
Solyc01g060240.2	8.236	21.61	1.37726	5.21954e-14	5.01838e-16	XP_016581247.1|1.2e-26|PREDICTED: uncharacterized protein LOC107878678 isoform X1 [Capsicum annuum]
Solyc06g068230.2	0.92	2.39	1.35968	4.22146e-11	4.95884e-13	XP_004241691.2|0.0e+00|protein TSS [Solanum lycopersicum]
Solyc02g091540.2	7.913	21.05	1.35608	1.76753e-09	2.48868e-11	XP_004231982.3|1.8e-64|uncharacterized protein At4g22758-like [Solanum lycopersicum]
Solyc02g093330.2	2.736	6.623	1.35541	1.17265e-14	1.06142e-16	XP_004233600.3|0.0e+00|nuclear pore complex protein NUP98B-like isoform X2 [Solanum lycopersicum]
Solyc09g061700.2	0.06	0.62	1.34557	0.0249913	0.00160858	XP_004247097.1|7.0e-163|protein SULFUR DEFICIENCY-INDUCED 1 [Solanum lycopersicum]
Solyc12g056570.1	0	0.483	1.34079	0.0176466	0.00105774	XP_010314477.1|6.9e-197|UPF0496 protein At1g20180-like [Solanum lycopersicum]
Solyc12g008990.1	2.503	6.41	1.33964	1.5437e-12	1.65809e-14	XP_004252067.1|0.0e+00|U-box domain-containing protein 34 [Solanum lycopersicum]
Solyc04g082630.2	0.44	1.516	1.3307	0.0077183	0.000391535	XP_004238446.3|3.1e-274|glyceraldehyde-3-phosphate dehydrogenase B, chloroplastic [Solanum lycopersicum]
Solyc00g020840.2	37.376	95.366	1.32967	9.48349e-17	7.32493e-19	XP_004253331.2|1.5e-123|ferric reduction oxidase 4 [Solanum lycopersicum]
Solyc00g201160.2	1.63	4.476	1.3285	8.28696e-06	1.94056e-07	PHU20621.1|1.8e-136|G-type lectin S-receptor-like serine/threonine-protein kinase [Capsicum chinense]
Solyc01g100490.2	190.736	471.523	1.3225	4.17876e-82	4.53884e-85	NP_001296307.1|3.6e-181|nicotianamine synthase [Solanum lycopersicum]
Solyc04g009900.2	7.89	20.3	1.32222	2.24489e-11	2.60089e-13	NP_001234394.1|5.7e-161|phosphoenolpyruvate carboxylase kinase 1 [Solanum lycopersicum]
Solyc01g068410.2	3.356	8.673	1.31936	7.21415e-10	9.51904e-12	NP_001234192.1|3.4e-204|auxin efflux carrier component 5 [Solanum lycopersicum]
Solyc01g091250.2	0.283	1.376	1.31811	0.0264111	0.00171803	XP_010325703.1|4.1e-120|uncharacterized protein LOC104649008 [Solanum lycopersicum]
Solyc03g043660.2	50.153	123.473	1.31513	6.34962e-66	8.94025e-69	XP_004234635.1|0.0e+00|protease Do-like 7 [Solanum lycopersicum]
Solyc05g051880.2	1.776	4.286	1.31195	1.67621e-06	3.49969e-08	XP_019069377.1|1.0e-173|probable trehalose-phosphate phosphatase H isoform X3 [Solanum lycopersicum]
Solyc04g025530.2	0.95	2.623	1.30847	8.83496e-05	2.51635e-06	XP_019258514.1|2.1e-270|PREDICTED: glutamate decarboxylase 4 [Nicotiana attenuata]
Solyc07g008590.1	0.066	0.333	1.29793	0.0315337	0.00212863	XP_010323339.1|0.0e+00|receptor-like protein EIX1 [Solanum lycopersicum]
Solyc06g049020.1	23.013	90.523	1.29677	0.0234072	0.00148025	XP_004240863.1|2.4e-123|uncharacterized protein LOC101254906 [Solanum lycopersicum]
Solyc06g076550.2	2.81	7.19	1.2931	3.01322e-08	4.95779e-10	XP_004242069.2|5.2e-264|UDP-glucose iridoid glucosyltransferase-like [Solanum lycopersicum]
Solyc06g074200.2	0.543	2.016	1.28732	0.020278	0.00124973	XP_004241330.1|1.8e-78|photosystem I subunit O [Solanum lycopersicum]
Solyc03g115900.2	0.896	2.683	1.2669	0.00541613	0.000261459	NP_001316908.1|7.8e-165|chlorophyll a-b binding protein CAB11 [Solanum lycopersicum]
Solyc01g067370.2	5.82	14.336	1.26104	9.68035e-10	1.30637e-11	NP_001234726.1|3.9e-124|uncharacterized protein LOC543717 [Solanum lycopersicum]
Solyc12g011450.1	1.82	5.32	1.25986	0.00451823	0.000212298	NP_001296244.1|3.5e-153|chlorophyll a-b binding protein 13, chloroplastic [Solanum lycopersicum]
Solyc02g071030.1	1.196	4.003	1.25839	0.0206875	0.00127996	NP_001316856.1|5.1e-152|chlorophyll a-b binding protein 1B, chloroplastic [Solanum lycopersicum]
Solyc11g069220.1	16.306	38.94	1.25773	1.1248e-31	4.25343e-34	XP_025884137.1|9.3e-288|MLO-like protein 6 [Solanum lycopersicum]
Solyc01g096720.2	0	0.303	1.25607	0.0284608	0.0018872	XP_006347687.1|1.4e-262|PREDICTED: protein ZINC INDUCED FACILITATOR-LIKE 1-like isoform X1 [Solanum tuberosum]
Solyc07g006560.2	1.4	4.323	1.25518	0.010383	0.000553022	XP_015080705.1|5.2e-100|ribonuclease MC-like [Solanum pennellii]
Solyc06g009390.2	4.663	11.343	1.24648	8.97946e-10	1.2029e-11	XP_004240563.1|2.9e-201|probable protein phosphatase 2C 47 isoform X1 [Solanum lycopersicum]
Solyc04g011780.1	0.11	2.603	1.24642	0.0367301	0.00258727	XP_025886239.1|2.0e-51|monothiol glutaredoxin-S1-like [Solanum lycopersicum]
Solyc08g062570.1	0.256	1.243	1.24594	0.0420493	0.00302962	PHT55406.1|4.1e-44|hypothetical protein CQW23_03892 [Capsicum baccatum]
Solyc04g074540.2	0.336	1.206	1.24063	0.0290701	0.00193309	XP_015072969.1|1.4e-219|alcohol dehydrogenase-like 1 [Solanum pennellii]
Solyc09g090140.2	737.986	1713.95	1.23196	2.39817e-58	4.43785e-61	XP_004247734.1|7.2e-186|malate dehydrogenase [Solanum lycopersicum]
Solyc02g070940.1	5.633	14.436	1.23158	0.000120234	3.5454e-06	NP_001316856.1|5.1e-152|chlorophyll a-b binding protein 1B, chloroplastic [Solanum lycopersicum]
Solyc01g107550.2	60.35	139.73	1.227	2.7666e-54	5.67611e-57	XP_019236761.1|1.2e-230|PREDICTED: methylthioribose kinase [Nicotiana attenuata]
Solyc06g053930.2	7.066	17.126	1.2231	1.65952e-07	2.96415e-09	XP_004241038.1|3.9e-78|calmodulin-like protein 8 [Solanum lycopersicum]
Solyc06g082230.2	0.44	1.15	1.22288	0.00178171	7.18907e-05	XP_004242551.2|0.0e+00|cation/H(+) antiporter 14 isoform X1 [Solanum lycopersicum]
Solyc06g066770.1	14.346	33.463	1.22073	1.13267e-20	6.92596e-23	XP_004242212.1|6.0e-220|F-box/kelch-repeat protein At1g80440-like [Solanum lycopersicum]
Solyc01g009320.1	0.593	1.75	1.21797	0.0125527	0.000700415	XP_004228871.1|1.4e-236|E3 ubiquitin-protein ligase PUB23-like [Solanum lycopersicum]
Solyc04g071080.1	7.806	18.22	1.21149	3.14873e-16	2.53337e-18	XP_015158666.1|3.0e-179|PREDICTED: extensin-1-like [Solanum tuberosum]
Solyc02g032860.2	4.123	9.666	1.20567	2.30422e-10	2.9199e-12	XP_004231612.1|5.1e-268|5'-adenylylsulfate reductase 3, chloroplastic [Solanum lycopersicum]
Solyc04g080170.2	5.233	12.02	1.20539	1.04673e-25	5.01092e-28	XP_004238243.1|0.0e+00|probable serine/threonine protein kinase IRE4 isoform X1 [Solanum lycopersicum]
Solyc11g068370.1	28.126	63.963	1.20207	8.95057e-46	2.19642e-48	XP_010313358.1|1.0e-198|transcription factor TGA9-like isoform X2 [Solanum lycopersicum]
Solyc11g006670.1	1.16	3.42	1.20018	0.0164872	0.000975649	XP_004250469.4|4.5e-139|transcription repressor OFP13 [Solanum lycopersicum]
Solyc04g058100.2	1747.81	3959.14	1.19777	2.42962e-71	3.12767e-74	NP_001234054.1|6.7e-41|metallothionein-like protein type 2 [Solanum lycopersicum]
Solyc10g008150.1	5.896	15.6	1.19764	0.00270805	0.000117111	XP_004248179.3|1.7e-56|glutaredoxin-C9-like [Solanum lycopersicum]
Solyc07g066250.1	0.333	1.086	1.18597	0.0384154	0.00272681	NP_001234179.1|4.4e-246|lateral suppressor protein [Solanum lycopersicum]
Solyc02g068460.1	1.7	4.78	1.18044	0.0143572	0.000826502	PHT89782.1|9.9e-73|hypothetical protein T459_04895 [Capsicum annuum]
Solyc02g071970.1	1.94	5.206	1.17825	0.00760809	0.00038319	XP_004233072.1|1.1e-114|N66 matrix protein [Solanum lycopersicum]
Solyc02g092820.2	3.003	6.936	1.17717	4.78264e-09	7.11874e-11	XP_004231891.1|0.0e+00|probable indole-3-acetic acid-amido synthetase GH3.1 [Solanum lycopersicum]
Solyc03g005760.1	63.13	142.563	1.17522	2.1567e-19	1.46602e-21	XP_010317413.1|1.2e-153|chlorophyll a-b binding protein 3A, chloroplastic-like [Solanum lycopersicum]
Solyc04g072270.1	0.54	1.65	1.17463	0.0319294	0.00217718	XP_010320130.1|2.3e-228|midasin isoform X2 [Solanum lycopersicum]
Solyc09g008190.2	16.26	36.736	1.1728	5.92643e-18	4.38677e-20	XP_019071337.1|1.4e-102|uncharacterized protein LOC101262949 [Solanum lycopersicum]
Solyc01g008690.2	0.9	2.173	1.17209	0.00488884	0.000232268	XP_004228507.1|3.1e-189|GDP-mannose transporter GONST1-like isoform X1 [Solanum lycopersicum]
Solyc03g095370.2	2.583	6.71	1.17107	7.38392e-07	1.45552e-08
Solyc03g112040.1	0.623	1.686	1.1697	0.0107112	0.000574987	XP_004236279.1|6.8e-291|(+)-menthofuran synthase-like [Solanum lycopersicum]
Solyc10g012420.2	16.26	36.55	1.16366	4.2014e-17	3.1944e-19	XP_009797229.1|3.5e-81|PREDICTED: uncharacterized protein LOC104243688 isoform X2 [Nicotiana sylvestris]
Solyc03g005770.1	6.333	15.006	1.15352	0.000174134	5.35894e-06	NP_001316911.1|1.6e-153|chlorophyll a/b-binding protein [Solanum lycopersicum]
Solyc01g095530.2	10.096	24.03	1.15111	0.000141138	4.21858e-06	XP_010326840.1|2.2e-45|uncharacterized protein LOC104649409 [Solanum lycopersicum]
Solyc05g014390.2	0.906	2.343	1.14771	0.0146695	0.000847427	XP_018625908.1|3.7e-143|PREDICTED: putative ABC transporter C family member 15 [Nicotiana tomentosiformis]
Solyc01g107390.2	13.073	28.9	1.14693	2.1567e-19	1.46626e-21	NP_001308616.1|0.0e+00|indole-3-acetic acid-amido synthetase GH3.2 [Solanum lycopersicum]
Solyc09g091910.1	8.956	19.89	1.14598	1.2083e-18	8.65225e-21	XP_004247857.1|0.0e+00|purple acid phosphatase 15 isoform X1 [Solanum lycopersicum]
Solyc02g083690.2	0.6	1.596	1.14288	0.00846419	0.000433799	XP_004232503.1|8.4e-261|protein EARLY-RESPONSIVE TO DEHYDRATION 7, chloroplastic-like [Solanum lycopersicum]
Solyc02g084440.2	1.253	3.383	1.13831	0.0203389	0.00125431	NP_001294934.1|3.1e-221|fructose-bisphosphate aldolase [Solanum lycopersicum]
Solyc09g091600.2	2.48	5.813	1.13382	0.000260823	8.38352e-06	XP_004247838.1|1.1e-165|protein SULFUR DEFICIENCY-INDUCED 2 [Solanum lycopersicum]
Solyc07g063600.2	0.706	1.95	1.13252	0.0273593	0.00179071	XP_004244187.1|5.5e-152|chlorophyll a-b binding protein 13, chloroplastic-like [Solanum lycopersicum]
Solyc07g056480.2	17.27	37.723	1.12464	1.21576e-15	1.00751e-17	NP_001234379.2|1.0e-127|glutathione S-transferase/peroxidase [Solanum lycopersicum]
Solyc04g014450.1	6.376	14.13	1.12236	1.9123e-16	1.5155e-18	XP_010319233.1|0.0e+00|uncharacterized protein LOC101260634 [Solanum lycopersicum]
Solyc08g006100.2	42.49	91.486	1.11661	1.80005e-27	7.82064e-30	XP_004244468.1|1.2e-136|uncharacterized protein LOC101259062 [Solanum lycopersicum]
Solyc06g068930.1	20.753	44.16	1.09809	1.04914e-23	5.73993e-26	XP_010322626.1|1.4e-140|protein TIFY 6B-like [Solanum lycopersicum]
Solyc11g066400.1	9.903	21.493	1.09662	3.87399e-09	5.66329e-11	XP_004251369.1|1.9e-168|zinc finger protein ZAT5 [Solanum lycopersicum]
Solyc11g005840.1	24.163	51.123	1.09158	5.94962e-25	2.9918e-27	XP_004249899.1|0.0e+00|uncharacterized protein LOC101247180 [Solanum lycopersicum]
Solyc02g081080.2	17.406	36.58	1.08313	1.7561e-27	7.55906e-30	NP_001333367.1|0.0e+00|O-fucosyltransferase family protein [Solanum lycopersicum]
Solyc12g096320.1	28.04	56.83	1.0781	1.70428e-23	9.46137e-26	XP_004253067.1|8.8e-129|gamma-glutamylcyclotransferase 2-1 [Solanum lycopersicum]
Solyc02g089500.2	5.826	13.036	1.07783	0.000372359	1.24479e-05	XP_019068015.1|2.4e-76|LOW QUALITY PROTEIN: zinc finger protein CONSTANS-LIKE 2 [Solanum lycopersicum]
Solyc02g092700.2	1.523	3.44	1.07687	0.000794506	2.8446e-05	XP_010316003.1|1.6e-176|protein CONSERVED IN THE GREEN LINEAGE AND DIATOMS 27, chloroplastic [Solanum lycopersicum]
Solyc06g065010.2	17.79	37.453	1.07589	1.5006e-16	1.17715e-18	XP_004241846.1|2.8e-213|GDSL esterase/lipase 2 [Solanum lycopersicum]
Solyc12g045020.1	11.053	23.313	1.07277	4.24789e-13	4.42596e-15	XP_004252382.1|8.2e-289|cytochrome P450 CYP736A12 [Solanum lycopersicum]
Solyc06g064990.2	4.186	9.086	1.06948	1.97785e-05	4.97531e-07	XP_004242242.1|1.9e-227|GDSL esterase/lipase 5-like [Solanum lycopersicum]
Solyc12g096310.1	1.82	4.44	1.06446	0.0237618	0.00150746	XP_004253068.1|1.0e-135|uncharacterized protein LOC101258542 [Solanum lycopersicum]
Solyc01g110010.2	0.486	1.206	1.06267	0.0353017	0.00246677	XP_004231426.1|0.0e+00|pentatricopeptide repeat-containing protein At1g74600, chloroplastic [Solanum lycopersicum]
Solyc01g095770.2	0.966	2.096	1.06038	0.000364914	1.21844e-05	PHT40910.1|0.0e+00|Cyclic nucleotide-gated ion channel 1 [Capsicum baccatum]
Solyc03g114090.1	6.91	14.77	1.05451	3.87643e-07	7.36051e-09	XP_025885867.1|1.4e-177|RING-H2 finger protein ATL46-like [Solanum lycopersicum]
Solyc10g076480.1	10.553	21.796	1.04719	3.96115e-14	3.79256e-16	XP_015089587.1|4.4e-287|ammonium transporter 2 [Solanum pennellii]
Solyc07g006420.1	2.526	5.606	1.04236	0.00246251	0.000105205	XP_025887640.1|2.1e-162|uncharacterized protein LOC112941801 [Solanum lycopersicum]
Solyc02g083720.2	1.716	3.706	1.04016	0.000337902	1.11862e-05	XP_019067935.1|0.0e+00|MLO-like protein 4 isoform X1 [Solanum lycopersicum]
Solyc11g066420.1	14.17	28.903	1.03127	4.5596e-15	3.92531e-17	XP_004250985.1|2.4e-227|protein SENSITIVE TO PROTON RHIZOTOXICITY 2 [Solanum lycopersicum]
Solyc12g006380.1	5.91	12.563	1.03102	9.18492e-05	2.62711e-06	NP_001234624.1|3.2e-213|2-oxoglutarate-dependent dioxygenase [Solanum lycopersicum]
Solyc02g064690.2	5.34	10.98	1.02669	7.63487e-09	1.1702e-10	XP_004233456.1|1.5e-246|probable N-acetyltransferase HLS1 [Solanum lycopersicum]
Solyc06g076020.2	18.476	37.54	1.02591	2.13477e-14	1.9838e-16	NP_001234491.2|0.0e+00|heat shock cognate 70 kDa protein 1 [Solanum lycopersicum]
Solyc09g009540.2	44.246	89.18	1.02536	2.38605e-29	9.79071e-32	NP_001311372.1|8.0e-214|alpha/beta-hydrolases superfamily protein precursor [Solanum lycopersicum]
Solyc08g082030.2	4.003	8.896	1.01316	0.0111835	0.000607807	XP_024932665.1|6.4e-07|uncharacterized protein LOC112492650 [Ziziphus jujuba]
Solyc03g096820.2	41.926	83.52	1.01141	4.85505e-37	1.58202e-39	NP_001340701.1|0.0e+00|aluminum-activated malate transporter protein ALMT4 [Solanum lycopersicum]
Solyc07g054150.2	3.376	6.896	1.00686	0.000315139	1.03576e-05	XP_010323734.1|1.7e-15|uncharacterized protein LOC101267135 isoform X1 [Solanum lycopersicum]
Solyc12g005820.1	12.476	25.556	1.00359	0.000116524	3.41256e-06	XP_010313670.1|2.1e-98|vascular-related unknown protein 1-like isoform X1 [Solanum lycopersicum]
Solyc10g086180.1	86.22	171.23	1.00226	7.56351e-22	4.38147e-24	XP_009625397.1|0.0e+00|PREDICTED: phenylalanine ammonia-lyase [Nicotiana tomentosiformis]
0<log2<1
Solyc12g098850.1	111.98	221.166	0.995852	1.26615e-27	5.39916e-30	NP_001353312.1|4.6e-229|thioredoxin (TRX)-like superfamily protein [Solanum lycopersicum]
Solyc04g048900.2	11.533	22.993	0.99485	1.87582e-11	2.1582e-13	XP_004237555.1|1.8e-254|calreticulin-3-like [Solanum lycopersicum]
Solyc11g040330.1	20.42	40.32	0.993728	4.22999e-22	2.43337e-24	XP_004250707.1|0.0e+00|uncharacterized protein LOC101263970 isoform X1 [Solanum lycopersicum]
Solyc08g082900.2	3.04	6.106	0.992616	1.04078e-07	1.81711e-09	XP_004245475.1|0.0e+00|uncharacterized protein LOC101244103 [Solanum lycopersicum]
Solyc04g074960.2	6.4	12.786	0.990795	4.60116e-09	6.8301e-11	XP_004237967.1|6.3e-147|esterase OVCA2 isoform X1 [Solanum lycopersicum]
BGI_novel_G000071	0.82	1.753	0.987262	0.00894435	0.000462725
Solyc03g119810.1	73.036	144.15	0.986284	1.46561e-15	1.22046e-17	XP_004235734.1|1.0e-80|uncharacterized protein LOC101258448 [Solanum lycopersicum]
Solyc12g049550.1	17.82	35.146	0.981486	1.53648e-11	1.7616e-13	XP_004252404.1|1.1e-216|GDSL esterase/lipase 5 [Solanum lycopersicum]
Solyc02g077290.1	1.44	2.923	0.981263	8.46993e-05	2.39535e-06	NP_001307560.1|0.0e+00|glutamate receptor 1.2 precursor [Solanum lycopersicum]
Solyc08g007060.2	50.9	99.923	0.980213	6.77123e-16	5.47517e-18	XP_004244546.1|0.0e+00|protein NRT1/ PTR FAMILY 7.3 [Solanum lycopersicum]
Solyc03g118970.2	6.713	13.243	0.97326	3.89147e-09	5.72965e-11	XP_016562783.1|3.7e-253|PREDICTED: protein DETOXIFICATION 16-like [Capsicum annuum]
Solyc03g119290.2	11.41	14.063	0.969918	1.2743e-19	8.45843e-22	PHU24293.1|2.5e-304|hypothetical protein BC332_09400 [Capsicum chinense]
Solyc11g066930.1	3.43	7.013	0.967863	0.00135995	5.33758e-05	XP_004251021.1|2.4e-188|uncharacterized protein LOC101249043 [Solanum lycopersicum]
Solyc02g092550.2	52.22	100.926	0.96615	9.83495e-28	4.15427e-30	XP_004231911.1|1.5e-124|LOB domain-containing protein 37 [Solanum lycopersicum]
Solyc03g065250.2	1.61	3.3	0.965149	0.00178398	7.21255e-05	XP_009787251.1|0.0e+00|PREDICTED: protein ECERIFERUM 1-like isoform X1 [Nicotiana sylvestris]
Solyc08g041700.1	36.28	70.29	0.964563	1.38428e-18	9.96808e-21	XP_004244936.1|9.5e-243|uncharacterized protein LOC101259656 [Solanum lycopersicum]
Solyc06g035960.2	2.083	4.2	0.956764	0.000778431	2.78078e-05	XP_004240733.1|1.1e-295|oxalate--CoA ligase isoform X1 [Solanum lycopersicum]
Solyc04g071100.1	43.33	85.013	0.955482	5.9717e-06	1.3477e-07	XP_025886563.1|4.9e-57|extensin-3-like [Solanum lycopersicum]
Solyc06g031710.2	11.536	22.193	0.952041	9.21712e-11	1.10866e-12	XP_004240770.1|4.5e-204|WAT1-related protein At2g39510 [Solanum lycopersicum]
Solyc12g011340.1	50.583	96.886	0.951855	3.1186e-22	1.78149e-24	XP_004251830.1|1.1e-183|polyadenylate-binding protein-interacting protein 8 isoform X4 [Solanum lycopersicum]
Solyc05g014470.2	1103.63	2112.93	0.950169	3.08935e-22	1.75235e-24	NP_001266254.2|1.9e-191|glyceraldehyde-3-phosphate dehydrogenase [Solanum lycopersicum]
Solyc00g026160.2	89.57	178.806	0.949437	0.000406173	1.3709e-05	XP_004253331.2|1.8e-257|ferric reduction oxidase 4 [Solanum lycopersicum]
Solyc02g077120.2	1.16	2.71	0.949086	0.0420741	0.00303818	XP_004233850.1|1.2e-123|GDSL esterase/lipase At1g28580-like isoform X1 [Solanum lycopersicum]
Solyc07g062310.2	15	28.403	0.94288	1.75388e-16	1.38289e-18	XP_004244284.1|5.8e-229|protein GRAVITROPIC IN THE LIGHT 1 [Solanum lycopersicum]
Solyc02g062270.2	4.863	9.766	0.938776	0.00493909	0.000236245	XP_010317236.1|8.1e-77|nucleolin-like isoform X1 [Solanum lycopersicum]
Solyc10g006050.2	22.86	42.23	0.937507	1.01696e-23	5.52298e-26	XP_004248330.1|1.0e-255|heterogeneous nuclear ribonucleoprotein 1 [Solanum lycopersicum]
Solyc10g006920.2	3.53	6.89	0.93119	0.000131083	3.90223e-06	XP_004248503.1|5.0e-224|CBS domain-containing protein CBSX5 [Solanum lycopersicum]
Solyc02g086460.2	76.463	145.186	0.930717	7.18815e-05	1.9837e-06	XP_006338598.1|0.0e+00|PREDICTED: titin isoform X3 [Solanum tuberosum]
Solyc09g009810.1	13.636	26.413	0.929793	1.2539e-05	3.07195e-07	XP_004246518.1|1.1e-103|uncharacterized protein LOC101255524 [Solanum lycopersicum]
Solyc06g068650.2	83.6	157.47	0.928767	5.80744e-23	3.27074e-25	XP_015080149.1|5.0e-310|4-coumarate--CoA ligase 2 [Solanum pennellii]
Solyc09g011870.1	16.483	31.2	0.925074	2.68865e-11	3.13665e-13	XP_004246360.1|3.6e-223|arogenate dehydrogenase 2, chloroplastic-like [Solanum lycopersicum]
Solyc06g051830.1	1.303	2.566	0.924435	0.0011707	4.47037e-05	XP_025887276.1|0.0e+00|potassium transporter 26-like [Solanum lycopersicum]
Solyc07g044860.2	2.156	4.433	0.915116	0.0316197	0.00213571	NP_001234109.2|6.9e-144|oxygen-evolving enhancer protein 2, chloroplastic [Solanum lycopersicum]
Solyc05g052150.2	32.726	62.15	0.914657	8.28696e-06	1.93781e-07	NP_001315280.1|4.3e-43|ATP synthase subunit delta, mitochondrial [Solanum lycopersicum]
Solyc05g008370.1	11.246	21.316	0.912384	1.70905e-06	3.57513e-08	XP_004238861.1|3.2e-146|probable ribose-5-phosphate isomerase 2 [Solanum lycopersicum]
Solyc07g053760.2	28.226	52.543	0.909441	5.86137e-15	5.11673e-17	XP_019193935.1|7.8e-123|PREDICTED: probable protein phosphatase 2C 58 [Ipomoea nil]
Solyc06g034110.2	38.083	70.686	0.907073	1.246e-20	7.71921e-23	NP_001234071.2|1.3e-147|acid phosphatase 1 precursor [Solanum lycopersicum]
Solyc08g007070.2	24.6	46.17	0.904993	4.21831e-08	7.02543e-10	XP_004244546.1|1.7e-29|protein NRT1/ PTR FAMILY 7.3 [Solanum lycopersicum]
Solyc11g066670.1	8.396	15.793	0.904436	4.72685e-07	9.07036e-09	XP_004251001.1|4.6e-273|zeatin O-glucosyltransferase [Solanum lycopersicum]
Solyc03g116340.2	22.626	41.42	0.901832	9.13138e-17	7.01623e-19	XP_004236021.1|2.0e-132|transcription factor bHLH47 [Solanum lycopersicum]
Solyc03g097230.1	35	65.153	0.899031	1.98976e-10	2.4974e-12	XP_004235360.1|2.1e-110|putative gamma-glutamylcyclotransferase At3g02910 [Solanum lycopersicum]
Solyc01g005680.2	4.996	9.583	0.898058	0.000873049	3.17849e-05	XP_004228702.1|8.1e-112|cytokinin riboside 5'-monophosphate phosphoribohydrolase LOG8 [Solanum lycopersicum]
Solyc02g086430.2	33.09	61.23	0.897932	7.47648e-14	7.39889e-16	XP_004233706.1|6.8e-142|zinc finger CCCH domain-containing protein 14 [Solanum lycopersicum]
Solyc04g011510.2	472.986	869.523	0.897353	1.95025e-31	7.4533e-34	XP_004236746.1|1.1e-130|triosephosphate isomerase, cytosolic [Solanum lycopersicum]
Solyc01g100240.2	4.976	9.25	0.892143	1.68535e-08	2.71874e-10	XP_004230284.1|0.0e+00|calmodulin-binding protein 60 C [Solanum lycopersicum]
Solyc02g080640.2	19.873	36.763	0.891061	6.35734e-10	8.31175e-12	NP_001233829.1|2.5e-268|adenylyl-sulfate reductase [Solanum lycopersicum]
Solyc09g074430.2	2.856	5.436	0.89005	0.000994027	3.70291e-05	NP_001307793.1|1.7e-230|probable indole-3-pyruvate monooxygenase YUCCA10 [Solanum lycopersicum]
Solyc03g007290.2	10.866	20.103	0.888319	5.28711e-09	7.91217e-11	XP_004234173.1|2.5e-190|probable trehalose-phosphate phosphatase 2 [Solanum lycopersicum]
Solyc12g088000.1	33.523	61.463	0.884398	1.15142e-12	1.22747e-14	PHT32657.1|3.0e-191|Tyrosine aminotransferase [Capsicum baccatum]
Solyc01g010180.2	2.21	4.333	0.882668	0.0195058	0.00119295	XP_004228419.1|4.6e-92|uncharacterized protein LOC101260464 [Solanum lycopersicum]
Solyc11g066140.1	2.35	4.446	0.881298	0.00092652	3.41789e-05	XP_004250967.1|0.0e+00|uncharacterized protein LOC101257925 [Solanum lycopersicum]
Solyc10g085880.1	9.903	18.626	0.880349	0.000273262	8.8062e-06	K4D422.1|4.2e-199|RecName: Full=UDP-glycosyltransferase 73C4; Short=SlUGT73C4
Solyc03g111830.2	27.816	50.75	0.877493	6.66971e-14	6.57365e-16	XP_004236292.1|2.1e-170|protein-L-isoaspartate O-methyltransferase 1 [Solanum lycopersicum]
Solyc05g054090.2	276.246	501.606	0.877333	2.56462e-29	1.06266e-31	KGN46555.1|1.0e-10|hypothetical protein Csa_6G108530 [Cucumis sativus]
Solyc12g095880.1	80.53	144.99	0.866607	2.69005e-27	1.19038e-29	XP_004253102.1|2.1e-284|ATP-dependent 6-phosphofructokinase 6-like isoform X1 [Solanum lycopersicum]
Solyc03g031620.2	8.203	14.963	0.8664	2.28528e-07	4.21055e-09	XP_004234472.1|2.5e-265|5'-adenylylsulfate reductase 3, chloroplastic-like [Solanum lycopersicum]
Solyc08g079590.1	5.82	11.863	0.862443	0.00124974	4.83146e-05	XP_004245701.1|5.1e-141|uncharacterized protein At4g22758 isoform X1 [Solanum lycopersicum]
Solyc01g102400.2	152.45	274.063	0.862029	4.84107e-19	3.38863e-21	XP_004230375.1|1.6e-119|germin-like protein 5-1 [Solanum lycopersicum]
Solyc01g106350.2	8.32	14.936	0.859348	1.31791e-11	1.5004e-13	XP_019067404.1|0.0e+00|fatty acid amide hydrolase isoform X2 [Solanum lycopersicum]
Solyc06g068490.2	17.386	31.763	0.857814	1.93148e-20	1.21213e-22	XP_004241677.1|4.7e-249|magnesium transporter MRS2-1 [Solanum lycopersicum]
Solyc03g007270.2	46.81	83.74	0.857049	5.30112e-25	2.64438e-27	XP_019243414.1|2.9e-174|PREDICTED: probable protein phosphatase 2C 76 isoform X1 [Nicotiana attenuata]
Solyc07g047850.2	6.58	12.146	0.855277	0.00248731	0.000106465	NP_001234739.1|1.8e-154|chlorophyll a-b binding protein 4, chloroplastic [Solanum lycopersicum]
Solyc07g043250.1	7.466	14.19	0.854597	0.0195377	0.00119625	XP_010323951.1|9.1e-88|VQ motif-containing protein 22 [Solanum lycopersicum]
Solyc12g006470.1	12.85	23.143	0.854307	1.25926e-09	1.75784e-11	XP_015165791.1|3.8e-240|PREDICTED: gamma aminobutyrate transaminase 2-like [Solanum tuberosum]
Solyc01g087150.2	17.35	30.49	0.851742	2.85545e-13	2.90622e-15	XP_004229626.1|7.9e-294|protein DETOXIFICATION 43 [Solanum lycopersicum]
BGI_novel_G000493	2.363	4.456	0.851155	0.00766374	0.000387833
Solyc07g042170.2	25.163	45.26	0.851008	5.79356e-09	8.71667e-11	XP_004243696.1|2.2e-118|protein TIFY 10b-like [Solanum lycopersicum]
Solyc12g056240.1	36.273	65.23	0.849168	3.12701e-08	5.15758e-10	XP_004252596.1|4.8e-95|probable glutathione peroxidase 8 [Solanum lycopersicum]
Solyc04g056620.1	34.886	62.183	0.84264	5.82244e-11	6.8863e-13	NP_001234230.1|8.6e-200|auxin efflux carrier component 10 [Solanum lycopersicum]
Solyc07g044840.2	291.356	514.833	0.842617	5.8394e-41	1.64437e-43	PHT42715.1|0.0e+00|2,3-bisphosphoglycerate-independent phosphoglycerate mutase [Capsicum baccatum]
Solyc01g057910.2	1.7	3.246	0.841362	0.0363074	0.00254995	XP_004229031.1|1.2e-171|transcription factor MYB78-like [Solanum lycopersicum]
Solyc05g051660.1	11.393	20.706	0.841314	0.000469551	1.59615e-05	NP_001316336.1|2.6e-190|acylsugar acylhydrolase 1 [Solanum lycopersicum]
Solyc05g008290.2	15.673	27.793	0.840182	1.00541e-14	8.89815e-17	XP_004238853.1|0.0e+00|multicopper oxidase LPR2 [Solanum lycopersicum]
Solyc10g074490.1	1.913	3.533	0.830971	0.000177085	5.47112e-06	XP_004249701.1|0.0e+00|O-fucosyltransferase 6-like [Solanum lycopersicum]
Solyc09g011190.1	23.27	42.406	0.829747	0.00200449	8.23308e-05	XP_010325836.1|3.6e-53|uncharacterized protein LOC104649061 [Solanum lycopersicum]
Solyc03g007360.2	13.153	23.386	0.828529	2.07361e-06	4.3878e-08	XP_004234178.1|1.9e-143|bidirectional sugar transporter SWEET3b isoform X2 [Solanum lycopersicum]
Solyc02g071520.2	6.32	11.31	0.828156	8.04727e-05	2.25316e-06	XP_004233011.1|1.0e-127|bidirectional sugar transporter SWEET2a [Solanum lycopersicum]
Solyc10g081790.1	41.003	72.19	0.823637	6.55896e-09	9.97379e-11	XP_004249398.1|5.9e-110|RING-H2 finger protein ATL70-like [Solanum lycopersicum]
Solyc01g112050.2	12.783	22.323	0.820061	2.12204e-16	1.69026e-18	XP_004231460.1|0.0e+00|nitrate regulatory gene2 protein [Solanum lycopersicum]
Solyc02g080890.2	9.7	16.903	0.811922	1.94891e-10	2.43829e-12	NP_001352691.1|0.0e+00|WRKY transcription factor 6 isoform 1 [Solanum lycopersicum]
Solyc03g083400.2	11.736	20.55	0.810352	6.77975e-07	1.33369e-08	XP_004234958.1|7.7e-156|zinc finger protein CONSTANS-LIKE 6 isoform X1 [Solanum lycopersicum]
Solyc12g007240.1	10.493	18.983	0.80899	0.010137	0.000536658	XP_004251618.1|2.2e-77|protein SPEAR1-like [Solanum lycopersicum]
Solyc07g009130.2	27.73	47.886	0.808291	3.2758e-30	1.30463e-32	XP_004242843.1|0.0e+00|cadmium/zinc-transporting ATPase HMA3-like isoform X2 [Solanum lycopersicum]
Solyc11g040150.1	65.263	112.43	0.805905	7.53308e-20	4.87902e-22	XP_004250702.1|2.4e-285|heparan-alpha-glucosaminide N-acetyltransferase [Solanum lycopersicum]
Solyc02g064960.2	9.583	16.6	0.803443	2.56689e-11	2.98427e-13	NP_001233908.2|1.3e-303|APETALA2-like protein AP2b [Solanum lycopersicum]
Solyc01g095320.2	2.523	4.443	0.803249	0.000336821	1.11244e-05	XP_004229963.1|0.0e+00|BAG family molecular chaperone regulator 6 [Solanum lycopersicum]
Solyc02g094400.2	106.546	184.063	0.801175	1.00765e-12	1.0661e-14	XP_004231754.1|9.1e-211|glycerophosphodiester phosphodiesterase GDPD1, chloroplastic [Solanum lycopersicum]
Solyc08g078210.2	12.013	20.86	0.799124	2.16292e-07	3.9677e-09	XP_004245803.1|5.3e-206|nudix hydrolase 8 [Solanum lycopersicum]
Solyc05g006620.2	4.736	8.206	0.79861	1.41583e-09	1.98209e-11	XP_010320639.1|0.0e+00|TMV resistance protein N-like isoform X1 [Solanum lycopersicum]
BGI_novel_G000329	0.53	0.95	0.792648	0.0209303	0.00130088
Solyc02g081990.2	59.06	100.95	0.78838	1.22169e-09	1.69167e-11	XP_004233764.1|0.0e+00|probable pectinesterase/pectinesterase inhibitor 46 [Solanum lycopersicum]
Solyc07g064160.2	107.143	183.043	0.788271	1.47342e-14	1.35737e-16	XP_004244150.1|5.1e-196|thiamine thiazole synthase, chloroplastic [Solanum lycopersicum]
Solyc12g042570.1	5.556	9.453	0.776049	7.82036e-05	2.18333e-06	XP_004252301.1|1.8e-194|probable protein phosphatase 2C 60 [Solanum lycopersicum]
Solyc11g011970.1	9.913	17.17	0.772186	0.00221219	9.23748e-05	XP_010312732.1|2.7e-116|tyrosine-protein phosphatase DSP1 isoform X2 [Solanum lycopersicum]
Solyc05g013660.2	29.833	50.266	0.770213	1.85997e-15	1.55634e-17	XP_004239135.1|8.3e-233|uncharacterized protein LOC101244185 isoform X1 [Solanum lycopersicum]
Solyc06g071780.2	5.306	9.31	0.769863	0.0140531	0.000805037	XP_004241537.1|5.6e-122|protein DEHYDRATION-INDUCED 19 homolog 5 isoform X1 [Solanum lycopersicum]
Solyc07g009290.2	26.923	45.896	0.768697	2.07485e-05	5.24161e-07	XP_015081859.1|2.7e-41|uncharacterized protein LOC107025603 [Solanum pennellii]
Solyc04g082360.1	22.933	38.863	0.768187	1.36517e-07	2.39995e-09	XP_004238423.1|6.0e-153|F-box protein At2g26160 [Solanum lycopersicum]
Solyc01g096340.2	14.206	24.233	0.768	2.31324e-05	5.88128e-07	XP_004230018.1|1.2e-59|auxin-responsive protein SAUR32 [Solanum lycopersicum]
Solyc05g050380.2	4.343	7.036	0.767721	6.92586e-06	1.58533e-07	XP_010321516.1|0.0e+00|cyclic nucleotide-gated ion channel 1 isoform X2 [Solanum lycopersicum]
Solyc05g013440.2	64.163	107.82	0.767449	6.41088e-20	4.10061e-22	XP_015076172.1|0.0e+00|uncharacterized protein LOC107020357 [Solanum pennellii]
Solyc04g079680.2	1.866	3.286	0.766186	0.0248105	0.00159095	XP_004238201.1|2.0e-305|cytochrome P450 CYP82D47 [Solanum lycopersicum]
Solyc03g032090.1	11.86	20.06	0.763378	5.0123e-07	9.65843e-09	XP_010317678.1|1.7e-245|amino acid transporter AVT3B [Solanum lycopersicum]
Solyc03g111010.2	115.406	192.936	0.760697	1.22018e-24	6.37249e-27	NP_001234803.2|4.9e-190|glyceraldehyde 3-phosphate dehydrogenase [Solanum lycopersicum]
Solyc01g080220.2	88.676	148.313	0.760357	4.39472e-20	2.79333e-22	XP_010322752.1|9.7e-134|endo-1,3;1,4-beta-D-glucanase-like [Solanum lycopersicum]
Solyc06g069040.2	25.6	42.903	0.755277	1.34269e-08	2.12817e-10	NP_001234091.1|9.0e-129|putative glutathione S-transferase T4 [Solanum lycopersicum]
Solyc01g102640.2	4.11	6.81	0.753339	8.06489e-09	1.25233e-10	XP_009763547.1|4.5e-16|PREDICTED: flocculation protein FLO11-like isoform X1 [Nicotiana sylvestris]
Solyc06g051350.2	7.193	12.116	0.751028	6.2729e-05	1.70841e-06	XP_004240931.1|1.7e-262|protein ESKIMO 1-like [Solanum lycopersicum]
Solyc07g043170.2	8.51	14.24	0.750923	3.4619e-07	6.55947e-09	XP_004243651.1|1.3e-280|UDP-glucose flavonoid 3-O-glucosyltransferase 6 [Solanum lycopersicum]
Solyc08g081700.1	6.286	10.92	0.750388	0.0314669	0.00212032	PHT92306.1|6.6e-88|hypothetical protein T459_00188, partial [Capsicum annuum]
Solyc02g081050.2	9.743	16.35	0.748826	4.45216e-09	6.59101e-11	NP_001234725.1|0.0e+00|LysM receptor-like kinase 12 precursor [Solanum lycopersicum]
Solyc06g063370.2	7.46	12.78	0.746197	0.0107112	0.000575244	NP_001317571.1|1.0e-161|chlorophyll a-b binding protein Cab9 [Solanum lycopersicum]
Solyc08g066650.2	2.506	4.25	0.741225	0.00475916	0.000225341	NP_001266276.2|0.0e+00|carotenoid cleavage dioxygenase 8, chloroplastic-like [Solanum lycopersicum]
Solyc11g010210.1	18.053	29.926	0.741217	5.41755e-09	8.12916e-11	XP_025884061.1|0.0e+00|putative WEB family protein At1g65010, chloroplastic isoform X2 [Solanum lycopersicum]
Solyc05g053120.1	4.093	6.9	0.740146	0.00418696	0.000195048	XP_004240219.1|3.9e-272|zeatin O-xylosyltransferase-like [Solanum lycopersicum]
Solyc06g069670.2	1.34	2.39	0.739105	0.000207358	6.51486e-06	XP_015078547.1|1.4e-301|formin-like protein 20 [Solanum pennellii]
Solyc07g009280.2	29.01	47.756	0.735131	0.000820619	2.9579e-05	XP_015081841.1|1.8e-28|defensin-like protein 1 [Solanum pennellii]
Solyc11g069270.1	38.093	62.35	0.730524	5.53236e-19	3.89477e-21	NP_001234312.2|0.0e+00|beta-galactosidase 5 [Solanum lycopersicum]
Solyc02g084930.2	7.796	12.866	0.728062	3.11503e-06	6.67919e-08	XP_004232430.1|2.5e-281|abscisic acid 8'-hydroxylase 3-like [Solanum lycopersicum]
Solyc10g080460.1	19.773	31.596	0.720825	2.75673e-10	3.52659e-12	XP_004249281.1|1.2e-215|uncharacterized protein LOC101261766 isoform X1 [Solanum lycopersicum]
Solyc03g114280.2	15.36	25.076	0.72012	8.18702e-09	1.27459e-10	XP_004236109.1|5.0e-224|E3 ubiquitin-protein ligase SIS3 isoform X1 [Solanum lycopersicum]
Solyc12g044820.1	4.133	6.76	0.719787	5.54598e-07	1.07983e-08	XP_025884294.1|0.0e+00|ABC transporter C family member 8 isoform X1 [Solanum lycopersicum]
Solyc09g059460.2	61.73	100.146	0.716459	2.88631e-14	2.72863e-16	XP_004247067.1|1.5e-292|membrane protein of ER body 2 [Solanum lycopersicum]
Solyc08g082110.2	4.873	8.063	0.714751	0.0028238	0.000123139	XP_004245530.1|4.9e-200|probable WRKY transcription factor 53 [Solanum lycopersicum]
Solyc07g008930.1	48.143	78.613	0.714635	2.76336e-07	5.14698e-09	XP_015170874.1|1.5e-108|PREDICTED: uncharacterized protein LOC107063476 [Solanum tuberosum]
Solyc08g007980.2	7.01	11.34	0.714498	0.000702602	2.48729e-05	XP_004244608.1|1.0e-117|protein LURP-one-related 4-like [Solanum lycopersicum]
Solyc01g088660.2	78.653	128.323	0.713235	5.63259e-07	1.10123e-08	XP_004229715.1|1.2e-51|uncharacterized protein LOC101248137 [Solanum lycopersicum]
Solyc08g067700.1	6.863	11.4	0.710038	0.0120741	0.000667872	PSS01157.1|2.0e-33|ATP-dependent RNA helicase ddx56 [Actinidia chinensis var. chinensis]
Solyc03g097650.2	22.833	37.086	0.708186	7.51192e-07	1.48377e-08	XP_004235471.1|2.0e-150|NAC domain-containing protein 83 [Solanum lycopersicum]
Solyc01g090180.2	15.673	25.47	0.707923	5.69984e-06	1.27718e-07	XP_004229740.1|2.4e-160|4,5-DOPA dioxygenase extradiol [Solanum lycopersicum]
Solyc10g007690.2	4.906	8.17	0.707138	0.0206777	0.00127802	NP_001332771.1|1.6e-154|chlorophyll a-b binding protein 8, chloroplastic [Solanum lycopersicum]
BGI_novel_G000422	3.35	5.536	0.706832	0.0101831	0.000540328
Solyc08g075960.2	77.72	125.1	0.706007	3.00066e-18	2.19696e-20	XP_004245954.1|3.6e-123|MOB kinase activator-like 1A [Solanum lycopersicum]
Solyc06g066800.1	10.293	17.01	0.705441	0.0122656	0.000679944	XP_004241723.1|1.0e-146|protein CDI [Solanum lycopersicum]
Solyc05g051530.2	27.306	43.963	0.70201	1.48463e-10	1.83951e-12	XP_015076630.1|0.0e+00|ABC transporter G family member 11-like [Solanum pennellii]
Solyc06g063090.2	33.133	53.2	0.701519	3.62835e-14	3.45933e-16	XP_010318451.1|3.3e-264|alanine aminotransferase 2 [Solanum lycopersicum]
Solyc06g075580.2	12.466	20.036	0.7009	1.6254e-10	2.02701e-12	XP_016577816.1|0.0e+00|PREDICTED: 125 kDa kinesin-related protein-like [Capsicum annuum]
Solyc08g065190.2	31.73	50.92	0.699988	3.02095e-12	3.30556e-14	XP_004245100.1|3.9e-230|zinc transporter 4, chloroplastic [Solanum lycopersicum]
Solyc02g093860.2	39.82	63.833	0.699829	8.26356e-17	6.31618e-19	XP_015064000.1|4.0e-265|lysine histidine transporter 1-like [Solanum pennellii]
Solyc04g051550.1	2.63	4.3	0.698303	0.00344175	0.000155348	XP_010319794.1|0.0e+00|uncharacterized protein LOC101246131 [Solanum lycopersicum]
Solyc01g101060.2	1217.17	1948.88	0.696838	2.03006e-14	1.87832e-16	NP_001234425.1|1.0e-231|S-adenosylmethionine synthase 1 [Solanum lycopersicum]
Solyc03g097840.2	35.906	57.796	0.695363	7.19825e-06	1.65058e-07	XP_015071128.1|7.1e-203|mitochondrial phosphate carrier protein 3, mitochondrial [Solanum pennellii]
Solyc06g062430.2	12.753	21.946	0.694223	0.000684621	2.40435e-05	XP_015078660.1|1.1e-180|inositol oxygenase 1-like [Solanum pennellii]
Solyc03g118750.2	7.503	12.19	0.693694	0.00324566	0.000145191	NP_001234549.1|3.5e-291|phosphoethanolamine N-methyltransferase [Solanum lycopersicum]
Solyc01g091030.2	8.226	13.396	0.69262	0.00403659	0.000187556	XP_004229795.1|2.9e-89|auxin-induced protein 10A5 [Solanum lycopersicum]
Solyc02g091590.2	7.423	11.86	0.6892	7.05543e-08	1.19776e-09	NP_001234869.1|0.0e+00|symbiosis receptor-like kinase precursor [Solanum lycopersicum]
Solyc03g113920.2	3.76	6.063	0.687868	0.000574689	1.99516e-05	XP_004236142.1|0.0e+00|calmodulin-binding protein 60 A [Solanum lycopersicum]
Solyc06g065530.2	10.126	16.27	0.687802	0.000146508	4.39679e-06	NP_001333717.1|1.2e-219|GDSL-like lipase/acylhydrolase superfamily protein precursor [Solanum lycopersicum]
Solyc02g081690.1	20.376	32.48	0.687145	1.97724e-09	2.82372e-11	XP_004232642.1|7.7e-284|UDP-glycosyltransferase 43 [Solanum lycopersicum]
Solyc06g007910.2	27.12	43.62	0.685823	0.0010712	4.03781e-05	PHT63578.1|2.7e-51|hypothetical protein T459_32587 [Capsicum annuum]
Solyc01g095830.2	17.693	28.25	0.68379	5.56559e-06	1.24038e-07	XP_004231219.1|2.8e-221|putative RING-H2 finger protein ATL21A [Solanum lycopersicum]
Solyc12g094410.1	7.843	12.646	0.683538	8.73994e-05	2.48226e-06	XP_010314845.1|0.0e+00|serine/threonine-protein kinase STY46 isoform X1 [Solanum lycopersicum]
Solyc06g054260.1	9.483	15.466	0.683479	0.0194513	0.00118705	NP_001295880.1|6.0e-116|photosystem I reaction center subunit II, chloroplastic [Solanum lycopersicum]
Solyc06g061200.1	665.07	1083.3	0.682122	0.00489147	0.000232787	AAP83840.1|6.8e-185|glycine-rich protein TomR2 [Solanum lycopersicum]
Solyc10g079620.1	30.85	48.826	0.673878	2.35021e-07	4.35855e-09	NP_001334518.1|2.9e-172|haloacid dehalogenase [Solanum lycopersicum]
Solyc08g077910.2	48.33	76.913	0.673791	0.000106246	3.0859e-06	XP_004245822.1|3.3e-148|expansin-like B1 [Solanum lycopersicum]
Solyc05g005040.2	4.636	7.426	0.673576	0.00380697	0.000175355	XP_004239337.3|2.3e-291|polygalacturonase At1g48100 [Solanum lycopersicum]
Solyc02g063420.2	96.953	152.323	0.669305	2.50202e-12	2.71761e-14	XP_004233471.1|1.2e-77|uncharacterized protein At5g65660-like [Solanum lycopersicum]
BGI_novel_G000380	181.1	283.75	0.667963	2.24875e-16	1.80023e-18
Solyc05g007240.1	41.886	66.043	0.666515	1.6555e-06	3.44979e-08	XP_004238783.1|1.1e-94|uncharacterized protein LOC101261409 [Solanum lycopersicum]
Solyc04g054930.2	29.906	46.823	0.6641	1.09126e-10	1.32138e-12	XP_004237406.1|2.0e-221|probable trehalose-phosphate phosphatase J [Solanum lycopersicum]
Solyc11g012250.1	8.546	13.563	0.662452	0.00386343	0.000178422	XP_015057976.1|1.2e-196|acyl-CoA--sterol O-acyltransferase 1-like [Solanum pennellii]
Solyc11g073010.1	4.67	7.433	0.658657	0.0134556	0.000761525	XP_004251304.1|0.0e+00|exocyst complex component EXO70H1 [Solanum lycopersicum]
Solyc09g007920.2	1257.71	1990.19	0.657062	0.00354867	0.000161031	AXY78876.1|0.0e+00|phenylalanine ammonia-lyase [Solanum tuberosum]
Solyc12g006840.1	1.786	2.866	0.655281	0.042678	0.00310067	XP_010314054.2|0.0e+00|G-type lectin S-receptor-like serine/threonine-protein kinase CES101 [Solanum lycopersicum]
Solyc03g005260.2	13.67	21.27	0.649518	1.07323e-05	2.58616e-07	XP_004234020.1|2.7e-273|ATP sulfurylase 1, chloroplastic [Solanum lycopersicum]
Solyc03g083960.2	12.343	19.166	0.648516	7.09369e-05	1.95477e-06	XP_025885725.1|7.1e-210|trehalose-phosphate phosphatase A [Solanum lycopersicum]
Solyc12g019060.1	33.603	51.94	0.648218	3.7432e-15	3.20742e-17	XP_004251987.1|0.0e+00|ankyrin repeat-containing protein At5g02620-like [Solanum lycopersicum]
Solyc09g011990.1	2.353	3.73	0.647921	0.027067	0.00176723	XP_004246354.1|0.0e+00|L-type lectin-domain containing receptor kinase IV.1 [Solanum lycopersicum]
Solyc10g084680.1	48.853	75.326	0.642633	1.20442e-09	1.66191e-11	XP_004249529.2|4.0e-258|molybdate transporter 1 [Solanum lycopersicum]
Solyc09g083090.2	17.96	27.743	0.641197	1.55561e-07	2.75352e-09	XP_004247628.1|1.0e-191|CBL-interacting serine/threonine-protein kinase 7 [Solanum lycopersicum]
Solyc08g062950.2	9.516	14.71	0.64043	3.94912e-06	8.58096e-08	XP_004245085.1|8.8e-301|cytochrome P450 711A1 isoform X1 [Solanum lycopersicum]
Solyc10g076890.1	28.206	43.456	0.639518	7.31942e-10	9.68738e-12	XP_004249088.1|2.4e-144|binding partner of ACD11 1 [Solanum lycopersicum]
Solyc06g074370.1	8.666	13.586	0.636254	0.00157668	6.26029e-05	XP_004241316.1|3.2e-227|beta-1,6-galactosyltransferase GALT29A [Solanum lycopersicum]
Solyc09g011240.2	20.623	31.733	0.6362	2.35021e-07	4.35202e-09	PHT98316.1|2.5e-158|Aldo-keto reductase family 4 member C11 [Capsicum chinense]
Solyc05g021580.2	2.096	3.27	0.63514	0.00115428	4.39739e-05	XP_015076297.1|1.2e-24|serine/threonine-protein kinase TOR-like [Solanum pennellii]
Solyc06g060170.2	14.376	22.07	0.634368	6.80139e-08	1.14916e-09	XP_004242037.1|3.8e-288|probable polygalacturonase [Solanum lycopersicum]
Solyc07g049360.2	113.773	174.206	0.632423	1.75623e-08	2.84014e-10	XP_004243516.1|6.0e-47|small ubiquitin-related modifier 1 [Solanum lycopersicum]
Solyc03g007380.1	5.51	8.6	0.631404	0.0229664	0.0014496	XP_004234275.1|3.8e-211|probable WRKY transcription factor 41 [Solanum lycopersicum]
Solyc04g050790.2	16.176	24.98	0.631304	0.00100484	3.75127e-05	XP_004237501.1|1.0e-77|uncharacterized protein LOC101243779 [Solanum lycopersicum]
Solyc01g108120.2	4.336	6.77	0.630549	0.0212473	0.00132486	XP_004230781.1|5.7e-169|B3 domain-containing protein At5g42700 [Solanum lycopersicum]
Solyc06g074530.1	40.1	61.46	0.630395	9.30813e-07	1.876e-08	XP_004241304.1|1.1e-247|arogenate dehydratase/prephenate dehydratase 6, chloroplastic-like [Solanum lycopersicum]
Solyc09g007910.2	26.563	40.526	0.628085	2.14179e-10	2.69684e-12	XP_006364021.1|0.0e+00|PREDICTED: phenylalanine ammonia-lyase [Solanum tuberosum]
Solyc06g075660.2	33.493	51.29	0.626857	1.90567e-07	3.43446e-09	NP_001310217.1|1.8e-108|transcription factor MYB48-like [Solanum lycopersicum]
Solyc08g008380.2	11.18	17.11	0.624798	5.43398e-07	1.05366e-08	XP_019070562.1|0.0e+00|auxin response factor 12 isoform X2 [Solanum lycopersicum]
Solyc01g097840.2	7.413	11.3	0.621791	4.74376e-06	1.04386e-07	XP_004230120.1|0.0e+00|probable serine/threonine-protein kinase WNK9 [Solanum lycopersicum]
Solyc05g050280.2	12.926	19.66	0.617879	5.15427e-06	1.14249e-07	XP_004240084.1|1.6e-266|jasmonic acid-amido synthetase JAR1 [Solanum lycopersicum]
Solyc03g078370.1	3.16	4.846	0.617571	0.0101129	0.000534166	XP_004235071.1|0.0e+00|G-type lectin S-receptor-like serine/threonine-protein kinase LECRK2 [Solanum lycopersicum]
Solyc08g077770.2	17.726	26.95	0.617501	5.9717e-06	1.34734e-07	NP_001239047.1|1.4e-115|calcineurin B-like 1 [Solanum lycopersicum]
Solyc02g071780.2	24.35	36.92	0.617432	2.76218e-08	4.52251e-10	XP_004232984.1|0.0e+00|MACPF domain-containing protein CAD1 [Solanum lycopersicum]
Solyc05g005150.1	26.356	40.026	0.61714	6.10413e-06	1.3825e-07	XP_004238648.1|2.2e-217|F-box/kelch-repeat protein At1g23390 [Solanum lycopersicum]
Solyc01g080200.2	26.2	39.373	0.613588	1.95309e-18	1.42211e-20	XP_015055715.1|0.0e+00|mediator of RNA polymerase II transcription subunit 33A [Solanum pennellii]
BGI_novel_G000015	10.623	16.046	0.610256	2.46908e-06	5.26434e-08
Solyc04g040130.1	12.836	19.71	0.609983	0.0152541	0.000889204	XP_025886452.1|1.8e-211|delta(12)-fatty-acid desaturase FAD2-like [Solanum lycopersicum]
Solyc10g044510.1	9.44	14.313	0.609608	0.000449511	1.52622e-05	XP_004248847.1|0.0e+00|MLO-like protein 4 isoform X1 [Solanum lycopersicum]
Solyc01g107100.2	44.816	67.616	0.606766	3.86519e-05	1.0138e-06	XP_016539429.1|3.1e-38|PREDICTED: uncharacterized protein LOC107840181 [Capsicum annuum]
Solyc02g078210.2	106.496	151.8	0.606492	2.77864e-07	5.18662e-09	XP_004232877.1|0.0e+00|probable ubiquitin-conjugating enzyme E2 24 [Solanum lycopersicum]
Solyc08g076890.2	121.256	180.273	0.606441	1.80194e-09	2.55887e-11	XP_025888175.1|5.5e-25|glycine-rich cell wall structural protein 1.8-like [Solanum lycopersicum]
Solyc01g112040.2	17.096	25.83	0.603179	0.000602589	2.09687e-05
Solyc02g083680.1	48.966	73.52	0.602894	5.17911e-12	5.79207e-14	XP_025885285.1|0.0e+00|histidine kinase 1 isoform X1 [Solanum lycopersicum]
Solyc09g065520.2	19.32	28.983	0.602281	2.13995e-07	3.90879e-09	XP_015088591.1|2.6e-195|homocysteine S-methyltransferase 2 isoform X1 [Solanum pennellii]
Solyc08g007080.2	10.71	15.833	0.602059	7.82484e-06	1.81944e-07	XP_010324566.1|0.0e+00|type I inositol polyphosphate 5-phosphatase 2-like isoform X1 [Solanum lycopersicum]
Solyc03g007770.2	47.69	71.513	0.600363	2.35021e-07	4.34834e-09	XP_004234208.1|0.0e+00|S-type anion channel SLAH2 [Solanum lycopersicum]
Solyc07g063090.1	19.343	29.513	0.599496	0.0267937	0.00174507	XP_016579536.1|1.7e-56|PREDICTED: protein GRIM REAPER [Capsicum annuum]
Solyc05g046300.2	32.2	47	0.594633	3.46234e-10	4.47104e-12	XP_004240130.1|1.2e-246|ethanolamine-phosphate cytidylyltransferase [Solanum lycopersicum]
Solyc06g075970.2	16.996	25.353	0.594443	4.1576e-08	6.90759e-10	XP_004241239.1|0.0e+00|uncharacterized protein LOC101251992 [Solanum lycopersicum]
Solyc04g014510.2	2309.47	3435.73	0.592756	2.71466e-10	3.45094e-12	NP_001309987.1|3.8e-214|glutamine synthetase cytosolic isozyme 1-1 [Solanum lycopersicum]
Solyc12g010200.1	22.633	33.55	0.592403	1.27916e-10	1.56949e-12	XP_006350086.1|0.0e+00|PREDICTED: probable galacturonosyltransferase 6 [Solanum tuberosum]
Solyc12g014250.1	55.963	82.936	0.588616	1.36837e-13	1.37619e-15	XP_009604678.1|0.0e+00|PREDICTED: phosphoenolpyruvate carboxylase [Nicotiana tomentosiformis]
Solyc07g007690.2	8.15	12.06	0.588332	1.39358e-05	3.44219e-07	XP_009777968.1|0.0e+00|PREDICTED: putative chloride channel-like protein CLC-g isoform X1 [Nicotiana sylvestris]
Solyc10g083970.1	203.486	307.733	0.588143	0.0420579	0.00303193	XP_010312254.1|2.0e-229|S-adenosylmethionine synthase 3-like [Solanum lycopersicum]
Solyc09g009020.2	467.213	700.623	0.587151	1.12567e-09	1.54872e-11	NP_001234080.1|6.6e-254|enolase [Solanum lycopersicum]
Solyc01g067740.2	543.51	802.766	0.584757	5.12096e-18	3.76996e-20	NP_001234031.2|2.0e-83|superoxide dismutase [Cu-Zn] 2 [Solanum lycopersicum]
Solyc01g112070.2	20.993	31.593	0.583474	3.14302e-09	4.56445e-11	XP_004231085.1|0.0e+00|O-fucosyltransferase 6 isoform X1 [Solanum lycopersicum]
Solyc04g008940.2	18.403	27.446	0.582752	0.00112108	4.23932e-05	XP_015072112.1|3.2e-124|putative GEM-like protein 8 [Solanum pennellii]
Solyc12g042770.1	15.09	22.49	0.582363	0.00178139	7.18059e-05	XP_004252315.2|2.5e-162|uncharacterized protein LOC101260209 [Solanum lycopersicum]
Solyc12g088760.1	8.196	12.223	0.582028	0.00302187	0.000132993	XP_004252763.1|0.0e+00|subtilisin-like protease SBT1.9 isoform X1 [Solanum lycopersicum]
Solyc11g008390.1	21.793	32.156	0.580509	2.01701e-08	3.27811e-10	NP_001306052.1|0.0e+00|U-box domain-containing protein 14 [Solanum lycopersicum]
Solyc11g062100.1	11.833	17.466	0.580351	2.17165e-08	3.5469e-10	XP_015058443.1|0.0e+00|copper-transporting ATPase HMA4-like [Solanum pennellii]
Solyc03g083320.2	11.693	17.13	0.580071	0.000846652	3.07422e-05	NP_001234705.1|1.7e-116|calcium sensor calcineurin B-like [Solanum lycopersicum]
Solyc05g051220.2	6.973	10.31	0.579109	1.56752e-05	3.89703e-07	XP_004240037.1|0.0e+00|potassium channel SKOR-like [Solanum lycopersicum]
Solyc03g025490.2	11.44	17.01	0.576463	0.00645345	0.000316208	XP_004234410.1|1.0e-184|gibberellin 20-oxidase-like protein [Solanum lycopersicum]
Solyc04g074270.2	21.626	31.406	0.573659	2.91177e-10	3.74835e-12	XP_004237919.1|0.0e+00|uncharacterized protein LOC101256969 [Solanum lycopersicum]
Solyc11g066430.1	80.186	118.246	0.573258	0.000148468	4.46979e-06	NP_001296295.1|1.5e-70|histone H2B.2 [Solanum lycopersicum]
Solyc02g076830.1	16.586	24.376	0.571112	1.47017e-05	3.64318e-07	XP_004233063.1|6.6e-266|epidermis-specific secreted glycoprotein EP1-like [Solanum lycopersicum]
Solyc06g075160.2	28.66	42.12	0.570833	3.5988e-12	3.96681e-14	XP_004241276.1|0.0e+00|serine/threonine-protein phosphatase 6 regulatory subunit 3-like [Solanum lycopersicum]
Solyc08g080060.2	36.506	53.646	0.570215	5.77823e-05	1.56206e-06	XP_004245667.2|3.2e-159|expansin-A18 [Solanum lycopersicum]
Solyc03g117870.2	134.02	195.936	0.569147	3.2794e-13	3.3641e-15	NP_001333770.1|0.0e+00|4-coumarate--CoA ligase [Solanum lycopersicum]
Solyc12g096810.1	2.673	4.003	0.569075	0.015573	0.000911526	XP_010314779.1|0.0e+00|mitochondrial proton/calcium exchanger protein-like isoform X1 [Solanum lycopersicum]
Solyc05g056170.2	143.26	209.246	0.567414	8.40122e-11	1.00377e-12	XP_009759945.1|0.0e+00|PREDICTED: phenylalanine ammonia-lyase G4-like [Nicotiana sylvestris]
Solyc09g008560.2	21.226	31.126	0.567203	9.05025e-06	2.14806e-07	NP_001353341.1|7.3e-221|putative 2OG-Fe(II) oxygenase GIM2-like [Solanum lycopersicum]
Solyc07g005110.2	7.386	10.876	0.566479	0.000244303	7.82305e-06	XP_010323173.1|0.0e+00|putative cysteine-rich receptor-like protein kinase 35 isoform X2 [Solanum lycopersicum]
Solyc04g080790.2	17.066	24.933	0.565793	3.24433e-08	5.36414e-10	XP_004238265.1|0.0e+00|BEL1-like homeodomain protein 3 [Solanum lycopersicum]
Solyc12g044230.1	30.71	44.89	0.564196	3.94912e-06	8.5947e-08	XP_010314282.1|6.4e-267|sulfite exporter TauE/SafE family protein 3 isoform X1 [Solanum lycopersicum]
Solyc03g113420.2	2.98	4.473	0.56304	0.0316768	0.00214696	NP_001333239.1|0.0e+00|protein NRT1/ PTR FAMILY 2.11-like [Solanum lycopersicum]
Solyc09g008200.2	110.213	160.666	0.562438	5.74777e-15	4.99445e-17	XP_004246628.1|1.9e-222|heavy metal-associated isoprenylated plant protein 5 [Solanum lycopersicum]
Solyc12g100250.1	15.063	22.176	0.556274	0.0222933	0.00139788	XP_004252862.1|1.4e-232|delta(12)-fatty-acid desaturase FAD2 isoform X1 [Solanum lycopersicum]
Solyc09g011580.2	71.456	103.27	0.550817	2.10748e-09	3.01819e-11	XP_004246382.1|1.5e-123|probable glutathione S-transferase [Solanum lycopersicum]
Solyc00g233480.1	21.33	31.196	0.550264	0.00985839	0.000519134	XP_015076630.1|6.5e-90|ABC transporter G family member 11-like [Solanum pennellii]
Solyc04g072920.2	88.783	127.936	0.548741	3.0258e-13	3.09177e-15	XP_004237894.1|4.0e-208|probable trehalose-phosphate phosphatase J [Solanum lycopersicum]
Solyc04g025880.2	13.166	19.27	0.548625	6.71055e-06	1.53065e-07	XP_015071965.1|0.0e+00|potassium transporter 6-like [Solanum pennellii]
Solyc06g036290.2	6.996	10.15	0.548506	0.00153572	6.09148e-05	NP_001308492.1|0.0e+00|heat shock protein 90 [Solanum lycopersicum]
Solyc05g056490.2	22.84	32.983	0.547804	6.82003e-06	1.55836e-07	XP_004239634.1|7.7e-224|SAL1 phosphatase [Solanum lycopersicum]
Solyc01g104910.2	5.066	7.23	0.547746	0.00949188	0.000495634	XP_004230554.1|0.0e+00|uncharacterized protein LOC101246968 [Solanum lycopersicum]
Solyc06g061210.2	3.313	4.826	0.546351	0.0291013	0.00193634	XP_004242273.1|0.0e+00|galactoside 2-alpha-L-fucosyltransferase-like [Solanum lycopersicum]
Solyc06g005470.2	5425.71	7786.71	0.544018	9.65298e-17	7.49467e-19	Q43515.1|4.1e-21|RecName: Full=Metallothionein-like protein type 2
Solyc02g081170.2	6.606	9.62	0.542329	0.0273593	0.00179034	NP_001234183.1|1.2e-179|plastid lipid associated protein CHRC [Solanum lycopersicum]
Solyc07g006160.2	22.233	30.473	0.54221	1.86797e-07	3.35902e-09	XP_010323216.1|1.8e-290|AFG1-like ATPase isoform X1 [Solanum lycopersicum]
Solyc01g057320.1	2.76	3.966	0.541243	0.000297181	9.74345e-06	XP_010319414.1|0.0e+00|kinesin-like protein KIN-12C isoform X2 [Solanum lycopersicum]
Solyc04g050620.2	29.596	42.473	0.539667	3.4454e-07	6.51435e-09	XP_004237505.1|3.9e-290|cytochrome P450 CYP736A12 [Solanum lycopersicum]
Solyc02g065780.1	87.53	126.143	0.536922	0.00228985	9.62627e-05	XP_010317137.1|1.7e-52|protein RALF-like 27 [Solanum lycopersicum]
Solyc02g080450.1	55.233	79.803	0.536849	0.0120571	0.00066596	PHT90722.1|1.3e-46|hypothetical protein T459_05835 [Capsicum annuum]
Solyc02g078150.2	16.163	23.24	0.535087	0.00116379	4.43831e-05	XP_015064173.1|5.5e-182|uncharacterized protein LOC107009366 [Solanum pennellii]
Solyc05g008200.2	44.763	63.826	0.533736	1.14619e-12	1.21729e-14	XP_010320710.1|0.0e+00|putative 1-phosphatidylinositol-3-phosphate 5-kinase FAB1C [Solanum lycopersicum]
Solyc11g013120.1	11.076	15.923	0.533661	0.00216612	8.99281e-05	XP_004250332.1|2.4e-263|uncharacterized protein LOC101250564 [Solanum lycopersicum]
Solyc04g054690.2	86.4	123	0.532563	2.74849e-14	2.58728e-16	NP_001234829.2|0.0e+00|ascorbate oxidase precursor [Solanum lycopersicum]
Solyc06g069570.2	76.503	111.04	0.531467	3.42666e-12	3.76329e-14	XP_010322574.1|1.1e-172|SNAP25 homologous protein SNAP33 [Solanum lycopersicum]
Solyc09g007930.2	268.603	385.29	0.531312	4.1642e-05	1.09558e-06	XP_015087665.1|1.8e-20|phenylalanine ammonia-lyase-like [Solanum pennellii]
Solyc12g096630.1	15.163	20.52	0.530643	0.000140801	4.20283e-06	XP_004253041.1|1.1e-89|probable uridine nucleosidase 2 isoform X1 [Solanum lycopersicum]
Solyc11g069560.1	9.04	12.896	0.528861	9.65567e-05	2.7773e-06	XP_004251147.1|0.0e+00|uncharacterized protein LOC101262484 [Solanum lycopersicum]
Solyc07g066020.2	7.46	10.94	0.527932	0.00469135	0.000221564	PHT44068.1|3.3e-243|putative amino acid permease 7 [Capsicum baccatum]
Solyc02g067860.2	15.876	22.39	0.525563	0.000114757	3.3562e-06	XP_006357162.1|9.4e-169|PREDICTED: putative glucose-6-phosphate 1-epimerase [Solanum tuberosum]
Solyc04g007650.2	8.336	11.84	0.524634	1.16927e-06	2.38482e-08	XP_010319394.1|0.0e+00|putative 1-phosphatidylinositol-3-phosphate 5-kinase FAB1C [Solanum lycopersicum]
Solyc12g056930.1	3.986	6.166	0.524487	0.00754078	0.000379193	XP_006360279.1|0.0e+00|PREDICTED: sulfate transporter 1.2-like [Solanum tuberosum]
Solyc02g064800.2	13.213	18.673	0.524051	0.000105097	3.04832e-06	XP_004233447.1|0.0e+00|uncharacterized protein LOC101268835 isoform X1 [Solanum lycopersicum]
BGI_novel_G000571	22.636	32.27	0.523577	0.00208479	8.59645e-05
Solyc08g082860.2	9.513	13.506	0.521687	0.000256284	8.22732e-06	XP_004245478.1|0.0e+00|probable trehalase isoform X2 [Solanum lycopersicum]
Solyc05g054820.1	7.106	10.12	0.52104	0.00426179	0.000198877	XP_004240195.2|0.0e+00|exocyst complex component EXO70H1 [Solanum lycopersicum]
Solyc06g067890.2	14.61	20.67	0.51891	7.25598e-06	1.66965e-07	XP_004241714.1|0.0e+00|uncharacterized protein LOC101268405 [Solanum lycopersicum]
Solyc04g079240.2	6.693	9.573	0.518219	0.0428685	0.00311796	XP_015072977.1|2.9e-232|patatin-like protein 2 [Solanum pennellii]
Solyc08g079060.2	19.236	26.976	0.516577	0.000990976	3.68756e-05	XP_004245739.1|7.5e-222|probable trehalose-phosphate phosphatase F [Solanum lycopersicum]
Solyc02g091140.2	8.016	11.386	0.514698	0.0128112	0.000717403	XP_004232014.1|4.3e-213|probable S-adenosylmethionine-dependent methyltransferase At5g38780 [Solanum lycopersicum]
Solyc08g076880.2	66.843	94.296	0.514326	1.09505e-05	2.64313e-07	XP_004245899.1|4.9e-73|uncharacterized protein LOC101244894 [Solanum lycopersicum]
Solyc02g092810.2	19.75	27.97	0.513505	0.00027425	8.85922e-06	XP_004231892.1|6.5e-95|death-associated inhibitor of apoptosis 1 [Solanum lycopersicum]
Solyc11g012930.1	203.856	286.176	0.513119	6.17309e-11	7.32586e-13	XP_019066706.1|5.0e-206|WAT1-related protein At4g08300 [Solanum lycopersicum]
Solyc09g066290.2	3.43	4.88	0.511716	0.0411564	0.00294873	XP_004247232.1|0.0e+00|protein KINESIN LIGHT CHAIN-RELATED 1 [Solanum lycopersicum]
Solyc02g088500.1	8.426	11.923	0.510169	0.0108118	0.000581952	XP_004233671.1|6.8e-269|UDP-glycosyltransferase 13-like [Solanum lycopersicum]
Solyc04g079420.2	6.586	9.283	0.510081	0.000753739	2.68348e-05	XP_004238189.1|0.0e+00|probable disease resistance protein At4g33300 [Solanum lycopersicum]
Solyc09g075330.2	43.296	60.76	0.510012	9.30827e-09	1.45664e-10	XP_004247401.1|0.0e+00|probable pectinesterase/pectinesterase inhibitor 7 [Solanum lycopersicum]
Solyc01g096620.2	7.096	10.053	0.509399	0.00930086	0.000483788	XP_015164385.1|5.0e-103|PREDICTED: uncharacterized protein LOC102590196 isoform X2 [Solanum tuberosum]
Solyc03g113070.2	16.64	23.243	0.508898	1.14275e-06	2.32614e-08	XP_009759241.1|0.0e+00|PREDICTED: ABC transporter A family member 2 [Nicotiana sylvestris]
Solyc07g043390.2	42.593	59.926	0.508792	0.000687116	2.42673e-05	XP_004243640.1|2.3e-259|cellulose synthase-like protein G2 [Solanum lycopersicum]
Solyc11g042460.1	8.02	11.106	0.508724	5.44263e-05	1.46477e-06	XP_015166880.1|0.0e+00|PREDICTED: non-lysosomal glucosylceramidase isoform X2 [Solanum tuberosum]
Solyc01g094260.2	10.55	14.896	0.508363	0.01377	0.000783836	XP_019071554.1|3.0e-177|(+)-neomenthol dehydrogenase-like [Solanum lycopersicum]
Solyc09g065030.2	8.383	11.823	0.508331	0.00328387	0.000147165	XP_004247157.1|1.1e-282|protein trichome birefringence-like 11 [Solanum lycopersicum]
Solyc04g079720.2	30.74	42.986	0.504751	7.05543e-08	1.19714e-09	XP_004238204.1|1.5e-270|fatty alcohol:caffeoyl-CoA acyltransferase [Solanum lycopersicum]
Solyc02g091930.2	84.546	118.12	0.503242	1.80194e-09	2.55537e-11	XP_004231956.1|1.5e-150|homeobox-leucine zipper protein HAT22 [Solanum lycopersicum]
Solyc02g080910.2	12.163	18.653	0.502403	0.00526465	0.000253088	PHT90798.1|0.0e+00|putative pectate lyase 16 [Capsicum annuum]
Solyc07g018140.2	38.196	53.31	0.500056	1.25071e-06	2.56603e-08	XP_004242921.1|4.0e-224|probable receptor-like serine/threonine-protein kinase At5g57670 [Solanum lycopersicum]
Solyc01g060050.1	3.773	5.286	0.499616	0.00286486	0.000125095	XP_010318937.1|0.0e+00|bromodomain and WD repeat-containing protein 3 [Solanum lycopersicum]
Solyc02g081190.2	258.103	359.516	0.49867	4.27243e-07	8.12961e-09	NP_001233867.2|4.3e-185|1-aminocyclopropane-1-carboxylate oxidase [Solanum lycopersicum]
Solyc10g081440.1	171.88	239.03	0.496737	5.61987e-08	9.45011e-10	XP_004249368.1|3.1e-160|NADH--cytochrome b5 reductase 1 [Solanum lycopersicum]
Solyc10g005510.2	172.4	239.4	0.494868	2.13995e-07	3.91696e-09	XP_004248314.1|2.2e-237|glyceraldehyde-3-phosphate dehydrogenase GAPCP1, chloroplastic [Solanum lycopersicum]
Solyc06g068540.2	11.36	15.83	0.493807	0.0010528	3.96421e-05	XP_004241674.1|1.0e-307|uncharacterized protein LOC101256298 isoform X1 [Solanum lycopersicum]
Solyc07g065090.1	28.506	39.65	0.491309	0.000423464	1.43437e-05	AAA53547.1|9.9e-190|polygalacturonase inhibitor protein [Solanum lycopersicum]
Solyc08g016080.2	13.913	19.27	0.48861	4.91968e-05	1.31215e-06	XP_004244793.1|0.0e+00|uncharacterized protein LOC101263137 [Solanum lycopersicum]
Solyc01g104050.2	9.816	13.596	0.486826	0.000449511	1.52575e-05	XP_004230487.1|0.0e+00|probable receptor-like protein kinase At1g11050 [Solanum lycopersicum]
Solyc07g019440.2	25.143	34.726	0.485269	2.38216e-05	6.07567e-07	XP_011074558.1|4.1e-238|glucose-1-phosphate adenylyltransferase large subunit 2, chloroplastic/amyloplastic-like [Sesamum indicum]
Solyc03g007550.2	4.516	5.146	0.484765	0.000251836	8.07439e-06	XP_004234279.1|0.0e+00|uncharacterized protein LOC101257240 [Solanum lycopersicum]
Solyc01g094890.2	17.316	23.943	0.484664	0.000399723	1.34592e-05	XP_004229896.2|0.0e+00|ferric reduction oxidase 2 [Solanum lycopersicum]
Solyc05g006750.2	80.813	111.433	0.481346	0.000295257	9.65826e-06	XP_004238745.1|1.6e-128|glutathione S-transferase U17 [Solanum lycopersicum]
Solyc09g007900.2	29.42	40.64	0.479577	0.00326723	0.000146288	AXY78876.1|0.0e+00|phenylalanine ammonia-lyase [Solanum tuberosum]
Solyc02g014190.2	3.97	5.46	0.478215	0.00573913	0.000278206	XP_010315556.1|0.0e+00|sacsin isoform X1 [Solanum lycopersicum]
Solyc09g089680.2	92.21	126.686	0.477824	3.74499e-06	8.12032e-08	XP_004247710.1|1.2e-217|1-aminocyclopropane-1-carboxylate oxidase homolog [Solanum lycopersicum]
Solyc01g067860.2	65.94	90.67	0.476105	0.000335791	1.10769e-05	XP_010320973.2|6.1e-187|uncharacterized protein LOC101247458 [Solanum lycopersicum]
Solyc03g007760.2	71.26	97.533	0.474092	4.96397e-08	8.3272e-10	XP_004234206.1|0.0e+00|uncharacterized protein LOC101260609 [Solanum lycopersicum]
Solyc06g007930.2	44.04	60.353	0.472508	0.000285594	9.27164e-06	XP_004240459.1|3.0e-72|cytochrome b5 [Solanum lycopersicum]
Solyc07g008280.2	30.216	41.506	0.471654	0.00273621	0.000118439	XP_004242784.1|2.3e-74|uncharacterized protein LOC101249561 [Solanum lycopersicum]
Solyc11g008200.1	16.573	22.71	0.471226	0.00110466	4.17281e-05	XP_004250040.1|0.0e+00|protein NUCLEAR FUSION DEFECTIVE 4-like [Solanum lycopersicum]
Solyc03g007570.2	112.713	153.743	0.471111	3.87399e-09	5.67933e-11	XP_004234192.1|3.1e-275|DUF21 domain-containing protein At5g52790 [Solanum lycopersicum]
Solyc04g072640.2	35.393	47.453	0.470662	6.90455e-05	1.8971e-06	XP_004237877.1|3.9e-60|membrane-anchored ubiquitin-fold protein 3 isoform X3 [Solanum lycopersicum]
Solyc03g006860.2	19.65	27.946	0.470466	0.000113894	3.32637e-06	NP_001233893.1|4.7e-194|fructokinase [Solanum lycopersicum]
Solyc00g140060.2	31.013	42.52	0.469851	0.00734908	0.000368075	XP_004253466.2|5.7e-122|tripeptidyl-peptidase 2-like [Solanum lycopersicum]
Solyc01g095070.2	72.496	98.926	0.469374	2.65484e-07	4.93418e-09	XP_004229951.1|2.3e-121|heavy metal-associated isoprenylated plant protein 39 [Solanum lycopersicum]
Solyc11g056620.1	7.166	9.823	0.468249	0.0101194	0.000535192	XP_004250856.1|6.8e-138|uncharacterized protein LOC101262986 [Solanum lycopersicum]
Solyc09g059430.2	24.616	33.626	0.468133	0.00118263	4.54346e-05	XP_010326285.1|1.2e-153|RPM1-interacting protein 4 isoform X2 [Solanum lycopersicum]
Solyc12g008970.1	8.53	11.33	0.467785	0.0051549	0.00024719	XP_004251677.1|4.1e-274|diacylglycerol O-acyltransferase 1A isoform X1 [Solanum lycopersicum]
Solyc11g045160.1	3.836	5.253	0.467636	0.00470632	0.000222461	XP_010313100.1|0.0e+00|uncharacterized protein LOC101246789 isoform X1 [Solanum lycopersicum]
Solyc11g008540.1	8.853	11.986	0.465796	0.000150689	4.54649e-06	XP_015058485.1|0.0e+00|endoribonuclease Dicer homolog 2-like [Solanum pennellii]
Solyc02g079510.2	32.086	43.823	0.465684	0.00135995	5.33958e-05	NP_001295320.1|3.5e-203|suberization-associated anionic peroxidase 2 precursor [Solanum lycopersicum]
Solyc01g066970.2	126.153	172.413	0.465372	0.000394699	1.32741e-05	XP_004229231.1|2.6e-55|flowering-promoting factor 1-like protein 3 [Solanum lycopersicum]
Solyc03g114780.2	2.443	3.48	0.464971	0.0452663	0.00334517	XP_010318874.1|0.0e+00|uncharacterized protein LOC101244477 isoform X4 [Solanum lycopersicum]
Solyc09g064940.2	61.853	84.196	0.464086	4.92e-05	1.31422e-06	XP_010326359.1|1.8e-169|uncharacterized protein LOC101252813 isoform X1 [Solanum lycopersicum]
Solyc02g078570.2	26.21	35.653	0.462607	0.000207984	6.54291e-06	XP_004232842.1|1.4e-179|uncharacterized protein LOC101265883 [Solanum lycopersicum]
Solyc12g098100.1	3.64	4.983	0.461551	0.0472937	0.00352733	XP_019066855.1|0.0e+00|probable leucine-rich repeat receptor-like protein kinase At5g63930 [Solanum lycopersicum]
Solyc01g105210.2	9.256	12.626	0.459918	0.034286	0.00238063	XP_004231350.2|1.5e-105|protein DA1-related 1-like [Solanum lycopersicum]
Solyc08g081180.2	38.2	51.76	0.459085	4.56306e-06	1.00029e-07	XP_004245597.1|0.0e+00|signal peptide peptidase-like 2 isoform X2 [Solanum lycopersicum]
Solyc08g076630.1	13.306	18.106	0.458953	0.00677469	0.000334674	XP_004246189.2|1.0e-258|basic 7S globulin-like [Solanum lycopersicum]
Solyc01g104500.2	49.36	66.89	0.454795	1.03731e-05	2.4829e-07	XP_019067370.1|1.6e-88|uncharacterized protein LOC101262665 isoform X2 [Solanum lycopersicum]
Solyc08g061610.2	14.81	19.99	0.453401	7.79553e-06	1.80949e-07	XP_004245045.1|0.0e+00|copper-transporting ATPase PAA2, chloroplastic [Solanum lycopersicum]
Solyc11g062410.1	21.093	28.843	0.452942	1.29909e-05	3.18789e-07	XP_004250885.1|9.9e-254|CBL-interacting serine/threonine-protein kinase 3 [Solanum lycopersicum]
Solyc08g007190.2	10.536	14.283	0.452772	0.0134374	0.000759495	XP_004244556.1|0.0e+00|GATA transcription factor 26-like [Solanum lycopersicum]
Solyc09g090070.1	431.49	581.416	0.452489	1.54552e-08	2.47452e-10	NP_001234361.2|0.0e+00|phosphate transporter 1 [Solanum lycopersicum]
Solyc10g018200.1	31.97	43.246	0.451579	0.0119362	0.000657362	XP_004248616.1|2.7e-122|uncharacterized protein LOC101252333 [Solanum lycopersicum]
Solyc03g059310.2	33.793	45.606	0.450495	7.52365e-05	2.08839e-06	XP_004234794.1|1.1e-138|protein LST8 homolog [Solanum lycopersicum]
Solyc01g103510.2	33.81	45.603	0.450461	0.000159473	4.85643e-06	XP_004230449.1|1.0e-228|60S ribosomal protein L3-2 [Solanum lycopersicum]
Solyc05g012510.2	7.35	9.93	0.450223	0.00377016	0.000173356	NP_001275128.1|0.0e+00|alpha-1,4 glucan phosphorylase L-2 isozyme, chloroplastic/amyloplastic [Solanum tuberosum]
Solyc05g014980.2	88.513	119.143	0.449942	4.89665e-06	1.08145e-07	XP_004239196.1|1.2e-133|adenylate kinase 4 [Solanum lycopersicum]
Solyc06g071550.2	31.893	42.933	0.449629	5.42392e-06	1.20444e-07	XP_004241508.1|3.8e-223|anthranilate phosphoribosyltransferase, chloroplastic [Solanum lycopersicum]
Solyc07g053710.2	16.54	22.32	0.449432	0.000937371	3.473e-05	XP_004243374.1|2.0e-245|tyrosine aminotransferase-like [Solanum lycopersicum]
Solyc02g069690.1	44.143	59.463	0.448896	0.000736055	2.61756e-05	XP_004233182.1|0.0e+00|berberine bridge enzyme-like 15 [Solanum lycopersicum]
Solyc06g008230.2	6.02	8.126	0.447023	0.00956188	0.000501212	XP_006364568.1|0.0e+00|PREDICTED: tetratricopeptide repeat protein 7A-like isoform X1 [Solanum tuberosum]
Solyc02g090450.2	102.26	137.593	0.446991	6.7153e-05	1.8397e-06	XP_004233638.1|3.0e-191|peroxidase 10-like [Solanum lycopersicum]
Solyc04g009790.2	11.263	12.603	0.44653	0.00166957	6.68206e-05	XP_004236801.1|0.0e+00|uncharacterized protein LOC101251972 [Solanum lycopersicum]
Solyc09g072810.2	5.196	7.013	0.444592	0.0195058	0.00119351	XP_004247501.1|0.0e+00|MDIS1-interacting receptor like kinase 2-like [Solanum lycopersicum]
Solyc01g110290.2	25.813	34.626	0.444224	9.19404e-05	2.63342e-06	BAA82093.1|7.0e-236|squalene synthase [Solanum tuberosum]
Solyc02g080480.2	8.073	10.856	0.441342	0.0174944	0.00104792	XP_009614256.1|4.6e-257|PREDICTED: LOW QUALITY PROTEIN: protein DETOXIFICATION 40 [Nicotiana tomentosiformis]
Solyc05g006740.2	13.166	17.866	0.440901	0.0343279	0.00238825	XP_010320650.1|2.1e-131|glutathione S-transferase U17 isoform X1 [Solanum lycopersicum]
Solyc11g007590.1	15.67	21.083	0.440009	0.0249564	0.00160533	XP_004250001.1|3.2e-199|uncharacterized protein LOC101253339 [Solanum lycopersicum]
Solyc02g091210.1	46.05	61.77	0.438173	1.1623e-05	2.82416e-07	XP_004232011.1|5.4e-255|eukaryotic translation initiation factor 5 [Solanum lycopersicum]
Solyc02g082850.2	17.33	23.196	0.436868	0.0108754	0.000586252	XP_004232554.1|8.6e-203|serine acetyltransferase 2 [Solanum lycopersicum]
Solyc08g068290.2	52.673	70.216	0.436141	2.24578e-05	5.70074e-07	XP_004245262.1|3.1e-273|sulfite exporter TauE/SafE family protein 3-like [Solanum lycopersicum]
Solyc10g055650.1	76.163	99.256	0.43482	9.77533e-09	1.53366e-10	XP_009595549.1|3.4e-177|PREDICTED: probable protein phosphatase 2C 46 [Nicotiana tomentosiformis]
Solyc09g092410.2	17.096	22.77	0.431925	0.000412193	1.39454e-05	XP_025888731.1|0.0e+00|LOW QUALITY PROTEIN: disease resistance protein TAO1 [Solanum lycopersicum]
Solyc05g011970.2	54.563	72.47	0.431062	2.02574e-06	4.27835e-08	XP_004239025.1|1.3e-304|cytochrome P450 CYP749A22-like isoform X1 [Solanum lycopersicum]
Solyc12g006460.1	15.513	20.64	0.429797	0.00441608	0.000206609	NP_001352903.1|2.2e-286|GLYCOALKALOID METABOLISM 4 [Solanum lycopersicum]
Solyc12g062940.1	10.913	14.67	0.429703	0.0137142	0.000780109	XP_025884525.1|4.0e-266|probable glycosyltransferase At5g03795 [Solanum lycopersicum]
Solyc01g099970.2	7.893	10.453	0.428149	0.00150912	5.96775e-05	XP_010313225.1|0.0e+00|F-box/LRR-repeat protein 3 [Solanum lycopersicum]
Solyc07g064290.2	36.403	48.12	0.422821	8.7152e-05	2.47173e-06	XP_004244140.1|2.3e-165|septum-promoting GTP-binding protein 1 [Solanum lycopersicum]
Solyc06g005800.2	26.113	34.213	0.420174	0.000820426	2.9539e-05	XP_016575831.1|5.5e-183|PREDICTED: serine/threonine-protein phosphatase PP1 isozyme 1 isoform X1 [Capsicum annuum]
Solyc01g073640.2	34.153	45.06	0.419028	0.00227407	9.53246e-05	NP_001233856.1|6.9e-138|yfe37 protein [Solanum lycopersicum]
Solyc01g103050.2	55.056	72.503	0.418796	6.2277e-06	1.413e-07	NP_001234871.2|0.0e+00|auxin response factor 1 [Solanum lycopersicum]
Solyc10g086190.1	323.793	425.646	0.416097	0.000106814	3.1067e-06	XP_004249586.1|3.3e-196|adenosine kinase 2 [Solanum lycopersicum]
Solyc04g072160.2	31.3	41.186	0.414732	0.00253721	0.000108805	NP_001234685.2|6.8e-100|ripening regulated protein DDTFR8 [Solanum lycopersicum]
Solyc05g015480.2	9.933	13.306	0.414633	0.0474686	0.00354497	XP_004239213.1|1.2e-198|uncharacterized protein LOC101244665 [Solanum lycopersicum]
Solyc08g078460.2	60.29	79.793	0.413842	2.16739e-05	5.4843e-07	XP_004245781.1|3.1e-216|uncharacterized protein LOC101260461 [Solanum lycopersicum]
Solyc07g055810.2	6.623	8.71	0.413162	0.00592913	0.000288371	XP_004243241.1|0.0e+00|probable LRR receptor-like serine/threonine-protein kinase At1g07650 [Solanum lycopersicum]
Solyc07g042550.2	450.533	589.563	0.412152	8.5366e-10	1.14014e-11	XP_019227610.1|0.0e+00|PREDICTED: sucrose synthase [Nicotiana attenuata]
Solyc05g009150.2	12.003	15.75	0.411401	0.000495966	1.69592e-05	XP_004238914.1|0.0e+00|zinc finger protein BRUTUS-like [Solanum lycopersicum]
Solyc09g014720.1	14.966	19.636	0.411173	0.00126712	4.91901e-05	XP_004246830.2|0.0e+00|wall-associated receptor kinase 2-like [Solanum lycopersicum]
Solyc03g093410.2	46.383	60.836	0.410961	0.000337902	1.11873e-05	PHU22776.1|4.5e-270|Hexose carrier protein HEX6 [Capsicum chinense]
Solyc07g005930.2	9.04	11.863	0.410895	0.000909504	3.33152e-05	XP_004242994.1|0.0e+00|DNA-directed RNA polymerase 3, chloroplastic [Solanum lycopersicum]
Solyc07g055350.2	31.74	41.623	0.410287	0.00134166	5.25156e-05	XP_006348901.1|5.0e-287|PREDICTED: cytochrome P450 CYP72A219-like isoform X1 [Solanum tuberosum]
Solyc12g099000.1	111.26	145.603	0.409285	0.000318389	1.04772e-05	NP_001296305.1|1.9e-232|S-adenosylmethionine synthase 2 [Solanum lycopersicum]
Solyc04g049720.2	20.933	27.383	0.40838	0.00017141	5.2642e-06	XP_004237529.1|0.0e+00|leucine aminopeptidase [Solanum lycopersicum]
Solyc10g080560.1	22.39	29.403	0.408037	0.0218491	0.00136684	XP_004249291.1|3.9e-166|DNA-3-methyladenine glycosylase isoform X1 [Solanum lycopersicum]
Solyc09g075890.2	167.423	218.893	0.406055	0.000775864	2.76849e-05	XP_004247365.1|2.6e-140|uncharacterized protein LOC101255829 [Solanum lycopersicum]
Solyc11g011330.1	36.39	47.583	0.405539	0.00253092	0.000108433	XP_004250191.1|2.3e-208|8-hydroxygeraniol dehydrogenase [Solanum lycopersicum]
Solyc08g042130.2	12.24	15.986	0.40529	0.00166833	6.65775e-05	XP_004244951.1|0.0e+00|PX domain-containing protein EREL2 isoform X1 [Solanum lycopersicum]
Solyc02g088180.2	25.496	33.39	0.40351	0.028298	0.00187265	NP_001316319.1|1.9e-191|NAC2-domain containing protein [Solanum lycopersicum]
Solyc03g118540.2	31.89	41.363	0.403049	0.000287461	9.35538e-06	XP_010318655.1|2.4e-180|protein TIFY 6B isoform X3 [Solanum lycopersicum]
Solyc02g083730.2	30.696	40.083	0.402283	0.00760578	0.000382767	XP_004232500.1|2.6e-68|thiosulfate sulfurtransferase 18 isoform X2 [Solanum lycopersicum]
Solyc08g007430.1	657.62	855.826	0.400524	0.000231275	7.35933e-06	XP_004244572.1|0.0e+00|protein NRT1/ PTR FAMILY 6.3 [Solanum lycopersicum]
Solyc04g014270.2	20.793	27.06	0.399795	0.000976322	3.62517e-05	XP_004236699.1|0.0e+00|ATP-dependent 6-phosphofructokinase 5, chloroplastic-like [Solanum lycopersicum]
Solyc04g074770.2	28.51	37.086	0.397635	0.0187022	0.0011323	XP_006363309.1|3.6e-100|PREDICTED: uncharacterized protein LOC102591088 [Solanum tuberosum]
Solyc04g081440.2	433.4	562.256	0.397062	2.50059e-05	6.39785e-07	XP_015073496.1|0.0e+00|probable alkaline/neutral invertase D [Solanum pennellii]
Solyc06g082710.2	15.373	20.006	0.396635	0.0340206	0.0023581	XP_004242461.1|1.8e-164|KH domain-containing protein At3g08620 [Solanum lycopersicum]
Solyc01g079450.2	49.81	64.51	0.396181	9.3769e-07	1.89364e-08	XP_004229392.1|0.0e+00|probable glutamyl endopeptidase, chloroplastic [Solanum lycopersicum]
Solyc01g006890.2	21.986	28.5	0.395425	0.000208461	6.58308e-06	XP_004228605.1|0.0e+00|uncharacterized protein LOC101267436 isoform X2 [Solanum lycopersicum]
Solyc08g022210.2	76.213	98.696	0.395395	9.714e-07	1.96802e-08	XP_004244859.1|3.6e-205|methylthioribose-1-phosphate isomerase [Solanum lycopersicum]
Solyc07g043560.2	32.32	41.833	0.394136	0.00017141	5.26822e-06	XP_004243633.1|0.0e+00|heat shock 70 kDa protein 17 [Solanum lycopersicum]
Solyc09g075020.2	9.283	11.976	0.393993	0.00200858	8.25797e-05	XP_016556186.1|0.0e+00|PREDICTED: ABC transporter C family member 14 [Capsicum annuum]
Solyc03g097020.2	14.83	19.196	0.393206	0.00672746	0.00033207	NP_001333796.1|0.0e+00|AAA-type ATPase family protein [Solanum lycopersicum]
Solyc02g071560.2	22.953	29.733	0.392955	0.00133576	5.22309e-05	XP_004232982.1|0.0e+00|subtilisin-like protease SBT5.6 [Solanum lycopersicum]
Solyc04g057930.2	7.266	9.43	0.392437	0.0219061	0.00137211	XP_004237363.1|0.0e+00|probable receptor-like serine/threonine-protein kinase At5g57670 [Solanum lycopersicum]
Solyc03g025800.2	31.956	41.48	0.392065	0.0439405	0.00321891	XP_010317603.3|2.7e-40|LOW QUALITY PROTEIN: heavy metal-associated isoprenylated plant protein 39 [Solanum lycopersicum]
Solyc10g080980.1	17.55	22.753	0.391808	0.0173588	0.0010384	XP_004249326.1|2.3e-214|WAT1-related protein At5g07050 [Solanum lycopersicum]
Solyc11g039880.1	7.25	9.28	0.390944	0.00179429	7.26147e-05	XP_010313026.1|0.0e+00|uncharacterized protein LOC101245721 isoform X4 [Solanum lycopersicum]
Solyc01g060130.2	23.13	29.933	0.389389	0.0194161	0.00118412	NP_001234640.1|1.2e-107|GTP-binding protein SAR2 [Solanum lycopersicum]
Solyc02g065680.2	35.996	46.993	0.389382	0.000272366	8.76551e-06	XP_009759063.1|3.4e-230|PREDICTED: probable sodium-coupled neutral amino acid transporter 6 [Nicotiana sylvestris]
Solyc04g072260.1	3.436	4.46	0.388997	0.0226375	0.00142338	XP_010320130.1|0.0e+00|midasin isoform X2 [Solanum lycopersicum]
Solyc09g091950.1	36.28	46.816	0.388884	0.000685728	2.41209e-05	XP_004247959.1|8.6e-239|ethylene-responsive transcription factor ERF062 [Solanum lycopersicum]
Solyc02g092590.2	27.04	33.916	0.388482	0.0027958	0.000121469	XP_004231907.1|4.4e-117|uncharacterized protein LOC101256933 [Solanum lycopersicum]
Solyc08g075320.2	26.353	34.036	0.387681	0.00653812	0.000320883	XP_004246018.1|3.8e-270|abscisic acid 8'-hydroxylase 1 [Solanum lycopersicum]
Solyc06g008400.1	11.203	14.43	0.386092	0.00101286	3.78528e-05	NP_001318028.1|0.0e+00|NBS-LRR resistance protein-like protein [Solanum lycopersicum]
Solyc07g005400.2	40.986	52.803	0.385973	0.00136526	5.3768e-05	XP_004242577.1|6.5e-253|transcription factor bHLH82-like [Solanum lycopersicum]
Solyc09g010360.2	15.33	19.996	0.384762	0.00737474	0.000369657	XP_004246473.1|4.4e-209|WAT1-related protein At2g37460 [Solanum lycopersicum]
Solyc04g074510.2	214.246	275.483	0.38465	0.000177085	5.46542e-06	BAV67091.1|3.2e-130|14-3-3 protein [Solanum tuberosum]
Solyc04g082830.2	6.62	8.486	0.384646	0.0202573	0.00124683	XP_004238466.1|8.9e-227|protein PIN-LIKES 1 isoform X1 [Solanum lycopersicum]
Solyc08g067610.2	20.323	26.163	0.384194	0.00193334	7.89422e-05	XP_015083661.1|0.0e+00|pleiotropic drug resistance protein 1-like [Solanum pennellii]
Solyc07g008150.2	18.23	23.506	0.384022	0.0178844	0.00107559	NP_001274810.1|3.0e-202|glucan endo-1,3-beta-glucosidase 11-like precursor [Solanum tuberosum]
Solyc02g093690.2	18.05	23.24	0.383331	0.0100581	0.000530741	XP_004231819.1|1.1e-189|ATP synthase mitochondrial F1 complex assembly factor 2 [Solanum lycopersicum]
Solyc07g052470.2	15.206	19.093	0.382851	0.0415013	0.00297678	XP_010323814.1|7.2e-165|syntaxin-132 isoform X2 [Solanum lycopersicum]
Solyc02g062700.2	16.98	21.826	0.382186	0.00683196	0.000338328	XP_004233520.1|0.0e+00|ATPase family AAA domain-containing protein 3C [Solanum lycopersicum]
Solyc03g097680.2	72.36	92.756	0.380565	6.15985e-05	1.67266e-06	XP_004235365.1|3.3e-205|pyruvate dehydrogenase E1 component subunit beta-1, mitochondrial [Solanum lycopersicum]
Solyc10g078590.1	36.186	46.606	0.380163	0.0327376	0.00224414	XP_004249151.1|9.3e-140|uncharacterized protein LOC101247272 [Solanum lycopersicum]
Solyc03g112100.2	390.97	501.383	0.380066	0.000118291	3.47384e-06	XP_010319027.1|1.3e-111|high-affinity nitrate transporter 3.2 [Solanum lycopersicum]
Solyc01g110110.2	19.81	25.283	0.378625	0.017239	0.00102915	XP_004230928.1|1.9e-218|cysteine protease RD19A [Solanum lycopersicum]
Solyc08g008410.2	33.223	42.53	0.378606	1.12395e-05	2.72193e-07	XP_004244640.1|0.0e+00|protein NLP6-like isoform X1 [Solanum lycopersicum]
Solyc07g049660.2	28.96	37.18	0.378424	0.0108597	0.000584967	XP_004243496.2|3.8e-284|benzyl alcohol O-benzoyltransferase [Solanum lycopersicum]
Solyc11g066390.1	154.603	197.773	0.376783	0.00350932	0.000158963	NP_001234769.2|1.9e-120|superoxide dismutase [Cu-Zn], chloroplastic [Solanum lycopersicum]
Solyc06g083030.2	36.866	47.133	0.374658	0.00992306	0.000522939	XP_015077397.1|1.0e-298|serine carboxypeptidase 1-like [Solanum pennellii]
BGI_novel_G000072	7.213	9.24	0.373689	0.0397751	0.00283537
Solyc08g075570.2	9.103	11.636	0.372343	0.0177552	0.0010664	XP_004245999.1|0.0e+00|urea-proton symporter DUR3 [Solanum lycopersicum]
Solyc09g014320.2	19.12	24.423	0.371747	0.0207526	0.00128733	XP_004246334.1|8.2e-182|putative tRNA (cytidine(32)/guanosine(34)-2'-O)-methyltransferase [Solanum lycopersicum]
Solyc03g116530.2	56.506	72.213	0.371551	0.0176722	0.0010607	XP_004236038.1|1.6e-98|uncharacterized protein LOC101250492 [Solanum lycopersicum]
Solyc09g011590.2	45.363	57.796	0.368965	0.00340046	0.000153211	XP_004246381.1|1.6e-122|probable glutathione S-transferase [Solanum lycopersicum]
Solyc06g009020.2	331.87	423.84	0.368724	0.00079492	2.84982e-05	XP_004240536.1|2.3e-117|glutathione S-transferase [Solanum lycopersicum]
Solyc04g051860.2	32.536	40.34	0.368717	0.00134462	5.26857e-05	NP_001234112.1|1.1e-167|shikimate kinase, chloroplastic [Solanum lycopersicum]
Solyc06g074110.2	22.383	28.456	0.368715	7.7671e-05	2.16221e-06	XP_004242114.1|0.0e+00|transcription factor LHW isoform X1 [Solanum lycopersicum]
Solyc01g110540.2	331.633	421.803	0.368031	0.00280192	0.000121847	OIT29870.1|2.4e-24|hypothetical protein A4A49_49667 [Nicotiana attenuata]
Solyc08g082820.2	141.973	180.433	0.36743	0.00316862	0.000141108	NP_001234636.2|0.0e+00|luminal-binding protein precursor [Solanum lycopersicum]
Solyc09g010940.2	45.383	57.66	0.366677	0.00136959	5.39946e-05	XP_004246419.1|3.5e-155|uncharacterized protein LOC101251913 [Solanum lycopersicum]
Solyc08g076860.2	128.05	162.476	0.364686	0.000221035	6.98903e-06	XP_015083190.1|1.9e-143|uncharacterized protein LOC107026660 [Solanum pennellii]
Solyc08g006420.2	7.45	9.436	0.364023	0.00194504	7.95764e-05	XP_010324541.1|0.0e+00|golgin subfamily A member 4 isoform X4 [Solanum lycopersicum]
Solyc01g080640.2	24.136	30.566	0.363742	1.634e-05	4.07547e-07	XP_006356990.1|0.0e+00|PREDICTED: ABC transporter C family member 14-like [Solanum tuberosum]
Solyc11g070130.1	289.246	378.986	0.36324	0.000197603	6.18452e-06	NP_001234138.1|8.3e-71|profilin [Solanum lycopersicum]
Solyc06g006080.2	19.27	24.493	0.362415	0.0437589	0.00320209	NP_001304334.1|0.0e+00|thiamine biosynthesis protein ThiC [Solanum lycopersicum]
Solyc02g090820.2	47.653	60.336	0.361969	0.000556512	1.9231e-05	NP_001308379.1|2.6e-171|heat shock factor protein HSF24 [Solanum lycopersicum]
Solyc05g006640.2	13.466	17.04	0.361154	0.000935166	3.45731e-05	XP_004238741.1|0.0e+00|phospholipid-transporting ATPase 3-like isoform X1 [Solanum lycopersicum]
Solyc07g062810.2	18.85	24.02	0.358953	0.0454945	0.00336386	XP_010324378.1|7.8e-198|D-amino-acid transaminase, chloroplastic-like isoform X2 [Solanum lycopersicum]
Solyc08g077500.2	5.766	7.15	0.358787	0.00322731	0.000143981	XP_010325533.1|0.0e+00|uncharacterized protein LOC101254928 isoform X2 [Solanum lycopersicum]
Solyc10g007500.2	54.853	69.5	0.35846	0.000717321	2.54228e-05	XP_016545024.1|0.0e+00|PREDICTED: mitogen-activated protein kinase 19-like isoform X2 [Capsicum annuum]
Solyc07g043590.2	15.36	19.41	0.357811	0.00963548	0.000505669	XP_022871877.1|8.5e-252|probable polyamine oxidase 2 [Olea europaea var. sylvestris]
Solyc04g074100.2	72.42	91.393	0.357595	0.000474918	1.61821e-05	XP_004237906.1|4.0e-83|uncharacterized protein At4g22758 [Solanum lycopersicum]
Solyc09g090360.2	86.87	109.46	0.356326	9.69769e-06	2.30953e-07	XP_004247746.1|0.0e+00|phosphate transporter PHO1 [Solanum lycopersicum]
Solyc03g119980.2	107.806	135.8	0.355037	0.000343234	1.13776e-05	XP_004235722.1|1.8e-192|caffeoylshikimate esterase [Solanum lycopersicum]
Solyc01g014840.2	7.23	9.176	0.354336	0.0118327	0.000649756	XP_004228809.1|0.0e+00|TMV resistance protein N-like [Solanum lycopersicum]
Solyc02g083250.2	48.023	60.573	0.354293	0.00708994	0.000353385	XP_004232536.1|2.4e-111|ganglioside-induced differentiation-associated protein 2 [Solanum lycopersicum]
Solyc11g066890.1	31.383	39.553	0.353831	0.0168135	0.000998337	XP_004251016.1|1.6e-243|arogenate dehydratase/prephenate dehydratase 6, chloroplastic [Solanum lycopersicum]
Solyc01g096800.2	16.27	20.53	0.353764	0.0472403	0.00351955	XP_004230057.1|3.7e-193|peter Pan-like protein [Solanum lycopersicum]
Solyc11g066060.1	165.726	208.676	0.353702	0.00456345	0.000214606	AAR17080.1|0.0e+00|heat shock protein 70-3 [Nicotiana tabacum]
Solyc07g066030.2	30.696	38.58	0.352879	1.23917e-05	3.03087e-07	XP_015082096.1|0.0e+00|proteasome activator subunit 4 [Solanum pennellii]
Solyc03g098430.2	25.096	31.59	0.351894	0.0209303	0.00130172	XP_010318343.1|3.1e-160|xyloglucan endotransglucosylase/hydrolase protein 9-like isoform X1 [Solanum lycopersicum]
Solyc07g006630.2	26.106	32.893	0.351848	0.0342674	0.00237795	NP_001234448.1|3.6e-227|CONSTANS-like protein [Solanum lycopersicum]
Solyc04g070980.2	22.27	27.976	0.351475	0.00123858	4.78331e-05	XP_019264151.1|0.0e+00|PREDICTED: cycloartenol Synthase-like isoform X2 [Nicotiana attenuata]
Solyc01g096670.2	78.31	98.403	0.350666	0.00739935	0.000371188	XP_004230046.1|5.8e-305|cytochrome P450 98A2 [Solanum lycopersicum]
Solyc05g007290.1	7.033	8.84	0.350647	0.0192541	0.00117269	XP_004238788.1|0.0e+00|PH, RCC1 and FYVE domains-containing protein 1-like [Solanum lycopersicum]
Solyc04g072450.2	76.79	96.356	0.348923	0.00257635	0.000110898	XP_006354052.1|1.3e-79|PREDICTED: protein bfr2-like [Solanum tuberosum]
Solyc07g006760.2	4.62	6.02	0.347968	0.0449986	0.00331815	XP_004242679.1|0.0e+00|serine/threonine-protein kinase ppk1 isoform X2 [Solanum lycopersicum]
Solyc01g079610.2	48.993	61.413	0.347664	0.00381832	0.000176032	XP_004229405.1|5.8e-200|dnaJ protein ERDJ3B [Solanum lycopersicum]
Solyc07g019460.2	84.443	105.66	0.346974	1.81362e-05	4.53807e-07	XP_004242931.1|0.0e+00|NADPH--cytochrome P450 reductase [Solanum lycopersicum]
Solyc03g122370.2	7.01	8.813	0.346592	0.0168532	0.00100138	XP_004235546.1|0.0e+00|exportin-T isoform X2 [Solanum lycopersicum]
Solyc09g074050.2	43.11	53.983	0.345968	0.00234538	9.86914e-05	XP_004247488.1|0.0e+00|uncharacterized protein LOC101267646 [Solanum lycopersicum]
Solyc05g005190.2	137.573	172.286	0.345716	0.0107112	0.000574643	OIV93727.1|9.2e-100|hypothetical protein TanjilG_16578 [Lupinus angustifolius]
Solyc03g005530.1	99.196	124.206	0.344514	0.0085868	0.000440774	AIU41747.1|5.9e-285|phosphorus transporter PT2 [Lycium barbarum]
Solyc03g005560.1	99.196	124.206	0.344514	0.0085868	0.000440774	AIU41747.1|5.9e-285|phosphorus transporter PT2 [Lycium barbarum]
Solyc03g114890.2	52.466	65.586	0.344371	0.00132634	5.17558e-05	XP_019068610.1|2.2e-246|COBRA-like protein 4 isoform X1 [Solanum lycopersicum]
Solyc08g075430.2	51.283	64.153	0.344275	0.00185801	7.54926e-05	NP_001353436.1|0.0e+00|ABC transporter G family member 22 [Solanum lycopersicum]
Solyc08g014050.1	23.996	30.02	0.343768	0.00829135	0.00042394	XP_004244752.1|8.7e-291|cinnamate beta-D-glucosyltransferase-like [Solanum lycopersicum]
Solyc07g007870.2	20.41	25.523	0.342835	0.0139802	0.000798926	XP_006358306.1|1.5e-230|PREDICTED: 12-oxophytodienoate reductase 3 [Solanum tuberosum]
Solyc03g117600.2	104.523	130.493	0.342613	0.000846652	3.07558e-05	XP_004235891.1|1.6e-256|shikimate O-hydroxycinnamoyltransferase [Solanum lycopersicum]
Solyc08g006880.2	82.556	102.59	0.340399	1.10828e-06	2.25151e-08	BAG16520.1|0.0e+00|putative multidrug resistance-associated protein [Capsicum chinense]
Solyc04g009050.2	15.886	20.076	0.339941	0.0189397	0.00114973	XP_025886367.1|2.4e-275|protein LNK1-like isoform X2 [Solanum lycopersicum]
Solyc11g062220.1	12.853	16.016	0.33959	0.00842106	0.00043125	XP_015058184.1|0.0e+00|zinc finger CCCH domain-containing protein 19 isoform X1 [Solanum pennellii]
Solyc02g082660.2	8.826	11.07	0.338976	0.00355047	0.000161255	XP_025885258.1|0.0e+00|DNA mismatch repair protein MLH3 isoform X2 [Solanum lycopersicum]
Solyc08g068880.1	52.73	65.67	0.338243	0.00349844	0.000158118	XP_004245295.1|2.5e-182|protein ENHANCED DISEASE RESISTANCE 2-like [Solanum lycopersicum]
Solyc04g080810.2	34.886	43.473	0.33799	0.0147482	0.000852568	NP_001310969.1|1.3e-91|probable ubiquitin-conjugating enzyme E2 16 [Solanum lycopersicum]
Solyc09g007750.2	11.83	14.646	0.337179	0.0164851	0.000974863	XP_004246660.1|5.9e-239|serine/threonine-protein kinase-like protein CCR1 [Solanum lycopersicum]
Solyc03g093480.2	11.456	14.25	0.336572	0.00129194	5.03098e-05	XP_015069856.1|0.0e+00|uncharacterized protein At3g06530 [Solanum pennellii]
Solyc03g082920.2	145.916	181.373	0.336352	0.00291853	0.000127623	NP_001312029.1|0.0e+00|luminal-binding protein 5 precursor [Nicotiana tabacum]
Solyc10g024320.1	18.343	21.44	0.336005	0.0027958	0.000121371	XP_004248543.1|0.0e+00|lon protease homolog 1, mitochondrial-like [Solanum lycopersicum]
Solyc07g065660.2	12.53	15.61	0.335814	0.0376656	0.00265771	XP_010324247.1|0.0e+00|cellulose synthase-like protein E1 [Solanum lycopersicum]
Solyc09g010440.2	201.746	250.513	0.335439	0.000134843	4.01957e-06	XP_004246462.1|7.1e-74|actin-depolymerizing factor 1 [Solanum lycopersicum]
Solyc07g047790.2	54.45	67.616	0.335217	0.00126992	4.93502e-05	XP_004243554.1|0.0e+00|heat shock protein 90-6, mitochondrial [Solanum lycopersicum]
Solyc02g089620.2	65.736	81.616	0.334104	0.000772899	2.7548e-05	XP_015066286.1|1.1e-282|proline dehydrogenase 2, mitochondrial-like [Solanum pennellii]
Solyc07g041900.2	66.83	82.96	0.333778	0.000721506	2.56292e-05	NP_001296313.1|5.8e-207|cysteine proteinase 3 precursor [Solanum lycopersicum]
Solyc11g011500.1	136.786	169.666	0.333615	0.000524022	1.8045e-05	AQL90330.1|0.0e+00|SKOR [Lycium ruthenicum]
Solyc01g108340.2	19.91	24.736	0.333611	0.0208748	0.00129575	XP_015067254.1|2.6e-211|peptidyl-prolyl cis-trans isomerase CYP40 [Solanum pennellii]
Solyc03g005120.2	30.39	37.76	0.333427	0.0120798	0.000668671	XP_004234009.1|1.1e-154|cystinosin homolog [Solanum lycopersicum]
Solyc10g054440.1	22.523	27.956	0.332833	0.0113129	0.000616662	NP_001234064.1|0.0e+00|arginine decarboxylase [Solanum lycopersicum]
Solyc08g067740.2	72.163	89.56	0.330708	5.63583e-05	1.5213e-06	XP_015168480.1|6.7e-65|PREDICTED: uncharacterized protein LOC102605550 [Solanum tuberosum]
Solyc01g102380.2	1659.95	2053.01	0.32961	0.000472323	1.60747e-05	NP_001233861.1|7.3e-123|germin-like protein precursor [Solanum lycopersicum]
Solyc05g010660.2	8.28	10.263	0.329574	0.0425429	0.00308914	XP_019256902.1|0.0e+00|PREDICTED: DNA-directed RNA polymerase 1, mitochondrial [Nicotiana attenuata]
Solyc02g032480.1	5.616	6.916	0.329044	0.0499635	0.00375862	XP_010315773.1|1.9e-192|nuclear pore complex protein NUP214 [Solanum lycopersicum]
Solyc11g072880.1	68.61	84.766	0.328845	7.48453e-06	1.72525e-07	XP_004251293.1|0.0e+00|calcium-transporting ATPase 4, endoplasmic reticulum-type-like [Solanum lycopersicum]
Solyc03g113220.2	94.363	116.65	0.328342	0.00113488	4.30521e-05	XP_016563585.1|4.2e-153|PREDICTED: hypersensitive-induced response protein 1 [Capsicum annuum]
Solyc11g072930.1	62	76.59	0.327919	0.000510924	1.75528e-05	XP_004251454.1|0.0e+00|putative leucine-rich repeat receptor-like protein kinase At2g19210 [Solanum lycopersicum]
Solyc11g062010.1	27.156	33.45	0.327685	0.00612215	0.00029899	XP_015057784.1|0.0e+00|chromatin structure-remodeling complex protein SYD isoform X1 [Solanum pennellii]
Solyc10g076240.1	152.426	188.316	0.32693	0.00079492	2.85248e-05	XP_004249055.1|4.8e-181|cationic peroxidase 1 [Solanum lycopersicum]
Solyc11g065340.1	14.673	18.546	0.326705	0.0198268	0.00121645	XP_010313263.1|0.0e+00|uncharacterized protein LOC101258129 isoform X1 [Solanum lycopersicum]
Solyc04g064550.1	56.593	69.83	0.325853	0.000284173	9.21406e-06	NP_001293096.1|0.0e+00|GRAS6 protein [Solanum lycopersicum]
Solyc08g006110.2	97.873	120.74	0.325604	0.000183004	5.68345e-06	XP_004244469.1|2.0e-202|bZIP transcription factor RISBZ4 [Solanum lycopersicum]
Solyc10g083600.1	43.073	53.206	0.325485	0.0232067	0.00146571	XP_004249458.1|1.6e-179|ribosome production factor 2 homolog [Solanum lycopersicum]
Solyc10g083290.1	37.796	46.62	0.325181	0.00439287	0.000205347	NP_001233842.2|0.0e+00|acid invertase [Solanum lycopersicum]
Solyc07g005100.2	90.77	111.83	0.323586	0.00238347	0.00010087	XP_004242562.1|4.3e-220|class V chitinase [Solanum lycopersicum]
Solyc01g099210.2	16.456	20.286	0.323567	0.016448	0.000972003	XP_004230207.1|0.0e+00|probable linoleate 9S-lipoxygenase 5 [Solanum lycopersicum]
Solyc09g065870.2	18.19	22.44	0.323414	0.0278749	0.00183467	XP_004247214.1|1.9e-248|E3 ubiquitin-protein ligase RGLG3 [Solanum lycopersicum]
Solyc11g065160.1	14.263	16.156	0.323016	0.00822275	0.000420102	XP_010313253.1|0.0e+00|DDT domain-containing protein PTM [Solanum lycopersicum]
Solyc08g062630.2	63.7	78.366	0.322836	1.18957e-05	2.8952e-07	XP_015084853.1|0.0e+00|aminopeptidase M1 [Solanum pennellii]
Solyc03g121070.2	65.973	81.216	0.322453	0.00711913	0.000355126	NP_001233957.1|1.0e-283|hexokinase [Solanum lycopersicum]
Solyc04g080190.2	72.833	89.64	0.321797	0.00241252	0.000102487	XP_004238246.1|8.1e-118|outer envelope pore protein 24A, chloroplastic [Solanum lycopersicum]
Solyc08g021910.1	20.266	24.82	0.320815	0.00561582	0.000271777	XP_009384130.1|0.0e+00|PREDICTED: dnaJ homolog subfamily C GRV2 [Musa acuminata subsp. malaccensis]
Solyc09g082650.2	183.72	225.713	0.32043	2.57573e-05	6.61082e-07	NP_001318092.1|1.1e-87|acireductone dioxygenase [Solanum lycopersicum]
Solyc09g008350.2	19.676	24.233	0.320125	0.0314383	0.00211714	XP_004246614.1|1.1e-239|ACT domain-containing protein ACR10 [Solanum lycopersicum]
Solyc04g072890.2	26.36	33.196	0.319888	0.00336379	0.000151153	XP_006354002.1|1.2e-248|PREDICTED: uncharacterized WD repeat-containing protein C2A9.03-like [Solanum tuberosum]
Solyc11g065620.1	36.196	44.476	0.319404	0.0123973	0.000688741	NP_001266248.1|0.0e+00|sulfite reductase [Solanum lycopersicum]
Solyc06g009290.2	41.973	51.396	0.318959	0.000157956	4.79751e-06	XP_004240558.1|0.0e+00|ABC transporter B family member 21 [Solanum lycopersicum]
Solyc03g118040.2	323.68	397.066	0.318603	5.85488e-05	1.58514e-06	NP_001234129.1|0.0e+00|calnexin-like protein precursor [Solanum lycopersicum]
Solyc01g104040.2	34.363	42.146	0.318364	3.11714e-05	8.07562e-07	XP_004230486.1|0.0e+00|UDP-glucose:glycoprotein glucosyltransferase isoform X1 [Solanum lycopersicum]
Solyc08g065250.2	13.396	15.893	0.316945	0.0109628	0.000591406	XP_004245365.2|0.0e+00|probable serine/threonine-protein kinase SIS8 [Solanum lycopersicum]
Solyc01g007910.2	87.803	107.693	0.316783	0.00687434	0.000341532	NP_001234277.2|3.3e-187|succinate--CoA ligase [ADP-forming] subunit alpha-1, mitochondrial [Solanum lycopersicum]
Solyc04g078110.1	66.163	81.053	0.316202	0.000189542	5.90937e-06	XP_009615143.1|0.0e+00|PREDICTED: subtilisin-like protease SBT1.7 [Nicotiana tomentosiformis]
Solyc02g083460.2	57.913	70.98	0.315872	0.00478993	0.000227184	NP_001333366.1|0.0e+00|aspartyl protease family protein precursor [Solanum lycopersicum]
Solyc09g090730.1	62.986	77.196	0.315807	0.00210426	8.7106e-05	NP_001304667.1|3.2e-293|ammonium transporter 1 member 1 [Solanum lycopersicum]
Solyc05g056390.2	205.363	251.57	0.31497	0.0257783	0.00166442	NP_001333033.1|1.8e-47|chaperonin [Solanum lycopersicum]
Solyc04g012120.2	478.673	585.933	0.314312	0.00181511	7.36035e-05	NP_001234107.2|5.2e-139|14-3-3 protein 5 [Solanum lycopersicum]
Solyc04g011480.2	88.79	108.763	0.314236	0.0342674	0.00237677	XP_004236750.1|6.1e-90|CASP-like protein PIMP1 [Solanum lycopersicum]
Solyc08g074490.2	30.01	36.783	0.314031	0.0276086	0.0018137	XP_004246066.3|4.0e-239|uncharacterized protein At4g15970 [Solanum lycopersicum]
Solyc01g104770.2	97.856	118.796	0.313361	0.00104914	3.94198e-05	NP_001309932.1|4.0e-217|actin [Solanum lycopersicum]
Solyc05g021390.2	37.2	45.586	0.313282	0.0323079	0.00221079	XP_015075803.1|4.3e-283|beta-amyrin 28-monooxygenase-like [Solanum pennellii]
Solyc06g063170.2	11.2	14.01	0.313215	0.0146039	0.000843055	XP_004241860.2|0.0e+00|glutamate receptor 2.8 isoform X2 [Solanum lycopersicum]
Solyc05g052260.2	26.22	32.136	0.313067	0.0440248	0.00322686	XP_004239966.1|2.5e-155|uncharacterized protein LOC101264723 isoform X2 [Solanum lycopersicum]
Solyc04g076540.2	11.47	13.753	0.312633	0.00400735	0.000186036	XP_010320226.1|0.0e+00|protein SABRE isoform X3 [Solanum lycopersicum]
Solyc09g092240.2	5.936	7.273	0.312608	0.0351592	0.0024554	XP_010326859.1|0.0e+00|small subunit processome component 20 homolog [Solanum lycopersicum]
Solyc07g043420.2	223.576	273.306	0.312479	0.00977305	0.000513854	NP_001233775.1|5.6e-202|2-oxoglutarate-dependent dioxygenase 2 [Solanum lycopersicum]
Solyc04g071440.2	90.633	110.626	0.312309	0.000124918	3.6986e-06	XP_004237792.1|1.7e-246|tubby-like F-box protein 8 [Solanum lycopersicum]
Solyc07g043460.2	39.786	48.63	0.311428	0.0257783	0.00166403	NP_001352908.1|1.0e-304|GLYCOALKALOID METABOLISM 6 [Solanum lycopersicum]
Solyc05g010260.2	51.17	62.57	0.311138	0.0493632	0.00371148	XP_004238989.1|1.7e-158|6-phosphogluconate dehydrogenase, decarboxylating 3 [Solanum lycopersicum]
Solyc01g065700.2	43.886	53.316	0.309674	0.0273593	0.00178968	XP_004229276.1|7.0e-208|probable protein phosphatase 2C 34 [Solanum lycopersicum]
Solyc04g005160.1	99.743	121.676	0.309184	0.0120571	0.000665667	XP_004237068.1|7.4e-271|6-phosphogluconate dehydrogenase, decarboxylating 3 [Solanum lycopersicum]
Solyc02g064970.2	961.936	1172.59	0.308912	0.000147551	4.43402e-06	XP_004233442.2|1.0e-185|peroxidase 25 [Solanum lycopersicum]
Solyc04g009860.2	29.5	35.99	0.308243	0.0163656	0.00096582	XP_004236794.1|3.9e-214|1-aminocyclopropane-1-carboxylate oxidase homolog 1 [Solanum lycopersicum]
Solyc02g063170.2	78.656	95.156	0.307691	0.00748363	0.000375717	XP_004233491.1|2.6e-136|protein ABA DEFICIENT 4, chloroplastic-like isoform X1 [Solanum lycopersicum]
Solyc08g078530.2	32.036	38.673	0.307171	7.27526e-05	2.01066e-06	XP_004246157.1|0.0e+00|uncharacterized protein LOC101252108 isoform X2 [Solanum lycopersicum]
Solyc01g105370.2	26.1	31.833	0.306976	0.0472141	0.0035157	XP_004230569.1|1.1e-189|uncharacterized protein LOC101251627 [Solanum lycopersicum]
Solyc08g069040.2	62.123	75.62	0.305823	0.00947476	0.000494358	XP_004245302.1|1.7e-190|peroxidase 45-like [Solanum lycopersicum]
Solyc12g042480.1	36.196	44.046	0.305645	0.00704953	0.000351087	XP_004252295.1|1.3e-289|cytochrome P450 CYP736A12-like [Solanum lycopersicum]
Solyc01g106210.2	81.896	99.596	0.305028	0.0091813	0.000476092	XP_009769457.1|0.0e+00|PREDICTED: heat shock 70 kDa protein, mitochondrial-like [Nicotiana sylvestris]
Solyc01g099980.2	27.95	33.25	0.304192	0.00243728	0.000103793	XP_004230264.1|2.1e-224|glycine-rich domain-containing protein 2 isoform X2 [Solanum lycopersicum]
Solyc01g108600.2	18.356	22.696	0.303927	0.00398033	0.000184437	XP_016539607.1|0.0e+00|PREDICTED: presequence protease 1, chloroplastic/mitochondrial-like [Capsicum annuum]
Solyc01g094660.2	13.516	16.26	0.303279	0.0279745	0.00184336	XP_004229888.1|0.0e+00|U-box domain-containing protein 33 isoform X1 [Solanum lycopersicum]
Solyc06g011400.2	12.726	14.753	0.302993	0.0240249	0.00152705	XP_006355921.1|6.6e-274|PREDICTED: chaperone protein ClpB4, mitochondrial-like [Solanum tuberosum]
Solyc03g025610.1	42.373	51.473	0.302326	0.0217261	0.00135733	XP_025886046.1|4.3e-230|tripeptidyl-peptidase 2 [Solanum lycopersicum]
Solyc01g099840.2	538.466	653.076	0.30053	0.00172747	6.95631e-05	XP_004230256.1|1.6e-66|dormancy-associated protein homolog 3 [Solanum lycopersicum]
Solyc04g081580.2	24.47	29.673	0.300458	0.0124966	0.000695763	XP_015074090.1|0.0e+00|DEAD-box ATP-dependent RNA helicase 28 [Solanum pennellii]
Solyc10g012370.2	28.9	34.62	0.300399	0.0467248	0.0034755	BAP47505.1|5.3e-174|O-acetylserine (thiol)lyase [Gentiana triflora]
Solyc09g065550.2	24.393	29.313	0.300358	0.00216465	8.978e-05	XP_004247328.1|0.0e+00|protein NETWORKED 1D-like [Solanum lycopersicum]
Solyc02g087000.2	21.386	25.89	0.298273	0.0128119	0.000718475	AXF48687.1|0.0e+00|transporter 8-like protein [Lycium ruthenicum]
Solyc03g121860.1	76.393	92.62	0.297785	0.0481909	0.00360976	XP_004235579.1|1.8e-103|mitochondrial import inner membrane translocase subunit TIM23-1 [Solanum lycopersicum]
Solyc04g076210.2	27.043	32.703	0.297288	0.00132581	5.16819e-05	XP_004237986.1|0.0e+00|ubiquitin carboxyl-terminal hydrolase 17 [Solanum lycopersicum]
Solyc02g089260.2	12.123	14.663	0.296692	0.00953584	0.00049908	XP_004233657.2|0.0e+00|LOW QUALITY PROTEIN: auxin transport protein BIG [Solanum lycopersicum]
Solyc10g084050.1	86.726	104.79	0.296538	0.000562477	1.94824e-05	XP_015055575.1|0.0e+00|cell division cycle protein 48 homolog isoform X2 [Solanum pennellii]
Solyc08g066110.2	142.206	171.87	0.295984	0.0111849	0.000608703	NP_001233973.1|7.7e-71|profilin-2 [Solanum lycopersicum]
Solyc07g052940.2	14.126	17.1	0.294595	0.0114487	0.000625449	XP_010323788.1|0.0e+00|histone-lysine N-methyltransferase ATXR3 [Solanum lycopersicum]
Solyc06g069480.2	12.85	15.516	0.294367	0.0162358	0.00095685	XP_016555888.1|0.0e+00|PREDICTED: DExH-box ATP-dependent RNA helicase DExH14 isoform X1 [Capsicum annuum]
Solyc03g119200.2	177.173	213.416	0.293128	5.5848e-05	1.50528e-06	XP_004235785.1|1.1e-246|L-Ala-D/L-amino acid epimerase [Solanum lycopersicum]
Solyc05g008630.2	35.293	42.813	0.292245	0.00178207	7.19767e-05	XP_004238881.1|0.0e+00|nuclear poly(A) polymerase 1 [Solanum lycopersicum]
Solyc10g083720.1	134.98	162.613	0.292096	0.00117519	4.50541e-05	XP_004249465.1|1.0e-297|pyruvate kinase 2, cytosolic [Solanum lycopersicum]
Solyc06g073970.1	74.263	89.6	0.291952	0.0206052	0.00127156	XP_004241348.1|9.4e-210|uncharacterized protein LOC101260237 [Solanum lycopersicum]
Solyc01g080920.2	26.363	31.736	0.289647	0.0279995	0.00184613	XP_004229574.4|8.2e-234|E3 ubiquitin-protein ligase PUB23-like [Solanum lycopersicum]
Solyc01g097640.2	17.933	21.553	0.288164	0.00493598	0.000235898	XP_004230113.1|0.0e+00|ribosome biogenesis protein BMS1 homolog [Solanum lycopersicum]
Solyc04g050510.2	23.026	25.236	0.287903	0.00114197	4.3367e-05	XP_019193908.1|0.0e+00|PREDICTED: eIF-2-alpha kinase activator GCN1 isoform X7 [Ipomoea nil]
Solyc09g010560.1	19.146	23	0.287623	0.00391101	0.000180777	XP_004246400.1|0.0e+00|5-oxoprolinase [Solanum lycopersicum]
Solyc02g031860.2	51.876	61.653	0.287299	0.00119063	4.57898e-05	XP_010315671.1|0.0e+00|uncharacterized protein LOC101248152 [Solanum lycopersicum]
Solyc03g114950.2	91.463	109.93	0.287124	0.00750016	0.000376849	NP_001311224.1|0.0e+00|ABC transporter B family member 21 [Solanum lycopersicum]
Solyc05g008600.2	316.143	379.263	0.286258	0.00133173	5.20198e-05	XP_004238877.1|1.3e-223|fructose-bisphosphate aldolase 3, chloroplastic [Solanum lycopersicum]
Solyc01g068610.2	13.66	15.853	0.284518	0.0126384	0.00070671	XP_004229153.1|0.0e+00|paladin [Solanum lycopersicum]
Solyc06g067940.2	151.173	181.343	0.284263	0.0277962	0.00182826	XP_004241710.1|6.8e-91|putative cytochrome c oxidase subunit 5b-like [Solanum lycopersicum]
Solyc10g055230.1	170.26	204.486	0.284026	0.0298516	0.0019946	XP_004248662.1|1.7e-101|dirigent protein 22 [Solanum lycopersicum]
Solyc10g005560.2	197.5	236.536	0.283582	0.000607677	2.11946e-05	XP_017614081.1|5.1e-78|PREDICTED: polyubiquitin 3-like [Gossypium arboreum]
Solyc05g050970.2	212.63	254.466	0.283343	0.000281211	9.10671e-06	XP_006345515.1|0.0e+00|PREDICTED: transketolase, chloroplastic-like [Solanum tuberosum]
Solyc07g008880.2	42.8	51.253	0.283251	0.00324093	0.00014485	XP_004242824.1|0.0e+00|pre-mRNA-processing-splicing factor 8A [Solanum lycopersicum]
Solyc10g083630.1	20.123	24.096	0.283025	0.00381866	0.000176201	XP_004249459.3|0.0e+00|protein ROS1 [Solanum lycopersicum]
Solyc07g062400.2	120.37	144.203	0.282741	0.0101776	0.000539627	NP_001307152.1|1.7e-69|multiprotein bridging factor 1c [Solanum lycopersicum]
Solyc03g115510.1	7.753	8.71	0.282656	0.0419783	0.00302113	XP_004236487.1|0.0e+00|uncharacterized protein LOC101264110 [Solanum lycopersicum]
Solyc01g094640.2	26.91	31.573	0.280692	0.00244512	0.000104266	XP_010326453.1|0.0e+00|uncharacterized protein LOC101249582 isoform X5 [Solanum lycopersicum]
Solyc07g008040.2	16.826	20.123	0.280571	0.0139193	0.000794014	XP_010323294.1|0.0e+00|topless-related protein 4-like isoform X2 [Solanum lycopersicum]
Solyc04g081510.2	45.083	53.853	0.279706	0.00234769	9.89191e-05	XP_004238364.1|0.0e+00|uncharacterized protein LOC101264621 [Solanum lycopersicum]
Solyc07g032740.2	92.366	110.32	0.27949	0.00493117	0.000235271	NP_001308263.1|7.3e-195|aspartate aminotransferase, cytoplasmic [Solanum lycopersicum]
Solyc11g011220.1	29.9	35.723	0.279309	0.0322254	0.00220255	XP_004250186.1|0.0e+00|uncharacterized protein LOC101258515 [Solanum lycopersicum]
Solyc06g074180.1	32.236	38.48	0.277642	0.0274918	0.0018027	XP_004241332.1|1.1e-293|cytochrome P450 89A2-like [Solanum lycopersicum]
Solyc01g081520.2	32.91	39.253	0.277552	0.00727128	0.000363581	XP_010323430.1|0.0e+00|UTP--glucose-1-phosphate uridylyltransferase isoform X1 [Solanum lycopersicum]
BGI_novel_G000381	267.806	319.176	0.27706	0.00082363	2.97207e-05
Solyc11g012400.1	57.553	68.643	0.276261	0.0246171	0.00157459	XP_004250272.1|4.3e-188|putative MO25-like protein At5g47540 [Solanum lycopersicum]
Solyc08g075870.2	31.963	38.036	0.275146	0.0239556	0.00152168	XP_004245921.1|0.0e+00|probable methyltransferase PMT21 [Solanum lycopersicum]
Solyc03g114340.2	33.993	40.483	0.274925	0.0215477	0.00134446	NP_001234553.2|3.5e-273|1-deoxy-D-xylulose-5-phosphate reductoisomerase [Solanum lycopersicum]
Solyc08g081930.2	42.14	50.196	0.2747	0.0252664	0.0016273	XP_015085407.1|2.7e-174|putative glucose-6-phosphate 1-epimerase [Solanum pennellii]
Solyc07g064270.2	144.003	171.166	0.272667	0.00295617	0.000129506	XP_004244144.1|3.0e-222|glucose-6-phosphate/phosphate translocator 1, chloroplastic [Solanum lycopersicum]
Solyc08g081010.2	42.276	50.213	0.271707	0.0091782	0.000475562	XP_025888058.1|0.0e+00|glutamate--cysteine ligase, chloroplastic isoform X1 [Solanum lycopersicum]
Solyc08g083280.2	91.663	108.853	0.271703	0.00228985	9.61913e-05	XP_004245447.1|2.6e-220|alcohol dehydrogenase-like 4 [Solanum lycopersicum]
Solyc06g071120.2	14.223	16.9	0.271658	0.0243837	0.00155868	XP_004241561.1|0.0e+00|uncharacterized protein LOC101248307 [Solanum lycopersicum]
Solyc10g080350.1	14.13	16.703	0.271338	0.0186351	0.00112749	XP_004249758.1|0.0e+00|DNA-directed RNA polymerase I subunit 1 [Solanum lycopersicum]
Solyc11g020810.1	35.763	42.42	0.269015	0.0457674	0.0033914	XP_004250419.1|0.0e+00|putative rRNA methyltransferase [Solanum lycopersicum]
Solyc01g099100.2	37.93	44.96	0.268669	0.00871837	0.000449281	XP_016555367.1|0.0e+00|PREDICTED: long chain acyl-CoA synthetase 6, peroxisomal [Capsicum annuum]
Solyc01g106260.2	48.653	57.666	0.268201	0.0398733	0.00284397	NP_001305489.1|0.0e+00|heat shock 70 kDa protein, mitochondrial [Solanum tuberosum]
Solyc03g096990.2	35.743	42.363	0.26704	0.0449285	0.00330936	XP_004235319.1|8.6e-300|cytochrome P450 89A2-like [Solanum lycopersicum]
Solyc09g009080.2	19.626	22.856	0.266968	0.0076203	0.000384418	XP_010325938.1|0.0e+00|protein ROS1 [Solanum lycopersicum]
Solyc12g008730.1	181.313	214.36	0.266032	0.00539521	0.000260232	XP_015059181.1|3.6e-31|uncharacterized protein LOC107005172 [Solanum pennellii]
Solyc07g063040.2	56.933	67.38	0.265955	0.0118012	0.000647074	XP_004244237.1|9.4e-295|probable bifunctional methylthioribulose-1-phosphate dehydratase/enolase-phosphatase E1 1 [Solanum lycopersicum]
Solyc10g006480.1	725.193	856.913	0.265057	0.00091416	3.36126e-05	XP_022879942.1|2.7e-254|polyubiquitin isoform X1 [Olea europaea var. sylvestris]
Solyc01g088700.2	47.16	55.34	0.264599	0.00159884	6.35471e-05	XP_004229717.1|0.0e+00|eukaryotic translation initiation factor 4G [Solanum lycopersicum]
Solyc04g072630.2	7.53	8.8	0.264026	0.0313147	0.00210682	XP_004238511.1|0.0e+00|putative leucine-rich repeat-containing protein DDB_G0290503 [Solanum lycopersicum]
Solyc06g053570.2	18.943	22.38	0.264009	0.0144261	0.000832207	XP_004241008.1|0.0e+00|nuclear-pore anchor [Solanum lycopersicum]
Solyc02g083310.2	55.836	65.88	0.263334	0.0173681	0.00103966	XP_004232531.1|8.0e-183|bifunctional nuclease 2 [Solanum lycopersicum]
Solyc05g053360.2	38.09	43.19	0.263053	0.0185254	0.00111937	XP_004239881.1|2.6e-97|uncharacterized protein LOC101265439 isoform X1 [Solanum lycopersicum]
Solyc07g017780.2	722.906	849.12	0.26208	0.00115428	4.39309e-05	XP_019177940.1|0.0e+00|PREDICTED: plasma membrane ATPase 4 isoform X1 [Ipomoea nil]
Solyc04g071880.2	45.346	53.03	0.261268	0.0101776	0.000539226	PHT50577.1|0.0e+00|Pyrophosphate-energized membrane proton pump 3 [Capsicum baccatum]
Solyc07g062570.2	175.64	207.14	0.261044	0.0318235	0.00216545	NP_001274306.1|2.2e-82|ubiquitin-conjugating enzyme E2 35-like [Solanum lycopersicum]
Solyc03g096800.2	49.953	58.866	0.260641	0.00125104	4.84151e-05	XP_010318266.1|0.0e+00|uncharacterized protein LOC101245142 isoform X2 [Solanum lycopersicum]
Solyc03g051900.2	11.603	13.666	0.259145	0.0218491	0.00136766	XP_010317858.1|0.0e+00|rRNA biogenesis protein RRP5 [Solanum lycopersicum]
Solyc04g010250.2	59.383	69.936	0.25886	0.044063	0.00323143	XP_004236766.1|1.1e-186|caffeoylshikimate esterase [Solanum lycopersicum]
Solyc01g065580.2	30.656	36.066	0.257536	0.0247934	0.00158787	XP_004229278.1|0.0e+00|pumilio homolog 24 [Solanum lycopersicum]
Solyc07g066600.2	539.256	635.84	0.25714	0.00374984	0.00017212	NP_001316520.1|3.1e-221|phosphoglycerate kinase [Solanum lycopersicum]
Solyc01g008090.2	577.34	678.28	0.256149	0.015098	0.000878257	XP_004228542.1|1.1e-44|40S ribosomal protein S27-2 isoform X1 [Solanum lycopersicum]
BGI_novel_G000333	82.693	97.246	0.255846	0.0473244	0.00353153
Solyc01g094800.2	18.306	21.396	0.255013	0.0262483	0.00170427	XP_010326507.1|0.0e+00|ATP-dependent helicase BRM [Solanum lycopersicum]
Solyc08g082610.2	122.013	143.233	0.254667	0.0110809	0.00059965	XP_004245501.1|3.7e-191|B2 protein [Solanum lycopersicum]
Solyc06g069890.2	57.823	67.886	0.25447	0.0434455	0.00317216	XP_015077208.1|7.7e-149|NAP1-related protein 2-like [Solanum pennellii]
Solyc03g096000.2	24.203	28.383	0.25399	0.00286486	0.00012516	XP_004235240.1|0.0e+00|clathrin heavy chain 1 [Solanum lycopersicum]
Solyc09g008480.2	50.783	59.556	0.253765	0.00447795	0.000210225	XP_004246603.1|0.0e+00|phosphatidylinositol 4-phosphate 5-kinase 9 [Solanum lycopersicum]
Solyc01g111730.2	36	42.246	0.253637	0.0333367	0.0023013	PHT64064.1|2.5e-212|putative protein phosphatase 2C 28 [Capsicum annuum]
Solyc03g083440.2	319.08	371.65	0.253579	0.0107886	0.000579838	XP_019233327.1|0.0e+00|PREDICTED: glutamate synthase 1 [NADH], chloroplastic isoform X1 [Nicotiana attenuata]
Solyc01g096190.2	23.473	27.386	0.252435	0.0282743	0.00186994	NP_001234073.1|0.0e+00|calcium-transporting ATPase, endoplasmic reticulum-type [Solanum lycopersicum]
Solyc12g095890.1	31.143	36.29	0.252106	0.00870874	0.000448084	PHT32615.1|0.0e+00|Nuclear poly(A) polymerase 4 [Capsicum baccatum]
Solyc09g091840.2	101.44	118.61	0.251261	0.00339077	0.000152638	NP_001308323.1|1.4e-258|glutathione reductase [Solanum lycopersicum]
Solyc12g089110.1	335.253	392.486	0.250674	0.0243439	0.00155222
Solyc05g010120.2	13.313	15.58	0.249715	0.0437589	0.00320384	XP_004238982.1|0.0e+00|putative phospholipid-transporting ATPase 9 [Solanum lycopersicum]
Solyc10g081030.1	227.663	266.233	0.24935	0.0249285	0.00159953	XP_006339247.1|4.7e-102|PREDICTED: nascent polypeptide-associated complex subunit alpha-like protein 1 [Solanum tuberosum]
Solyc11g010270.1	100.613	117.716	0.249239	0.0166206	0.000986219	XP_004250119.1|4.1e-202|homeobox-leucine zipper protein ATHB-6 [Solanum lycopersicum]
Solyc07g041660.2	31.83	36.84	0.249225	0.0477169	0.00356658	XP_010324009.1|0.0e+00|uncharacterized protein LOC101255216 isoform X1 [Solanum lycopersicum]
Solyc03g120780.2	411.443	480.893	0.248969	0.0232286	0.00146803	XP_004235660.1|3.4e-49|60S ribosomal protein L37-3 [Solanum lycopersicum]
Solyc03g123730.2	53.376	62.37	0.24788	0.0440978	0.00323576	XP_004235518.1|3.9e-247|26S proteasome regulatory subunit 7 homolog A [Solanum lycopersicum]
Solyc09g091180.2	67.036	78.226	0.246469	0.0319294	0.00217593	XP_016566410.1|8.3e-300|PREDICTED: chaperonin CPN60, mitochondrial [Capsicum annuum]
Solyc07g008320.2	57.023	66.393	0.245495	0.00355476	0.000161593	XP_010323145.1|0.0e+00|auto-inhibited Ca2 -transporting ATPase 10 isoform X1 [Solanum lycopersicum]
Solyc03g118340.2	23.59	27.503	0.245048	0.0226187	0.00142129	NP_001316890.1|0.0e+00|ATP-dependent Clp protease ATP-binding subunit ClpA homolog CD4A, chloroplastic [Solanum lycopersicum]
Solyc06g073720.1	44.896	52.363	0.244923	0.0415885	0.00298638	NP_001234541.1|0.0e+00|protein ETHYLENE INSENSITIVE 3-Like 1 [Solanum lycopersicum]
Solyc04g074550.2	178.743	208.166	0.243426	0.0171278	0.00102024	XP_004237938.1|1.7e-101|cytochrome c oxidase subunit 6b-1 [Solanum lycopersicum]
Solyc09g061430.2	36.506	42.516	0.24318	0.0417783	0.00300497	XP_015088013.1|0.0e+00|guanine nucleotide-binding protein-like NSN1 [Solanum pennellii]
Solyc04g077970.2	307.546	357.466	0.240528	0.0111032	0.000602997	XP_015073845.1|9.8e-143|adenine phosphoribosyltransferase 1-like [Solanum pennellii]
Solyc10g076910.1	18.55	21.396	0.240205	0.0318235	0.0021628	XP_004249090.1|0.0e+00|pre-mRNA-splicing factor ATP-dependent RNA helicase DEAH7 [Solanum lycopersicum]
Solyc11g039830.1	49.91	57.95	0.239497	0.0243795	0.00155645	XP_015058411.1|0.0e+00|glycine--tRNA ligase, mitochondrial 1-like [Solanum pennellii]
Solyc02g090760.2	24.07	27.93	0.238054	0.0237627	0.00150847	XP_010316143.1|0.0e+00|uncharacterized protein LOC101252655 isoform X1 [Solanum lycopersicum]
Solyc01g080890.2	132.326	153.356	0.237168	0.0329386	0.00226322	XP_015063203.1|2.3e-35|uncharacterized protein LOC107008608 [Solanum pennellii]
Solyc09g090980.2	144.64	167.78	0.236858	0.0259195	0.00167666	NP_001275580.1|3.0e-86|pathogenesis-related protein STH-2-like [Solanum lycopersicum]
Solyc01g005560.2	476.91	551.773	0.234598	0.0180041	0.00108424	XP_004228607.1|4.7e-242|isocitrate dehydrogenase [NADP] [Solanum lycopersicum]
Solyc07g005560.2	667.063	771.2	0.23341	0.00822142	0.000419703	NP_001234503.1|4.9e-87|eukaryotic translation initiation factor 5A-2 [Solanum lycopersicum]
Solyc02g093370.2	69.993	80.896	0.232339	0.0210141	0.00130947	XP_004231846.1|1.9e-224|altered inheritance of mitochondria protein 32 [Solanum lycopersicum]
Solyc03g025350.2	91.736	105.7	0.231744	0.0313147	0.00210755	XP_010317628.1|5.0e-188|silicon efflux transporter LSI2-like [Solanum lycopersicum]
Solyc01g010760.2	154.413	178.336	0.231735	0.0281431	0.00185786	XP_004228386.1|1.8e-151|mitochondrial outer membrane protein porin of 36 kDa [Solanum lycopersicum]
Solyc03g082400.2	46.803	54.08	0.230804	0.0425429	0.003088	XP_019068457.1|7.9e-217|polyadenylate-binding protein-interacting protein 12 [Solanum lycopersicum]
Solyc01g111890.2	56.11	63.69	0.228124	0.0241299	0.0015363	XP_019067490.1|0.0e+00|F-box/LRR-repeat protein 10 isoform X1 [Solanum lycopersicum]
Solyc02g081430.2	115.34	132.896	0.228054	0.0278749	0.00183568	XP_004232661.1|7.9e-80|microsomal glutathione S-transferase 3 [Solanum lycopersicum]
Solyc09g083080.2	133.273	153.203	0.227022	0.0166177	0.000984951	NP_001311285.1|4.7e-308|MAR-binding protein [Solanum lycopersicum]
Solyc09g064440.2	24.456	28.14	0.226697	0.0180504	0.00108849	XP_004247127.1|0.0e+00|ABC transporter C family member 5 [Solanum lycopersicum]
Solyc02g083590.2	54.313	62.52	0.226483	0.0357893	0.00250804	NP_001233863.1|4.4e-252|3-dehydroquinate synthase, chloroplastic [Solanum lycopersicum]
Solyc05g010670.2	39.523	45.466	0.225897	0.0312968	0.00210257	XP_004239010.1|0.0e+00|heat shock protein 90-5, chloroplastic [Solanum lycopersicum]
Solyc12g015880.1	284.566	327.116	0.225224	0.0228341	0.00143942	NP_001234436.1|0.0e+00|molecular chaperone Hsp90-1 [Solanum lycopersicum]
Solyc11g062190.1	460.366	530.74	0.224847	0.0321464	0.00219501	NP_001293067.1|7.0e-219|ADP, ATP carrier protein, mitochondrial-like [Solanum lycopersicum]
Solyc04g081570.2	227.376	261.3	0.224814	0.0396061	0.00282173	XP_004238368.1|0.0e+00|endoplasmin homolog [Solanum lycopersicum]
Solyc10g051390.1	241.046	281.393	0.224009	0.0328591	0.00225511	XP_018477974.1|5.2e-48|PREDICTED: glycine-rich RNA-binding protein GRP2A [Raphanus sativus]
Solyc01g111530.2	30.623	35.186	0.223901	0.0336598	0.00232902	XP_004231037.1|0.0e+00|E3 ubiquitin-protein ligase UPL3 [Solanum lycopersicum]
Solyc08g081730.2	200.953	230.893	0.223882	0.0133882	0.000755097	XP_004245560.1|2.6e-152|reticulon-like protein B4 [Solanum lycopersicum]
Solyc10g076870.1	28.823	33.066	0.222875	0.0316768	0.00214721	XP_004249087.1|0.0e+00|uncharacterized protein LOC101252732 [Solanum lycopersicum]
Solyc05g008460.2	563.093	646.763	0.220608	0.0380698	0.00269307	XP_004238867.1|0.0e+00|ATP synthase subunit beta, mitochondrial [Solanum lycopersicum]
Solyc06g065540.2	24.153	27.67	0.22024	0.0336839	0.00233205	XP_010322750.1|0.0e+00|putative 1-phosphatidylinositol-3-phosphate 5-kinase FAB1D [Solanum lycopersicum]
Solyc12g017830.1	32.153	36.836	0.219893	0.0422047	0.00305512	XP_015061075.1|0.0e+00|brefeldin A-inhibited guanine nucleotide-exchange protein 5 isoform X1 [Solanum pennellii]
Solyc11g068540.1	116.593	133.416	0.217987	0.033381	0.00230571	NP_001234385.1|7.0e-174|N-carbamoylputrescine amidase [Solanum lycopersicum]
Solyc03g111570.2	29.956	31.88	0.217063	0.0328591	0.00225448	XP_016563764.1|0.0e+00|PREDICTED: callose synthase 10 [Capsicum annuum]
Solyc07g006790.2	115.563	132.066	0.216826	0.0319294	0.0021756	XP_004242683.1|0.0e+00|dihydrolipoyllysine-residue acetyltransferase component 2 of pyruvate dehydrogenase complex, mitochondrial-like isoform X1 [Solanum lycopersicum]
Solyc06g071000.2	99.353	113.653	0.216733	0.0360125	0.00252513	XP_015079713.1|0.0e+00|delta-1-pyrroline-5-carboxylate dehydrogenase 12A1, mitochondrial [Solanum pennellii]
Solyc04g008730.2	56.83	64.813	0.215963	0.0195017	0.00119133	PHT54098.1|5.6e-222|Alpha-galactosidase [Capsicum baccatum]
Solyc08g081760.1	105.326	120.206	0.214861	0.0125339	0.000698837	XP_004245556.1|0.0e+00|teneurin-m [Solanum lycopersicum]
Solyc02g069100.2	142.93	162.9	0.212701	0.0192258	0.00116942	XP_004233219.1|2.0e-190|cathepsin B-like protease 2 [Solanum lycopersicum]
Solyc02g077410.2	162.8	185.583	0.212682	0.0222933	0.00139815	XP_010316790.1|1.9e-84|28 kDa heat- and acid-stable phosphoprotein [Solanum lycopersicum]
Solyc06g073800.2	318.793	362.81	0.210739	0.0434434	0.00317026	XP_004241368.1|3.8e-88|40S ribosomal protein S11 [Solanum lycopersicum]
Solyc03g118020.2	114.433	129.98	0.20835	0.0235485	0.00149013	XP_004235861.1|0.0e+00|ribonuclease TUDOR 1 [Solanum lycopersicum]
Solyc01g087170.2	70.883	80.593	0.20624	0.0421378	0.00304786	XP_004229627.1|4.8e-267|zinc finger CCCH domain-containing protein 30-like [Solanum lycopersicum]
Solyc04g077870.2	52.51	59.496	0.204744	0.0354404	0.00248074	XP_010320298.1|0.0e+00|calcium-transporting ATPase 1 [Solanum lycopersicum]
Solyc01g096290.2	421.716	477.74	0.204291	0.0477552	0.00357521	XP_021805473.1|6.1e-69|polyubiquitin 11-like [Prunus avium]
Solyc02g014310.2	204.98	232.153	0.204138	0.0436181	0.00318827	NP_001306783.1|0.0e+00|nucleolin-like [Solanum lycopersicum]
Solyc09g091470.2	107.396	121.636	0.203507	0.0430109	0.00313004	NP_001352962.1|5.1e-262|acetyl-CoA C-acetyltranferase 5 [Solanum lycopersicum]
Solyc02g093110.2	173.573	196.596	0.203103	0.0449285	0.00330892	NP_001335348.1|1.7e-93|SUMO-conjugating enzyme SCE1 [Solanum lycopersicum]
Solyc05g043430.2	125.206	141.46	0.199736	0.0468791	0.00348887	XP_004240152.1|5.9e-120|uncharacterized protein LOC101249645 [Solanum lycopersicum]
Solyc12g043120.1	86.673	97.776	0.198425	0.0273844	0.00179456	XP_004252333.1|0.0e+00|heat shock 70 kDa protein 15-like [Solanum lycopersicum]
Solyc11g062130.1	1039.01	1170.38	0.196482	0.0241299	0.00153664	NP_001234018.2|6.3e-220|ADP/ATP translocator [Solanum lycopersicum]
Solyc06g071500.2	157.613	177.453	0.195625	0.0136738	0.000776158	XP_015079589.1|0.0e+00|probable boron transporter 2 [Solanum pennellii]
Solyc03g116750.2	67.763	76.233	0.193975	0.0452584	0.00334276	XP_004235952.1|0.0e+00|topless-related protein 4 isoform X1 [Solanum lycopersicum]
Solyc01g028810.2	161.74	181.566	0.191436	0.0367987	0.00259358	XP_022872965.1|4.9e-301|ruBisCO large subunit-binding protein subunit beta, chloroplastic [Olea europaea var. sylvestris]
Solyc05g006520.2	191.956	215.386	0.190682	0.0390508	0.00277588	AAG43499.1|4.9e-225|pyruvate dehydrogenase, partial [Solanum lycopersicum]
Solyc03g123610.2	75.616	86.156	0.176952	0.0489634	0.00367747	XP_016562427.1|8.2e-269|PREDICTED: alanine aminotransferase 2-like [Capsicum annuum]
