# Supplementary material for: Comparative Physiological and Transcriptomic Analyses Reveal Altered Fe-Deficiency Responses in Tomato Epimutant Colorless Non-ripening
Source: Front Plant Sci. 2022 Jan 21;12:796893. doi: 10.3389/fpls.2021.796893 (PMC8813752; doi:10.3389/fpls.2021.796893)
Supplement: Supplementary file 13 [file Table_7.xlsx]

## Sheet: Up-regulated DEGs in Cnr roots
Table S7. Up-regulated DEGs in Cnr roots under Fe deficiency condition.
Gene ID	Cnr+Fe FPKM	Cnr-Fe FPKM	Log2 (Cnr-Fe/Cnr+Fe)	Qvalue (Cnr+Fe-vs-Cnr-Fe)	Nr
BGI_novel_G000586	0.013	15.476	6.37862	1.18956e-63
Solyc01g005900.2	1.39	54.53	5.55262	1.15612e-159	XP_004228929.1|1.4e-99|fatty alcohol:caffeoyl-CoA acyltransferase-like [Solanum lycopersicum]
Solyc10g079680.1	0.4	31.24	5.11008	3.29754e-50	XP_004249750.2|5.4e-103|transcription factor bHLH100 [Solanum lycopersicum]
Solyc12g011060.1	0.123	13.786	4.73538	7.53995e-33	XP_010314042.2|3.0e-86|zinc finger Ran-binding domain-containing protein 2-like [Solanum lycopersicum]
Solyc10g005550.1	0.196	9.75	4.0901	1.34472e-23	XP_010327227.1|1.4e-143|transcription factor MYB58 [Solanum lycopersicum]
Solyc12g088970.1	17.423	183.066	3.31026	3.10769e-213	XP_004252778.1|1.1e-310|cytochrome P450 82C4 [Solanum lycopersicum]
Solyc04g008670.1	0.08	2.926	3.296	1.06115e-12	XP_004237179.2|1.2e-209|gibberellin 2-beta-dioxygenase 8-like isoform X1 [Solanum lycopersicum]
Solyc11g045520.1	38.79	405.716	3.29213	2.93812e-175	XP_004250780.1|2.3e-211|feruloyl CoA ortho-hydroxylase 1 [Solanum lycopersicum]
Solyc04g071080.1	6.06	62.606	3.23326	6.25123e-85	XP_015158666.1|3.0e-179|PREDICTED: extensin-1-like [Solanum tuberosum]
Solyc06g083000.1	0	5.1	3.06463	2.7957e-09	XP_019070051.1|2.9e-80|calmodulin-like protein 3 [Solanum lycopersicum]
Solyc03g006720.1	0.916	8.27	3.04618	4.12289e-56	XP_015067989.1|0.0e+00|G-type lectin S-receptor-like serine/threonine-protein kinase SD1-29 isoform X1 [Solanum pennellii]
Solyc12g088280.1	0.13	2.056	2.98329	3.28481e-12	XP_025884470.1|3.8e-113|serine carboxypeptidase-like 2 [Solanum lycopersicum]
Solyc06g008050.2	0.636	6.363	2.98102	2.07096e-25	NP_001307429.1|8.6e-243|probable indole-3-pyruvate monooxygenase YUCCA8 [Solanum lycopersicum]
Solyc01g094910.2	53.636	448.143	2.97013	2.38981e-126	NP_001234329.2|0.0e+00|ferric-chelate reductase [Solanum lycopersicum]
Solyc04g077960.1	1.4	12.776	2.93001	3.24386e-32	XP_004238565.2|3.1e-205|transcription factor bHLH84 [Solanum lycopersicum]
Solyc05g014390.2	0.336	4.016	2.76583	4.99389e-11	XP_018625908.1|3.7e-143|PREDICTED: putative ABC transporter C family member 15 [Nicotiana tomentosiformis]
Solyc10g079660.1	9.87	71.976	2.75092	2.16683e-81	PHU16147.1|2.7e-176|hypothetical protein BC332_17352 [Capsicum chinense]
Solyc11g012700.1	7.46	50.05	2.6592	4.00081e-98	XP_027184321.1|0.0e+00|oligopeptide transporter 3-like [Coffea eugenioides]
Solyc06g067950.2	11.546	76.636	2.61559	9.53003e-65	XP_010322678.2|1.9e-160|acyl-protein thioesterase 2-like isoform X1 [Solanum lycopersicum]
Solyc07g043200.1	9.286	59.51	2.57778	6.77244e-74	XP_004243896.1|1.2e-193|zinc transporter 5-like [Solanum lycopersicum]
Solyc01g111350.2	5.803	35.476	2.53203	7.22641e-96	XP_004231025.1|0.0e+00|protein NUCLEAR FUSION DEFECTIVE 4 [Solanum lycopersicum]
Solyc11g007130.1	17.746	107.566	2.51497	2.39328e-96	XP_015058994.1|2.1e-243|hippocampus abundant transcript-like protein 1 [Solanum pennellii]
Solyc02g069200.1	60.983	344.226	2.42232	1.46083e-122	NP_001234248.1|1.9e-194|iron-regulated transporter 1 precursor [Solanum lycopersicum]
Solyc02g065090.2	1.246	8.113	2.40902	5.5876e-16	XP_004233432.1|1.2e-234|patatin-like protein 1 [Solanum lycopersicum]
Solyc06g066710.1	0.88	10.153	2.36847	1.28301e-06	OIS96555.1|5.4e-41|hypothetical protein A4A49_08815 [Nicotiana attenuata]
Solyc04g074530.2	0.49	3.486	2.34907	2.26358e-13	XP_025886595.1|4.3e-203|alcohol dehydrogenase-like 2 isoform X1 [Solanum lycopersicum]
Solyc08g006860.2	3.523	18.903	2.25832	4.07221e-24	XP_004244530.1|3.1e-215|patatin-02-like [Solanum lycopersicum]
Solyc06g054310.1	2	11.393	2.25828	6.37841e-16	XP_010322261.1|3.6e-150|protein FANTASTIC FOUR 3-like [Solanum lycopersicum]
Solyc02g069190.2	134.75	732.41	2.2497	1.31772e-20	NP_001234252.1|8.8e-196|iron-regulated transporter 2 precursor [Solanum lycopersicum]
Solyc07g009280.2	3.526	19.53	2.24593	1.5138e-12	XP_015081841.1|1.8e-28|defensin-like protein 1 [Solanum pennellii]
Solyc11g018530.1	71.946	342.833	2.18569	7.53176e-107	XP_006351140.1|6.7e-297|PREDICTED: metal transporter Nramp5-like [Solanum tuberosum]
Solyc12g017350.1	20.85	100.5	2.14986	3.05597e-65	XP_009597251.2|5.6e-166|PREDICTED: metal tolerance protein 9-like [Nicotiana tomentosiformis]
Solyc07g014680.2	2.276	11.103	2.12696	1.29564e-20	CCJ09642.1|2.3e-113|Na+ transporter [Solanum lycopersicum var. cerasiforme]
Solyc06g060310.2	0.446	2.376	2.09526	4.95698e-11	XP_004242029.1|0.0e+00|chlorophyllide a oxygenase, chloroplastic [Solanum lycopersicum]
Solyc01g091870.2	0.736	3.676	2.09446	1.5138e-12	XP_006339492.1|0.0e+00|PREDICTED: SPX domain-containing membrane protein At4g22990-like isoform X2 [Solanum tuberosum]
Solyc11g069750.1	0.19	1.493	2.0459	4.98154e-05	XP_009621124.1|1.3e-279|PREDICTED: high affinity nitrate transporter 2.4-like [Nicotiana tomentosiformis]
Solyc08g007540.2	20.673	89.593	2.03443	4.59869e-53	XP_004244583.1|1.3e-253|ACT domain-containing protein ACR8 [Solanum lycopersicum]
Solyc08g061010.2	1.096	6.306	2.00738	3.11652e-06	XP_004245323.1|7.3e-147|protein NRT1/ PTR FAMILY 6.2-like [Solanum lycopersicum]
BGI_novel_G000334	0.126	2.846	1.99964	0.000536365
Solyc07g062870.2	1.113	5.466	1.96934	1.06433e-07	XP_004244249.1|1.9e-96|30S ribosomal protein S20, chloroplastic [Solanum lycopersicum]
Solyc09g014560.1	0.87	5.03	1.94931	2.90694e-09	XP_010325794.1|8.1e-31|kirola-like [Solanum lycopersicum]
Solyc07g045160.2	3.956	16.58	1.9479	2.48741e-28	XP_004243600.1|2.3e-298|ATP-dependent 6-phosphofructokinase 6 isoform X1 [Solanum lycopersicum]
Solyc04g005640.2	2.253	10.333	1.94048	5.29459e-12	XP_004237041.1|3.1e-142|extracellular ribonuclease LE-like [Solanum lycopersicum]
Solyc04g074540.2	0.193	1.37	1.93394	0.000163286	XP_015072969.1|1.4e-219|alcohol dehydrogenase-like 1 [Solanum pennellii]
Solyc12g094470.1	1.163	5.116	1.92407	1.49338e-11	XP_016549721.1|1.3e-271|PREDICTED: L-ascorbate oxidase homolog [Capsicum annuum]
Solyc01g017720.1	1.813	7.686	1.90747	4.53707e-14
Solyc12g017340.1	5.956	28.963	1.90614	6.17603e-07	XP_004251958.1|2.0e-31|metal tolerance protein 9 [Solanum lycopersicum]
Solyc11g039570.1	1.523	6.406	1.84282	7.54055e-10	XP_010313021.1|2.1e-198|peroxidase 44-like [Solanum lycopersicum]
Solyc02g085880.1	3.38	13.003	1.83409	7.92532e-21	NP_001266171.1|3.5e-279|cytokinin hydroxylase-like [Solanum lycopersicum]
Solyc01g005370.2	6.003	23.57	1.83232	6.18616e-17	XP_004228711.1|8.1e-93|probable calcium-binding protein CML25 [Solanum lycopersicum]
Solyc07g009520.1	1.443	5.97	1.82877	6.91976e-10	XP_025887682.1|6.0e-257|WEB family protein At4g27595, chloroplastic-like isoform X2 [Solanum lycopersicum]
Solyc02g068170.1	0.923	5.39	1.80628	0.000354236	PHU25600.1|2.4e-46|hypothetical protein BC332_03932 [Capsicum chinense]
Solyc06g053930.2	8.73	33.226	1.7946	1.4367e-17	XP_004241038.1|3.9e-78|calmodulin-like protein 8 [Solanum lycopersicum]
Solyc07g065420.1	4.39	16.84	1.78027	1.10099e-13	XP_019070548.1|1.9e-134|protein MIZU-KUSSEI 1 [Solanum lycopersicum]
Solyc10g006920.2	2.053	7.686	1.76339	3.01937e-14	XP_004248503.1|5.0e-224|CBS domain-containing protein CBSX5 [Solanum lycopersicum]
Solyc01g091250.2	0.363	2.106	1.74985	0.00081905	XP_010325703.1|4.1e-120|uncharacterized protein LOC104649008 [Solanum lycopersicum]
Solyc09g014310.2	0.023	0.79	1.74551	0.00350855	XP_004246335.2|8.7e-181|desiccation-related protein PCC13-62-like [Solanum lycopersicum]
Solyc08g075520.2	26.713	92.886	1.74038	1.17015e-83	XP_004246001.1|1.2e-264|uncharacterized protein LOC101249748 isoform X1 [Solanum lycopersicum]
Solyc10g081780.1	2.65	10.7	1.72515	6.99055e-07	XP_015055251.1|1.5e-88|RING-H2 finger protein ATL70-like [Solanum pennellii]
Solyc04g082120.2	0.613	2.266	1.72209	1.00601e-08	XP_016568312.1|0.0e+00|PREDICTED: prolyl endopeptidase [Capsicum annuum]
Solyc03g119300.2	2.383	8.22	1.7185	1.13027e-30	XP_004235751.1|0.0e+00|zinc finger protein BRUTUS isoform X1 [Solanum lycopersicum]
Solyc08g005790.2	1.123	4.303	1.71723	1.82332e-07	XP_004244682.2|3.1e-222|pectin acetylesterase 8-like [Solanum lycopersicum]
Solyc11g005290.1	4.793	19.49	1.71326	3.68679e-06	XP_004250440.1|4.5e-119|RING-H2 finger protein ATL78-like [Solanum lycopersicum]
Solyc12g008990.1	1.51	5.353	1.71054	1.64786e-19	XP_004252067.1|0.0e+00|U-box domain-containing protein 34 [Solanum lycopersicum]
Solyc02g094860.1	10.9	39.08	1.70962	1.11176e-37	NP_001266167.1|2.6e-281|cytokinin hydroxylase-like [Solanum lycopersicum]
Solyc06g071220.1	0.436	4.553	1.7065	0.0043746	XP_015167499.1|7.0e-65|PREDICTED: uncharacterized protein LOC107061957 [Solanum tuberosum]
Solyc09g008020.2	15.55	53.526	1.69078	3.40535e-36	XP_004246644.1|2.0e-206|OTU domain-containing protein DDB_G0284757 [Solanum lycopersicum]
Solyc06g083930.1	0.65	3.59	1.67965	0.00170186	XP_004242534.1|1.2e-110|LOB domain-containing protein 16 [Solanum lycopersicum]
Solyc02g063520.2	2.843	10.066	1.67054	2.56249e-11	XP_010317182.1|5.5e-139|homeobox-leucine zipper protein HAT22 [Solanum lycopersicum]
Solyc10g079650.1	9.026	31.18	1.66935	2.20405e-17	XP_004249748.1|4.4e-137|transcription factor bHLH100-like [Solanum lycopersicum]
Solyc06g031710.2	2.286	8.246	1.66825	7.64009e-09	XP_004240770.1|4.5e-204|WAT1-related protein At2g39510 [Solanum lycopersicum]
Solyc06g064990.2	3.016	10.556	1.66512	9.34601e-13	XP_004242242.1|1.9e-227|GDSL esterase/lipase 5-like [Solanum lycopersicum]
Solyc11g005300.1	2.746	10.336	1.64299	3.05276e-06	XP_004250441.1|1.2e-125|RING-H2 finger protein ATL78-like [Solanum lycopersicum]
Solyc01g080230.2	17.09	55.666	1.628	1.57756e-35	XP_025886743.1|9.9e-143|endo-1,3;1,4-beta-D-glucanase [Solanum lycopersicum]
BGI_novel_G000436	0.293	1.48	1.62647	0.00234551
Solyc01g067370.2	5.166	17.023	1.59842	1.27087e-13	NP_001234726.1|3.9e-124|uncharacterized protein LOC543717 [Solanum lycopersicum]
Solyc11g005280.1	8.603	28.946	1.58381	2.83448e-09	XP_004249864.1|1.2e-116|RING-H2 finger protein ATL78-like [Solanum lycopersicum]
Solyc01g028800.1	0.336	1.243	1.57888	2.43834e-05	XP_004228945.2|0.0e+00|pumilio homolog 12 [Solanum lycopersicum]
BGI_novel_G000280	49.486	155.096	1.57789	2.25438e-31
Solyc03g083420.2	10.95	33.813	1.5756	1.40799e-47	XP_004234957.1|0.0e+00|probable plastid-lipid-associated protein 14, chloroplastic isoform X1 [Solanum lycopersicum]
BGI_novel_G000668	0	0.783	1.56812	0.009252
Solyc01g098140.2	2.923	9.263	1.54303	7.93059e-12	NP_001352297.1|6.6e-189|alpha/beta hydrolase [Solanum lycopersicum]
BGI_novel_G000003	49.803	153.716	1.53409	6.68637e-21
Solyc04g081650.2	0	1.103	1.52821	0.0115497	XP_006342132.1|1.8e-58|PREDICTED: G2/mitotic-specific cyclin-2-like [Solanum tuberosum]
Solyc10g083820.1	0.113	1.876	1.50967	0.0147493	XP_015055289.1|1.6e-78|probable pectinesterase 15 [Solanum pennellii]
Solyc10g005190.1	10.413	31.8	1.50748	1.29017e-15	XP_010327243.1|9.0e-170|uncharacterized protein LOC104649498 [Solanum lycopersicum]
Solyc10g007600.2	3.123	9.826	1.50473	3.06391e-07	NP_001334906.1|1.1e-206|glycolate oxidase [Solanum lycopersicum]
Solyc07g045060.1	2.01	8.996	1.50304	0.00512074	OIT27627.1|3.3e-30|hypothetical protein A4A49_54847 [Nicotiana attenuata]
Solyc01g100920.2	6.49	19.376	1.50219	2.28084e-23	XP_004230335.1|4.4e-213|WAT1-related protein At1g09380 [Solanum lycopersicum]
Solyc01g005630.1	6.616	20.366	1.49669	7.88241e-12	XP_004228934.1|1.9e-110|ethylene-responsive transcription factor ERN1-like [Solanum lycopersicum]
Solyc01g099990.2	0.18	1	1.48838	0.0132375	XP_004230265.1|1.7e-166|F-box protein PP2-B15 [Solanum lycopersicum]
Solyc09g009480.1	1.046	4.323	1.48729	0.00406519	XP_004246543.1|1.1e-94|uncharacterized protein LOC101262845 [Solanum lycopersicum]
Solyc06g075450.1	0.46	1.616	1.47851	0.000600168	XP_010322390.1|6.6e-311|protein NRT1/ PTR FAMILY 2.7-like [Solanum lycopersicum]
Solyc10g007290.2	83.383	237.65	1.46343	1.78882e-70	XP_009598007.1|0.0e+00|PREDICTED: phosphoenolpyruvate carboxylase [Nicotiana tomentosiformis]
Solyc06g082770.2	1.783	5.83	1.46166	5.45326e-05	XP_019070085.1|4.8e-104|LOB domain-containing protein 24-like isoform X1 [Solanum lycopersicum]
Solyc05g015350.2	0.096	0.55	1.45809	0.0176948	XP_004239209.1|2.0e-302|cytochrome P450 78A5-like [Solanum lycopersicum]
Solyc04g071100.1	103.036	303.396	1.44742	8.78223e-25	XP_025886563.1|4.9e-57|extensin-3-like [Solanum lycopersicum]
Solyc03g097860.1	0.093	0.473	1.44223	0.0163152	XP_015159195.1|0.0e+00|PREDICTED: potassium transporter 2-like [Solanum tuberosum]
Solyc03g098060.1	0.146	1.453	1.44049	0.024179	XP_004235372.1|2.8e-101|zinc-finger homeodomain protein 9-like [Solanum lycopersicum]
Solyc01g066290.2	2.32	7.816	1.43947	0.000514234	PHT94163.1|4.6e-28|hypothetical protein T459_02045 [Capsicum annuum]
Solyc03g120410.1	0	1.38	1.42899	0.0192525	XP_004235694.1|2.7e-92|protein CDI [Solanum lycopersicum]
Solyc01g079180.2	1.236	3.95	1.4219	0.000223029	XP_004229371.1|8.2e-228|probable pectinesterase 53 [Solanum lycopersicum]
Solyc05g014720.2	0	0.763	1.41999	0.0204136	XP_010320982.1|1.5e-94|DNA topoisomerase 3-alpha isoform X1 [Solanum lycopersicum]
Solyc02g092550.2	27.76	76.853	1.4024	1.41858e-29	XP_004231911.1|1.5e-124|LOB domain-containing protein 37 [Solanum lycopersicum]
Solyc08g014230.2	0	0.273	1.39915	0.0227261	XP_006366147.1|5.6e-195|PREDICTED: 2-isopropylmalate synthase A-like isoform X1 [Solanum tuberosum]
Solyc04g080330.2	0.176	0.986	1.39739	0.0269657	XP_004238604.1|2.7e-207|peroxidase 10-like [Solanum lycopersicum]
Solyc10g074840.1	112.83	320.893	1.38778	3.25311e-25	OIT02504.1|1.1e-28|hypothetical protein A4A49_18263 [Nicotiana attenuata]
Solyc03g112260.2	0.153	0.673	1.37926	0.021997	XP_015068543.1|4.2e-254|protein DETOXIFICATION 16-like [Solanum pennellii]
Solyc09g064910.1	8.2	22.71	1.37516	3.68434e-13	NP_001244915.1|4.4e-179|adenylate isopentenyltransferase [Solanum lycopersicum]
Solyc01g096140.2	7.3	19.823	1.3668	6.86589e-18	XP_004229999.1|1.2e-284|aluminum-activated malate transporter 10 [Solanum lycopersicum]
Solyc02g093270.2	204.033	547.166	1.3633	8.88962e-39	NP_001307032.1|6.2e-137|caffeoyl-CoA O-methyltransferase-like [Solanum lycopersicum]
Solyc01g009400.2	7.256	20.13	1.35428	5.865e-09	XP_004228866.1|1.5e-188|peroxidase 60-like [Solanum lycopersicum]
Solyc02g063410.2	27.42	75.62	1.35165	3.24712e-12	XP_004233959.1|2.8e-73|uncharacterized protein At5g65660-like [Solanum lycopersicum]
Solyc02g091070.2	0.483	1.563	1.35048	0.00376639	XP_009776776.1|5.6e-237|PREDICTED: MATE efflux family protein 5-like [Nicotiana sylvestris]
Solyc02g091820.1	0.093	0.71	1.34984	0.0390503	XP_004233614.1|8.9e-183|transcription factor bHLH18-like [Solanum lycopersicum]
Solyc05g014380.2	1.64	4.393	1.33813	1.6402e-12	XP_004239178.1|0.0e+00|putative ABC transporter C family member 15 [Solanum lycopersicum]
Solyc01g108700.2	6.323	18.003	1.33104	1.15213e-05	XP_009786559.1|1.1e-06|PREDICTED: uncharacterized protein LOC104234657 [Nicotiana sylvestris]
Solyc11g006670.1	1.256	3.976	1.328	0.00364375	XP_004250469.4|4.5e-139|transcription repressor OFP13 [Solanum lycopersicum]
Solyc06g071700.1	1.443	3.906	1.32682	1.1597e-08	XP_016578261.1|0.0e+00|PREDICTED: primary amine oxidase-like isoform X1 [Capsicum annuum]
Solyc05g014590.2	0.08	0.71	1.31046	0.0473277	XP_004239187.1|1.9e-123|transcription factor bHLH35 isoform X1 [Solanum lycopersicum]
Solyc05g052240.2	0.166	1.013	1.30696	0.0475186	XP_010321455.1|2.0e-114|probable chalcone--flavonone isomerase 3 [Solanum lycopersicum]
Solyc02g065190.2	2.11	5.68	1.30236	5.06401e-07	XP_004233427.1|5.2e-287|geraniol 8-hydroxylase [Solanum lycopersicum]
BGI_novel_G000468	1.636	4.673	1.29904	0.000338161
Solyc08g007550.1	0.576	2.246	1.29768	0.0222954	XP_006358404.1|1.7e-10|PREDICTED: LRR receptor-like serine/threonine-protein kinase FLS2 [Solanum tuberosum]
Solyc02g086300.2	14.803	41.08	1.29724	8.66348e-05	XP_004232334.1|1.7e-244|putative glutamine amidotransferase GAT1_2.1 [Solanum lycopersicum]
Solyc01g099840.2	117.953	303.42	1.29714	1.05326e-22	XP_004230256.1|1.6e-66|dormancy-associated protein homolog 3 [Solanum lycopersicum]
Solyc05g053120.1	1.186	3.286	1.29154	0.000111081	XP_004240219.1|3.9e-272|zeatin O-xylosyltransferase-like [Solanum lycopersicum]
Solyc08g006100.2	25.293	64.81	1.28863	2.50329e-21	XP_004244468.1|1.2e-136|uncharacterized protein LOC101259062 [Solanum lycopersicum]
Solyc02g082150.1	6.79	17.833	1.28801	1.76422e-09	XP_010316504.1|1.7e-200|uncharacterized protein LOC104645781 [Solanum lycopersicum]
Solyc10g080920.1	2.093	6.333	1.28716	0.00404125	XP_004249320.1|7.0e-48|protein RADIALIS-like 1 [Solanum lycopersicum]
Solyc03g005980.2	16.553	42.7	1.28448	4.63735e-12	XP_004234073.1|1.2e-154|aquaporin NIP1-1 [Solanum lycopersicum]
Solyc02g089620.2	24.863	63.233	1.28131	4.0653e-18	XP_015066286.1|1.1e-282|proline dehydrogenase 2, mitochondrial-like [Solanum pennellii]
Solyc07g049560.2	9.343	23.533	1.28093	2.62474e-17	XP_015080323.1|9.4e-132|tyrosine-protein phosphatase DSP1 [Solanum pennellii]
Solyc03g095370.2	1.39	3.82	1.2754	2.65411e-08
Solyc03g043930.2	0.886	2.483	1.27536	0.000758194	XP_004234646.1|3.3e-238|heptahelical transmembrane protein 4-like [Solanum lycopersicum]
Solyc05g051820.2	0.35	1.486	1.26892	0.0457312	XP_004239997.1|2.3e-84|heavy metal-associated isoprenylated plant protein 23-like [Solanum lycopersicum]
Solyc03g122320.1	5.603	17.2	1.26659	0.00690757	XP_010318472.2|4.1e-58|uncharacterized protein LOC104646525 [Solanum lycopersicum]
Solyc03g117800.2	0.196	0.65	1.26182	0.0214762	XP_015068375.1|0.0e+00|very-long-chain aldehyde decarbonylase CER3-like isoform X2 [Solanum pennellii]
Solyc06g075970.2	14.183	35.716	1.25601	5.29459e-12	XP_004241239.1|0.0e+00|uncharacterized protein LOC101251992 [Solanum lycopersicum]
Solyc04g011780.1	0	1.88	1.22891	0.0489939	XP_025886239.1|2.0e-51|monothiol glutaredoxin-S1-like [Solanum lycopersicum]
Solyc04g079080.2	2.5	6.703	1.22799	0.000270222	XP_015072819.1|3.1e-62|calmodulin-like protein 4 [Solanum pennellii]
Solyc01g097570.2	54.456	135.41	1.22775	2.22736e-13	OSX73063.1|3.8e-11|hypothetical protein BU14_0381s0004 [Porphyra umbilicalis]
Solyc02g078130.2	0.89	2.786	1.22361	0.0227261	XP_004233835.1|4.0e-106|transcription factor bHLH162 [Solanum lycopersicum]
Solyc05g005040.2	2.69	6.736	1.21601	4.15948e-07	XP_004239337.3|2.3e-291|polygalacturonase At1g48100 [Solanum lycopersicum]
Solyc11g012360.1	4.94	12.27	1.21529	5.60934e-08	NP_001266027.1|0.0e+00|tonoplast dicarboxylate transporter-like [Solanum lycopersicum]
Solyc05g010060.2	1.386	3.466	1.2117	6.64899e-07	XP_006348589.1|0.0e+00|PREDICTED: phosphate transporter PHO1 homolog 1 [Solanum tuberosum]
Solyc10g005680.1	0.16	0.546	1.20755	0.0451938	XP_006352570.1|0.0e+00|PREDICTED: probable WRKY transcription factor 2 [Solanum tuberosum]
Solyc05g051880.2	2.166	5.21	1.2075	5.85526e-06	XP_019069377.1|1.0e-173|probable trehalose-phosphate phosphatase H isoform X3 [Solanum lycopersicum]
Solyc08g080060.2	24.066	59.056	1.20407	1.28561e-10	XP_004245667.2|3.2e-159|expansin-A18 [Solanum lycopersicum]
Solyc03g120650.2	1.903	4.746	1.20394	1.59434e-06	NP_001234159.1|3.5e-287|pollen-specific kinase partner protein [Solanum lycopersicum]
Solyc06g071290.2	0.423	1.206	1.20164	0.0123706	NP_001333606.1|6.9e-293|putative betaine aldehyde dehyrogenase [Solanum lycopersicum]
Solyc10g079230.1	3.013	7.41	1.20106	5.32033e-08	XP_004249736.1|4.4e-287|UPF0481 protein At3g47200 [Solanum lycopersicum]
Solyc06g059990.2	0.856	2.66	1.19594	0.010755	XP_010322941.1|5.3e-158|dimethylallylcistransferase, chloroplastic-like [Solanum lycopersicum]
Solyc07g043700.1	7.933	19.123	1.19032	5.044e-12	XP_004243890.1|2.9e-250|acylsugar acyltransferase 3-like [Solanum lycopersicum]
Solyc11g068370.1	23.323	54.973	1.17447	6.12809e-18	XP_010313358.1|1.0e-198|transcription factor TGA9-like isoform X2 [Solanum lycopersicum]
Solyc03g118930.2	3.2	7.656	1.16621	4.72183e-08	XP_004236427.1|2.2e-268|uncharacterized protein LOC101243978 [Solanum lycopersicum]
Solyc05g051810.1	107.283	255.223	1.16504	1.26795e-12	OIT28104.1|4.8e-20|hypothetical protein A4A49_20662 [Nicotiana attenuata]
Solyc07g051860.1	0.613	1.786	1.1574	0.0333827	XP_004243854.1|5.4e-188|mitogen-activated protein kinase kinase kinase 18-like [Solanum lycopersicum]
Solyc12g100090.1	17.166	40.393	1.15664	2.79837e-11	XP_004252858.1|5.4e-224|protein PELPK1-like [Solanum lycopersicum]
Solyc06g033860.1	0.72	1.946	1.15176	0.0147102	O04937.1|4.2e-222|RecName: Full=Glutamate dehydrogenase A; Short=GDH A
Solyc06g075660.2	26.716	61.676	1.15054	1.69958e-20	NP_001310217.1|1.8e-108|transcription factor MYB48-like [Solanum lycopersicum]
Solyc06g036110.1	18.086	42.346	1.14706	1.19102e-12	XP_004240724.1|6.9e-143|uncharacterized protein LOC101263030 [Solanum lycopersicum]
Solyc06g049020.1	42.836	111.916	1.14685	0.00771457	XP_004240863.1|2.4e-123|uncharacterized protein LOC101254906 [Solanum lycopersicum]
Solyc08g007070.2	15.613	36.746	1.14433	1.45331e-08	XP_004244546.1|1.7e-29|protein NRT1/ PTR FAMILY 7.3 [Solanum lycopersicum]
Solyc04g011680.1	0.566	1.526	1.1411	0.017454	XP_006346716.1|1.2e-266|PREDICTED: cytochrome P450 CYP736A12-like [Solanum tuberosum]
Solyc12g049170.1	52.033	126.536	1.14107	0.000130008	XP_025884520.1|1.4e-194|protein PELPK1-like [Solanum lycopersicum]
Solyc02g094370.1	0.463	1.193	1.12845	0.0109978	XP_010315905.1|0.0e+00|exocyst complex component EXO70B1 [Solanum lycopersicum]
BGI_novel_G000163	3.276	7.893	1.12698	0.000179767
Solyc06g062420.2	9.066	21.396	1.12162	4.11955e-06	ESR40080.1|1.3e-06|hypothetical protein CICLE_v10026890mg [Citrus clementina]
Solyc05g050880.2	17.636	40.056	1.11979	4.0912e-17	XP_004240055.1|4.6e-176|cationic peroxidase 1-like [Solanum lycopersicum]
Solyc08g062570.1	1.516	3.456	1.11775	0.0303775	PHT55406.1|4.1e-44|hypothetical protein CQW23_03892 [Capsicum baccatum]
BGI_novel_G000595	0.596	1.456	1.11751	0.00513662
Solyc05g014290.2	6.81	16.036	1.11638	1.16059e-05	XP_004239173.1|6.6e-129|transcription factor MYB20 [Solanum lycopersicum]
Solyc07g061880.1	9.15	21.62	1.1099	1.83783e-05	XP_010324449.1|5.1e-88|prostatic spermine-binding protein-like [Solanum lycopersicum]
Solyc08g081790.1	1.693	4.523	1.10904	0.0254801	XP_004245553.1|1.1e-105|disease resistance response protein 206-like [Solanum lycopersicum]
Solyc10g086700.1	4.13	9.42	1.10703	1.89301e-08	XP_004249673.1|1.7e-68|uncharacterized protein LOC101251531 [Solanum lycopersicum]
Solyc11g007250.1	0.523	1.416	1.10457	0.036381	XP_004249986.1|3.1e-274|serine/threonine-protein kinase D6PKL2-like [Solanum lycopersicum]
Solyc06g061200.1	779.956	1714.29	1.10238	1.52395e-33	AAP83840.1|6.8e-185|glycine-rich protein TomR2 [Solanum lycopersicum]
Solyc06g008560.1	3.293	7.583	1.10008	1.26955e-07	XP_025887192.1|3.7e-292|LOW QUALITY PROTEIN: uncharacterized protein LOC101266228 [Solanum lycopersicum]
Solyc08g007780.2	13.66	31.046	1.09991	4.09093e-09	XP_004244597.1|6.7e-67|expansin-A18 [Solanum lycopersicum]
Solyc09g009540.2	38.45	86.146	1.09966	7.70382e-15	NP_001311372.1|8.0e-214|alpha/beta-hydrolases superfamily protein precursor [Solanum lycopersicum]
Solyc11g020960.1	13.4	31.256	1.09871	8.83367e-06	XP_004250426.1|1.1e-84|wound-induced proteinase inhibitor 2 [Solanum lycopersicum]
Solyc04g056450.2	0.366	0.923	1.09286	0.0174144	PHT39121.1|1.7e-270|hypothetical protein CQW23_22694 [Capsicum baccatum]
Solyc06g076910.1	0.926	2.176	1.08626	0.00126188	XP_004242063.1|0.0e+00|putative receptor-like protein kinase At3g47110 [Solanum lycopersicum]
Solyc02g076990.2	1.19	2.856	1.08388	0.00466258	XP_004232966.1|1.6e-230|phospholipase A1-IIgamma-like [Solanum lycopersicum]
Solyc05g052890.2	8.12	18.556	1.08098	0.000280322	XP_004239920.1|2.9e-78|uncharacterized protein LOC101251381 [Solanum lycopersicum]
BGI_novel_G000488	0.793	1.946	1.07476	0.013148
Solyc08g081470.2	1.993	4.9	1.07321	0.0137372	XP_004245571.1|1.8e-54|protein SPIRAL1-like 5 [Solanum lycopersicum]
Solyc06g075570.1	10.036	22.02	1.07	1.75127e-13	XP_019069949.1|0.0e+00|putative respiratory burst oxidase homolog protein H [Solanum lycopersicum]
Solyc08g065190.2	39.573	86.1	1.06773	1.50397e-27	XP_004245100.1|3.9e-230|zinc transporter 4, chloroplastic [Solanum lycopersicum]
Solyc06g036460.2	1.253	2.79	1.06158	0.0401092	XP_004240709.1|3.9e-75|probable membrane-associated kinase regulator 6 [Solanum lycopersicum]
Solyc03g116910.2	6.713	14.766	1.06109	2.62334e-08	XP_006341347.1|9.5e-186|PREDICTED: cinnamoyl CoA reductase isoform X1 [Solanum tuberosum]
Solyc12g049150.1	38.946	89.516	1.05836	0.00101448	XP_019066871.1|3.6e-267|protein PELPK1 [Solanum lycopersicum]
Solyc11g007140.1	12.196	25.836	1.05787	1.15214e-16	XP_004250476.1|6.1e-182|hippocampus abundant transcript-like protein 1 isoform X1 [Solanum lycopersicum]
Solyc05g024340.1	1.433	3.293	1.05713	0.00144136	XP_004239306.1|0.0e+00|exocyst complex component EXO70B1-like [Solanum lycopersicum]
Solyc10g008120.2	44.65	104.82	1.05647	0.00585099	XP_004248183.1|2.7e-209|probable O-methyltransferase 3 [Solanum lycopersicum]
Solyc06g007650.1	8.713	19.086	1.05482	2.17211e-09	XP_010321783.1|9.1e-274|UDP-glycosyltransferase 74F2-like [Solanum lycopersicum]
Solyc10g045100.1	3.93	8.92	1.05339	0.000312301	XP_004248834.1|4.5e-142|phosphoglycerate mutase-like protein AT74 [Solanum lycopersicum]
Solyc06g068310.1	4.57	10.573	1.0513	0.00203161	XP_004242201.1|8.1e-107|uncharacterized protein LOC101267246 [Solanum lycopersicum]
Solyc06g084330.2	0.613	1.436	1.04921	0.00811018	PHT46983.1|0.0e+00|hypothetical protein CQW23_16141 [Capsicum baccatum]
Solyc02g082090.2	105.766	239.31	1.04761	0.000476802	XP_004232608.1|3.3e-187|peroxidase 7 [Solanum lycopersicum]
Solyc01g096410.2	1.686	3.72	1.04627	1.57484e-05	XP_004230026.1|0.0e+00|phosphatidylinositol 4-phosphate 5-kinase 6-like [Solanum lycopersicum]
Solyc08g008420.2	3.69	8.13	1.04481	2.94054e-05	XP_004244641.1|1.7e-55|mitochondrial pyruvate carrier 1 isoform X1 [Solanum lycopersicum]
Solyc01g102940.2	10.016	21.286	1.03592	8.24616e-17	XP_004230406.1|0.0e+00|methionine S-methyltransferase [Solanum lycopersicum]
Solyc04g080820.2	2.46	5.323	1.02573	1.013e-05	NP_001266251.1|1.0e-308|cytokinin oxidase/dehydrogenase-like precursor [Solanum lycopersicum]
Solyc08g067700.1	14.216	30.806	1.02568	5.53089e-07	PSS01157.1|2.0e-33|ATP-dependent RNA helicase ddx56 [Actinidia chinensis var. chinensis]
Solyc06g007910.2	13.706	29.733	1.02528	3.50722e-07	PHT63578.1|2.7e-51|hypothetical protein T459_32587 [Capsicum annuum]
Solyc04g079910.2	12.383	26.266	1.02322	9.25439e-14	XP_004238222.1|9.0e-188|calcium uniporter protein 4, mitochondrial [Solanum lycopersicum]
Solyc05g050890.1	6.933	15.956	1.02297	0.00584731	XP_019069546.1|2.5e-70|cationic peroxidase 1-like [Solanum lycopersicum]
Solyc01g100270.2	6.07	12.933	1.02261	5.61037e-13	XP_010313383.1|0.0e+00|uncharacterized protein LOC101268229 isoform X1 [Solanum lycopersicum]
Solyc05g008020.2	1.056	2.563	1.01964	0.00305099	XP_009604010.1|1.1e-257|PREDICTED: mitogen-activated protein kinase 9 isoform X2 [Nicotiana tomentosiformis]
Solyc06g008930.2	8.85	19.343	1.01838	2.88022e-05	XP_004240531.1|7.0e-71|uncharacterized protein LOC101254903 [Solanum lycopersicum]
Solyc03g059080.1	8.183	17.46	1.0158	8.2196e-08	XP_010317882.1|3.2e-213|probable protein kinase At2g41970 isoform X1 [Solanum lycopersicum]
Solyc05g007570.2	3.293	7.003	1.0146	2.64331e-11	XP_004238800.1|0.0e+00|uncharacterized protein LOC101267021 [Solanum lycopersicum]
Solyc09g057760.2	1.09	2.48	1.01083	0.00920286	XP_015170701.1|1.7e-54|PREDICTED: uncharacterized protein LOC107063386 [Solanum tuberosum]
Solyc03g111710.2	131.06	291.74	1.00984	0.00347673	XP_004236301.1|8.9e-202|BTB/POZ and TAZ domain-containing protein 1 [Solanum lycopersicum]
Solyc05g046130.2	53.713	113.233	1.00926	6.28232e-16	XP_004240138.1|9.8e-85|uncharacterized protein LOC101243788 [Solanum lycopersicum]
Solyc03g007360.2	7.71	16.403	1.00813	3.20891e-07	XP_004234178.1|1.9e-143|bidirectional sugar transporter SWEET3b isoform X2 [Solanum lycopersicum]
Solyc12g100300.1	10.28	21.686	1.00605	2.13019e-09	XP_004253139.1|6.3e-223|metal tolerance protein 4-like [Solanum lycopersicum]
Solyc03g121300.2	2.206	5.073	1.00282	0.0322572	XP_004235622.1|1.2e-114|jacalin-related lectin 19 [Solanum lycopersicum]
0<Log2<1
Solyc04g025040.1	59.956	124.973	0.999821	3.17382e-22	XP_004237241.1|4.1e-145|RNA-binding protein FUS [Solanum lycopersicum]
Solyc01g091050.2	0.663	1.563	0.995664	0.0427242	XP_010325628.1|1.4e-309|pectinesterase 2 [Solanum lycopersicum]
Solyc03g112540.2	4.09	8.75	0.994112	0.000223029	XP_004236241.1|8.2e-184|short-chain dehydrogenase TIC 32, chloroplastic [Solanum lycopersicum]
Solyc10g080600.1	1.946	4.466	0.993357	0.0217684	XP_004249295.1|2.5e-134|zinc finger protein GIS [Solanum lycopersicum]
Solyc07g008380.1	1.79	3.896	0.991237	0.00411288	XP_010323479.1|3.5e-262|salutaridinol 7-O-acetyltransferase-like [Solanum lycopersicum]
Solyc03g031590.2	57.133	117.526	0.990877	6.99942e-26	XP_004234470.1|1.2e-215|S-type anion channel SLAH1-like [Solanum lycopersicum]
Solyc07g007900.1	3.403	7.47	0.990856	0.000259378	XP_025886755.1|4.1e-128|nucleolar and coiled-body phosphoprotein 1-like [Solanum lycopersicum]
Solyc06g035980.2	27.833	58.5	0.987952	1.15694e-07	XP_004240732.1|1.2e-71|actin-depolymerizing factor 7 [Solanum lycopersicum]
Solyc06g060590.2	8.69	18.19	0.987321	7.71593e-07	XP_004242009.1|1.4e-141|bidirectional sugar transporter SWEET1 [Solanum lycopersicum]
BGI_novel_G000063	1.32	3.03	0.986832	0.0281304
Solyc02g078600.2	0.97	2.106	0.983979	0.00422333	PSS24657.1|5.7e-232|Polyol transporter like [Actinidia chinensis var. chinensis]
Solyc09g075900.2	12.303	25.35	0.982972	5.0109e-13	XP_004247364.1|2.2e-194|thermospermine synthase ACAULIS5-like [Solanum lycopersicum]
Solyc05g008370.1	10.13	21.243	0.981535	4.48056e-06	XP_004238861.1|3.2e-146|probable ribose-5-phosphate isomerase 2 [Solanum lycopersicum]
Solyc02g083490.2	17.946	37.036	0.979897	1.56795e-09	XP_004232514.1|5.4e-181|peroxidase 64 [Solanum lycopersicum]
Solyc01g060040.2	1.11	2.376	0.976642	0.00452798	XP_010318937.1|0.0e+00|bromodomain and WD repeat-containing protein 3 [Solanum lycopersicum]
Solyc10g085170.1	2.353	5.233	0.97613	0.0156312	XP_004249820.1|1.5e-148|GDSL esterase/lipase CPRD49-like [Solanum lycopersicum]
Solyc01g091030.2	7.246	15.006	0.973679	7.30611e-07	XP_004229795.1|2.9e-89|auxin-induced protein 10A5 [Solanum lycopersicum]
Solyc12g100110.1	38.76	80.186	0.973675	2.35266e-08	XP_019066847.1|1.7e-247|protein PELPK1-like [Solanum lycopersicum]
Solyc01g009870.2	0.883	1.976	0.972595	0.0242095	XP_004228433.1|7.6e-224|glycerophosphodiester phosphodiesterase GDPD3-like isoform X1 [Solanum lycopersicum]
BGI_novel_G000332	68.736	143.52	0.972495	2.35899e-09
Solyc06g072400.1	15.873	32.053	0.970618	7.15387e-17	XP_019069743.1|9.8e-118|type IV inositol polyphosphate 5-phosphatase 9-like isoform X2 [Solanum lycopersicum]
Solyc11g005270.1	2.086	4.816	0.968749	0.044893	XP_004249863.1|6.1e-107|uncharacterized protein At5g39865-like [Solanum lycopersicum]
Solyc05g021390.2	26.01	52.656	0.967128	7.25624e-20	XP_015075803.1|4.3e-283|beta-amyrin 28-monooxygenase-like [Solanum pennellii]
Solyc04g048900.2	18.22	37.063	0.966257	1.42259e-13	XP_004237555.1|1.8e-254|calreticulin-3-like [Solanum lycopersicum]
Solyc01g107220.2	94.536	192.873	0.963264	2.34306e-11	XP_004231387.1|3.2e-203|extensin-2-like [Solanum lycopersicum]
Solyc08g007060.2	39.54	80.19	0.961763	6.54477e-10	XP_004244546.1|0.0e+00|protein NRT1/ PTR FAMILY 7.3 [Solanum lycopersicum]
Solyc09g089620.1	21.373	43.603	0.960489	1.84272e-09	XP_004247701.1|2.1e-167|AT-hook motif nuclear-localized protein 20-like [Solanum lycopersicum]
Solyc12g049090.1	11.183	23.013	0.9575	1.0715e-05	XP_019066984.1|1.7e-228|protein PELPK1-like [Solanum lycopersicum]
Solyc04g074960.2	5.193	11.536	0.955475	6.60669e-07	XP_004237967.1|6.3e-147|esterase OVCA2 isoform X1 [Solanum lycopersicum]
Solyc01g095820.2	2.296	5.143	0.954422	0.0334145	XP_010327029.1|2.8e-73|RING-H2 finger protein ATL20-like [Solanum lycopersicum]
Solyc05g005490.2	191.053	381.543	0.94969	1.23251e-39	NP_001296993.1|4.0e-151|carbonic anh isoform 1 [Solanum lycopersicum]
Solyc09g059970.2	2.82	6.256	0.947598	0.0330986	NP_001234834.1|5.1e-55|SUMO protein [Solanum lycopersicum]
Solyc02g014220.2	66.37	134.13	0.945877	2.93183e-09	XP_004231514.1|0.0e+00|endoglucanase 5 [Solanum lycopersicum]
Solyc08g076890.2	113.623	226.783	0.943671	1.1398e-21	XP_025888175.1|5.5e-25|glycine-rich cell wall structural protein 1.8-like [Solanum lycopersicum]
Solyc06g074340.2	4.803	9.75	0.94115	9.98942e-06	XP_004241318.2|6.7e-212|uncharacterized protein LOC101251296 [Solanum lycopersicum]
Solyc01g108710.2	49.256	100.76	0.939554	1.21016e-06	XP_009786559.1|8.3e-08|PREDICTED: uncharacterized protein LOC104234657 [Nicotiana sylvestris]
Solyc12g007250.1	79.946	161.11	0.937844	1.40164e-08	XP_004251619.1|2.1e-175|probable xyloglucan endotransglucosylase/hydrolase protein 26 [Solanum lycopersicum]
Solyc05g055820.2	4.203	9.006	0.934561	0.0180151	XP_010321332.1|7.8e-51|LOW QUALITY PROTEIN: flavin mononucleotide hydrolase 1, chloroplatic [Solanum lycopersicum]
Solyc06g009390.2	6.046	12.086	0.927242	2.14284e-06	XP_004240563.1|2.9e-201|probable protein phosphatase 2C 47 isoform X1 [Solanum lycopersicum]
BGI_novel_G000372	662.243	1348.73	0.927093	0.000601803
Solyc03g114940.2	0.876	1.91	0.92381	0.0461646	XP_004236064.1|5.0e-302|cytochrome P450 78A5-like [Solanum lycopersicum]
Solyc02g092700.2	1.32	2.746	0.922718	0.00964195	XP_010316003.1|1.6e-176|protein CONSERVED IN THE GREEN LINEAGE AND DIATOMS 27, chloroplastic [Solanum lycopersicum]
Solyc07g009290.2	37.956	76.473	0.922312	1.50951e-07	XP_015081859.1|2.7e-41|uncharacterized protein LOC107025603 [Solanum pennellii]
Solyc06g034290.2	3.116	6.313	0.922095	9.84664e-06	XP_004240757.1|7.1e-295|putative glycerol-3-phosphate transporter 1 [Solanum lycopersicum]
Solyc01g109810.2	6.226	12.503	0.919322	6.64831e-05	XP_004230971.1|9.7e-127|uncharacterized protein LOC101244426 [Solanum lycopersicum]
Solyc03g111120.2	1.273	2.48	0.917211	0.023326	XP_004236346.1|8.9e-141|malate synthase, glyoxysomal [Solanum lycopersicum]
Solyc03g043660.2	47.586	92.833	0.91718	2.83946e-22	XP_004234635.1|0.0e+00|protease Do-like 7 [Solanum lycopersicum]
Solyc03g114820.2	12.833	25.596	0.910327	2.55059e-05	XP_004236501.1|1.2e-129|uncharacterized protein LOC101244175 [Solanum lycopersicum]
Solyc01g111340.2	1.15	2.353	0.90799	0.00777434	XP_015070219.1|0.0e+00|endo-1,4-beta-xylanase 5 isoform X1 [Solanum pennellii]
Solyc02g091810.1	0.933	1.99	0.907824	0.0372193	XP_010316043.1|1.2e-179|transcription factor bHLH18-like [Solanum lycopersicum]
Solyc04g080650.2	1.676	3.473	0.9024	0.0166877	XP_004238286.1|2.1e-262|abscisic acid 8'-hydroxylase 2 [Solanum lycopersicum]
Solyc01g005890.1	4.056	8.26	0.902152	0.0109647	XP_019069154.1|1.9e-151|extensin-1-like [Solanum lycopersicum]
Solyc03g123830.2	24.933	48.366	0.901729	2.44012e-10	XP_006342872.1|0.0e+00|PREDICTED: D-3-phosphoglycerate dehydrogenase 3, chloroplastic-like [Solanum tuberosum]
Solyc04g007750.2	120.676	235.083	0.898791	3.76815e-10	XP_004237029.1|7.6e-82|kirola-like [Solanum lycopersicum]
Solyc09g011570.2	39.156	75.7	0.894678	1.66065e-14	XP_010325821.1|8.4e-119|probable glutathione S-transferase [Solanum lycopersicum]
Solyc08g082630.2	2.59	5.14	0.894552	0.000564128	XP_010325288.1|0.0e+00|auxin response factor 9 isoform X1 [Solanum lycopersicum]
Solyc08g007430.1	524.703	1009.13	0.894012	3.19344e-15	XP_004244572.1|0.0e+00|protein NRT1/ PTR FAMILY 6.3 [Solanum lycopersicum]
Solyc03g112200.1	21.193	41.273	0.893268	3.07594e-08	OIT04843.1|1.2e-20|hypothetical protein A4A49_06396 [Nicotiana attenuata]
Solyc01g109860.2	26.616	51.72	0.892383	1.39748e-07	XP_004230875.1|0.0e+00|phosphatidylinositol/phosphatidylcholine transfer protein SFH12-like [Solanum lycopersicum]
Solyc00g201160.2	2.12	4.05	0.888366	0.00789711	PHU20621.1|1.8e-136|G-type lectin S-receptor-like serine/threonine-protein kinase [Capsicum chinense]
Solyc01g105960.2	1.31	2.676	0.887417	0.0038265	XP_004231365.1|5.0e-201|terpene synthase 10 [Solanum lycopersicum]
Solyc09g011490.2	4.666	9.426	0.885241	0.0118538	XP_004246388.1|4.9e-124|probable glutathione S-transferase [Solanum lycopersicum]
Solyc12g100100.1	57.02	108.62	0.882644	8.22297e-08	XP_019066846.1|2.3e-255|adhesive plaque matrix protein-like [Solanum lycopersicum]
BGI_novel_G000333	63.92	123.126	0.881665	5.63312e-10
Solyc06g072100.1	0.706	1.45	0.876382	0.0361925	XP_010322516.1|0.0e+00|ABC transporter G family member 11-like [Solanum lycopersicum]
Solyc01g104430.1	2.42	4.743	0.875634	0.00564836	XP_025883587.1|2.6e-57|uncharacterized protein LOC101262462 [Solanum lycopersicum]
Solyc05g010230.1	5.333	10.336	0.875544	0.00434181	XP_025886755.1|1.7e-72|nucleolar and coiled-body phosphoprotein 1-like [Solanum lycopersicum]
Solyc09g014280.1	267.953	522.016	0.871749	0.000968534	XP_004246337.2|1.4e-269|uncharacterized acetyltransferase At3g50280 [Solanum lycopersicum]
Solyc01g006660.1	10.976	20.86	0.87164	1.12723e-09	XP_004228919.2|0.0e+00|CO(2)-response secreted protease-like [Solanum lycopersicum]
Solyc02g081990.2	85.813	163.726	0.870484	4.32538e-09	XP_004233764.1|0.0e+00|probable pectinesterase/pectinesterase inhibitor 46 [Solanum lycopersicum]
Solyc02g081570.2	2.83	5.446	0.870312	7.61616e-05	XP_015064451.1|0.0e+00|probable metal-nicotianamine transporter YSL7 [Solanum pennellii]
Solyc02g030220.1	46.896	89.71	0.86912	1.37028e-08	XP_019067693.1|7.3e-212|extensin-2-like [Solanum lycopersicum]
Solyc09g018180.1	1.3	2.633	0.867399	0.0321217	XP_015087490.1|5.1e-20|uncharacterized protein LOC107030746 [Solanum pennellii]
BGI_novel_G000102	7.8	14.816	0.866672	2.19458e-08
Solyc02g032550.1	2.913	5.64	0.865589	0.00127755	XP_025884983.1|1.5e-213|apyrase-like [Solanum lycopersicum]
Solyc02g079170.2	6.06	11.543	0.864653	2.07844e-06	XP_015067245.1|0.0e+00|external alternative NAD(P)H-ubiquinone oxidoreductase B2, mitochondrial [Solanum pennellii]
Solyc12g096480.1	6.813	13.93	0.86452	0.0350924	XP_004253054.1|4.6e-81|protein GLUTAMINE DUMPER 2 [Solanum lycopersicum]
Solyc10g084950.1	7.946	15.056	0.86385	2.17693e-08	XP_010312293.1|0.0e+00|protein NRT1/ PTR FAMILY 5.6-like [Solanum lycopersicum]
Solyc06g072240.1	8.94	18.616	0.860584	0.0498558	PHT46786.1|3.4e-51|Histone H4 [Capsicum baccatum]
Solyc02g080910.2	16.326	35.423	0.860461	1.2758e-05	PHT90798.1|0.0e+00|putative pectate lyase 16 [Capsicum annuum]
Solyc09g010430.1	15.436	31.83	0.860341	0.0260355	OIT01226.1|1.1e-26|hypothetical protein A4A49_07414 [Nicotiana attenuata]
Solyc01g079910.1	1.373	2.663	0.858308	0.0155735	NP_001305570.1|7.5e-48|basic 7S globulin-like [Solanum tuberosum]
Solyc06g062430.2	5.803	10.4	0.855776	0.000149304	XP_015078660.1|1.1e-180|inositol oxygenase 1-like [Solanum pennellii]
Solyc11g072890.1	29.68	56.82	0.852851	1.27905e-06	XP_004251294.1|3.4e-84|uncharacterized protein LOC101257533 [Solanum lycopersicum]
Solyc07g006160.2	14.866	27.76	0.852632	2.4527e-13	XP_010323216.1|1.8e-290|AFG1-like ATPase isoform X1 [Solanum lycopersicum]
Solyc06g048820.1	58.163	112.17	0.851307	2.87033e-07	XP_025887236.1|4.8e-56|wound-induced protein 1 [Solanum lycopersicum]
Solyc04g049800.2	1.183	2.38	0.850036	0.0474341	XP_004237667.2|3.1e-234|ethylene-responsive transcription factor RAP2-7-like [Solanum lycopersicum]
Solyc01g098930.2	4.603	8.873	0.84922	0.00263571	XP_004230189.1|1.2e-126|cyclin-P3-1 isoform X1 [Solanum lycopersicum]
Solyc12g043150.1	3.026	5.82	0.847758	0.0024793	XP_004252492.1|9.4e-296|uncharacterized protein LOC101252964 [Solanum lycopersicum]
Solyc09g010970.2	9.793	18.293	0.847294	2.08323e-06	XP_004246439.1|2.0e-162|beta carbonic anhydrase 5, chloroplastic isoform X3 [Solanum lycopersicum]
Solyc05g007830.2	18.313	34.37	0.844357	1.352e-07	XP_004238818.1|1.4e-151|expansin-A1 [Solanum lycopersicum]
Solyc10g007960.1	6.313	12.143	0.844314	0.006087	NP_001265949.1|2.4e-288|allene oxide synthase 3 [Solanum lycopersicum]
Solyc03g093800.1	34.323	65.32	0.843271	1.61935e-06	XP_027367300.1|5.6e-41|glycine-rich cell wall structural protein 2-like [Abrus precatorius]
Solyc03g083590.2	0.966	1.846	0.843025	0.00220342	XP_004235102.1|0.0e+00|probable serine/threonine protein kinase IRE [Solanum lycopersicum]
Solyc07g043710.2	13.866	25.943	0.842706	1.37028e-08	XP_004243889.2|4.8e-256|acylsugar acyltransferase 3-like [Solanum lycopersicum]
Solyc07g049280.2	1.566	3.013	0.842204	0.00743632	XP_015080987.1|0.0e+00|pyrophosphate--fructose 6-phosphate 1-phosphotransferase subunit beta-like [Solanum pennellii]
Solyc02g092820.2	3.946	7.423	0.841923	4.66087e-05	XP_004231891.1|0.0e+00|probable indole-3-acetic acid-amido synthetase GH3.1 [Solanum lycopersicum]
Solyc08g075010.2	3.28	5.67	0.841538	1.02471e-05	XP_004246039.1|8.2e-227|carbon catabolite repressor protein 4 homolog 4 isoform X1 [Solanum lycopersicum]
Solyc01g006720.2	1.38	2.653	0.840205	0.00950574	XP_004228604.1|0.0e+00|ABC transporter G family member 22-like isoform X1 [Solanum lycopersicum]
Solyc04g058100.2	2127.17	4216.76	0.839052	0.021128	NP_001234054.1|6.7e-41|metallothionein-like protein type 2 [Solanum lycopersicum]
Solyc06g051040.2	22.186	41.25	0.837831	1.49039e-07	XP_004241113.1|0.0e+00|probable inactive serine/threonine-protein kinase bub1 [Solanum lycopersicum]
Solyc07g006570.2	3.103	5.996	0.835441	0.0100785	XP_004242665.1|9.1e-143|ribonuclease 3-like [Solanum lycopersicum]
Solyc01g107390.2	19.323	35.756	0.835106	3.72428e-09	NP_001308616.1|0.0e+00|indole-3-acetic acid-amido synthetase GH3.2 [Solanum lycopersicum]
Solyc12g049160.1	16.023	30.05	0.835059	2.06358e-05	XP_019066891.1|1.2e-223|protein PELPK1-like [Solanum lycopersicum]
Solyc12g049550.1	13.74	25.56	0.83404	1.94897e-08	XP_004252404.1|1.1e-216|GDSL esterase/lipase 5 [Solanum lycopersicum]
Solyc04g071070.2	463.376	846.386	0.832282	4.37452e-20	XP_004237771.2|6.1e-165|LOW QUALITY PROTEIN: extensin-3 [Solanum lycopersicum]
Solyc05g010450.1	4.74	9.016	0.83184	0.00262488	XP_004238999.1|8.7e-169|uncharacterized protein LOC101250888 [Solanum lycopersicum]
Solyc04g077050.2	14.916	27.516	0.829929	4.64775e-10	XP_019261028.1|7.4e-266|PREDICTED: amino acid permease 6-like [Nicotiana attenuata]
Solyc07g042520.2	96.523	177.02	0.829441	4.25167e-14	XP_004243680.1|0.0e+00|sucrose synthase-like [Solanum lycopersicum]
Solyc02g038690.1	12.673	24.49	0.829403	0.00550713	XP_004231635.1|7.4e-67|histone H2B [Solanum lycopersicum]
Solyc07g006230.1	365.33	682.596	0.828372	1.20382e-24	XP_010323224.1|8.0e-66|glycine-rich cell wall structural protein 2 [Solanum lycopersicum]
BGI_novel_G000516	1.45	2.826	0.827863	0.0325538
Solyc02g083670.2	17.793	33.766	0.827489	0.00213606	XP_025885285.1|2.0e-66|histidine kinase 1 isoform X1 [Solanum lycopersicum]
Solyc09g098620.1	21.02	38.573	0.826298	1.66195e-11	XP_004246575.1|2.4e-302|cytochrome P450 76A1-like [Solanum lycopersicum]
Solyc03g005820.2	26.233	48.223	0.825212	7.86438e-12	XP_004234056.1|7.1e-237|purine permease 21 isoform X2 [Solanum lycopersicum]
Solyc07g061980.1	1.3	2.513	0.823957	0.0304749	XP_015080935.1|3.1e-299|cytochrome P450 CYP72A219-like [Solanum pennellii]
Solyc12g098540.1	14.233	26.283	0.822979	4.37016e-06	XP_004252980.1|4.5e-265|apyrase [Solanum lycopersicum]
Solyc01g108120.2	4.216	7.92	0.822841	0.00102494	XP_004230781.1|5.7e-169|B3 domain-containing protein At5g42700 [Solanum lycopersicum]
Solyc09g075410.2	158.633	303.09	0.822706	0.00734735	XP_004247533.1|2.9e-115|uncharacterized protein LOC101257107 [Solanum lycopersicum]
Solyc06g060530.1	2.17	4.126	0.82193	0.00879739	XP_004242013.1|1.2e-279|protein DETOXIFICATION 56-like [Solanum lycopersicum]
Solyc01g068630.2	14.966	27.593	0.821088	6.12586e-08	NP_001316510.1|4.8e-142|haloacid dehalogenase-like hydrolase superfamily protein [Solanum lycopersicum]
Solyc10g078220.1	1.46	2.84	0.820895	0.0439282	XP_006364800.1|9.4e-264|PREDICTED: cytochrome P450 98A3-like isoform X4 [Solanum tuberosum]
Solyc01g094890.2	13.516	24.76	0.819017	5.96157e-08	XP_004229896.2|0.0e+00|ferric reduction oxidase 2 [Solanum lycopersicum]
Solyc03g097840.2	24.66	45.15	0.816241	1.6208e-10	XP_015071128.1|7.1e-203|mitochondrial phosphate carrier protein 3, mitochondrial [Solanum pennellii]
Solyc10g012420.2	16.593	30.466	0.815693	9.07147e-10	XP_009797229.1|3.5e-81|PREDICTED: uncharacterized protein LOC104243688 isoform X2 [Nicotiana sylvestris]
Solyc03g121540.2	20.156	38.81	0.815373	0.0391862	XP_006342989.1|0.0e+00|PREDICTED: beta-galactosidase [Solanum tuberosum]
Solyc02g091540.2	14.873	27.756	0.815028	0.000635231	XP_004231982.3|1.8e-64|uncharacterized protein At4g22758-like [Solanum lycopersicum]
Solyc07g008420.2	25.31	46.87	0.811186	1.66668e-05	XP_004242793.1|4.3e-68|blue copper protein-like [Solanum lycopersicum]
Solyc09g011190.1	24.706	47.163	0.808376	0.00255166	XP_010325836.1|3.6e-53|uncharacterized protein LOC104649061 [Solanum lycopersicum]
Solyc12g006000.1	1.886	3.52	0.806924	0.00448106	XP_004251531.1|0.0e+00|clathrin coat assembly protein AP180-like [Solanum lycopersicum]
Solyc05g051650.1	1.616	3.12	0.806779	0.0475186	XP_004240243.2|4.1e-219|QWRF motif-containing protein 7 [Solanum lycopersicum]
BGI_novel_G000323	1.846	3.42	0.805233	0.00763932
Solyc12g014310.1	6.956	12.986	0.803924	0.00335096	XP_004251898.1|8.5e-135|pathogen-related protein-like isoform X2 [Solanum lycopersicum]
Solyc03g113350.2	73.693	132.78	0.803371	2.77398e-19	XP_010318962.1|0.0e+00|zinc finger protein BRUTUS-like At1g74770 isoform X1 [Solanum lycopersicum]
Solyc02g090490.2	3.503	6.503	0.803254	0.00515834	XP_004232051.1|6.7e-233|patatin-like protein 3 [Solanum lycopersicum]
Solyc07g053830.2	25.353	45.836	0.803077	9.80188e-12	XP_004243366.1|1.1e-220|ADP,ATP carrier protein 1, mitochondrial [Solanum lycopersicum]
Solyc02g080040.2	1.673	3.373	0.803016	0.00136183	XP_025885209.1|6.3e-250|cysteine-rich receptor-like protein kinase 10 [Solanum lycopersicum]
Solyc06g051680.1	11.59	22.14	0.802352	0.0100982	PHT78422.1|2.4e-51|Protein EARLY FLOWERING 4 [Capsicum annuum]
Solyc01g107780.2	21.11	38.313	0.801551	1.23558e-08	XP_004230753.1|1.3e-284|scopoletin glucosyltransferase-like [Solanum lycopersicum]
Solyc07g043070.2	7.73	14.34	0.800044	0.0021288	XP_004243655.1|5.3e-97|uncharacterized protein LOC101259763 [Solanum lycopersicum]
Solyc07g052730.2	0.643	1.193	0.79955	0.0279798	XP_006360565.1|0.0e+00|PREDICTED: formin-like protein 3 [Solanum tuberosum]
Solyc09g007750.2	8.173	14.82	0.798418	1.12226e-09	XP_004246660.1|5.9e-239|serine/threonine-protein kinase-like protein CCR1 [Solanum lycopersicum]
Solyc09g097890.2	3.566	6.683	0.797408	0.0287494	XP_004248021.1|3.3e-232|cytochrome b561 and DOMON domain-containing protein At3g25290 [Solanum lycopersicum]
Solyc03g116340.2	22.83	41.143	0.79371	2.58136e-10	XP_004236021.1|2.0e-132|transcription factor bHLH47 [Solanum lycopersicum]
Solyc06g009610.1	1.43	2.366	0.789058	0.00157171	XP_010321870.2|0.0e+00|DELLA protein RGL1-like [Solanum lycopersicum]
Solyc11g007730.1	15.806	28.786	0.787636	0.000678273	XP_004250013.1|1.1e-196|bark storage protein A [Solanum lycopersicum]
Solyc09g091240.2	7.306	13.13	0.786506	2.41386e-06	XP_004247813.1|4.5e-200|protein PAM71-homolog, chloroplastic [Solanum lycopersicum]
Solyc12g040790.1	47.903	85.596	0.786403	4.76437e-11	XP_015061238.1|1.6e-295|phosphomethylethanolamine N-methyltransferase-like isoform X2 [Solanum pennellii]
Solyc02g082060.1	5.046	9.48	0.786123	0.0304749	XP_004232611.1|8.3e-121|deSI-like protein At4g17486 [Solanum lycopersicum]
Solyc00g272810.1	5.34	9.943	0.782424	0.0203547	XP_004253515.1|4.2e-137|probable acetyltransferase NATA1-like [Solanum lycopersicum]
Solyc02g079870.2	90.02	162.41	0.781521	1.03812e-07	XP_004232759.1|1.5e-63|uncharacterized protein LOC101267080 [Solanum lycopersicum]
Solyc02g014300.1	93.303	171.433	0.781452	0.00755468	XP_004231483.1|0.0e+00|probable pectinesterase/pectinesterase inhibitor 46 [Solanum lycopersicum]
Solyc10g018200.1	34.493	61.876	0.779537	1.52536e-09	XP_004248616.1|2.7e-122|uncharacterized protein LOC101252333 [Solanum lycopersicum]
Solyc11g069970.1	5.66	10.393	0.779279	0.00722056	XP_004251411.1|2.0e-148|NDR1/HIN1-like protein 6 [Solanum lycopersicum]
Solyc07g006870.2	2.343	4.36	0.774653	0.0435633	XP_004242687.1|2.2e-166|probable xyloglucan endotransglucosylase/hydrolase protein 25 [Solanum lycopersicum]
Solyc07g007760.2	26.946	48.85	0.7746	0.000985468	NP_001333453.1|1.2e-39|defensin-like protein precursor [Solanum lycopersicum]
Solyc05g055970.2	30.526	54.466	0.774266	1.36007e-08	XP_019069429.1|4.0e-77|protein ACCELERATED CELL DEATH 6-like [Solanum lycopersicum]
Solyc01g091300.2	5.05	9.533	0.773127	4.74487e-05	XP_019071378.1|3.5e-296|protein transport Sec1a isoform X1 [Solanum lycopersicum]
Solyc03g006250.2	80.833	143.42	0.772992	3.16358e-09	XP_004234096.1|3.1e-222|GDSL esterase/lipase At1g28590 [Solanum lycopersicum]
Solyc02g093610.2	32.02	56.853	0.769724	1.36551e-10	XP_004231825.1|1.4e-82|BAG family molecular chaperone regulator 3 [Solanum lycopersicum]
Solyc06g068990.2	1.416	2.586	0.765675	0.0226503	XP_010322620.1|0.0e+00|mitogen-activated protein kinase 9 isoform X1 [Solanum lycopersicum]
Solyc07g006710.1	59.733	107.196	0.765611	1.9312e-05	XP_004242676.1|4.8e-109|pathogenesis-related protein PR-1-like [Solanum lycopersicum]
Solyc12g006640.1	17.416	30.563	0.763434	4.53573e-05	XP_004251570.1|2.3e-94|uncharacterized protein LOC101264403 [Solanum lycopersicum]
Solyc10g081910.1	19.1	33.436	0.763218	6.85849e-16	XP_004249405.1|0.0e+00|receptor-like kinase TMK3 [Solanum lycopersicum]
Solyc03g083910.2	6.416	11.326	0.762222	2.25477e-06	NP_001234843.2|0.0e+00|acid beta-fructofuranosidase precursor [Solanum lycopersicum]
Solyc04g077310.2	1.49	2.686	0.76207	0.0212704	XP_025886297.1|1.5e-256|uncharacterized protein LOC104647168 [Solanum lycopersicum]
Solyc02g093330.2	3.733	6.21	0.761444	6.76454e-07	XP_004233600.3|0.0e+00|nuclear pore complex protein NUP98B-like isoform X2 [Solanum lycopersicum]
BGI_novel_G000338	2.243	4.106	0.761169	0.0305827
Solyc04g025750.2	55.34	101.536	0.76065	0.0373189	XP_019069025.2|2.4e-207|WAT1-related protein At1g70260-like [Solanum lycopersicum]
Solyc10g085010.1	32.113	57.6	0.760614	0.000266492	XP_004249554.1|4.9e-101|uncharacterized protein LOC101267755 [Solanum lycopersicum]
Solyc05g010420.1	570.113	999.426	0.757605	3.03561e-16	NP_001234699.1|3.0e-208|S-adenosylmethionine decarboxylase [Solanum lycopersicum]
Solyc06g065010.2	22.656	39.88	0.756613	6.47429e-07	XP_004241846.1|2.8e-213|GDSL esterase/lipase 2 [Solanum lycopersicum]
Solyc09g010940.2	41.963	73.466	0.755571	1.55312e-09	XP_004246419.1|3.5e-155|uncharacterized protein LOC101251913 [Solanum lycopersicum]
Solyc06g060900.1	18.29	33.323	0.754409	0.0083594	XP_019263513.1|6.0e-34|PREDICTED: classical arabinogalactan protein 9-like [Nicotiana attenuata]
Solyc04g055130.1	12.166	22.473	0.7542	0.0260355	XP_015073134.1|7.1e-67|uncharacterized protein LOC107017409 [Solanum pennellii]
Solyc01g059880.2	20.69	36.106	0.754056	9.78705e-12	XP_004229010.1|0.0e+00|ATP-citrate synthase beta chain protein 2-like [Solanum lycopersicum]
Solyc02g082240.1	10.636	19.366	0.753435	0.0120962	PHU26627.1|9.2e-55|hypothetical protein BC332_04959 [Capsicum chinense]
Solyc02g089210.2	3.04	5.556	0.752028	0.0423918	XP_010316206.1|8.3e-140|truncated transcription factor CAULIFLOWER A [Solanum lycopersicum]
Solyc11g066640.1	5.783	10.246	0.751445	0.000843907	XP_004250998.1|3.5e-259|agmatine coumaroyltransferase-2-like [Solanum lycopersicum]
Solyc07g052670.2	412.486	715.906	0.750687	3.34966e-20	XP_010323806.1|5.4e-133|transcription factor ILR3 isoform X1 [Solanum lycopersicum]
Solyc06g071730.2	3.296	6.073	0.750587	0.028374	XP_015078838.1|4.2e-68|U-box domain-containing protein 35-like [Solanum pennellii]
Solyc12g099160.1	20.643	35.976	0.748325	1.45679e-09	NP_001334360.1|1.6e-289|serine carboxypeptidase family protein precursor [Solanum lycopersicum]
Solyc03g113720.2	5.673	10.116	0.747852	0.00489523	XP_004236156.1|2.5e-103|two-component response regulator ARR15 [Solanum lycopersicum]
Solyc10g007420.2	2.566	4.433	0.747689	0.0174786	XP_004248495.1|2.5e-247|TPR repeat-containing thioredoxin TTL4-like [Solanum lycopersicum]
Solyc10g005810.2	3.353	5.896	0.745846	0.00595436	XP_004248322.3|6.0e-151|farnesyl pyrophosphate synthase 1-like isoform X1 [Solanum lycopersicum]
Solyc01g010180.2	3.08	5.533	0.745328	0.0220168	XP_004228419.1|4.6e-92|uncharacterized protein LOC101260464 [Solanum lycopersicum]
Solyc01g099970.2	6.476	11.38	0.742661	2.44635e-10	XP_010313225.1|0.0e+00|F-box/LRR-repeat protein 3 [Solanum lycopersicum]
Solyc11g007930.1	44.246	78.256	0.741504	1.34048e-05	XP_015058728.1|2.1e-64|histone H2B-like [Solanum pennellii]
Solyc01g107190.2	89.026	154.22	0.741316	5.60219e-14	XP_004230706.1|6.1e-120|LOB domain-containing protein 37 [Solanum lycopersicum]
Solyc12g088000.1	39.033	67.546	0.740275	3.99626e-11	PHT32657.1|3.0e-191|Tyrosine aminotransferase [Capsicum baccatum]
Solyc04g080170.2	5.523	9.56	0.739494	8.54608e-08	XP_004238243.1|0.0e+00|probable serine/threonine protein kinase IRE4 isoform X1 [Solanum lycopersicum]
Solyc02g070280.2	2.973	5.2	0.739342	0.00145165	XP_006352988.1|0.0e+00|PREDICTED: cationic amino acid transporter 1-like [Solanum tuberosum]
Solyc04g007800.2	4.486	8.056	0.73552	0.0301486	XP_004237015.1|3.2e-93|protein C2-DOMAIN ABA-RELATED 7-like [Solanum lycopersicum]
Solyc02g083660.1	68.16	118.403	0.73534	4.29844e-08	XP_010316430.1|4.4e-93|E3 ubiquitin-protein ligase RHA2B-like [Solanum lycopersicum]
Solyc01g096280.1	8.286	14.38	0.735023	7.87865e-06	XP_004230013.1|0.0e+00|cytochrome P450 78A3 [Solanum lycopersicum]
Solyc11g012670.1	2.163	3.813	0.734704	0.00755258	XP_004250291.1|0.0e+00|pentatricopeptide repeat-containing protein At4g16390, chloroplastic [Solanum lycopersicum]
Solyc05g009150.2	8.96	15.373	0.73391	3.52981e-12	XP_004238914.1|0.0e+00|zinc finger protein BRUTUS-like [Solanum lycopersicum]
Solyc02g079480.1	4.666	8.156	0.733536	0.00268262	XP_004233809.1|0.0e+00|berberine bridge enzyme-like 22 [Solanum lycopersicum]
Solyc03g025490.2	13.356	23.19	0.733202	9.88238e-06	XP_004234410.1|1.0e-184|gibberellin 20-oxidase-like protein [Solanum lycopersicum]
Solyc03g007380.1	5.083	8.92	0.733131	0.00286499	XP_004234275.1|3.8e-211|probable WRKY transcription factor 41 [Solanum lycopersicum]
Solyc08g082680.2	8.006	13.966	0.732771	0.00059462	XP_004245495.1|1.6e-130|probable E3 ubiquitin-protein ligase RHA4A [Solanum lycopersicum]
Solyc06g083130.2	16.57	28.986	0.731331	0.000379301	XP_004242430.1|3.3e-61|dCTP pyrophosphatase 1 [Solanum lycopersicum]
Solyc04g011750.2	38.716	67.473	0.730837	4.21006e-05	XP_004236724.1|1.9e-53|histone H3.v1 [Solanum lycopersicum]
Solyc08g007240.2	7.046	12.316	0.730627	0.000431804	XP_004244559.1|5.7e-211|nudix hydrolase 8 isoform X1 [Solanum lycopersicum]
Solyc04g074180.2	2.813	4.963	0.726729	0.0034703	NP_001234667.1|0.0e+00|cryptochrome 1 [Solanum lycopersicum]
Solyc12g040860.1	5.25	9.253	0.725914	0.0212704	XP_004252276.1|9.6e-268|glucan endo-1,3-beta-glucosidase 12 [Solanum lycopersicum]
Solyc08g074680.2	36.343	65.513	0.725365	2.05985e-15	XP_004246029.3|0.0e+00|LOW QUALITY PROTEIN: polyphenol oxidase A, chloroplastic [Solanum lycopersicum]
Solyc11g071210.1	7.813	13.606	0.724575	0.00152594
Solyc03g078650.2	8.943	15.423	0.723162	0.000101546	XP_004235056.1|4.7e-244|uncharacterized protein LOC101260516 [Solanum lycopersicum]
Solyc11g008200.1	13.763	23.553	0.722485	1.22276e-06	XP_004250040.1|0.0e+00|protein NUCLEAR FUSION DEFECTIVE 4-like [Solanum lycopersicum]
Solyc08g068140.2	9.576	17.213	0.721935	0.000780349	XP_025888125.1|0.0e+00|uncharacterized protein LOC101256204 [Solanum lycopersicum]
Solyc12g007240.1	12.646	22.443	0.721529	0.0124572	XP_004251618.1|2.2e-77|protein SPEAR1-like [Solanum lycopersicum]
Solyc01g112160.2	6.613	11.51	0.720862	0.00402328	XP_004231092.1|5.0e-127|metal-independent phosphoserine phosphatase [Solanum lycopersicum]
Solyc01g103360.2	10.086	17.39	0.717591	0.000246559	XP_004230438.1|4.0e-157|glucuronoxylan 4-O-methyltransferase 1 [Solanum lycopersicum]
Solyc05g052500.2	14.2	24.023	0.717535	6.80974e-09	XP_004239948.1|0.0e+00|probable methyltransferase PMT23 [Solanum lycopersicum]
Solyc09g011250.2	3.36	5.956	0.717284	0.0456541	XP_004246447.1|7.7e-139|uncharacterized protein At2g39795, mitochondrial-like [Solanum lycopersicum]
Solyc11g066270.1	51	87.166	0.716923	1.80554e-09	NP_001233819.2|2.4e-179|xyloglucan endotransglucosylase-hydrolase XTH6 precursor [Solanum lycopersicum]
Solyc02g067560.1	7.443	12.733	0.71652	5.45978e-05	XP_004233342.1|0.0e+00|inactive LRR receptor-like serine/threonine-protein kinase BIR2 [Solanum lycopersicum]
Solyc01g104190.2	7.016	12.223	0.716354	0.00508906	XP_010314796.1|4.1e-77|uncharacterized protein LOC101255737 [Solanum lycopersicum]
Solyc12g042460.1	6.683	11.446	0.715637	8.59122e-05	NP_001333776.1|0.0e+00|4-coumarate--CoA ligase-like [Solanum lycopersicum]
Solyc01g080600.2	48.82	83.776	0.714961	3.56452e-06	VDD10577.1|4.1e-70|unnamed protein product, partial [Brassica oleracea]
Solyc01g098320.2	8.43	14.466	0.714037	0.000285379	XP_004230150.1|1.6e-124|DNA-directed RNA polymerase V subunit 5A-like [Solanum lycopersicum]
Solyc10g085920.1	2.913	5.096	0.713653	0.000891036	XP_004249606.1|6.3e-242|UDP-glucuronic acid decarboxylase 1-like [Solanum lycopersicum]
Solyc01g079920.2	19.37	32.96	0.713569	2.63409e-08	XP_004229562.1|2.0e-246|basic 7S globulin-like [Solanum lycopersicum]
Solyc03g113340.2	3.576	6.243	0.713372	0.0249301	XP_004236183.1|2.3e-311|protein NUCLEAR FUSION DEFECTIVE 4-like [Solanum lycopersicum]
Solyc08g078460.2	27.133	46.253	0.712717	3.9691e-09	XP_004245781.1|3.1e-216|uncharacterized protein LOC101260461 [Solanum lycopersicum]
Solyc12g098100.1	3.596	6.136	0.712456	0.000155254	XP_019066855.1|0.0e+00|probable leucine-rich repeat receptor-like protein kinase At5g63930 [Solanum lycopersicum]
Solyc01g005880.1	62.46	106.94	0.71244	8.21727e-06	XP_015068160.1|1.7e-176|extensin-3-like [Solanum pennellii]
Solyc03g093450.2	9.433	16.006	0.712189	3.2328e-08	XP_010318173.1|0.0e+00|U-box domain-containing protein 35-like [Solanum lycopersicum]
Solyc12g045020.1	11.106	18.956	0.710873	3.35344e-05	XP_004252382.1|8.2e-289|cytochrome P450 CYP736A12 [Solanum lycopersicum]
Solyc05g053210.2	20.573	34.79	0.709713	9.94786e-09	NP_001296828.1|9.9e-268|CBL-interacting serine/threonine-protein kinase 1 [Solanum lycopersicum]
Solyc09g011390.2	6.54	10.963	0.708995	2.30965e-05	XP_004246394.1|7.2e-273|protein NRT1/ PTR FAMILY 5.6-like [Solanum lycopersicum]
Solyc07g008600.1	3.63	6.173	0.705788	0.000216479	XP_004242808.2|0.0e+00|receptor-like protein EIX1 [Solanum lycopersicum]
Solyc02g036350.2	3.87	6.646	0.704873	0.00555718	NP_001234638.1|8.7e-184|1-aminocyclopropane-1-carboxylate oxidase [Solanum lycopersicum]
Solyc04g079640.2	21.433	36.243	0.702312	9.20273e-07	XP_004238199.1|0.0e+00|cytochrome P450 CYP82D47 [Solanum lycopersicum]
Solyc01g005460.2	9.97	17.21	0.702261	0.00578214	XP_004228726.1|2.4e-68|dynein light chain 1, cytoplasmic [Solanum lycopersicum]
Solyc05g050280.2	15.11	25.526	0.701987	5.64458e-11	XP_004240084.1|1.6e-266|jasmonic acid-amido synthetase JAR1 [Solanum lycopersicum]
Solyc03g122000.2	1.756	3	0.69898	0.0105785	ANQ38917.1|5.8e-54|cytochrome b6/f complex subunit IV (plastid) [Kuruna debilis]
Solyc03g005020.2	5.64	9.546	0.696622	0.000789884	XP_004234001.1|2.4e-238|triacylglycerol lipase 2 [Solanum lycopersicum]
Solyc02g090930.2	10.326	17.456	0.696158	3.11763e-05	XP_004232026.1|1.7e-290|uncharacterized protein LOC101267367 [Solanum lycopersicum]
Solyc07g008280.2	33.733	57.09	0.695183	1.47351e-06	XP_004242784.1|2.3e-74|uncharacterized protein LOC101249561 [Solanum lycopersicum]
Solyc04g005080.2	15.27	25.626	0.694773	1.15698e-06	XP_004237076.1|9.6e-227|pyruvate dehydrogenase E1 component subunit alpha, mitochondrial [Solanum lycopersicum]
Solyc12g007270.1	13.04	22.33	0.694601	0.00474039	XP_004252059.2|1.7e-177|probable xyloglucan endotransglucosylase/hydrolase protein 26 [Solanum lycopersicum]
Solyc04g078110.1	47.273	78.856	0.694122	1.85811e-14	XP_009615143.1|0.0e+00|PREDICTED: subtilisin-like protease SBT1.7 [Nicotiana tomentosiformis]
Solyc07g066480.2	7.666	12.706	0.69019	5.13175e-07	NP_001234144.1|0.0e+00|molybdenum cofactor sulfurase [Solanum lycopersicum]
Solyc11g066400.1	17.156	28.93	0.6897	7.32165e-05	XP_004251369.1|1.9e-168|zinc finger protein ZAT5 [Solanum lycopersicum]
Solyc06g076330.2	17.513	29.186	0.688013	7.31418e-08	XP_004241217.1|0.0e+00|laccase-2-like [Solanum lycopersicum]
Solyc02g083310.2	36.263	60.336	0.687307	2.75543e-07	XP_004232531.1|8.0e-183|bifunctional nuclease 2 [Solanum lycopersicum]
Solyc10g076830.1	7.08	11.84	0.685435	8.1597e-05	XP_019254775.1|0.0e+00|PREDICTED: laccase-4-like [Nicotiana attenuata]
Solyc02g091080.1	1.573	3.426	0.685166	0.00293134	XP_015169112.1|8.0e-239|PREDICTED: protein DETOXIFICATION 2-like isoform X2 [Solanum tuberosum]
Solyc03g111690.2	43.93	73.013	0.685148	4.36222e-08	XP_020218108.1|1.2e-207|probable pectate lyase 18 [Cajanus cajan]
Solyc07g007930.2	31.45	52.27	0.682816	2.07758e-06	XP_004242758.2|0.0e+00|probable galactinol--sucrose galactosyltransferase 6 isoform X1 [Solanum lycopersicum]
Solyc01g097680.2	236.38	406.59	0.682811	0.0363004	XP_019066650.1|2.5e-193|extensin-3-like [Solanum lycopersicum]
Solyc05g052340.2	2.343	3.993	0.682661	0.030688	XP_015075726.1|0.0e+00|laccase-12-like [Solanum pennellii]
BGI_novel_G000301	1.516	2.533	0.682604	0.00236825
Solyc09g008190.2	18.596	31.206	0.679924	0.000968551	XP_019071337.1|1.4e-102|uncharacterized protein LOC101262949 [Solanum lycopersicum]
Solyc06g071130.2	17.176	28.363	0.679917	2.52766e-13	XP_004242165.1|0.0e+00|zinc finger protein BRUTUS-like At1g74770 isoform X1 [Solanum lycopersicum]
Solyc10g008330.2	9.423	15.986	0.679636	0.00891073	XP_004248168.1|5.8e-80|uncharacterized protein LOC101264072 [Solanum lycopersicum]
Solyc10g074540.1	6.466	11.033	0.67933	0.0400522	XP_004249003.1|2.0e-204|protein EXORDIUM-like 5 [Solanum lycopersicum]
Solyc01g108340.2	16.31	27.073	0.679234	6.88988e-07	XP_015067254.1|2.6e-211|peptidyl-prolyl cis-trans isomerase CYP40 [Solanum pennellii]
Solyc05g050540.2	5.033	8.446	0.678469	0.00165958	XP_004240073.1|0.0e+00|laccase-6 isoform X2 [Solanum lycopersicum]
Solyc04g071560.2	10.87	18.226	0.678079	0.000806658	XP_004237802.1|3.9e-92|thioredoxin Y1, chloroplastic [Solanum lycopersicum]
Solyc05g014230.2	10.09	16.82	0.67624	0.000147073	XP_004239169.1|1.8e-148|E3 ubiquitin-protein ligase AIRP2 [Solanum lycopersicum]
Solyc01g091700.2	19.443	32.39	0.67362	0.000302866	XP_004229840.1|8.6e-171|F-box protein PP2-A13 [Solanum lycopersicum]
Solyc00g170200.1	24.066	41.043	0.672215	0.00656181	XP_004253481.2|6.4e-68|strigolactone esterase D14 [Solanum lycopersicum]
Solyc09g082710.2	46.746	77.84	0.672155	5.53774e-06	XP_004247603.1|6.2e-72|probable histone H2AXb [Solanum lycopersicum]
Solyc12g036390.1	12.686	20.99	0.671569	7.2438e-06	XP_004252230.1|3.4e-265|protein SAR DEFICIENT 1-like [Solanum lycopersicum]
Solyc01g005850.1	239.71	409.223	0.67156	0.0439948	XP_015062048.1|1.7e-164|extensin-2-like isoform X1 [Solanum pennellii]
BGI_novel_G000571	34.48	57.16	0.670902	8.65117e-07
Solyc01g080150.2	23.946	39.553	0.670822	1.56032e-06	NP_001266270.1|5.7e-189|adenylate isopentenyltransferase 3 [Solanum lycopersicum]
Solyc04g009040.2	3.276	5.43	0.670325	0.00108108	XP_004237172.4|0.0e+00|probable LRR receptor-like serine/threonine-protein kinase At3g47570 [Solanum lycopersicum]
Solyc08g005540.1	3.763	6.373	0.66854	0.0126453	XP_016436271.1|2.3e-265|PREDICTED: probable polyamine transporter At1g31830 isoform X1 [Nicotiana tabacum]
Solyc01g104690.2	82.47	137.333	0.6684	9.61988e-09	XP_016539166.1|9.9e-29|PREDICTED: uncharacterized protein LOC107839999 [Capsicum annuum]
Solyc08g068390.2	7.94	13.213	0.666195	0.000152011	XP_016537994.1|0.0e+00|PREDICTED: peroxisomal fatty acid beta-oxidation multifunctional protein AIM1-like [Capsicum annuum]
Solyc09g014730.2	21.79	35.726	0.664064	8.58035e-09	XP_010325785.1|0.0e+00|wall-associated receptor kinase 2-like [Solanum lycopersicum]
Solyc10g005500.2	18.46	30.223	0.663617	1.42765e-05	XP_019260466.1|4.7e-210|PREDICTED: metal tolerance protein 9-like isoform X1 [Nicotiana attenuata]
Solyc10g006560.2	73.69	121.21	0.663143	7.03775e-12	XP_004248368.1|2.4e-66|probable histone H2A.1 [Solanum lycopersicum]
Solyc10g084120.1	941.733	1543.71	0.662573	5.50372e-19	NP_001274308.1|2.8e-161|aquaporin PIP2-1-like [Solanum lycopersicum]
Solyc12g038680.1	53.796	89.523	0.66165	0.000259609	XP_022872443.1|2.9e-52|uncharacterized protein LOC111391446 [Olea europaea var. sylvestris]
Solyc05g052400.2	6.58	10.81	0.661227	0.000155708	XP_004239957.1|0.0e+00|laccase-12-like [Solanum lycopersicum]
Solyc07g053640.1	51.31	84.16	0.66086	5.24181e-05	XP_004243379.1|2.1e-305|GATA zinc finger domain-containing protein 14 [Solanum lycopersicum]
Solyc08g007680.1	8.706	14.23	0.660491	1.73052e-06	XP_019070588.1|0.0e+00|subtilisin-like protease SBT1.7 [Solanum lycopersicum]
Solyc07g064940.2	13.846	22.8	0.660251	0.000166127	XP_004244089.1|8.2e-153|thioredoxin-like protein HCF164, chloroplastic [Solanum lycopersicum]
Solyc01g087140.2	7.706	12.7	0.659801	0.000556152	XP_004229625.1|3.8e-213|uncharacterized protein LOC101245398 [Solanum lycopersicum]
Solyc05g046120.2	1.563	2.6	0.659587	0.0188614	XP_004240139.1|0.0e+00|formin-like protein 3 [Solanum lycopersicum]
Solyc05g015300.2	60.533	98.95	0.659566	5.9976e-12	XP_004239211.1|3.4e-195|BURP domain protein RD22 [Solanum lycopersicum]
Solyc08g005580.2	3.843	6.233	0.658476	0.000158013	XP_010324495.1|0.0e+00|ABC transporter G family member 14-like isoform X1 [Solanum lycopersicum]
Solyc12g098170.1	5.493	9.173	0.65715	0.0181761	XP_025884408.1|1.4e-182|F-box/kelch-repeat protein At3g06240-like [Solanum lycopersicum]
Solyc12g098850.1	113.21	185.693	0.65696	6.30823e-06	NP_001353312.1|4.6e-229|thioredoxin (TRX)-like superfamily protein [Solanum lycopersicum]
Solyc04g014360.2	6.256	10.393	0.655738	0.01298	XP_004236697.1|3.6e-152|transcription factor bHLH30-like [Solanum lycopersicum]
Solyc01g096430.2	54.176	89.476	0.655562	3.01549e-10	NP_001316467.1|3.7e-110|NAD(P)H:quinone oxidoreductase [Solanum lycopersicum]
Solyc04g080640.1	10.65	17.656	0.655475	0.00977925	XP_004238297.1|1.8e-144|uncharacterized protein LOC101245645 [Solanum lycopersicum]
Solyc09g008590.2	146.566	243.75	0.655445	0.000277151	XP_025888615.1|3.5e-79|pistil-specific extensin-like protein [Solanum lycopersicum]
Solyc04g078470.2	10.306	16.88	0.655426	0.000108138	NP_001234758.1|9.7e-191|D-type cyclin-3 [Solanum lycopersicum]
Solyc02g080310.2	4.003	6.563	0.655223	0.00389411	XP_015065693.1|6.2e-310|beta-glucosidase 18-like isoform X1 [Solanum pennellii]
Solyc03g116270.2	7.263	12.38	0.654924	0.0118334	XP_019068638.1|7.7e-184|flavonol synthase/flavanone 3-hydroxylase [Solanum lycopersicum]
Solyc03g007810.2	27.263	44.296	0.654791	4.97301e-10	XP_004234211.1|0.0e+00|plastidial pyruvate kinase 2 [Solanum lycopersicum]
BGI_novel_G000632	26.37	43.346	0.654508	0.000379301
Solyc04g074510.2	165.83	269.33	0.654127	6.25809e-15	BAV67091.1|3.2e-130|14-3-3 protein [Solanum tuberosum]
Solyc04g077860.2	10.796	17.963	0.653125	0.0276823	XP_004238093.1|1.3e-151|probable strigolactone esterase DAD2 [Solanum lycopersicum]
Solyc07g062210.2	4.476	7.41	0.653067	0.0115302	XP_004244290.1|8.8e-239|protein trichome birefringence-like 41 [Solanum lycopersicum]
Solyc10g009290.1	4.563	7.613	0.651714	0.0420183	XP_004248092.1|3.1e-258|transcription factor MYC3-like [Solanum lycopersicum]
Solyc02g081190.2	175.546	284.743	0.651538	9.48517e-16	NP_001233867.2|4.3e-185|1-aminocyclopropane-1-carboxylate oxidase [Solanum lycopersicum]
Solyc04g082220.1	32.943	53.616	0.650482	8.21651e-07	PHT51346.1|1.3e-216|Lysine histidine transporter-like 8 [Capsicum baccatum]
Solyc02g087800.2	4.503	7.453	0.648382	0.00877859	XP_004232229.1|4.8e-206|aldose 1-epimerase-like isoform X1 [Solanum lycopersicum]
Solyc10g085090.1	3.77	6.116	0.646586	0.00419883	XP_006338994.1|0.0e+00|PREDICTED: laccase-4-like [Solanum tuberosum]
Solyc11g044910.1	4.803	7.82	0.645823	0.000985468	NP_001266104.2|0.0e+00|alpha-L-arabinofuranosidase/beta-xylosidase precursor [Solanum lycopersicum]
Solyc03g082850.2	165.983	282.556	0.645195	1.11801e-05	XP_010318039.1|5.8e-292|uncharacterized protein LOC101265711 [Solanum lycopersicum]
Solyc08g082190.2	315.03	509.883	0.643256	7.37785e-14	PHT92269.1|2.7e-80|hypothetical protein T459_00151 [Capsicum annuum]
Solyc06g072390.2	10.61	17.626	0.643224	0.0308055	XP_010322511.1|9.8e-53|type IV inositol polyphosphate 5-phosphatase 9-like isoform X3 [Solanum lycopersicum]
Solyc01g100030.2	24.536	39.97	0.642565	0.000993139	XP_015065379.1|2.6e-119|deoxyuridine 5'-triphosphate nucleotidohydrolase [Solanum pennellii]
Solyc10g078320.1	1.73	2.846	0.641393	0.0183357	XP_010327746.1|0.0e+00|calmodulin-interacting protein 111 isoform X1 [Solanum lycopersicum]
Solyc04g009900.2	10.176	16.55	0.641379	0.000691271	NP_001234394.1|5.7e-161|phosphoenolpyruvate carboxylase kinase 1 [Solanum lycopersicum]
Solyc03g082780.1	24.96	40.24	0.640686	1.22312e-05	XP_015063241.1|3.4e-305|receptor-like protein Cf-9 [Solanum pennellii]
Solyc05g055760.2	53.776	86.74	0.640268	1.33422e-09	NP_001234853.1|5.2e-134|isopentenyl diphosphate isomerase 2 [Solanum lycopersicum]
Solyc02g089490.2	6.156	9.693	0.639947	0.00170687
Solyc02g081080.2	17.593	28.323	0.63824	2.28155e-08	NP_001333367.1|0.0e+00|O-fucosyltransferase family protein [Solanum lycopersicum]
Solyc11g040330.1	21.26	34.13	0.634952	4.80633e-08	XP_004250707.1|0.0e+00|uncharacterized protein LOC101263970 isoform X1 [Solanum lycopersicum]
Solyc08g007610.1	4.66	7.556	0.634263	0.00490801	XP_004244716.3|0.0e+00|subtilisin-like protease SBT1.7 [Solanum lycopersicum]
Solyc12g056960.1	93.956	150.366	0.632891	2.47029e-12	XP_004252539.2|2.3e-310|probable glucan 1,3-beta-glucosidase A [Solanum lycopersicum]
Solyc12g042570.1	5.543	8.866	0.63229	0.000970099	XP_004252301.1|1.8e-194|probable protein phosphatase 2C 60 [Solanum lycopersicum]
Solyc01g005760.2	1.316	2.156	0.631702	0.0477822	XP_004228617.1|0.0e+00|receptor-like protein Cf-9 [Solanum lycopersicum]
Solyc06g083170.2	3.3	5.373	0.630782	0.0172233	NP_001335304.1|7.4e-272|basic helix-loop-helix (bHLH) DNA-binding superfamily protein [Solanum lycopersicum]
Solyc03g111830.2	23.353	37.543	0.630701	2.89833e-06	XP_004236292.1|2.1e-170|protein-L-isoaspartate O-methyltransferase 1 [Solanum lycopersicum]
Solyc04g056620.1	33.433	53.763	0.630667	1.19601e-05	NP_001234230.1|8.6e-200|auxin efflux carrier component 10 [Solanum lycopersicum]
Solyc05g008300.1	3.83	6.483	0.629585	0.03726	XP_004238855.1|4.4e-159|heavy metal-associated isoprenylated plant protein 37 [Solanum lycopersicum]
Solyc10g083970.1	146.043	233.486	0.629441	7.43159e-11	XP_010312254.1|2.0e-229|S-adenosylmethionine synthase 3-like [Solanum lycopersicum]
Solyc03g119290.2	11.593	13.553	0.627153	1.54445e-08	PHU24293.1|2.5e-304|hypothetical protein BC332_09400 [Capsicum chinense]
Solyc09g007660.1	24.26	39.233	0.626699	0.00219115	XP_004246666.1|2.0e-131|fasciclin-like arabinogalactan protein 12 [Solanum lycopersicum]
Solyc01g103510.2	28.26	45.22	0.626683	2.96063e-06	XP_004230449.1|1.0e-228|60S ribosomal protein L3-2 [Solanum lycopersicum]
Solyc02g014830.2	13.323	21.266	0.625479	1.15931e-06	XP_004231499.1|4.7e-282|serine carboxypeptidase-like 34 [Solanum lycopersicum]
Solyc12g100140.1	4.68	7.56	0.624647	0.0110498	XP_010314674.1|3.1e-258|transcription factor bHLH130-like [Solanum lycopersicum]
Solyc06g060600.1	26.7	42.153	0.623659	2.61477e-07	XP_004242008.1|6.2e-181|probable trehalose-phosphate phosphatase F [Solanum lycopersicum]
Solyc01g010350.2	9.21	14.803	0.623634	0.000707537	XP_004228846.1|3.9e-232|triose phosphate/phosphate translocator, chloroplastic-like [Solanum lycopersicum]
Solyc02g082920.2	7.163	11.613	0.623243	0.0154101	NP_001234404.1|2.6e-148|acidic 26 kDa endochitinase precursor [Solanum lycopersicum]
Solyc09g008200.2	121.173	192.393	0.622586	2.03907e-16	XP_004246628.1|1.9e-222|heavy metal-associated isoprenylated plant protein 5 [Solanum lycopersicum]
Solyc02g086460.2	88.08	139.79	0.622154	1.43453e-08	XP_006338598.1|0.0e+00|PREDICTED: titin isoform X3 [Solanum tuberosum]
Solyc04g009590.2	59.306	95.996	0.622044	8.1597e-05	PHT54242.1|9.4e-29|Defensin-like protein 6 [Capsicum baccatum]
Solyc11g045460.1	10.503	16.49	0.621211	0.00644082	XP_004250778.1|9.9e-134|probable carboxylesterase 15 [Solanum lycopersicum]
Solyc10g084240.1	14.29	22.93	0.619721	0.00331548	XP_004249496.1|6.2e-192|peroxidase 21 [Solanum lycopersicum]
Solyc10g081360.1	9.85	14.74	0.619171	0.00203088	XP_004249362.1|2.0e-84|co-chaperone protein p23-2 isoform X2 [Solanum lycopersicum]
Solyc01g079370.2	8.716	14.046	0.618593	0.0038557	XP_010322387.1|0.0e+00|DELLA protein RGL1-like [Solanum lycopersicum]
Solyc02g005180.2	17.883	29.683	0.618099	4.65906e-06	XP_004231463.1|4.3e-209|sugar transporter ERD6-like 5 isoform X1 [Solanum lycopersicum]
Solyc02g083680.1	43.69	68.996	0.617868	1.79203e-11	XP_025885285.1|0.0e+00|histidine kinase 1 isoform X1 [Solanum lycopersicum]
Solyc08g078060.2	33.266	53.143	0.615888	1.43229e-06	XP_004245814.1|6.5e-65|uncharacterized protein LOC101245084 isoform X1 [Solanum lycopersicum]
Solyc07g007690.2	6.75	10.56	0.615285	1.25628e-05	XP_009777968.1|0.0e+00|PREDICTED: putative chloride channel-like protein CLC-g isoform X1 [Nicotiana sylvestris]
Solyc06g053490.2	9.426	15.14	0.615125	0.00547454	XP_004241002.1|6.9e-77|protein FAM136A [Solanum lycopersicum]
Solyc01g009410.2	12.173	19.53	0.614681	0.00392961	XP_004228865.1|3.5e-190|peroxidase 57-like [Solanum lycopersicum]
Solyc11g066060.1	130.44	206.75	0.61421	5.0004e-05	AAR17080.1|0.0e+00|heat shock protein 70-3 [Nicotiana tabacum]
Solyc02g062690.2	4.376	7.05	0.613366	0.0329406	XP_004233521.1|7.9e-171|transcription factor HBI1 [Solanum lycopersicum]
Solyc11g040150.1	75.113	118.326	0.613005	1.29392e-16	XP_004250702.1|2.4e-285|heparan-alpha-glucosaminide N-acetyltransferase [Solanum lycopersicum]
Solyc07g047610.2	4.543	7.246	0.61256	0.00850637	XP_004243566.1|0.0e+00|transcriptional adapter ADA2 isoform X1 [Solanum lycopersicum]
Solyc08g005630.2	1.98	3.19	0.61247	0.0461007	NP_001317921.1|0.0e+00|alcohol oxidase [Solanum lycopersicum]
Solyc10g083670.1	9.913	15.713	0.611903	0.000141605	XP_016543464.1|5.2e-297|PREDICTED: glucomannan 4-beta-mannosyltransferase 9 [Capsicum annuum]
Solyc07g006850.1	6.776	10.866	0.611628	0.0100645	XP_004243015.1|2.2e-200|probable xyloglucan endotransglucosylase/hydrolase protein 25 [Solanum lycopersicum]
Solyc01g090840.2	3.956	6.38	0.610904	0.0404153	XP_010325535.1|1.3e-201|zinc finger protein ZAT9-like [Solanum lycopersicum]
Solyc04g080840.1	5.006	7.896	0.610242	0.00583688	PHT51247.1|0.0e+00|Beta-galactosidase 5 [Capsicum baccatum]
Solyc09g065520.2	17.173	27.143	0.610133	6.98634e-06	XP_015088591.1|2.6e-195|homocysteine S-methyltransferase 2 isoform X1 [Solanum pennellii]
Solyc01g006060.2	25.473	40.606	0.609648	0.000425009	XP_004228729.1|2.0e-102|dirigent protein 19 [Solanum lycopersicum]
Solyc03g025800.2	29.086	46.22	0.608619	8.22121e-06	XP_010317603.3|2.7e-40|LOW QUALITY PROTEIN: heavy metal-associated isoprenylated plant protein 39 [Solanum lycopersicum]
Solyc02g092210.1	6.47	10.296	0.607339	0.00628562	XP_004231939.1|2.2e-272|glycosyltransferase 6-like [Solanum lycopersicum]
Solyc09g011820.2	2.643	4.233	0.606076	0.0375637	XP_004246854.2|1.1e-287|putative GPI-anchored protein pfl2 [Solanum lycopersicum]
Solyc08g082900.2	3.146	5	0.603975	0.01098	XP_004245475.1|0.0e+00|uncharacterized protein LOC101244103 [Solanum lycopersicum]
Solyc06g064980.2	9.013	14.906	0.60156	0.00144487	XP_004241847.1|1.0e-223|GDSL esterase/lipase 5 [Solanum lycopersicum]
Solyc06g008030.2	4.786	7.61	0.600939	0.00134346	XP_010321805.1|5.8e-299|transcription factor PIF1 isoform X1 [Solanum lycopersicum]
Solyc10g017960.1	15.9	25.193	0.600675	0.00321094	XP_004248570.1|6.6e-169|F-box protein PP2-A13 [Solanum lycopersicum]
Solyc09g090300.2	19.76	31.176	0.599735	6.03336e-05	XP_004247743.1|3.8e-90|dCTP pyrophosphatase 1 isoform X2 [Solanum lycopersicum]
Solyc03g118090.2	16.316	25.4	0.598447	7.40718e-08	XP_015068162.1|2.5e-293|calcium-binding mitochondrial carrier protein SCaMC-1-like [Solanum pennellii]
Solyc12g011340.1	59.09	92.64	0.597951	6.33489e-10	XP_004251830.1|1.1e-183|polyadenylate-binding protein-interacting protein 8 isoform X4 [Solanum lycopersicum]
Solyc04g058150.2	185.256	293.38	0.59788	6.71417e-06	NP_001234720.1|9.0e-41|metallothionein-like protein type 2 A [Solanum lycopersicum]
Solyc10g052600.1	11.736	18.5	0.597844	0.00143671	XP_004248708.1|1.0e-236|probable methyltransferase PMT19 [Solanum lycopersicum]
Solyc03g005450.2	5.016	7.92	0.597281	0.0134283	XP_004234035.1|0.0e+00|cellulose synthase-like protein G2 [Solanum lycopersicum]
Solyc08g067510.1	145.08	231.666	0.596972	6.0008e-05	XP_004245220.1|2.7e-63|non-specific lipid-transfer protein 1 [Solanum lycopersicum]
Solyc12g049420.1	14.903	22.973	0.596908	0.000204083	XP_004252403.1|4.2e-120|25.3 kDa vesicle transport protein [Solanum lycopersicum]
Solyc01g010000.2	20.58	32.136	0.596338	1.35885e-07	XP_004228427.1|6.5e-258|ACT domain-containing protein ACR4 [Solanum lycopersicum]
Solyc06g071640.2	8.023	12.61	0.595687	0.000893293	XP_004242159.1|1.2e-258|tryptophan aminotransferase-related protein 2 isoform X1 [Solanum lycopersicum]
Solyc01g100780.2	3.07	4.833	0.594614	0.0365887	XP_004230328.1|2.1e-191|DUF724 domain-containing protein 3 [Solanum lycopersicum]
Solyc11g045530.1	15.963	25.516	0.59434	0.0200122	XP_004250781.1|9.1e-94|LOB domain-containing protein 4 [Solanum lycopersicum]
Solyc12g100250.1	17.1	26.963	0.594285	0.00364703	XP_004252862.1|1.4e-232|delta(12)-fatty-acid desaturase FAD2 isoform X1 [Solanum lycopersicum]
Solyc10g086520.1	13.763	21.796	0.594152	0.0159819	NP_001334904.1|4.2e-125|expansin precursor [Solanum lycopersicum]
Solyc03g096840.2	90.79	143.113	0.593627	0.00052379	XP_004235359.1|2.8e-64|late embryogenesis abundant protein At5g17165 isoform X1 [Solanum lycopersicum]
Solyc02g021340.2	4.246	7.04	0.593228	0.031238	XP_004231534.1|3.0e-156|transport and Golgi organization 2 homolog [Solanum lycopersicum]
Solyc10g076730.1	15.766	24.963	0.592222	0.00645264	XP_004249077.1|2.6e-114|pectinesterase inhibitor 7-like [Solanum lycopersicum]
Solyc01g086800.2	55.066	86.766	0.592152	0.000382518	XP_004512510.2|1.7e-67|LOW QUALITY PROTEIN: histone H3.2 [Cicer arietinum]
Solyc02g083480.2	6.97	11.013	0.591412	0.0275123	XP_004232515.1|4.0e-177|peroxidase 64-like [Solanum lycopersicum]
Solyc08g082820.2	137.393	213.666	0.590392	9.84664e-06	NP_001234636.2|0.0e+00|luminal-binding protein precursor [Solanum lycopersicum]
Solyc03g043740.2	35.686	55.946	0.589473	0.000453541	XP_004234638.1|2.3e-77|uncharacterized protein At5g65660 [Solanum lycopersicum]
Solyc04g080550.2	18.71	29.17	0.589042	9.73672e-06	PHT28359.1|6.1e-158|Isoflavone reductase-like protein [Capsicum baccatum]
Solyc07g008560.2	74.18	115.143	0.588485	4.90816e-07	XP_015082561.1|0.0e+00|probable inactive purple acid phosphatase 27 [Solanum pennellii]
Solyc09g090980.2	124.55	194.926	0.588299	2.21351e-05	NP_001275580.1|3.0e-86|pathogenesis-related protein STH-2-like [Solanum lycopersicum]
Solyc02g092800.2	46.763	72.63	0.588062	1.04007e-08	XP_009616361.1|9.5e-264|PREDICTED: metal transporter Nramp3-like [Nicotiana tomentosiformis]
Solyc08g083270.1	6.22	9.826	0.58712	0.0289202	NP_001265925.1|4.4e-190|Hop-interacting protein THI143 [Solanum lycopersicum]
Solyc11g073260.1	24.5	39.223	0.586961	0.022585	XP_019066553.1|5.6e-73|histone H2A isoform X4 [Solanum lycopersicum]
Solyc07g014670.2	15.333	23.776	0.584814	2.98519e-06	XP_004242874.1|7.7e-300|cytochrome P450 81D11 [Solanum lycopersicum]
Solyc04g081240.2	10.526	16.276	0.584611	3.02557e-06	NP_001234545.1|0.0e+00|auxin response factor 5 [Solanum lycopersicum]
Solyc01g073640.2	20.913	32.536	0.583848	0.000413441	NP_001233856.1|6.9e-138|yfe37 protein [Solanum lycopersicum]
Solyc12g096870.1	11.693	18.18	0.582986	0.000188025	XP_004253024.1|2.9e-286|cinnamate beta-D-glucosyltransferase-like [Solanum lycopersicum]
Solyc05g007800.2	11.58	18.096	0.581447	0.00537972	XP_010320691.1|9.0e-84|uncharacterized protein LOC101245646 [Solanum lycopersicum]
Solyc01g100120.2	1.343	2.243	0.581384	0.0367255	XP_004230273.1|0.0e+00|kinesin-like protein KIN-14I isoform X1 [Solanum lycopersicum]
Solyc01g088550.2	10.356	16.106	0.580464	0.00220009	XP_004229705.1|5.5e-200|probable purine permease 11 isoform X1 [Solanum lycopersicum]
Solyc12g009840.1	3.916	6.12	0.580332	0.0128163	XP_015059373.1|0.0e+00|pyrophosphate-energized vacuolar membrane proton pump-like [Solanum pennellii]
Solyc11g040340.1	24	37.116	0.579909	4.01869e-05	XP_019228899.1|3.3e-266|PREDICTED: endoglucanase 9-like [Nicotiana attenuata]
BGI_novel_G000304	5.776	8.993	0.579219	0.00471421
Solyc12g056920.1	31.176	48.103	0.578898	1.18157e-06	XP_004252542.2|0.0e+00|low affinity sulfate transporter 3-like [Solanum lycopersicum]
Solyc01g097020.2	113.283	178.073	0.577645	0.000812368	XP_015063207.1|5.0e-20|succinate dehydrogenase subunit 8, mitochondrial-like [Solanum pennellii]
Solyc11g006990.1	49.453	76.466	0.577271	0.000132801	XP_004249967.1|4.1e-232|protein trichome birefringence-like 36 [Solanum lycopersicum]
Solyc01g109320.2	9.36	14.506	0.577003	0.000626761	XP_009802671.1|3.4e-256|PREDICTED: protein TRANSPARENT TESTA 12-like [Nicotiana sylvestris]
Solyc03g117480.2	43.636	67.09	0.576893	1.23301e-06	NP_001307479.1|0.0e+00|pyrophosphate-energized vacuolar membrane proton pump 2 [Solanum lycopersicum]
Solyc09g066310.2	14.67	22.736	0.575714	0.000626108	XP_004247234.1|3.7e-192|hyoscyamine 6-dioxygenase-like [Solanum lycopersicum]
Solyc03g019680.2	15.053	23.163	0.575682	1.33786e-06	XP_004234305.1|4.9e-309|CBS domain-containing protein CBSCBSPB5-like [Solanum lycopersicum]
Solyc06g076660.2	38.553	59.75	0.575464	0.00240721	NP_001234844.1|1.1e-144|proliferating cell nuclear antigen [Solanum lycopersicum]
Solyc09g008860.2	20.226	31.143	0.573545	0.000425009	XP_004246576.2|0.0e+00|leucine-rich repeat receptor-like protein kinase PXC1 [Solanum lycopersicum]
BGI_novel_G000337	6.776	10.433	0.573528	0.000485833
Solyc03g114390.1	14.456	22.45	0.573269	0.00168306	XP_019068601.2|1.6e-153|protein MIZU-KUSSEI 1 [Solanum lycopersicum]
Solyc02g069520.2	10.726	16.58	0.573006	0.000626108	XP_004233193.1|2.0e-112|mediator of RNA polymerase II transcription subunit 9 [Solanum lycopersicum]
Solyc01g087570.2	26.63	41.54	0.572732	0.00286499	OIT07905.1|1.5e-25|hypothetical protein A4A49_33762 [Nicotiana attenuata]
Solyc02g090360.2	52.186	80.016	0.571861	6.76454e-07	PHT56939.1|2.3e-299|L-ascorbate oxidase -like protein [Capsicum baccatum]
Solyc08g006790.2	62.713	97.21	0.571483	0.000254866	XP_004244524.1|8.4e-95|early nodulin-like protein 3 [Solanum lycopersicum]
Solyc02g087330.2	173.426	269.78	0.570747	6.96831e-05	XP_004232259.1|1.7e-45|uncharacterized protein LOC101265497 [Solanum lycopersicum]
Solyc10g006480.1	506.053	773.533	0.568709	7.42841e-12	XP_022879942.1|2.7e-254|polyubiquitin isoform X1 [Olea europaea var. sylvestris]
Solyc09g090550.2	7.336	11.17	0.567411	0.00580124	XP_010326787.1|2.2e-213|actin-related protein 2/3 complex subunit 2B isoform X4 [Solanum lycopersicum]
Solyc10g079290.1	2.963	4.553	0.56716	0.0137202	XP_004249210.1|0.0e+00|outer envelope protein 80, chloroplastic isoform X1 [Solanum lycopersicum]
Solyc03g114900.2	5.863	9.046	0.566746	0.00633275	XP_006345105.1|3.6e-271|PREDICTED: COBRA-like protein 4 [Solanum tuberosum]
Solyc03g032090.1	10.043	15.466	0.566391	0.00392021	XP_010317678.1|1.7e-245|amino acid transporter AVT3B [Solanum lycopersicum]
Solyc07g016220.2	17.58	27.293	0.565822	0.00800653	XP_004242887.1|2.3e-35|organ-specific protein S2-like [Solanum lycopersicum]
Solyc03g096900.2	5.336	8.19	0.565494	0.00318459	XP_004235275.1|0.0e+00|uncharacterized protein LOC101246032 isoform X1 [Solanum lycopersicum]
Solyc04g016000.2	12.343	18.976	0.565341	0.0020541	XP_004236602.1|2.4e-130|heat stress transcription factor B-3 [Solanum lycopersicum]
Solyc11g073250.1	351.536	545.896	0.565173	1.91604e-07	XP_004251320.1|8.7e-77|histone H2A isoform X1 [Solanum lycopersicum]
Solyc11g069450.1	50.976	79.473	0.56515	0.00692168	XP_004251136.1|3.9e-92|uncharacterized protein LOC101259309 [Solanum lycopersicum]
Solyc05g055020.2	7.19	11.133	0.563954	0.0191994	XP_004239743.1|1.4e-123|protein LIGHT-DEPENDENT SHORT HYPOCOTYLS 1-like [Solanum lycopersicum]
Solyc02g079440.1	16.116	24.653	0.563621	3.95466e-05	XP_004232774.1|0.0e+00|berberine bridge enzyme-like 22 [Solanum lycopersicum]
Solyc03g093650.2	3.183	4.866	0.563111	0.000731543	XP_010318180.1|0.0e+00|putative ABC transporter B family member 8 [Solanum lycopersicum]
Solyc11g072580.1	11.61	17.77	0.562847	0.000269494	XP_004251446.1|0.0e+00|protein NRT1/ PTR FAMILY 2.7-like [Solanum lycopersicum]
Solyc04g018170.1	5.39	7.06	0.562376	0.00221096
Solyc09g090140.2	698.396	1063.81	0.561831	1.15359e-13	XP_004247734.1|7.2e-186|malate dehydrogenase [Solanum lycopersicum]
Solyc04g011760.2	34.68	54.726	0.561134	0.0416463
Solyc02g093290.2	18.886	28.7	0.55928	5.24158e-07	XP_009607893.1|5.2e-311|PREDICTED: nicotinate phosphoribosyltransferase 2-like isoform X2 [Nicotiana tomentosiformis]
Solyc07g053950.1	21.9	34.1	0.559276	0.0299423	XP_010323740.1|1.6e-96|uncharacterized protein LOC104648387 [Solanum lycopersicum]
Solyc01g073970.2	19.94	30.92	0.559093	0.0151638	XP_004512510.2|5.4e-71|LOW QUALITY PROTEIN: histone H3.2 [Cicer arietinum]
Solyc04g079030.2	7.493	11.393	0.558887	3.69909e-05	XP_004238162.1|2.0e-270|UDP-glycosyltransferase 79B6-like [Solanum lycopersicum]
Solyc09g090210.2	33.58	51.103	0.558809	5.97183e-08	XP_004247739.1|7.1e-202|probable protein kinase At2g41970 [Solanum lycopersicum]
Solyc02g089220.2	10.913	16.553	0.557497	0.000712071	XP_004232136.1|3.3e-280|ultraviolet-B receptor UVR8 [Solanum lycopersicum]
Solyc03g119640.2	6.093	9.293	0.557422	0.00146436	NP_001340702.1|0.0e+00|aluminum-activated malate transporter ALMT5 [Solanum lycopersicum]
Solyc05g010080.2	44.873	68.343	0.557337	5.78096e-06	XP_004238980.1|3.8e-153|lysine-rich arabinogalactan protein 19 [Solanum lycopersicum]
Solyc11g013770.1	5.013	7.393	0.557209	0.00628562
Solyc04g045660.2	4.026	6.083	0.557094	0.00535318	XP_015071531.1|0.0e+00|DNA mismatch repair protein MLH1 isoform X1 [Solanum pennellii]
Solyc01g098100.2	22.373	34.273	0.556898	0.000888338	XP_010312241.1|5.1e-104|60S ribosome subunit biogenesis protein NIP7 homolog [Solanum lycopersicum]
Solyc01g087740.1	18.89	28.666	0.556857	9.16542e-07	XP_004229661.3|0.0e+00|subtilisin-like protease SBT1.9 [Solanum lycopersicum]
Solyc01g108300.2	16.926	25.943	0.556813	0.006087	NP_001297051.1|7.8e-232|Myb family transcription factor [Solanum lycopersicum]
Solyc01g104010.2	6.14	9.456	0.556719	0.0236179	XP_004230482.1|9.8e-183|uncharacterized protein LOC101250842 [Solanum lycopersicum]
Solyc02g092810.2	17.513	26.786	0.556329	0.000540296	XP_004231892.1|6.5e-95|death-associated inhibitor of apoptosis 1 [Solanum lycopersicum]
Solyc10g006500.2	4.856	7.426	0.555764	0.00712956	XP_009611117.1|7.0e-277|PREDICTED: probable galacturonosyltransferase 12 [Nicotiana tomentosiformis]
Solyc10g076790.1	16.263	24.73	0.555404	8.29283e-05	NP_001234688.1|3.5e-292|auxin transporter-like protein 4 [Solanum lycopersicum]
Solyc04g080880.2	14.953	22.596	0.552252	8.77569e-07	XP_004238304.1|1.3e-269|zingipain-2 [Solanum lycopersicum]
Solyc11g066250.1	6.983	10.74	0.551808	0.00783883	XP_004250970.1|4.7e-300|serine carboxypeptidase-like [Solanum lycopersicum]
Solyc04g008860.2	11.313	17.18	0.550168	0.00106071	XP_004236865.1|9.8e-256|probable protein arginine N-methyltransferase 6 [Solanum lycopersicum]
Solyc02g086900.2	4.026	6.15	0.549727	0.0238196	XP_004232291.1|7.5e-276|deoxynucleoside triphosphate triphosphohydrolase SAMHD1 homolog [Solanum lycopersicum]
Solyc11g007200.1	1910.38	2916.99	0.547799	2.58024e-08	XP_004249983.1|1.8e-58|copper transport protein ATX1 isoform X2 [Solanum lycopersicum]
Solyc06g051550.2	84.48	128.443	0.547485	0.000206071	NP_001234654.2|5.9e-173|bHLH transcriptional regulator [Solanum lycopersicum]
Solyc02g085730.2	25.84	39.07	0.546762	5.04551e-06	NP_001234019.1|1.3e-133|allene oxide cyclase [Solanum lycopersicum]
Solyc01g108400.2	21.773	32.776	0.545803	1.15421e-06	XP_015062453.1|0.0e+00|CDPK-related kinase 5-like [Solanum pennellii]
Solyc06g068710.2	24.803	37.37	0.544986	1.56133e-05	XP_004241663.2|2.4e-49|40S ribosomal protein S27-3-like isoform X1 [Solanum lycopersicum]
Solyc09g005630.2	7.37	11.17	0.544331	0.00585099	XP_006366946.1|4.3e-253|PREDICTED: protein trichome birefringence-like 3 [Solanum tuberosum]
Solyc05g051870.2	15.223	23.26	0.542885	0.0158423	XP_010321468.2|2.6e-75|anther-specific protein LAT52-like [Solanum lycopersicum]
Solyc05g006790.1	5.246	7.98	0.542144	0.00213605	XP_019069652.2|2.3e-281|uncharacterized protein LOC101256184 [Solanum lycopersicum]
Solyc11g066390.1	67.3	101.953	0.541459	3.85608e-06	NP_001234769.2|1.9e-120|superoxide dismutase [Cu-Zn], chloroplastic [Solanum lycopersicum]
Solyc06g083340.2	109.366	163.21	0.541252	1.56133e-05	RDX73010.1|7.2e-19|Wound-induced basic protein, partial [Mucuna pruriens]
Solyc05g055680.2	17.74	24.743	0.541074	0.00832401	XP_015075689.1|1.4e-54|uncharacterized protein LOC107019833 [Solanum pennellii]
Solyc05g009170.1	34	51.636	0.541059	0.00085685	XP_004238916.1|9.8e-122|zinc finger protein GIS3 [Solanum lycopersicum]
Solyc02g079790.2	14.87	22.663	0.540619	0.0327235	XP_004232763.1|2.0e-83|uncharacterized protein LOC101268247 isoform X2 [Solanum lycopersicum]
Solyc03g112330.2	8.52	13.093	0.540246	0.023728	XP_010319013.1|1.7e-120|uncharacterized protein LOC101266322 [Solanum lycopersicum]
Solyc02g072480.2	1.806	2.736	0.539772	0.0405623	XP_010316828.2|0.0e+00|probable LRR receptor-like serine/threonine-protein kinase At3g47570 [Solanum lycopersicum]
Solyc06g005470.2	6054.25	9159.15	0.53949	3.83795e-06	Q43515.1|4.1e-21|RecName: Full=Metallothionein-like protein type 2
Solyc03g006220.2	15.85	23.873	0.539134	0.000188125	XP_004234094.3|6.8e-215|protein trichome birefringence-like 38 [Solanum lycopersicum]
Solyc11g007330.1	15.346	23.59	0.539114	0.0371218	XP_004249990.1|8.2e-84|calponin homology domain-containing protein DDB_G0272472 [Solanum lycopersicum]
Solyc06g084820.1	14.703	22.176	0.538618	0.000901904	XP_004241763.1|4.1e-284|geraniol 8-hydroxylase [Solanum lycopersicum]
Solyc06g050730.2	176.12	266.69	0.537959	1.71492e-10	XP_004240896.1|1.1e-94|uncharacterized protein LOC101265648 [Solanum lycopersicum]
Solyc02g078040.2	122.42	183.78	0.537674	6.36815e-07	XP_004232891.1|1.3e-152|pistil-specific extensin-like protein [Solanum lycopersicum]
Solyc01g108630.2	16.826	25.346	0.537512	0.014509	NP_001333834.1|0.0e+00|nitrite reductase [Solanum lycopersicum]
Solyc01g111310.2	23.043	34.546	0.537092	0.000259609	NP_001234675.1|1.3e-299|auxin transporter-like protein 2 [Solanum lycopersicum]
Solyc02g078900.2	9.21	13.83	0.53704	0.0019219	XP_015066385.1|0.0e+00|internal alternative NAD(P)H-ubiquinone oxidoreductase A2, mitochondrial-like [Solanum pennellii]
Solyc12g100080.1	60.803	92.256	0.53698	0.00921526	XP_004252859.1|1.7e-200|protein PELPK1-like [Solanum lycopersicum]
Solyc06g083080.2	18.426	27.8	0.53683	0.0017941	XP_004242436.1|2.0e-87|uncharacterized protein LOC101256601 [Solanum lycopersicum]
Solyc04g011390.1	117.19	181.243	0.536791	0.00700348	PHT46786.1|3.4e-51|Histone H4 [Capsicum baccatum]
Solyc10g080100.1	8.453	12.753	0.534812	5.17742e-05	XP_004249261.1|0.0e+00|villin-2-like [Solanum lycopersicum]
Solyc07g049360.2	109.736	165.136	0.534365	1.42825e-06	XP_004243516.1|6.0e-47|small ubiquitin-related modifier 1 [Solanum lycopersicum]
Solyc10g086190.1	229.55	343.936	0.534247	3.50722e-07	XP_004249586.1|3.3e-196|adenosine kinase 2 [Solanum lycopersicum]
Solyc10g008320.1	26.473	40.186	0.533705	0.0149909	XP_010327073.1|2.5e-114|uncharacterized protein LOC104649465 [Solanum lycopersicum]
Solyc10g081370.1	93.646	141.41	0.532495	3.18559e-05	XP_004249363.1|9.9e-44|probable small nuclear ribonucleoprotein F [Solanum lycopersicum]
Solyc01g006400.2	72.193	107.823	0.529953	8.85204e-05	PNW70738.1|1.2e-16|hypothetical protein CHLRE_17g732533v5 [Chlamydomonas reinhardtii]
Solyc02g082960.2	46.93	70.306	0.529908	0.00200369	XP_006340814.1|3.0e-135|PREDICTED: basic endochitinase-like [Solanum tuberosum]
Solyc06g061230.2	332.346	499.78	0.529854	8.62286e-10	PHU14711.1|1.2e-27|hypothetical protein BC332_15916 [Capsicum chinense]
Solyc01g086820.2	120.906	181.41	0.529824	0.000103078	XP_016549484.1|1.8e-71|PREDICTED: uncharacterized protein LOC107849419 [Capsicum annuum]
Solyc12g009930.1	18.26	27.356	0.529677	0.00124159	XP_004251744.1|1.0e-228|zeatin O-glucosyltransferase [Solanum lycopersicum]
Solyc12g005200.1	13.953	20.95	0.527884	0.00490801	XP_004251475.1|5.1e-192|electron transfer flavoprotein subunit alpha, mitochondrial [Solanum lycopersicum]
Solyc04g078650.2	17.043	25.6	0.526203	0.00736011	NP_001234251.1|2.9e-139|WOX4 [Solanum lycopersicum]
Solyc11g020280.1	8.506	12.636	0.525803	0.000164885	XP_004250411.1|0.0e+00|receptor protein-tyrosine kinase CEPR2 [Solanum lycopersicum]
Solyc05g006340.2	8.823	13.17	0.525783	0.00702661	XP_004238721.1|5.4e-244|protein JINGUBANG [Solanum lycopersicum]
BGI_novel_G000469	10.22	15.426	0.525612	0.0404153
Solyc05g053960.2	118.436	176.396	0.52473	2.99011e-06	XP_004239837.1|6.1e-116|uncharacterized protein LOC101252396 [Solanum lycopersicum]
Solyc12g056530.1	64.176	95.513	0.523388	2.18669e-06	XP_004252579.1|5.6e-196|fructose-1,6-bisphosphatase, cytosolic [Solanum lycopersicum]
Solyc04g014450.1	6.22	9.333	0.522317	0.000849024	XP_010319233.1|0.0e+00|uncharacterized protein LOC101260634 [Solanum lycopersicum]
Solyc09g063150.2	57.93	86.52	0.522125	0.000244893	XP_004247117.1|1.2e-125|probable glutathione S-transferase [Solanum lycopersicum]
Solyc03g116860.2	7.56	11.293	0.521857	0.00895741	XP_004235944.1|1.4e-242|probable N-acetyltransferase HLS1 [Solanum lycopersicum]
Solyc12g019570.1	3.866	5.93	0.521431	0.0435493	XP_004252000.2|4.1e-152|serine carboxypeptidase-like 7 isoform X1 [Solanum lycopersicum]
Solyc10g085380.1	21.913	32.686	0.521178	0.00269787	XP_004249651.1|1.6e-173|short-chain dehydrogenase reductase 2a isoform X2 [Solanum lycopersicum]
Solyc03g116140.2	13.9	20.66	0.520883	0.000885235	XP_004236005.1|2.4e-232|activating signal cointegrator 1 [Solanum lycopersicum]
Solyc07g054170.2	10.946	16.34	0.52077	0.0122086	XP_004243343.1|1.1e-158|expansin-B3 [Solanum lycopersicum]
Solyc08g061020.1	10.77	16.553	0.520158	0.0269921	XP_004245323.1|1.5e-160|protein NRT1/ PTR FAMILY 6.2-like [Solanum lycopersicum]
Solyc11g065040.1	4.766	7.153	0.51997	0.0497684	XP_025884074.1|1.7e-93|protein-lysine N-methyltransferase EFM3 isoform X2 [Solanum lycopersicum]
Solyc11g007210.1	157.343	234.64	0.518558	0.000577093	XP_004249984.1|2.4e-191|peroxidase 5 [Solanum lycopersicum]
Solyc03g070440.2	12.41	18.416	0.518312	0.00127771	XP_015068060.1|1.8e-264|COBRA-like protein 4 [Solanum pennellii]
Solyc09g007630.2	28.526	42.193	0.517846	2.32346e-05	NP_001234332.2|1.1e-284|P58IPK-like protein [Solanum lycopersicum]
Solyc11g069560.1	7.993	11.816	0.517592	0.00113359	XP_004251147.1|0.0e+00|uncharacterized protein LOC101262484 [Solanum lycopersicum]
Solyc01g104400.2	244.8	365.366	0.517327	0.000381829	XP_004230515.1|1.4e-65|basic blue protein [Solanum lycopersicum]
Solyc12g010170.1	13.653	20.326	0.516396	0.00434671	XP_004251756.1|9.2e-219|transcription factor bHLH66 isoform X1 [Solanum lycopersicum]
Solyc04g050790.2	19.49	29.11	0.515722	0.00714173	XP_004237501.1|1.0e-77|uncharacterized protein LOC101243779 [Solanum lycopersicum]
Solyc04g078740.2	5.97	8.836	0.515455	0.00428386	XP_010320328.1|0.0e+00|subtilisin-like protease SBT1.9 [Solanum lycopersicum]
Solyc05g053080.2	78.766	117.48	0.514972	0.00040437	XP_004239905.1|1.7e-38|dehydrin HIRD11 [Solanum lycopersicum]
Solyc10g007640.2	11.293	16.8	0.514863	0.00714173	XP_004248222.1|9.5e-127|probable glutathione S-transferase [Solanum lycopersicum]
Solyc02g089340.2	2.26	3.573	0.514569	0.0104523	XP_004232127.1|0.0e+00|LOW QUALITY PROTEIN: DNA-directed RNA polymerase 2B, chloroplastic/mitochondrial [Solanum lycopersicum]
Solyc05g051640.2	6.103	9	0.513933	0.00224191	XP_015074895.1|0.0e+00|leucine-rich repeat receptor-like protein kinase TDR [Solanum pennellii]
Solyc08g080930.1	4.196	6.243	0.513833	0.0282961	XP_010325411.2|0.0e+00|xyloglucan-specific galacturonosyltransferase 1 [Solanum lycopersicum]
Solyc08g079730.1	13.2	19.556	0.513408	0.00696369	XP_004245689.1|4.1e-277|protein DETOXIFICATION 56-like [Solanum lycopersicum]
Solyc06g051800.2	19.243	28.463	0.513062	0.00298528	NP_001233958.1|6.7e-158|expansin precursor [Solanum lycopersicum]
Solyc04g008810.2	70.053	103.556	0.512337	5.97655e-05	XP_004236871.1|5.4e-70|40S ribosomal protein S26-3 [Solanum lycopersicum]
Solyc08g079490.2	26.103	38.903	0.512263	0.0053712	XP_004245711.1|1.2e-129|peptidyl-tRNA hydrolase ICT1, mitochondrial isoform X2 [Solanum lycopersicum]
Solyc01g074000.2	118.11	175.38	0.512025	0.000190819	XP_004512510.2|3.9e-70|LOW QUALITY PROTEIN: histone H3.2 [Cicer arietinum]
Solyc07g043420.2	154.663	227.933	0.511473	0.000199503	NP_001233775.1|5.6e-202|2-oxoglutarate-dependent dioxygenase 2 [Solanum lycopersicum]
Solyc01g111300.2	236.78	349.603	0.510325	3.19601e-05	XP_002305502.1|2.9e-71|glycine-rich protein 2 [Populus trichocarpa]
Solyc03g097940.2	6.946	9.83	0.510304	0.00105843	XP_004235283.1|0.0e+00|potassium channel SKOR-like [Solanum lycopersicum]
Solyc01g066440.2	7.843	11.68	0.509952	0.0483258	XP_004229260.1|8.4e-104|uncharacterized protein LOC101259876 [Solanum lycopersicum]
Solyc10g084690.1	5.206	7.74	0.50939	0.0450753	XP_004249530.1|1.5e-273|probable ADP-ribosylation factor GTPase-activating protein AGD6 [Solanum lycopersicum]
Solyc06g071530.2	127.566	188.43	0.508846	4.4013e-06	XP_004241547.1|1.7e-56|60S ribosomal protein L44 [Solanum lycopersicum]
Solyc06g068240.2	4.99	7.37	0.50849	0.0241598	XP_004241690.1|0.0e+00|pyrophosphate-energized vacuolar membrane proton pump-like [Solanum lycopersicum]
Solyc01g109220.2	83.053	116.616	0.507738	8.59122e-05	XP_004230848.1|2.7e-23|mitochondrial import receptor subunit TOM6 homolog [Solanum lycopersicum]
Solyc09g072700.2	41.92	61.663	0.5069	3.58444e-05	XP_004247506.1|2.8e-184|peroxidase 44-like [Solanum lycopersicum]
Solyc11g005050.1	121.056	180.206	0.506888	1.63503e-05	XP_010312453.1|3.8e-25|uncharacterized protein LOC101256825 [Solanum lycopersicum]
Solyc12g009590.1	15.193	22.353	0.506062	0.00119657	XP_004251723.1|4.4e-246|methyl-CpG-binding domain-containing protein 11-like [Solanum lycopersicum]
Solyc10g079510.1	1.653	2.476	0.504296	0.0391291	XP_019071588.1|0.0e+00|Fanconi anemia group J protein homolog [Solanum lycopersicum]
Solyc01g079530.2	10.833	16.033	0.503394	0.0223237	XP_004229398.1|9.1e-126|uncharacterized protein LOC101244523 [Solanum lycopersicum]
Solyc09g059460.2	81.836	119.576	0.502286	6.20111e-09	XP_004247067.1|1.5e-292|membrane protein of ER body 2 [Solanum lycopersicum]
Solyc09g011580.2	89.923	132.19	0.502217	0.000120709	XP_004246382.1|1.5e-123|probable glutathione S-transferase [Solanum lycopersicum]
Solyc05g051660.1	26.563	39.146	0.502049	0.0183417	NP_001316336.1|2.6e-190|acylsugar acylhydrolase 1 [Solanum lycopersicum]
Solyc08g006310.2	3.323	4.89	0.500843	0.0344052	XP_004244483.1|0.0e+00|probable xyloglucan glycosyltransferase 5 [Solanum lycopersicum]
Solyc06g075510.2	8.256	12.12	0.500771	0.00264277	NP_001233891.2|1.3e-275|APETALA2-like protein AP2e [Solanum lycopersicum]
Solyc03g080020.2	4.086	6.013	0.500762	0.0284306	XP_004235041.1|3.5e-57|UNC93-like protein 1 [Solanum lycopersicum]
Solyc07g048050.1	10.906	16.1	0.50062	0.0236906	XP_004243539.1|8.6e-236|cytochrome b561 and DOMON domain-containing protein At2g04850 [Solanum lycopersicum]
Solyc01g094610.2	8.726	12.84	0.500365	0.010129	XP_004229911.1|2.1e-274|rop guanine nucleotide exchange factor 3 isoform X1 [Solanum lycopersicum]
Solyc03g007760.2	55.956	81.553	0.500062	4.35925e-05	XP_004234206.1|0.0e+00|uncharacterized protein LOC101260609 [Solanum lycopersicum]
Solyc07g049660.2	22.253	32.56	0.500027	0.00262488	XP_004243496.2|3.8e-284|benzyl alcohol O-benzoyltransferase [Solanum lycopersicum]
Solyc03g121070.2	54.91	80.06	0.499742	4.5054e-08	NP_001233957.1|1.0e-283|hexokinase [Solanum lycopersicum]
Solyc06g034110.2	38.973	57.106	0.499595	3.62597e-05	NP_001234071.2|1.3e-147|acid phosphatase 1 precursor [Solanum lycopersicum]
Solyc04g071610.2	205.166	301.136	0.498834	0.000651717	NP_001234137.1|6.4e-61|abscisic stress-ripening protein 1 [Solanum lycopersicum]
Solyc05g006420.2	44.99	65.866	0.498372	0.00268733	XP_015076860.1|4.2e-135|two-component response regulator ARR5-like [Solanum pennellii]
Solyc07g055350.2	31.396	45.866	0.498285	0.000291856	XP_006348901.1|5.0e-287|PREDICTED: cytochrome P450 CYP72A219-like isoform X1 [Solanum tuberosum]
Solyc10g079200.1	17.81	26.17	0.497775	0.00679636	NP_001307555.1|2.6e-165|mitochondrial carnitine/acylcarnitine carrier-like protein [Solanum lycopersicum]
Solyc01g014840.2	8.233	12.33	0.497127	9.4515e-05	XP_004228809.1|0.0e+00|TMV resistance protein N-like [Solanum lycopersicum]
Solyc03g093330.2	5.92	8.633	0.496996	0.00304565	XP_009768910.1|0.0e+00|PREDICTED: leucine-rich repeat receptor-like protein kinase TDR [Nicotiana sylvestris]
Solyc09g014240.2	50.473	73.346	0.496591	3.06344e-07	XP_004246339.1|0.0e+00|laccase-4 [Solanum lycopersicum]
Solyc12g056860.1	38.803	56.5	0.496271	1.56963e-05	XP_004252551.1|1.7e-195|transcription factor TGA1 [Solanum lycopersicum]
Solyc01g079150.2	6.956	10.166	0.496236	0.0102165	XP_015059242.1|0.0e+00|boron transporter 1 isoform X2 [Solanum pennellii]
Solyc00g006800.2	331.95	482.153	0.495779	1.90046e-11	NP_001234354.2|4.6e-248|transaldolase [Solanum lycopersicum]
Solyc12g010350.1	173.64	255.106	0.495156	1.05244e-05	OIS97171.1|4.1e-26|60s ribosomal protein l39-3, partial [Nicotiana attenuata]
Solyc06g065820.2	13.51	19.876	0.495126	0.0423094	NP_001234848.1|9.3e-114|ethylene response factor H.1 [Solanum lycopersicum]
Solyc05g056390.2	117.186	172.413	0.494176	0.000290493	NP_001333033.1|1.8e-47|chaperonin [Solanum lycopersicum]
Solyc06g009280.1	9.83	14.316	0.49403	0.000909607	XP_015168025.1|0.0e+00|PREDICTED: ABC transporter B family member 11-like isoform X1 [Solanum tuberosum]
Solyc03g121930.2	8.54	12.51	0.49357	0.0286028	XP_010318491.1|9.3e-166|PHD finger protein ALFIN-LIKE 4 [Solanum lycopersicum]
Solyc02g093210.2	9.966	14.516	0.491194	0.00791077	XP_015066339.1|1.7e-259|PI-PLC X domain-containing protein At5g67130 [Solanum pennellii]
Solyc03g031450.2	15.336	22.426	0.490959	0.0137081	XP_004234582.1|1.0e-195|transcription factor bHLH112-like [Solanum lycopersicum]
Solyc07g054880.2	20.33	29.723	0.490375	0.00849561	NP_001307243.1|4.7e-147|methylketone synthase Ie [Solanum lycopersicum]
Solyc01g094470.2	53.313	78.236	0.48935	0.00704169	NP_001308769.1|1.3e-37|uncharacterized protein LOC101244033 [Solanum lycopersicum]
Solyc09g072590.2	149.876	218.02	0.488889	5.2584e-07	XP_004247519.1|1.1e-78|actin-depolymerizing factor [Solanum lycopersicum]
Solyc11g066590.1	17.436	25.303	0.488485	0.00168364	XP_004250994.1|1.9e-301|lysosomal Pro-X carboxypeptidase [Solanum lycopersicum]
Solyc03g078620.1	80.22	117.113	0.487926	2.32346e-05	XP_004235060.1|2.2e-110|uncharacterized protein LOC101261593 [Solanum lycopersicum]
Solyc08g080320.2	19.273	28.026	0.486418	0.00323341	XP_004245651.1|2.8e-155|BAG family molecular chaperone regulator 3-like [Solanum lycopersicum]
Solyc02g091800.2	7.133	10.433	0.485822	0.0453584	XP_004233616.1|3.5e-196|transcription factor bHLH25 [Solanum lycopersicum]
Solyc08g082160.2	53.413	78.01	0.4852	0.00140668	PHT57883.1|2.8e-41|hypothetical protein CQW23_00246 [Capsicum baccatum]
Solyc08g083380.2	73.213	106.72	0.484918	0.000197674	XP_004245438.1|5.1e-43|mitochondrial import inner membrane translocase subunit Tim13 [Solanum lycopersicum]
Solyc11g007740.1	13.2	19.27	0.484036	0.0268528	XP_004250014.1|1.9e-149|uncharacterized protein LOC101257624 isoform X1 [Solanum lycopersicum]
Solyc03g093390.2	149.75	215.69	0.483464	0.000503999	NP_001233766.1|1.6e-167|beta expansin precursor [Solanum lycopersicum]
Solyc09g075890.2	100.713	146.193	0.483461	0.00216317	XP_004247365.1|2.6e-140|uncharacterized protein LOC101255829 [Solanum lycopersicum]
Solyc01g080900.2	7.136	10.343	0.483265	0.0182994	XP_004229509.1|1.4e-295|ent-kaurenoic acid oxidase 2-like isoform X1 [Solanum lycopersicum]
Solyc05g050970.2	164.783	236.903	0.483145	1.60579e-11	XP_006345515.1|0.0e+00|PREDICTED: transketolase, chloroplastic-like [Solanum tuberosum]
Solyc07g064740.2	10.03	14.466	0.482296	0.00046088	XP_004244104.1|0.0e+00|rab3 GTPase-activating protein catalytic subunit [Solanum lycopersicum]
Solyc02g070770.2	3.69	4.266	0.481831	0.0171389	XP_004233107.1|1.5e-158|uncharacterized protein At2g34460, chloroplastic [Solanum lycopersicum]
Solyc04g074100.2	49.946	72.2	0.481815	0.000316542	XP_004237906.1|4.0e-83|uncharacterized protein At4g22758 [Solanum lycopersicum]
Solyc02g064610.2	3.37	4.893	0.481741	0.01027	XP_004233952.1|1.2e-150|uncharacterized protein LOC101266905 isoform X1 [Solanum lycopersicum]
Solyc03g118740.2	9.446	13.63	0.481714	0.00220406	NP_001234163.1|0.0e+00|auxin efflux carrier component 1 [Solanum lycopersicum]
Solyc01g101060.2	1103.7	1592.84	0.480618	0.000246758	NP_001234425.1|1.0e-231|S-adenosylmethionine synthase 1 [Solanum lycopersicum]
Solyc02g069120.2	7.71	11.166	0.480436	0.0322045	XP_004233218.1|3.4e-292|zinc finger protein ZPR1-like [Solanum lycopersicum]
Solyc06g051350.2	8.94	12.956	0.480206	0.012394	XP_004240931.1|1.7e-262|protein ESKIMO 1-like [Solanum lycopersicum]
Solyc06g006000.2	77.693	112.78	0.479255	0.0136135	XP_004240397.1|1.4e-96|uncharacterized protein LOC101264428 [Solanum lycopersicum]
Solyc02g077710.1	215.853	311.146	0.478693	0.00019832	XP_004232917.1|7.9e-206|homeobox protein 2 [Solanum lycopersicum]
Solyc09g010210.2	30.846	44.38	0.478648	0.00156266	XP_015088152.1|1.3e-288|endoglucanase 8-like [Solanum pennellii]
Solyc06g007220.2	213.826	313.68	0.478615	0.000217066
Solyc02g091140.2	11.33	16.353	0.478543	0.00556697	XP_004232014.1|4.3e-213|probable S-adenosylmethionine-dependent methyltransferase At5g38780 [Solanum lycopersicum]
Solyc01g087540.2	45.09	64.98	0.478396	0.0025017	XP_004229647.2|2.3e-211|uncharacterized protein LOC101251618 [Solanum lycopersicum]
Solyc12g098490.1	34.903	50.23	0.47829	5.06366e-05	XP_004252986.1|2.1e-278|serine hydroxymethyltransferase 4 [Solanum lycopersicum]
Solyc10g079600.1	47.466	68.956	0.475417	0.026218	XP_004249238.1|2.8e-122|two-component response regulator ARR9 [Solanum lycopersicum]
Solyc04g072800.2	12.21	17.59	0.475357	0.00921818	XP_004237885.1|1.5e-145|uncharacterized protein LOC101247124 [Solanum lycopersicum]
Solyc04g079520.2	55.44	79.206	0.474943	2.02977e-06	XP_004238191.1|0.0e+00|protein NRT1/ PTR FAMILY 4.5 [Solanum lycopersicum]
BGI_novel_G000015	12.01	17.233	0.474462	0.000329194
Solyc09g097900.2	15.493	22.376	0.474446	0.0138782	XP_004248020.1|2.9e-117|ras-related protein RABA5c [Solanum lycopersicum]
Solyc06g074180.1	37.003	53.053	0.473686	7.52226e-05	XP_004241332.1|1.1e-293|cytochrome P450 89A2-like [Solanum lycopersicum]
Solyc03g006060.2	15.676	22.593	0.473593	0.0054689	XP_004234082.1|3.6e-117|uncharacterized protein LOC101249331 [Solanum lycopersicum]
Solyc08g008590.2	92.393	133.296	0.472923	0.000512698	XP_021805473.1|7.1e-65|polyubiquitin 11-like [Prunus avium]
BGI_novel_G000232	138.283	198.326	0.472794	2.71469e-05
Solyc05g053070.2	374.913	545.506	0.472478	1.82805e-06	XP_004239905.1|1.9e-46|dehydrin HIRD11 [Solanum lycopersicum]
Solyc01g065700.2	46.553	67.206	0.472378	0.000231722	XP_004229276.1|7.0e-208|probable protein phosphatase 2C 34 [Solanum lycopersicum]
Solyc07g064050.2	9.006	13.033	0.471696	0.00819667	PHT43893.1|3.3e-304|putative galacturonosyltransferase 12 [Capsicum baccatum]
Solyc09g092390.2	302.793	432.363	0.47134	8.01365e-12	XP_004247887.1|1.4e-282|adenosylhomocysteinase [Solanum lycopersicum]
Solyc02g087640.2	7.163	10.283	0.471203	0.0099894	XP_004232244.1|1.2e-281|protein arginine methyltransferase NDUFAF7 homolog, mitochondrial [Solanum lycopersicum]
Solyc01g015080.2	320.546	460.27	0.471083	0.000731543	XP_004228346.1|2.5e-187|peroxidase N [Solanum lycopersicum]
Solyc11g008080.1	15.53	22.413	0.469795	0.0238169	XP_004250036.1|2.2e-164|uncharacterized protein LOC101263962 [Solanum lycopersicum]
Solyc12g094460.1	133.7	191.076	0.469505	6.10817e-05	XP_004253133.1|0.0e+00|L-ascorbate oxidase homolog [Solanum lycopersicum]
Solyc05g051000.2	97.813	140.27	0.468034	2.10552e-05	XP_004240045.1|5.0e-80|40S ribosomal protein S13 [Solanum lycopersicum]
Solyc03g062700.2	4.896	7.033	0.467846	0.0345826	XP_004234804.1|0.0e+00|protein SINE1 [Solanum lycopersicum]
Solyc10g008900.2	113.123	162.546	0.467734	2.94938e-05	XP_004248124.1|2.5e-105|dirigent protein 22 [Solanum lycopersicum]
Solyc09g083090.2	20.75	29.59	0.467335	0.00364654	XP_004247628.1|1.0e-191|CBL-interacting serine/threonine-protein kinase 7 [Solanum lycopersicum]
Solyc02g094050.2	17.576	25.343	0.466597	0.0197071	XP_004231787.1|1.5e-90|mavicyanin [Solanum lycopersicum]
Solyc09g008380.2	20.66	29.516	0.466351	0.00365151	XP_019152397.1|2.0e-218|PREDICTED: probable pectate lyase 12 isoform X1 [Ipomoea nil]
Solyc10g008880.2	10.496	14.98	0.466316	0.00243226	XP_004248126.1|4.1e-286|transcription factor VOZ1 [Solanum lycopersicum]
Solyc03g115710.1	9.42	13.54	0.465476	0.0304632	XP_025886103.1|0.0e+00|probable receptor-like protein kinase At5g61350 [Solanum lycopersicum]
Solyc06g005560.2	49.016	70.026	0.465067	0.00288741	NP_001234881.1|5.0e-153|expansin9 precursor [Solanum lycopersicum]
Solyc00g247300.2	56.243	80.28	0.464597	0.00647431	XP_004253509.1|2.6e-286|cytochrome P450 CYP736A12 [Solanum lycopersicum]
Solyc06g074500.1	20.913	30.01	0.464311	0.0099268	XP_004241308.1|2.0e-176|uncharacterized protein LOC101248489 [Solanum lycopersicum]
Solyc04g081220.2	35.79	51.293	0.463978	0.00372502	XP_004238339.1|1.7e-67|uncharacterized protein LOC101257366 [Solanum lycopersicum]
Solyc12g009400.1	41.213	58.52	0.463934	3.84336e-05	XP_004251713.1|4.3e-257|pyruvate dehydrogenase E1 component subunit alpha-3, chloroplastic [Solanum lycopersicum]
Solyc03g119660.1	33.62	48.026	0.463907	0.000284277	XP_004236417.1|1.3e-255|pollen-specific leucine-rich repeat extensin-like protein 2 [Solanum lycopersicum]
Solyc09g089680.2	84.18	120.3	0.463348	0.00147802	XP_004247710.1|1.2e-217|1-aminocyclopropane-1-carboxylate oxidase homolog [Solanum lycopersicum]
Solyc03g083290.2	21.93	31.573	0.462888	0.00693946	XP_004234964.1|3.1e-75|40S ribosomal protein S12 [Solanum lycopersicum]
Solyc05g055320.2	238.646	340.936	0.462468	0.000332144	XP_004239722.1|1.0e-191|peroxidase 5-like [Solanum lycopersicum]
Solyc02g080390.2	3.763	5.343	0.462126	0.00422035	XP_010316598.1|0.0e+00|abnormal spindle-like microcephaly-associated protein homolog isoform X2 [Solanum lycopersicum]
Solyc02g062530.2	41.076	58.763	0.461728	0.00162489	XP_004233536.1|1.7e-73|uncharacterized protein LOC101245723 [Solanum lycopersicum]
Solyc01g079570.2	9.273	13.19	0.460628	0.00885084	NP_001266107.1|0.0e+00|alpha-L-arabinofuranosidase/beta-xylosidase precursor [Solanum lycopersicum]
Solyc02g088100.2	11.143	15.913	0.460528	0.0206337	NP_001234085.1|3.2e-142|expansin precursor [Solanum lycopersicum]
Solyc03g005330.1	57.713	82.493	0.460151	0.023748	XP_004234026.1|3.0e-247|CBL-interacting serine/threonine-protein kinase 7 [Solanum lycopersicum]
Solyc02g069600.2	9.883	14.036	0.458889	0.0105785	XP_004233188.1|4.0e-276|beta-amyrin 28-monooxygenase-like [Solanum lycopersicum]
Solyc06g068910.2	5.08	7.226	0.458043	0.0283042	XP_004241646.1|0.0e+00|probable inactive receptor kinase At1g48480 [Solanum lycopersicum]
Solyc03g117730.2	13.566	19.3	0.457578	0.00411285	XP_010318693.1|1.8e-239|tubby-like protein 8 [Solanum lycopersicum]
Solyc10g080610.1	148.993	212.743	0.456765	0.0139647	XP_004249296.1|3.8e-208|F-box/kelch-repeat protein At1g15670 [Solanum lycopersicum]
Solyc09g065590.2	5.46	7.766	0.454622	0.033441	XP_004247195.1|5.7e-276|VAN3-binding protein [Solanum lycopersicum]
Solyc07g065980.2	13.72	19.416	0.453824	0.0100317	AAN32954.1|0.0e+00|alkaline alpha-galactosidase seed imbibition protein [Solanum lycopersicum]
Solyc08g082830.2	6.906	9.766	0.453685	0.00561346	PHU27957.1|0.0e+00|Glutamine-dependent NAD(+) synthetase [Capsicum chinense]
Solyc11g073200.1	11.98	17.083	0.453639	0.0331841	XP_004251312.1|3.1e-205|glutelin type-D 1 [Solanum lycopersicum]
Solyc01g087880.2	20.573	29.426	0.453567	0.0210598	XP_004229668.1|5.7e-45|uncharacterized protein LOC101258782 [Solanum lycopersicum]
Solyc09g025230.2	5.656	7.843	0.452871	0.0484003	XP_004246944.1|1.2e-266|patellin-4-like [Solanum lycopersicum]
Solyc02g086840.2	5.24	7.423	0.452758	0.0123731	XP_009614635.1|0.0e+00|PREDICTED: tetratricopeptide repeat protein 28-like [Nicotiana tomentosiformis]
Solyc06g069670.2	1.493	2.003	0.452648	0.0400123	XP_015078547.1|1.4e-301|formin-like protein 20 [Solanum pennellii]
Solyc09g018790.2	70.87	100.176	0.452578	8.88812e-06	NP_001233832.2|1.4e-158|succinic semialdehyde reductase isofom1 [Solanum lycopersicum]
Solyc11g066350.1	11.843	16.876	0.452028	0.0483258	XP_004250979.1|1.9e-163|SHUGOSHIN 2 isoform X1 [Solanum lycopersicum]
Solyc02g094300.2	5.2	8.19	0.452009	0.0117285	XP_004231764.1|1.4e-194|ACT domain-containing protein ACR6 [Solanum lycopersicum]
Solyc04g008260.2	13.276	18.846	0.451832	0.0140996	XP_015071625.1|9.9e-192|purple acid phosphatase 4-like [Solanum pennellii]
Solyc04g007400.2	34.226	48.576	0.451638	0.0150997	XP_004236988.1|4.8e-147|tropinone reductase 2 [Solanum lycopersicum]
Solyc10g079620.1	34.676	49.166	0.451313	0.000987954	NP_001334518.1|2.9e-172|haloacid dehalogenase [Solanum lycopersicum]
Solyc08g041700.1	43.643	61.676	0.450862	2.27086e-05	XP_004244936.1|9.5e-243|uncharacterized protein LOC101259656 [Solanum lycopersicum]
Solyc06g074850.2	23.553	33.236	0.45081	0.000922398	XP_004241292.1|5.7e-297|serine carboxypeptidase-like [Solanum lycopersicum]
Solyc09g083280.2	30.63	43.31	0.449865	0.0012857	NP_001266037.1|2.0e-109|IAA1 [Solanum lycopersicum]
Solyc08g080630.2	119.863	171.376	0.449072	0.0358472	NP_001234615.1|1.3e-59|ethylene-responsive proteinase inhibitor 1 precursor [Solanum lycopersicum]
Solyc09g011420.2	114.85	162.596	0.448996	0.000901904	XP_004246393.1|7.1e-64|NHP2-like protein 1 [Solanum lycopersicum]
Solyc10g007110.2	40.886	57.663	0.448862	8.83259e-05	XP_016452180.1|1.2e-218|PREDICTED: probable aminotransferase TAT2 [Nicotiana tabacum]
Solyc00g063110.2	22.516	32.043	0.448236	0.0149762	PHT86701.1|1.9e-57|hypothetical protein T459_08807 [Capsicum annuum]
Solyc08g016670.2	27.993	39.59	0.447951	0.00678748	XP_004244806.1|1.4e-120|calcyclin-binding protein [Solanum lycopersicum]
Solyc04g079310.2	53.016	74.613	0.447786	0.000805557	XP_004238180.1|1.8e-274|polyadenylate-binding protein RBP47 [Solanum lycopersicum]
Solyc01g111170.2	1106.9	1559.7	0.447749	1.85841e-06	NP_001234488.1|2.9e-96|peptidyl-prolyl cis-trans isomerase [Solanum lycopersicum]
Solyc01g009370.1	48.646	68.673	0.445972	0.00310292	XP_004228867.1|2.6e-298|cytochrome P450 98A2-like [Solanum lycopersicum]
Solyc06g074070.2	3.373	4.753	0.445594	0.0269921	XP_004241337.1|0.0e+00|receptor-like kinase TMK3 [Solanum lycopersicum]
Solyc07g043640.2	6.7	9.466	0.445239	0.0318078	XP_015081149.1|0.0e+00|probable acyl-activating enzyme 1, peroxisomal [Solanum pennellii]
Solyc08g077990.2	3.436	4.843	0.445116	0.025908	XP_010325517.1|0.0e+00|probable serine/threonine-protein kinase pkgA [Solanum lycopersicum]
Solyc05g056290.2	34.65	48.74	0.445114	0.00123276	NP_001234322.1|2.6e-158|biotin carboxylase carrier protein [Solanum lycopersicum]
Solyc00g049520.2	158.123	224.62	0.443291	0.000434472
Solyc09g075360.2	37.676	52.746	0.441965	8.38594e-05	XP_019247497.1|1.8e-280|PREDICTED: endoglucanase 17 [Nicotiana attenuata]
Solyc01g094290.2	24.743	34.586	0.441905	5.13591e-05	XP_004229880.1|0.0e+00|K(+) efflux antiporter 2, chloroplastic [Solanum lycopersicum]
Solyc02g064800.2	7.28	10.283	0.441823	0.00652328	XP_004233447.1|0.0e+00|uncharacterized protein LOC101268835 isoform X1 [Solanum lycopersicum]
Solyc02g093390.2	12.536	17.623	0.441192	0.0138057	XP_004231845.1|9.6e-158|ribosomal RNA-processing protein 8 [Solanum lycopersicum]
Solyc01g094380.2	7.766	10.953	0.440709	0.042711	XP_010326254.1|0.0e+00|O-glucosyltransferase rumi homolog [Solanum lycopersicum]
Solyc12g044420.1	23.556	33.363	0.440614	0.0200752	XP_004252355.1|2.2e-121|uncharacterized protein LOC101247111 [Solanum lycopersicum]
Solyc03g115200.2	17.553	24.27	0.440547	0.0382058	NP_001333365.1|1.5e-105|beta-1,3-glucanase family protein precursor [Solanum lycopersicum]
Solyc02g068120.2	12.75	17.946	0.4402	0.0199007	XP_004233294.1|2.3e-175|B2 protein [Solanum lycopersicum]
Solyc08g068420.2	7.376	10.353	0.439175	0.0162641	XP_004245272.1|0.0e+00|L-gulonolactone oxidase 3 [Solanum lycopersicum]
Solyc01g005440.2	45.593	63.71	0.439115	0.00195786	NP_001234373.1|2.2e-169|jasmonate ZIM-domain protein 3 [Solanum lycopersicum]
Solyc02g078570.2	21.156	29.663	0.438992	0.00996115	XP_004232842.1|1.4e-179|uncharacterized protein LOC101265883 [Solanum lycopersicum]
Solyc03g096360.2	320.656	449.143	0.438909	0.000145605	PHT52664.1|4.7e-56|60S ribosomal protein L35a-3 [Capsicum baccatum]
Solyc08g080170.2	29.773	41.613	0.43888	0.000686172	XP_009800463.1|9.8e-260|PREDICTED: hydroxymethylglutaryl-CoA synthase-like [Nicotiana sylvestris]
Solyc11g032100.1	18.87	26.753	0.438634	0.0484034	NP_001233764.2|6.2e-110|TAGL12 transcription factor isoform 1 [Solanum lycopersicum]
Solyc08g077710.2	243.493	342.92	0.438463	0.000107326	XP_011085665.1|2.9e-39|60S ribosomal protein L37a [Sesamum indicum]
Solyc06g083500.2	10.366	14.583	0.438414	0.0272741	XP_010323084.1|1.5e-254|probable serine/threonine-protein kinase PBL25 isoform X1 [Solanum lycopersicum]
Solyc08g005060.2	15.75	22.203	0.438116	0.0253508	XP_004244393.1|5.2e-97|DNA repair RAD52-like protein 1, mitochondrial [Solanum lycopersicum]
Solyc03g080180.2	141.103	197.18	0.437259	3.07068e-05	Q9FQY8.2|1.8e-187|RecName: Full=Caffeic acid 3-O-methyltransferase; Short=CAOMT; Short=COMT; AltName: Full=S-adenosysl-L-methionine:caffeic acid 3-O-methyltransferase
Solyc06g076470.2	23.276	32.91	0.43598	0.0347726	XP_004241204.1|9.8e-82|uncharacterized protein LOC101267414 isoform X1 [Solanum lycopersicum]
Solyc05g050410.2	38.94	53.53	0.435932	2.51518e-05	XP_025887010.1|1.2e-38|putative late blight resistance protein homolog R1A-3 isoform X1 [Solanum lycopersicum]
Solyc10g078590.1	43.193	60.663	0.435147	0.00299055	XP_004249151.1|9.3e-140|uncharacterized protein LOC101247272 [Solanum lycopersicum]
Solyc03g046340.2	4.726	6.623	0.435126	0.0483258	XP_004234697.1|0.0e+00|probable inactive ATP-dependent zinc metalloprotease FTSHI 3, chloroplastic [Solanum lycopersicum]
Solyc05g056480.2	11.573	16.19	0.434743	0.00668775	XP_004239633.1|3.5e-274|2-oxoisovalerate dehydrogenase subunit alpha 2, mitochondrial [Solanum lycopersicum]
Solyc04g054260.2	10.076	14.103	0.434675	0.0152331	XP_004237435.1|1.8e-292|cytochrome P450 CYP736A12 [Solanum lycopersicum]
Solyc07g066300.2	3.67	5.123	0.434563	0.0477197	XP_004244325.1|0.0e+00|uncharacterized protein LOC101257787 [Solanum lycopersicum]
Solyc04g080010.2	42.043	58.6	0.434374	0.000201338	XP_004238231.1|2.3e-276|hydroquinone glucosyltransferase [Solanum lycopersicum]
Solyc07g062400.2	76.88	107.62	0.434256	0.000416111	NP_001307152.1|1.7e-69|multiprotein bridging factor 1c [Solanum lycopersicum]
Solyc02g086430.2	35.456	49.57	0.434057	0.00121635	XP_004233706.1|6.8e-142|zinc finger CCCH domain-containing protein 14 [Solanum lycopersicum]
Solyc10g078550.1	258.023	359.476	0.433265	5.14571e-06	XP_009800300.1|1.1e-225|PREDICTED: glutamate dehydrogenase B-like [Nicotiana sylvestris]
Solyc08g082250.2	52.84	73.586	0.432744	0.0112328	AHB32109.1|1.2e-308|endoglucanase 6-like protein [Camellia sinensis]
Solyc10g081510.1	616.47	855.853	0.432548	1.89339e-07	XP_019232885.1|0.0e+00|PREDICTED: 5-methyltetrahydropteroyltriglutamate--homocysteine methyltransferase-like [Nicotiana attenuata]
Solyc12g015860.1	61.193	85.43	0.432172	0.000881929	AOX15288.1|3.1e-178|farnesyl diphosphate synthase 2 [Withania somnifera]
Solyc07g062310.2	16.053	22.08	0.431997	0.00396545	XP_004244284.1|5.8e-229|protein GRAVITROPIC IN THE LIGHT 1 [Solanum lycopersicum]
Solyc10g086330.1	127.18	178.46	0.431075	0.000297208	XP_004249660.1|4.7e-81|60S ribosomal protein L23a-like [Solanum lycopersicum]
Solyc04g077490.2	14.716	20.456	0.430464	0.000635231	NP_001287930.1|0.0e+00|AP2-like ethylene-responsive transcription factor ANT-like [Solanum lycopersicum]
Solyc03g005760.1	32.636	45.63	0.430419	0.00698273	XP_010317413.1|1.2e-153|chlorophyll a-b binding protein 3A, chloroplastic-like [Solanum lycopersicum]
Solyc06g073970.1	46.903	65.32	0.429893	0.000493345	XP_004241348.1|9.4e-210|uncharacterized protein LOC101260237 [Solanum lycopersicum]
Solyc01g097450.2	54.893	76.796	0.429591	0.00358888	XP_004230101.1|1.5e-95|PITH domain-containing protein At3g04780 [Solanum lycopersicum]
Solyc06g062380.2	255.573	355.34	0.429489	7.27291e-07	XP_010322861.1|2.2e-151|acid phosphatase 1 [Solanum lycopersicum]
Solyc01g066480.2	26.783	37.286	0.428756	0.000519708	XP_004229257.1|1.1e-142|probable acylpyruvase FAHD1, mitochondrial [Solanum lycopersicum]
Solyc10g080190.1	46.386	64.56	0.428506	0.00365151	XP_004249268.1|7.1e-38|uncharacterized protein LOC101257225 [Solanum lycopersicum]
Solyc05g005700.2	7.57	10.55	0.427305	0.0315947	XP_006355977.1|1.1e-303|PREDICTED: aldehyde dehydrogenase family 2 member B7, mitochondrial-like [Solanum tuberosum]
Solyc11g064790.1	46.573	63.763	0.426548	1.32584e-05	XP_004250889.1|2.0e-193|signal peptide peptidase-like [Solanum lycopersicum]
Solyc12g019060.1	30.026	39.503	0.424668	2.00248e-06	XP_004251987.1|0.0e+00|ankyrin repeat-containing protein At5g02620-like [Solanum lycopersicum]
Solyc03g123580.2	217.25	304.743	0.424293	0.00347673	XP_004235531.1|3.8e-69|uncharacterized protein LOC101247199 [Solanum lycopersicum]
Solyc02g067180.2	149.816	206.85	0.423814	8.76576e-09	NP_001234489.1|3.1e-310|cystathionine gamma synthase [Solanum lycopersicum]
Solyc09g083380.2	303.66	421.593	0.423666	6.49025e-05	XP_004247649.1|8.5e-98|histone H1-like [Solanum lycopersicum]
Solyc09g018170.2	374.53	517.31	0.423099	4.55519e-06	XP_004246271.1|0.0e+00|probable serine/threonine-protein kinase WNK5 [Solanum lycopersicum]
Solyc06g075220.1	26.58	37.07	0.423011	0.0126546	XP_004241271.1|6.3e-136|fasciclin-like arabinogalactan protein 11 [Solanum lycopersicum]
Solyc01g016470.2	75.616	105.42	0.422528	0.00915133	XP_004228342.1|2.2e-55|60S acidic ribosomal protein P1 [Solanum lycopersicum]
Solyc08g006840.2	20.446	28.326	0.42222	0.00746461	XP_004244528.1|1.7e-176|uncharacterized protein LOC101252508 [Solanum lycopersicum]
Solyc07g055290.2	29.396	40.766	0.421793	0.00139436	NP_001233798.2|4.6e-119|Rab11 GTPase [Solanum lycopersicum]
Solyc01g006310.2	41.46	57.39	0.421241	0.00612643	XP_004228694.1|3.4e-188|peroxidase N-like isoform X1 [Solanum lycopersicum]
Solyc09g075370.2	21.12	29.286	0.420891	0.0042895	XP_004247399.1|4.5e-130|39S ribosomal protein L46, mitochondrial [Solanum lycopersicum]
Solyc11g005620.1	18.94	26.28	0.42078	0.0107583	NP_001306260.1|8.0e-190|acetylglutamate kinase [Solanum lycopersicum]
Solyc05g055250.2	76.256	106.236	0.42044	0.000393394	XP_010321349.1|2.0e-39|uncharacterized protein At2g27730, mitochondrial isoform X2 [Solanum lycopersicum]
Solyc04g082070.2	9.243	12.81	0.420104	0.0363941	XP_004238400.1|3.4e-143|tRNA pseudouridine synthase A [Solanum lycopersicum]
Solyc07g047950.1	25.803	35.706	0.419909	0.0182382	XP_019250098.1|1.4e-268|PREDICTED: scarecrow-like transcription factor PAT1 [Nicotiana attenuata]
Solyc10g085550.1	34.596	47.856	0.419639	0.00592374	NP_001332774.1|1.6e-254|enolase [Solanum lycopersicum]
Solyc03g031460.1	19.07	26.42	0.419247	0.0114395	XP_010317656.1|1.3e-214|pentatricopeptide repeat-containing protein At1g55890, mitochondrial [Solanum lycopersicum]
Solyc11g065190.1	51.543	71.92	0.418468	0.0162012	XP_004250911.1|1.4e-100|ubiquitin-conjugating enzyme E2 20 [Solanum lycopersicum]
BGI_novel_G000157	13.64	18.86	0.418086	0.0472445
Solyc04g008820.2	25.17	34.87	0.416075	0.0305572	XP_004236870.1|1.7e-117|high mobility group B protein 7 [Solanum lycopersicum]
Solyc10g044510.1	8.313	11.493	0.416064	0.0376925	XP_004248847.1|0.0e+00|MLO-like protein 4 isoform X1 [Solanum lycopersicum]
Solyc06g082140.2	317.54	441.996	0.415634	0.000252091	PON86573.1|5.0e-07|Ribosomal protein [Trema orientale]
Solyc04g081810.2	39.893	54.93	0.41549	0.00463418	XP_004238378.1|0.0e+00|CO(2)-response secreted protease [Solanum lycopersicum]
Solyc10g084320.1	16.453	22.633	0.415284	0.0205033	XP_004249504.1|0.0e+00|subtilisin-like protease SBT1.9 [Solanum lycopersicum]
Solyc06g075800.1	149.85	209.716	0.415199	0.0114926	XP_004241245.1|6.8e-74|probable histone H2B.1 [Solanum lycopersicum]
Solyc01g111400.2	13.793	18.946	0.414656	0.00408564	XP_004231026.1|0.0e+00|subtilisin-like protease SBT1.6 [Solanum lycopersicum]
Solyc06g007210.2	506.263	717.106	0.414272	0.00490801
Solyc03g119610.1	54.08	74.893	0.413994	0.0418263	XP_004235829.1|7.2e-137|uncharacterized protein LOC101261213 [Solanum lycopersicum]
Solyc09g075300.2	20.25	27.923	0.41359	0.00846588	XP_004247402.1|3.8e-188|uncharacterized protein LOC101267266 [Solanum lycopersicum]
Solyc11g010660.1	13.276	18.216	0.41327	0.000488537	NP_001307150.1|0.0e+00|protein SGT1 [Solanum lycopersicum]
Solyc02g094160.1	35.19	48.58	0.411826	0.0393262	XP_004231780.1|5.3e-191|ribonucleoside-diphosphate reductase small chain [Solanum lycopersicum]
Solyc03g115690.1	50.78	69.91	0.411401	0.00222724	XP_004236481.1|4.1e-183|uncharacterized protein LOC101262301 [Solanum lycopersicum]
Solyc06g068520.2	48.14	66.493	0.410932	0.00904595	NP_001234375.1|1.4e-79|hydroxyproline-rich systemin precursor [Solanum lycopersicum]
Solyc05g012040.2	9.593	13.013	0.410785	0.0042228	XP_004239031.1|0.0e+00|squamosa promoter-binding-like protein 6 [Solanum lycopersicum]
Solyc12g062290.1	9.883	13.603	0.409226	0.0409265	XP_004252664.1|4.4e-290|protease Do-like 9 [Solanum lycopersicum]
Solyc05g055290.2	29.873	40.99	0.408608	0.00177831	XP_004239724.1|7.7e-208|uncharacterized protein LOC101244873 [Solanum lycopersicum]
Solyc03g006580.2	34.81	47.823	0.408583	0.00404125	XP_004234130.1|2.4e-130|protein GID8 homolog [Solanum lycopersicum]
Solyc01g091880.2	19.143	26.24	0.408352	0.00402328	XP_004229860.1|2.5e-200|ATPase ARSA2 [Solanum lycopersicum]
Solyc02g070810.2	5.176	7.063	0.408226	0.00116196	XP_004233869.1|0.0e+00|nuclear pore complex protein GP210 [Solanum lycopersicum]
Solyc01g095070.2	65.563	89.916	0.40786	0.000116471	XP_004229951.1|2.3e-121|heavy metal-associated isoprenylated plant protein 39 [Solanum lycopersicum]
Solyc01g097720.1	260.026	358.316	0.407527	0.0215093	XP_025884746.1|4.4e-231|extensin-3-like [Solanum lycopersicum]
Solyc03g097830.2	5.833	7.86	0.407495	0.0413	XP_004235296.1|6.5e-271|uncharacterized protein LOC101251959 isoform X1 [Solanum lycopersicum]
Solyc03g111010.2	126.016	172.606	0.407459	2.27776e-05	NP_001234803.2|4.9e-190|glyceraldehyde 3-phosphate dehydrogenase [Solanum lycopersicum]
Solyc08g081530.2	123.72	168.89	0.407281	6.68385e-08	NP_001234013.2|4.8e-284|monodehydroascorbate reductase [Solanum lycopersicum]
Solyc08g007790.2	12.03	16.463	0.406832	0.0141413	XP_009614165.1|5.9e-260|PREDICTED: hydroxymethylglutaryl-CoA synthase-like [Nicotiana tomentosiformis]
Solyc08g075690.2	535.193	741.663	0.40506	8.83756e-05	XP_004245991.1|7.3e-44|acyl-CoA-binding protein [Solanum lycopersicum]
Solyc04g055200.2	28.223	40.06	0.404431	0.00490801	XP_006355345.1|7.5e-239|PREDICTED: asparagine synthetase [glutamine-hydrolyzing] 2 [Solanum tuberosum]
Solyc02g094490.2	45.35	62.276	0.404251	0.00299102	XP_004231747.1|6.9e-101|rRNA-processing protein CGR1 [Solanum lycopersicum]
Solyc11g065070.1	15.686	21.516	0.404162	0.0380238	XP_004250903.1|1.8e-244|hydroxymethylglutaryl-CoA lyase, mitochondrial [Solanum lycopersicum]
Solyc09g008080.2	56.75	78.073	0.403745	0.0166249	XP_004246639.1|9.3e-87|uncharacterized protein LOC101265954 [Solanum lycopersicum]
Solyc03g120780.2	345.66	476.133	0.403719	0.00101655	XP_004235660.1|3.4e-49|60S ribosomal protein L37-3 [Solanum lycopersicum]
Solyc03g112100.2	658.096	901.05	0.403591	0.00166029	XP_010319027.1|1.3e-111|high-affinity nitrate transporter 3.2 [Solanum lycopersicum]
Solyc12g015740.1	26.316	33.843	0.403457	0.00235944	XP_010313948.1|4.0e-123|transmembrane emp24 domain-containing protein p24beta2 [Solanum lycopersicum]
Solyc10g086710.1	76.52	105.846	0.403264	0.00964245	XP_004249680.1|3.6e-98|uncharacterized protein LOC101253546 [Solanum lycopersicum]
Solyc09g075810.2	42.32	57.963	0.403204	0.000997968	XP_004247371.1|9.2e-102|mavicyanin [Solanum lycopersicum]
Solyc12g008700.1	164.906	226.2	0.40223	0.00135942	PIA64528.1|4.1e-28|hypothetical protein AQUCO_00100184v1, partial [Aquilegia coerulea]
Solyc06g048610.2	24.433	33.413	0.401918	0.0287494	XP_004240846.1|4.9e-217|tRNA-aminoacylation cofactor arc1 isoform X2 [Solanum lycopersicum]
Solyc06g053550.2	24.68	33.876	0.401816	0.0238575	XP_004241006.1|5.5e-104|peroxisomal membrane protein PMP22 [Solanum lycopersicum]
Solyc09g007350.2	115.476	159.18	0.401362	0.0207242	PIA38663.1|3.4e-78|hypothetical protein AQUCO_02700115v1, partial [Aquilegia coerulea]
Solyc08g014000.2	80.19	109.066	0.400811	0.00557872	NP_001311581.1|0.0e+00|probable linoleate 9S-lipoxygenase 4 [Capsicum annuum]
Solyc09g010640.2	19.703	26.8	0.400341	0.000473205	XP_004246426.1|8.9e-278|uncharacterized protein LOC101254022 [Solanum lycopersicum]
Solyc06g007930.2	47.613	65.153	0.399967	0.00136976	XP_004240459.1|3.0e-72|cytochrome b5 [Solanum lycopersicum]
Solyc08g075870.2	32.216	43.79	0.399936	0.00103359	XP_004245921.1|0.0e+00|probable methyltransferase PMT21 [Solanum lycopersicum]
Solyc06g073470.2	17.49	23.846	0.39973	0.00791077	XP_004241394.1|2.0e-216|biotin synthase, mitochondrial [Solanum lycopersicum]
Solyc09g060110.2	10.8	14.676	0.398925	0.0180604	XP_004247083.1|0.0e+00|probable LRR receptor-like serine/threonine-protein kinase At5g48740 isoform X1 [Solanum lycopersicum]
Solyc01g080750.2	41.983	57.246	0.398769	0.00241094	XP_004229496.1|2.0e-162|TOG array regulator of axonemal microtubules protein 1 [Solanum lycopersicum]
Solyc04g012120.2	383.913	522.336	0.398533	3.26951e-07	NP_001234107.2|5.2e-139|14-3-3 protein 5 [Solanum lycopersicum]
Solyc10g085220.1	16.173	21.263	0.398317	0.00653123	XP_004249602.1|0.0e+00|heparanase-like protein 3 [Solanum lycopersicum]
Solyc12g019620.1	4.88	6.4	0.398197	0.0322709	XP_015059891.1|0.0e+00|pleiotropic drug resistance protein 1-like [Solanum pennellii]
Solyc07g005110.2	9.843	14.03	0.398031	0.0291843	XP_010323173.1|0.0e+00|putative cysteine-rich receptor-like protein kinase 35 isoform X2 [Solanum lycopersicum]
Solyc05g055280.1	85.166	116.03	0.397907	9.49401e-05	XP_004239725.1|1.2e-50|ferredoxin, root R-B2 [Solanum lycopersicum]
Solyc04g009690.1	6.19	8.433	0.397816	0.0437976	XP_025886236.1|0.0e+00|LOW QUALITY PROTEIN: disease resistance protein RPP13-like [Solanum lycopersicum]
Solyc07g052660.1	267.66	365.676	0.397254	0.000955886	XP_006360596.1|3.8e-134|PREDICTED: uclacyanin-2-like [Solanum tuberosum]
Solyc09g091660.2	49.52	66.973	0.396718	2.71548e-05	XP_009799503.1|0.0e+00|PREDICTED: pleiotropic drug resistance protein 1 [Nicotiana sylvestris]
Solyc11g020890.1	51.543	71.313	0.396195	0.0425331	XP_004250423.1|7.6e-29|40S ribosomal protein S29 [Solanum lycopersicum]
Solyc01g103570.2	9.286	12.613	0.396031	0.00817402	XP_004230454.1|0.0e+00|bromodomain-containing factor 1 [Solanum lycopersicum]
Solyc03g120500.2	28.96	39.373	0.395644	0.00213517	NP_001266034.1|3.7e-157|auxin-responsive protein IAA27 [Solanum lycopersicum]
Solyc07g054190.2	16.68	22.7	0.395351	0.0179977	XP_004243342.1|9.5e-150|riboflavin synthase [Solanum lycopersicum]
Solyc07g043560.2	34.94	47.293	0.39528	0.000672175	XP_004243633.1|0.0e+00|heat shock 70 kDa protein 17 [Solanum lycopersicum]
Solyc01g097600.1	8.233	11.113	0.395144	0.0380238	XP_004230110.2|1.7e-221|multisubstrate pseudouridine synthase 7 isoform X3 [Solanum lycopersicum]
Solyc01g096070.2	36.696	49.58	0.394655	0.000436497	XP_010327130.1|0.0e+00|auxin response factor 18 [Solanum lycopersicum]
Solyc12g005130.1	8.436	11.26	0.393843	0.0240782	XP_006367536.1|4.2e-231|PREDICTED: uncharacterized protein LOC102597542 [Solanum tuberosum]
Solyc11g006470.1	62.476	84.55	0.393756	0.000146591	XP_004249939.1|2.4e-205|uncharacterized protein LOC101259104 [Solanum lycopersicum]
Solyc02g064650.2	11.373	15.466	0.393584	0.028532	XP_004233459.1|6.2e-183|adenylyl-sulfate kinase 3 [Solanum lycopersicum]
Solyc09g098180.2	54.926	74.553	0.393113	0.000331026	XP_004248000.1|1.7e-194|pirin-like protein [Solanum lycopersicum]
Solyc08g014080.2	22.626	30.78	0.392949	0.0152604	XP_004244754.1|3.5e-151|uncharacterized protein LOC101251013 isoform X1 [Solanum lycopersicum]
Solyc10g085670.1	7.316	9.91	0.392912	0.0221369	XP_015089261.1|0.0e+00|probable leucine-rich repeat receptor-like protein kinase At5g49770 [Solanum pennellii]
Solyc02g090230.2	22.893	30.956	0.392439	0.00142933	XP_004232066.1|4.7e-301|nuclear pore complex protein NUP58 [Solanum lycopersicum]
Solyc12g009570.1	27.11	35.92	0.392426	0.00102816	NP_001312712.1|1.5e-236|CBL-interacting serine/threonine-protein kinase 24-like [Nicotiana tabacum]
Solyc06g075580.2	12.686	17.133	0.39176	0.00152594	XP_016577816.1|0.0e+00|PREDICTED: 125 kDa kinesin-related protein-like [Capsicum annuum]
Solyc05g054050.2	30.286	41.08	0.391573	0.00406857	NP_001306255.1|2.9e-290|glutamate decarboxylase-like [Solanum lycopersicum]
Solyc10g008910.1	264.41	363.54	0.391195	0.00167981	XP_006289123.2|1.8e-68|histone H3-like 5 [Capsella rubella]
Solyc11g018610.1	20.59	27.893	0.390643	0.00409303	XP_018624526.1|4.3e-269|PREDICTED: calcium-dependent protein kinase 11-like isoform X1 [Nicotiana tomentosiformis]
Solyc05g054940.2	23.203	31.5	0.390608	0.0203458	XP_004239753.1|3.4e-176|nitrilase-like protein 2 [Solanum lycopersicum]
Solyc04g015610.2	26.91	36.493	0.389796	0.0125828	XP_015074208.1|2.9e-216|uncharacterized protein LOC107018281 [Solanum pennellii]
Solyc01g087620.2	172.883	227.593	0.389032	0.000861375	KCW51380.1|1.9e-35|hypothetical protein EUGRSUZ_J00924, partial [Eucalyptus grandis]
Solyc04g080160.2	22.313	30.136	0.388511	0.00130044	XP_004238244.1|7.1e-220|COP9 signalosome complex subunit 4 [Solanum lycopersicum]
Solyc06g072120.2	229.196	309.46	0.388289	0.000240234	NP_001315477.1|3.4e-171|40S ribosomal protein SA isoform 1 [Solanum lycopersicum]
Solyc05g053730.2	32.493	44.11	0.387764	0.0100645	XP_004239856.1|1.4e-107|protein PXR1 [Solanum lycopersicum]
Solyc08g075450.2	10.046	13.61	0.387368	0.0483258	XP_004246008.1|8.5e-214|WAT1-related protein At4g19185 [Solanum lycopersicum]
Solyc09g066500.2	190.586	260.043	0.38723	0.000430786	XP_009608322.1|3.0e-30|PREDICTED: H/ACA ribonucleoprotein complex subunit 3-like protein isoform X2 [Nicotiana tomentosiformis]
Solyc01g091660.2	23.64	32.083	0.387164	0.0345922	XP_004229837.1|4.1e-138|short-chain dehydrogenase reductase 3b [Solanum lycopersicum]
Solyc03g122350.2	17.386	23.43	0.38654	0.0253508	XP_004235548.1|1.8e-297|cytochrome P450 71A1 [Solanum lycopersicum]
Solyc05g054760.2	56.28	75.97	0.385971	0.00852707	NP_001234822.2|1.6e-117|dehydroascorbate reductase 1 [Solanum lycopersicum]
Solyc01g095900.2	2.613	3.503	0.385871	0.033245	XP_019066391.1|0.0e+00|protein TSS-like isoform X1 [Solanum lycopersicum]
Solyc01g056720.2	26.55	35.9	0.385801	0.0116416	NP_001293121.1|3.6e-114|probable aquaporin SIP2-1 [Solanum lycopersicum]
Solyc03g082660.2	75.086	101.106	0.385361	0.00193929	XP_006350499.1|8.7e-262|PREDICTED: molybdate-anion transporter-like [Solanum tuberosum]
Solyc05g054990.2	26.966	36.563	0.384309	0.0235857	XP_004239747.1|6.4e-83|uncharacterized protein LOC101251184 [Solanum lycopersicum]
Solyc05g013630.1	478.95	652.666	0.383198	0.00156981	CAA99759.1|1.4e-87|unknown, partial [Solanum lycopersicum]
Solyc09g090610.2	67.476	91.57	0.382539	0.00274849	AAP80667.1|2.9e-75|ribosomal Pr 117, partial [Triticum aestivum]
Solyc09g090010.2	210.96	284.746	0.382532	0.00323341	XP_004247722.1|5.3e-124|germin-like protein subfamily 1 member 19 [Solanum lycopersicum]
Solyc11g056620.1	11.273	15.166	0.381422	0.0134512	XP_004250856.1|6.8e-138|uncharacterized protein LOC101262986 [Solanum lycopersicum]
Solyc12g009110.1	149.67	201.276	0.381383	0.000263938	XP_004251689.1|5.5e-213|acetylserotonin O-methyltransferase [Solanum lycopersicum]
Solyc08g080750.2	36.206	48.893	0.381365	0.0413265	XP_004245621.1|7.0e-114|protein LURP-one-related 4-like [Solanum lycopersicum]
Solyc03g120290.2	43.226	58.403	0.381095	0.0059855	XP_004235702.1|5.4e-66|thionin-like protein 2 [Solanum lycopersicum]
Solyc04g079390.2	5.13	6.896	0.380944	0.0477822	XP_004238185.1|0.0e+00|gamma-tubulin complex component 5 [Solanum lycopersicum]
Solyc05g056170.2	147.176	197.136	0.380554	5.77279e-07	XP_009759945.1|0.0e+00|PREDICTED: phenylalanine ammonia-lyase G4-like [Nicotiana sylvestris]
Solyc05g012440.2	12.42	16.756	0.380449	0.0467829	XP_004239062.1|3.0e-165|cytochrome c oxidase assembly protein COX11, mitochondrial [Solanum lycopersicum]
Solyc02g079770.2	21.843	29.456	0.379831	0.0166041	XP_004232761.1|9.4e-128|DAG protein, chloroplastic [Solanum lycopersicum]
Solyc06g060070.2	24.776	33.363	0.379255	0.0119542	XP_004242046.1|1.8e-182|1-aminocyclopropane-1-carboxylate oxidase 5 [Solanum lycopersicum]
Solyc06g084250.2	5.93	8.013	0.379248	0.0369865	XP_015079592.1|0.0e+00|ARM REPEAT PROTEIN INTERACTING WITH ABF2-like [Solanum pennellii]
Solyc01g009100.2	181.196	243.946	0.378914	0.00085685	PHT59303.1|1.0e-57|60S ribosomal protein L30 [Capsicum baccatum]
Solyc06g067940.2	129.243	173.37	0.377934	9.36987e-05	XP_004241710.1|6.8e-91|putative cytochrome c oxidase subunit 5b-like [Solanum lycopersicum]
Solyc01g099410.2	291.296	394.016	0.377632	0.0170307	NP_001296309.1|3.7e-74|histone H2A.1 [Solanum lycopersicum]
Solyc09g090840.2	3.86	5.056	0.37752	0.0324328	XP_010326798.1|1.3e-311|glutamyl-tRNA(Gln) amidotransferase subunit B, chloroplastic/mitochondrial [Solanum lycopersicum]
Solyc08g065490.2	18.746	25.093	0.376595	0.0130433	XP_004245112.1|4.3e-304|serine hydroxymethyltransferase 3, chloroplastic [Solanum lycopersicum]
Solyc04g076830.2	13.7	18.4	0.376584	0.0212274	XP_015074151.1|7.1e-169|phosphoglycerate mutase-like protein 1 isoform X1 [Solanum pennellii]
Solyc01g100380.2	787.233	1052.73	0.375722	0.000100199	XP_004230299.1|1.6e-253|calreticulin [Solanum lycopersicum]
Solyc07g007790.2	6.063	8.126	0.374918	0.0437976	XP_015082087.1|0.0e+00|probable sucrose-phosphate synthase [Solanum pennellii]
Solyc10g006290.2	42.223	56.636	0.374736	0.00676822	NP_001234510.1|3.0e-98|constitutive plastid-lipid associated protein [Solanum lycopersicum]
Solyc01g087300.2	12.526	16.786	0.374583	0.0326175	PHT60542.1|2.6e-221|hypothetical protein CQW23_02905 [Capsicum baccatum]
Solyc02g083570.2	154.39	206.716	0.374404	4.77266e-05	XP_004232508.1|8.0e-84|ubiquitin-conjugating enzyme E2 10 [Solanum lycopersicum]
Solyc06g007520.2	172.786	232.333	0.373474	0.00165594	NP_001234751.1|5.3e-124|60S ribosomal protein L10 [Solanum lycopersicum]
Solyc01g110000.2	17.976	23.96	0.373364	0.00202779	PHU10707.1|0.0e+00|Beta-galactosidase 5 [Capsicum chinense]
Solyc02g070440.2	78.3	104.563	0.373203	0.000453061	XP_004233128.1|3.9e-220|katanin p60 ATPase-containing subunit A-like 2 [Solanum lycopersicum]
Solyc04g078940.2	15.173	20.28	0.372849	0.0164472	NP_001234563.1|0.0e+00|dem protein [Solanum lycopersicum]
Solyc02g080410.2	97.5	131.09	0.372539	0.00449691	XP_004232722.1|4.2e-73|15.4 kDa class V heat shock protein [Solanum lycopersicum]
Solyc02g077480.1	198.036	269.103	0.372263	0.00404677	XP_006289123.2|1.8e-68|histone H3-like 5 [Capsella rubella]
Solyc09g082980.2	41.283	55.246	0.371652	0.0298681	XP_004247620.1|1.2e-226|uncharacterized protein LOC101261455 [Solanum lycopersicum]
Solyc01g081300.2	10.653	14.24	0.370881	0.0459313	XP_004229526.1|1.4e-231|phosphoribosylaminoimidazole-succinocarboxamide synthase, chloroplastic [Solanum lycopersicum]
Solyc09g072820.2	29.47	39.183	0.370543	0.000503841	XP_004247500.1|0.0e+00|cellulose synthase A catalytic subunit 4 [UDP-forming] isoform X1 [Solanum lycopersicum]
BGI_novel_G000019	110.833	148.173	0.370442	0.000763321
Solyc08g065220.2	52.796	70.133	0.370416	1.47385e-05	XP_004245101.1|0.0e+00|glycine dehydrogenase (decarboxylating), mitochondrial [Solanum lycopersicum]
Solyc10g076350.1	48.023	64.463	0.37008	0.0134512	KZM86861.1|8.4e-58|hypothetical protein DCAR_023995 [Daucus carota subsp. sativus]
Solyc01g105060.2	46.74	62.496	0.370066	0.00888573	XP_004230623.1|1.1e-123|uncharacterized protein LOC101266461 [Solanum lycopersicum]
Solyc03g098050.2	99.783	133.74	0.369739	0.00152594	NP_001234786.1|7.6e-78|calmodulin [Solanum lycopersicum]
Solyc08g081930.2	40.053	53.436	0.368943	0.00159601	XP_015085407.1|2.7e-174|putative glucose-6-phosphate 1-epimerase [Solanum pennellii]
Solyc01g073680.2	30.576	40.886	0.368602	0.00969473	XP_004229337.1|3.1e-108|protein YLS3 [Solanum lycopersicum]
Solyc10g008980.2	10.456	13.946	0.368357	0.0345985	NP_001294940.1|8.8e-234|triose phosphate/phosphate translocator [Solanum lycopersicum]
Solyc06g068490.2	17.99	22.306	0.367756	0.00100908	XP_004241677.1|4.7e-249|magnesium transporter MRS2-1 [Solanum lycopersicum]
Solyc12g056250.1	143.403	191.82	0.367752	0.000149311	XP_004252589.1|1.4e-132|glutathione S-transferase T1 [Solanum lycopersicum]
Solyc08g007670.1	20.023	26.623	0.367614	0.0027868	XP_004244588.1|0.0e+00|subtilisin-like protease SBT1.7 [Solanum lycopersicum]
Solyc04g051860.2	31.803	42.69	0.367293	0.00237763	NP_001234112.1|1.1e-167|shikimate kinase, chloroplastic [Solanum lycopersicum]
Solyc01g099340.2	19.796	26.353	0.366961	0.0086363	XP_004230217.1|2.1e-251|protein indeterminate-domain 12 [Solanum lycopersicum]
Solyc05g018520.2	48.313	64.326	0.366771	0.00181675	XP_004239280.1|3.4e-187|NADH-cytochrome b5 reductase-like protein isoform X3 [Solanum lycopersicum]
Solyc10g005510.2	145.513	193.33	0.366673	0.000609474	XP_004248314.1|2.2e-237|glyceraldehyde-3-phosphate dehydrogenase GAPCP1, chloroplastic [Solanum lycopersicum]
Solyc09g061840.2	33.313	44.27	0.366358	0.0027637	NP_001352961.1|2.6e-256|acetyl-CoA C-acetyltranferase 4 [Solanum lycopersicum]
Solyc06g009020.2	380.666	494.77	0.366269	8.16589e-05	XP_004240536.1|2.3e-117|glutathione S-transferase [Solanum lycopersicum]
Solyc02g080300.2	10.556	14.06	0.365991	0.029417	XP_010316604.1|0.0e+00|beta-glucosidase 18 isoform X1 [Solanum lycopersicum]
Solyc04g050620.2	28.66	38.203	0.365693	0.0225797	XP_004237505.1|3.9e-290|cytochrome P450 CYP736A12 [Solanum lycopersicum]
Solyc00g009080.2	26.5	35.13	0.365265	0.0397112	XP_015071745.1|4.8e-32|uncharacterized protein LOC107015843 [Solanum pennellii]
Solyc08g080680.2	67.106	89.613	0.365148	0.0083784	XP_004245627.1|2.9e-78|elicitor-responsive protein 3 [Solanum lycopersicum]
Solyc02g082830.1	57.15	76.106	0.365059	0.0123256	XP_004232556.1|1.2e-248|phosphoserine aminotransferase 2, chloroplastic-like [Solanum lycopersicum]
Solyc06g053760.2	21.99	29.296	0.36504	0.0247871	XP_004241020.1|2.5e-169|syntaxin-related protein KNOLLE [Solanum lycopersicum]
Solyc10g009200.2	26.423	35.263	0.36482	0.0288929	NP_001313289.1|1.0e-111|nucleolar protein 12 domain-containing protein [Solanum lycopersicum]
Solyc05g017760.2	24.31	32.513	0.364539	0.0108694	NP_001352943.1|1.8e-224|acetyl-CoA C-acetyltranferase 1 [Solanum lycopersicum]
Solyc01g110110.2	16.69	22.163	0.3645	0.0466712	XP_004230928.1|1.9e-218|cysteine protease RD19A [Solanum lycopersicum]
Solyc05g023710.2	14.8	19.68	0.36397	0.00844802	XP_004239297.1|0.0e+00|nucleolar complex protein 2 homolog isoform X1 [Solanum lycopersicum]
Solyc00g007010.2	17.49	23.183	0.363248	0.00173175	XP_027076627.1|1.6e-310|phosphoinositide phosphatase SAC7-like [Coffea arabica]
Solyc06g066100.2	90.106	120.123	0.362898	0.00849561	XP_004241771.1|1.1e-63|uncharacterized protein At2g34160 [Solanum lycopersicum]
Solyc07g005840.2	23.883	31.593	0.362889	0.000521546	XP_004242614.1|0.0e+00|cellulose synthase A catalytic subunit 7 [UDP-forming] [Solanum lycopersicum]
Solyc01g005120.2	52.083	69.066	0.362725	0.00121956	XP_004228752.1|1.3e-201|probable xyloglucan endotransglucosylase/hydrolase protein 28 [Solanum lycopersicum]
Solyc05g014260.2	44.96	59.593	0.361793	0.00602258	XP_004239497.1|0.0e+00|two-component response regulator ORR26 isoform X1 [Solanum lycopersicum]
Solyc10g005560.2	200.903	267.05	0.36175	1.82976e-05	XP_017614081.1|5.1e-78|PREDICTED: polyubiquitin 3-like [Gossypium arboreum]
Solyc06g009140.2	255.33	339.576	0.361589	0.00394227	XP_004240547.1|8.1e-46|protein SENESCENCE-ASSOCIATED GENE 21, mitochondrial [Solanum lycopersicum]
Solyc09g082650.2	173.293	230.046	0.361314	7.56595e-05	NP_001318092.1|1.1e-87|acireductone dioxygenase [Solanum lycopersicum]
Solyc10g086180.1	77.053	101.796	0.36056	0.000102736	XP_009625397.1|0.0e+00|PREDICTED: phenylalanine ammonia-lyase [Nicotiana tomentosiformis]
Solyc01g088040.2	100.036	133.263	0.36049	0.00194942	PHU14072.1|2.4e-16|hypothetical protein BC332_15277 [Capsicum chinense]
Solyc07g055060.2	21.083	27.826	0.360158	0.00136343	XP_019262420.1|0.0e+00|PREDICTED: phosphoenolpyruvate carboxylase-like [Nicotiana attenuata]
Solyc01g079610.2	58.583	77.61	0.360004	0.00973736	XP_004229405.1|5.8e-200|dnaJ protein ERDJ3B [Solanum lycopersicum]
Solyc07g055930.2	10.833	14.336	0.359447	0.0281181	XP_004243233.1|0.0e+00|probable galacturonosyltransferase 15 [Solanum lycopersicum]
Solyc08g014550.2	46.21	61.403	0.35941	0.00695054	XP_004244773.1|1.4e-103|60S ribosomal protein L9-1 [Solanum lycopersicum]
Solyc04g056610.2	24.293	32.176	0.3592	0.0193929	XP_004237372.1|4.7e-186|uncharacterized protein LOC101252170 [Solanum lycopersicum]
Solyc12g089110.1	295.116	389.346	0.358917	2.38436e-06
Solyc05g055310.2	267.746	357.58	0.35774	0.00400762	NP_001234347.1|1.7e-37|copper chaperone [Solanum lycopersicum]
Solyc06g084500.2	23.5	31.206	0.357445	0.0258469	XP_004242318.1|3.0e-92|uncharacterized protein LOC101248116 [Solanum lycopersicum]
Solyc05g052810.2	108.453	143.986	0.3556	0.0235857	NP_001307027.1|2.6e-51|60S ribosomal protein L35a-3 [Solanum lycopersicum]
Solyc05g054590.2	43.206	56.533	0.355349	0.00212272	XP_015074621.1|6.8e-172|UDP-glucuronic acid decarboxylase 6-like [Solanum pennellii]
Solyc03g025350.2	75.166	101.966	0.355233	0.000285379	XP_010317628.1|5.0e-188|silicon efflux transporter LSI2-like [Solanum lycopersicum]
Solyc08g062820.2	27.496	36.386	0.354761	0.021414	XP_004245078.1|2.1e-118|cytokinin riboside 5'-monophosphate phosphoribohydrolase LOG8 [Solanum lycopersicum]
Solyc04g078920.2	42.683	56.493	0.354705	0.0050603	XP_004238156.1|4.8e-64|non-specific lipid-transfer protein-like 1 [Solanum lycopersicum]
Solyc02g093720.2	14.796	19.51	0.354593	0.0103673	XP_004231816.1|2.2e-289|protein WVD2-like 4 [Solanum lycopersicum]
Solyc06g068650.2	97.68	128.536	0.354081	4.95068e-05	XP_015080149.1|5.0e-310|4-coumarate--CoA ligase 2 [Solanum pennellii]
Solyc06g083820.2	182.113	241.52	0.35398	0.0323541	XP_004242367.1|1.9e-66|60S ribosomal protein L14-1 [Solanum lycopersicum]
Solyc02g093860.2	50.653	66.756	0.353582	0.00115056	XP_015064000.1|4.0e-265|lysine histidine transporter 1-like [Solanum pennellii]
Solyc01g091040.2	24.673	32.496	0.353455	0.0357783	XP_004229796.1|3.7e-172|cysteine-rich repeat secretory protein 15 [Solanum lycopersicum]
Solyc02g063170.2	56.736	75.46	0.353256	0.0021366	XP_004233491.1|2.6e-136|protein ABA DEFICIENT 4, chloroplastic-like isoform X1 [Solanum lycopersicum]
Solyc03g117330.2	35.4	46.893	0.353177	0.00565532	XP_015071220.1|8.0e-293|proline--tRNA ligase, cytoplasmic-like isoform X2 [Solanum pennellii]
Solyc07g009030.2	2055.68	2752.18	0.353158	0.0231174	XP_015081705.1|4.1e-51|defensin D1-like [Solanum pennellii]
Solyc12g056460.1	21.233	26.836	0.352782	0.0407785	XP_004252597.1|1.2e-108|MADS-box protein SOC1-like [Solanum lycopersicum]
Solyc10g081180.1	156.736	207.456	0.352742	0.00321819	XP_006339233.1|3.2e-115|PREDICTED: glycine-rich RNA-binding protein 2, mitochondrial-like [Solanum tuberosum]
Solyc02g083410.2	5.36	6.896	0.352724	0.0440727	XP_004232522.1|5.3e-271|15-cis-phytoene desaturase, chloroplastic/chromoplastic [Solanum lycopersicum]
Solyc11g072600.1	63.823	83.733	0.352564	0.00377304	XP_010313188.1|2.0e-284|AP2 transcription factor SlAP2d isoform X1 [Solanum lycopersicum]
Solyc11g006970.1	91.84	121.376	0.35246	0.00208333	NP_001295115.1|4.7e-159|ACT domain-containing protein [Solanum lycopersicum]
Solyc06g083790.2	134.63	175.09	0.352395	2.47627e-05	NP_001303967.1|2.9e-233|succinate--CoA ligase [ADP-forming] subunit beta, mitochondrial [Solanum lycopersicum]
Solyc05g009530.2	33.806	44.506	0.352189	0.033986	XP_004238940.1|5.6e-255|dihydrolipoyllysine-residue acetyltransferase component 4 of pyruvate dehydrogenase complex, chloroplastic [Solanum lycopersicum]
Solyc12g021230.1	15.25	19.716	0.352184	0.0126928	XP_006355766.1|0.0e+00|PREDICTED: DNA gyrase subunit B, chloroplastic/mitochondrial [Solanum tuberosum]
Solyc07g054740.2	33.69	44.313	0.350989	0.00734735	XP_004243312.1|1.0e-148|vesicle-associated protein 4-2 [Solanum lycopersicum]
Solyc01g105830.2	5.766	7.556	0.350708	0.0494626	XP_010315130.1|0.0e+00|probable ubiquitin-like-specific protease 2A isoform X2 [Solanum lycopersicum]
Solyc06g083180.2	229.796	302.74	0.350341	0.00215169	XP_004242427.1|1.1e-121|40S ribosomal protein S8 [Solanum lycopersicum]
Solyc02g081810.2	79.563	104.513	0.349957	0.0232329	XP_004232632.1|0.0e+00|H/ACA ribonucleoprotein complex subunit 4 [Solanum lycopersicum]
Solyc11g017010.1	194.153	254.843	0.349917	1.91359e-05	NP_001289830.1|4.4e-293|sucrose transport protein [Solanum lycopersicum]
Solyc08g014610.2	103.36	135.793	0.349761	0.00156309	XP_004244777.1|7.1e-270|gamma aminobutyrate transaminase 2-like [Solanum lycopersicum]
Solyc01g098810.2	20.456	26.973	0.34935	0.0401241	XP_004230179.1|9.6e-133|alpha-crystallin domain-containing protein 22.3 [Solanum lycopersicum]
Solyc08g083120.2	138.006	182.273	0.34892	0.0172233	XP_021805473.1|4.2e-68|polyubiquitin 11-like [Prunus avium]
Solyc12g014230.1	38.526	50.636	0.348736	0.00527345	XP_004251891.1|2.9e-266|multiple organellar RNA editing factor 8, chloroplastic/mitochondrial [Solanum lycopersicum]
Solyc01g073950.2	10.656	13.996	0.348703	0.0285473	XP_004229352.1|0.0e+00|ankyrin repeat, bromo and BTB domain-containing protein DDB_G0293800 [Solanum lycopersicum]
Solyc05g056000.2	40.71	53.443	0.348393	0.00641152	XP_004239680.1|1.6e-196|caffeoylshikimate esterase [Solanum lycopersicum]
Solyc07g065480.2	51.753	68.236	0.348095	0.00763932	XP_004244072.1|2.4e-76|uncharacterized protein LOC101259461 [Solanum lycopersicum]
Solyc06g072810.2	27.643	36.26	0.347796	0.0197316	XP_004242132.1|0.0e+00|uncharacterized protein LOC101245265 [Solanum lycopersicum]
Solyc09g074630.2	10.14	13.336	0.347729	0.0493083	XP_010326604.1|0.0e+00|BTB/POZ domain-containing protein At1g03010 isoform X2 [Solanum lycopersicum]
Solyc11g006910.1	103.64	138.956	0.347249	0.0207135	XP_004249961.1|6.9e-67|ferredoxin, root R-B2 [Solanum lycopersicum]
Solyc03g083030.2	18.856	24.763	0.346268	0.0340604	XP_010318026.1|1.4e-185|protein ABIL3 [Solanum lycopersicum]
Solyc02g070540.2	40.303	52.863	0.346238	0.0487057	NP_001316144.1|1.9e-227|carbohydrate binding domain-containing protein precursor [Solanum lycopersicum]
Solyc04g072460.2	24.88	32.666	0.346115	0.0377994	XP_010320138.1|3.0e-205|transcription factor TGA4 isoform X1 [Solanum lycopersicum]
Solyc04g081200.2	33.33	43.63	0.346085	0.00487123	XP_004238336.1|0.0e+00|protein RCC2 [Solanum lycopersicum]
Solyc01g106430.2	88.766	116.363	0.346036	0.000336698	XP_004230656.1|5.4e-167|soluble inorganic pyrophosphatase 6, chloroplastic [Solanum lycopersicum]
Solyc00g047700.2	118.13	154.636	0.345136	0.0386568	XP_004253373.2|8.1e-95|RGG repeats nuclear RNA binding protein A-like, partial [Solanum lycopersicum]
Solyc03g082480.2	45.386	59.656	0.345132	0.00663775	XP_004235012.1|3.5e-107|GRF1-interacting factor 2-like [Solanum lycopersicum]
Solyc06g065430.2	29.763	39	0.345097	0.00519225	XP_004241821.1|3.0e-283|beta-amyrin 28-monooxygenase-like [Solanum lycopersicum]
Solyc12g099570.1	43.303	57.183	0.344865	0.0209773	XP_006349812.1|6.5e-15|PREDICTED: heat shock factor-binding protein 1 [Solanum tuberosum]
Solyc06g068440.2	57.66	75.556	0.344653	0.00476924	XP_006356249.1|5.4e-191|PREDICTED: cinnamoyl-CoA reductase 1 [Solanum tuberosum]
Solyc02g068130.2	61.466	80.76	0.344026	0.00296486	XP_004233293.1|1.9e-115|mitochondrial import receptor subunit TOM20 [Solanum lycopersicum]
Solyc06g082090.2	111.44	145.873	0.343816	0.00507752	XP_004242516.1|1.0e-219|ERBB-3 BINDING PROTEIN 1 [Solanum lycopersicum]
Solyc08g007490.2	24.163	32.083	0.343695	0.0208645	XP_004244578.1|5.9e-135|uncharacterized protein LOC101267545 [Solanum lycopersicum]
Solyc02g072240.2	17.836	23.253	0.34222	0.00160978	XP_004233024.1|0.0e+00|cellulose synthase A catalytic subunit 8 [UDP-forming] [Solanum lycopersicum]
Solyc04g015590.2	21.136	27.696	0.341796	0.0305572	XP_004236616.1|1.1e-93|putative anthocyanidin reductase [Solanum lycopersicum]
Solyc07g049450.2	82.986	108.366	0.34159	0.00158943	XP_004243508.1|5.9e-251|protein disulfide isomerase-like 2-3 [Solanum lycopersicum]
Solyc03g082920.2	162.436	212.03	0.341416	0.0151835	NP_001312029.1|0.0e+00|luminal-binding protein 5 precursor [Nicotiana tabacum]
Solyc08g016750.2	26.376	34.443	0.340899	0.0166198	XP_004244808.1|2.9e-232|pyruvate dehydrogenase E1 component subunit beta-3, chloroplastic-like [Solanum lycopersicum]
Solyc04g074870.2	16.123	21.103	0.34002	0.0367647	XP_004237961.1|1.1e-207|purine permease 1 [Solanum lycopersicum]
Solyc10g054060.1	47.536	62.546	0.339976	0.0245679	XP_004248694.1|4.9e-50|uncharacterized protein LOC101259299 [Solanum lycopersicum]
Solyc07g009320.2	18.266	23.89	0.339878	0.0412961	NP_001333501.1|5.4e-186|metaxin-related protein [Solanum lycopersicum]
Solyc05g053810.2	236.526	308.116	0.339738	3.86769e-05	XP_004239849.1|3.5e-278|serine hydroxymethyltransferase 4 [Solanum lycopersicum]
Solyc06g069490.2	22.826	29.833	0.339198	0.0249301	XP_004241603.1|2.0e-180|transmembrane protein adipocyte-associated 1 homolog [Solanum lycopersicum]
Solyc09g011870.1	30.91	40.4	0.338877	0.0425717	XP_004246360.1|3.6e-223|arogenate dehydrogenase 2, chloroplastic-like [Solanum lycopersicum]
Solyc12g045030.1	218.09	285.86	0.338148	0.0107504	XP_010314314.1|1.1e-149|uncharacterized protein LOC101255178 [Solanum lycopersicum]
Solyc06g069890.2	49.19	64.243	0.337696	0.0167285	XP_015077208.1|7.7e-149|NAP1-related protein 2-like [Solanum pennellii]
Solyc03g118290.2	30.886	40.126	0.337474	0.00354763	NP_001233765.1|0.0e+00|auxin response factor 2A [Solanum lycopersicum]
Solyc01g091220.2	106.583	139.146	0.336502	0.00330847	NP_001275221.1|8.0e-80|40S ribosomal protein S13-like [Solanum tuberosum]
Solyc08g075960.2	78.493	102.586	0.336061	0.0198219	XP_004245954.1|3.6e-123|MOB kinase activator-like 1A [Solanum lycopersicum]
Solyc10g081010.1	17.37	22.53	0.335607	0.0432655	XP_004249329.1|1.3e-287|vacuolar protein-sorting protein bro1-like [Solanum lycopersicum]
Solyc03g123500.2	90.006	117.056	0.335268	0.000294813	NP_001234462.2|4.8e-228|GCC box binding protein C.4 [Solanum lycopersicum]
Solyc07g055210.2	92.86	120.65	0.335214	0.000224037	NP_001297076.1|2.1e-251|aspartate aminotransferase, mitochondrial [Solanum lycopersicum]
Solyc11g045110.1	10.17	13.073	0.33476	0.0133122	XP_004250761.1|0.0e+00|probable sucrose-phosphate synthase 4 [Solanum lycopersicum]
Solyc05g008600.2	262.02	340.26	0.333862	1.42586e-05	XP_004238877.1|1.3e-223|fructose-bisphosphate aldolase 3, chloroplastic [Solanum lycopersicum]
Solyc03g058920.2	107.513	139.843	0.333626	0.0160047	XP_004234781.2|1.0e-152|mitochondrial outer membrane protein porin of 34 kDa [Solanum lycopersicum]
Solyc07g008370.2	180.67	235.3	0.333545	0.0202248	NP_001333780.1|2.1e-134|ribosomal protein L30/L7 family protein [Solanum lycopersicum]
Solyc06g059800.2	30.916	40.223	0.333371	0.00237763	NP_001305987.1|1.0e-259|ACT domain-containing protein [Solanum lycopersicum]
Solyc03g098470.2	84.71	110.973	0.333188	0.0117697	OIS97104.1|7.0e-43|hypothetical protein A4A49_04200 [Nicotiana attenuata]
Solyc04g011480.2	102.73	135.24	0.333116	0.0236897	XP_004236750.1|6.1e-90|CASP-like protein PIMP1 [Solanum lycopersicum]
Solyc01g009850.2	44.08	57.84	0.333092	0.0390818	XP_004228434.1|7.1e-35|uncharacterized protein LOC101264851 [Solanum lycopersicum]
Solyc06g066660.2	313.75	410.443	0.33236	0.00763499	XP_004241731.1|1.1e-48|60S ribosomal protein L37-2 [Solanum lycopersicum]
Solyc10g011660.2	54.53	70.83	0.332073	0.00182652	XP_004248075.1|0.0e+00|jasmonic acid-amido synthetase JAR1 [Solanum lycopersicum]
Solyc04g074270.2	24.246	30.996	0.332071	0.00103359	XP_004237919.1|0.0e+00|uncharacterized protein LOC101256969 [Solanum lycopersicum]
Solyc10g085020.1	259.533	336.456	0.330419	0.00200427	XP_009794774.1|1.1e-263|PREDICTED: tubulin beta-2 chain [Nicotiana sylvestris]
Solyc09g014770.2	31.66	40.94	0.330336	0.00469239	XP_015088034.1|0.0e+00|AMP deaminase [Solanum pennellii]
Solyc01g080890.2	115.476	150.133	0.329983	0.0129116	XP_015063203.1|2.3e-35|uncharacterized protein LOC107008608 [Solanum pennellii]
Solyc01g106080.2	69.843	90.523	0.329706	0.0111139	XP_015062981.1|4.3e-311|methylmalonate-semialdehyde dehydrogenase [acylating], mitochondrial [Solanum pennellii]
Solyc05g024410.2	187.136	243.113	0.329049	0.00647312	XP_004239307.1|7.6e-198|nitrile-specifier protein 5 [Solanum lycopersicum]
Solyc09g009040.2	17.226	22.32	0.328763	0.0305439	NP_001238799.2|5.5e-214|delta14-sterol reductase [Solanum lycopersicum]
Solyc06g075650.2	247.166	320.903	0.328564	0.000461644	NP_001274695.1|8.1e-141|aquaporin TIP1-3-like [Solanum lycopersicum]
Solyc05g005760.2	21.21	27.436	0.328353	0.0139427	XP_010320595.1|8.3e-292|uncharacterized protein LOC101255990 isoform X2 [Solanum lycopersicum]
Solyc05g014980.2	77.953	101.006	0.328325	0.00067777	XP_004239196.1|1.2e-133|adenylate kinase 4 [Solanum lycopersicum]
Solyc09g061310.2	40.146	52.016	0.327931	0.00668746	XP_004247089.1|4.3e-154|desumoylating isopeptidase 1 [Solanum lycopersicum]
Solyc08g080340.2	14.63	18.95	0.327699	0.0344222	XP_004245650.1|2.2e-272|lysophospholipid acyltransferase 1 [Solanum lycopersicum]
Solyc12g010860.1	76.213	97.106	0.327459	0.0147959	XP_016541579.1|4.9e-131|PREDICTED: 14-3-3 protein 8 isoform X1 [Capsicum annuum]
Solyc07g045240.2	49.696	64.34	0.326941	0.00802363	XP_004243590.1|1.7e-203|heterogeneous nuclear ribonucleoprotein 1 [Solanum lycopersicum]
Solyc02g024050.2	536.546	693.21	0.326937	3.29492e-05	XP_004231567.1|3.7e-220|ferredoxin--NADP reductase, root-type isozyme, chloroplastic [Solanum lycopersicum]
Solyc00g020840.2	484.513	631.84	0.326139	0.0248542	XP_004253331.2|1.5e-123|ferric reduction oxidase 4 [Solanum lycopersicum]
Solyc08g076340.2	297.92	389.213	0.325683	0.00676973	EXB24685.1|4.2e-29|40S ribosomal protein S30 [Morus notabilis]
Solyc06g054560.2	19.336	24.916	0.324872	0.0148519	XP_015079346.1|0.0e+00|ISWI chromatin-remodeling complex ATPase CHR11-like [Solanum pennellii]
Solyc09g007900.2	53.286	68.783	0.324789	0.0243825	AXY78876.1|0.0e+00|phenylalanine ammonia-lyase [Solanum tuberosum]
Solyc08g068700.1	167.373	217.523	0.324575	0.030518	NP_001234154.1|2.2e-141|N-hydroxycinnamoyl-CoA:tyramine N-hydroxycinnamoyl transferase THT7-1 [Solanum lycopersicum]
Solyc07g009330.2	246.766	320.89	0.324572	0.0181087	NP_001309732.1|3.0e-60|60S acidic ribosomal protein P3-like [Solanum lycopersicum]
Solyc04g080810.2	31.42	40.7	0.324425	0.0287626	NP_001310969.1|1.3e-91|probable ubiquitin-conjugating enzyme E2 16 [Solanum lycopersicum]
Solyc01g009860.2	68.723	88.93	0.324403	0.0140613	NP_001233811.1|5.7e-156|uncharacterized protein LOC100147720 [Solanum lycopersicum]
Solyc05g050130.2	31.013	40.096	0.324002	0.0497402	XP_004240090.1|6.2e-170|acidic endochitinase [Solanum lycopersicum]
Solyc04g054310.2	26	33.55	0.323931	0.00930908	XP_015073548.1|5.6e-273|alanine--glyoxylate aminotransferase 2 homolog 1, mitochondrial isoform X1 [Solanum pennellii]
Solyc01g099670.2	303.336	392.166	0.323476	0.000891174	XP_009622354.1|7.4e-110|PREDICTED: 40S ribosomal protein S10-1-like [Nicotiana tomentosiformis]
Solyc10g038080.1	15.956	20.613	0.323459	0.0483122	XP_010327280.1|5.2e-294|bifunctional 3-dehydroquinate dehydratase/shikimate dehydrogenase, chloroplastic [Solanum lycopersicum]
Solyc01g095150.2	70.466	91.22	0.323388	0.0269676	NP_001234431.1|3.5e-93|late embryogenesis (Lea)-like protein [Solanum lycopersicum]
Solyc08g077550.2	22.14	28.636	0.323167	0.0472484	XP_004245842.1|3.8e-140|novel plant SNARE 11 [Solanum lycopersicum]
Solyc01g008090.2	436.55	568.053	0.322992	0.00183835	XP_004228542.1|1.1e-44|40S ribosomal protein S27-2 isoform X1 [Solanum lycopersicum]
Solyc05g015530.2	111.576	144.83	0.322969	0.00538164	XP_004239223.1|2.8e-29|stress-associated endoplasmic reticulum protein 2 [Solanum lycopersicum]
Solyc09g073000.2	70.49	90.9	0.322728	0.0170651	XP_004247491.1|9.7e-257|elongation factor Tu, mitochondrial [Solanum lycopersicum]
Solyc00g323130.2	569.496	736.39	0.322282	9.07494e-05	XP_010319391.1|2.3e-121|kirola-like [Solanum lycopersicum]
Solyc09g065330.2	267.84	347.103	0.322194	0.00502667	XP_004247175.1|1.8e-68|40S ribosomal protein S24-1 [Solanum lycopersicum]
Solyc11g005840.1	92.856	119.68	0.321307	0.00921118	XP_004249899.1|0.0e+00|uncharacterized protein LOC101247180 [Solanum lycopersicum]
Solyc07g055810.2	7.696	9.91	0.321247	0.0450753	XP_004243241.1|0.0e+00|probable LRR receptor-like serine/threonine-protein kinase At1g07650 [Solanum lycopersicum]
Solyc03g112900.2	118.746	153.41	0.321172	0.000928074	XP_004236211.1|1.9e-89|iron-sulfur cluster assembly protein 1 [Solanum lycopersicum]
Solyc05g054480.2	23.6	30.41	0.319399	0.0330634	XP_016572182.1|2.5e-215|PREDICTED: actin-58 [Capsicum annuum]
Solyc03g116900.2	14.416	18.48	0.319292	0.0368466	XP_016480878.1|3.1e-274|PREDICTED: metal transporter Nramp6-like [Nicotiana tabacum]
Solyc01g091930.2	10.556	13.606	0.319237	0.0309434	XP_015068795.1|0.0e+00|subtilisin-like protease SBT4.14 [Solanum pennellii]
Solyc01g102760.2	52.186	67.166	0.318369	0.00527591	NP_001234697.1|1.1e-145|putative alfin-like transcription factor [Solanum lycopersicum]
Solyc08g082070.2	35.343	45.396	0.318185	0.0143571	XP_004245534.1|2.8e-283|high mobility group B protein 6-like [Solanum lycopersicum]
Solyc06g066170.2	32.86	42.286	0.318077	0.0476603	XP_016574984.1|2.1e-163|PREDICTED: isoflavone reductase homolog [Capsicum annuum]
Solyc09g074860.2	68.913	89.346	0.316583	0.0494911	XP_004247441.1|2.3e-34|cytochrome b-c1 complex subunit 6 [Solanum lycopersicum]
Solyc11g005150.1	83.48	106.966	0.315291	0.000419882	XP_004249854.1|0.0e+00|leucine-rich repeat extensin-like protein 6 [Solanum lycopersicum]
Solyc08g007220.2	162.623	208.783	0.31463	0.0291343	XP_015084815.1|5.5e-174|RGG repeats nuclear RNA binding protein A-like isoform X1 [Solanum pennellii]
Solyc04g080670.2	14.89	18.48	0.314416	0.0343258	XP_004238270.2|6.7e-218|inositol-pentakisphosphate 2-kinase isoform X1 [Solanum lycopersicum]
Solyc07g065890.2	21.126	27.04	0.312374	0.0305474	XP_027127684.1|8.0e-234|uridine kinase-like protein 3 isoform X1 [Coffea arabica]
Solyc05g005190.2	131.55	169.486	0.312282	0.0147102	OIV93727.1|9.2e-100|hypothetical protein TanjilG_16578 [Lupinus angustifolius]
Solyc04g010240.2	275.223	354.686	0.312029	0.00571331	OIT23378.1|4.7e-60|60s ribosomal protein l35-4, partial [Nicotiana attenuata]
Solyc02g087880.2	98.38	125.9	0.311601	0.041916	XP_004232226.1|1.8e-265|tubulin alpha chain-like [Solanum lycopersicum]
Solyc10g008770.2	24.6	31.543	0.311308	0.0331447	XP_004248136.1|9.6e-166|nudix hydrolase 15, mitochondrial-like [Solanum lycopersicum]
Solyc03g118040.2	334.633	427.59	0.311138	0.00895752	NP_001234129.1|0.0e+00|calnexin-like protein precursor [Solanum lycopersicum]
Solyc08g076860.2	121.566	155.903	0.310553	0.0391867	XP_015083190.1|1.9e-143|uncharacterized protein LOC107026660 [Solanum pennellii]
Solyc06g050930.2	23.376	29.81	0.309667	0.00895919	NP_001299814.1|0.0e+00|cytosolic endo-beta-N-acetylglucosaminidase [Solanum lycopersicum]
Solyc01g066840.2	415.21	534.703	0.309281	0.00401949	XP_004229241.1|2.4e-40|40S ribosomal protein S21-2 [Solanum lycopersicum]
Solyc04g015050.2	37.033	47.483	0.309008	0.0380903	XP_004236654.1|2.3e-103|trafficking protein particle complex subunit 5 [Solanum lycopersicum]
Solyc12g014250.1	45.606	58.086	0.308942	0.000448865	XP_009604678.1|0.0e+00|PREDICTED: phosphoenolpyruvate carboxylase [Nicotiana tomentosiformis]
Solyc08g075430.2	42.826	54.576	0.308732	0.000957556	NP_001353436.1|0.0e+00|ABC transporter G family member 22 [Solanum lycopersicum]
Solyc01g005230.2	43.906	56.133	0.308622	0.0150438	XP_004228938.1|5.5e-196|probable S-adenosylmethionine-dependent methyltransferase At5g38780 [Solanum lycopersicum]
Solyc05g026310.2	17.3	21.946	0.308584	0.0499188	XP_004239327.1|2.1e-161|derlin-1 [Solanum lycopersicum]
Solyc11g010210.1	28.3	36.176	0.308515	0.0267587	XP_025884061.1|0.0e+00|putative WEB family protein At1g65010, chloroplastic isoform X2 [Solanum lycopersicum]
Solyc03g096960.2	48.32	62.113	0.308139	0.0475186	XP_004235345.1|2.2e-64|uncharacterized protein LOC101266804 [Solanum lycopersicum]
Solyc02g088900.2	15.323	19.553	0.307909	0.0386568	XP_004232161.1|1.8e-213|probable sugar phosphate/phosphate translocator At3g17430 [Solanum lycopersicum]
Solyc11g044750.1	31.4	38.956	0.307891	0.0424033	XP_010313085.1|3.5e-128|mtDNA-binding protein WHIRLY2-like isoform X1 [Solanum lycopersicum]
Solyc11g072930.1	70.316	89.726	0.307549	0.00514584	XP_004251454.1|0.0e+00|putative leucine-rich repeat receptor-like protein kinase At2g19210 [Solanum lycopersicum]
Solyc07g066380.2	110.246	142.396	0.307422	0.0180615	XP_025888454.1|5.5e-19|uncharacterized protein LOC112942081 [Solanum lycopersicum]
Solyc10g074700.1	17.976	22.773	0.306587	0.0429419	XP_004249014.1|2.5e-238|ethanolamine-phosphate cytidylyltransferase [Solanum lycopersicum]
Solyc03g083280.2	18.37	23.41	0.305364	0.0414918	XP_004234966.1|5.2e-149|pentatricopeptide repeat-containing protein At3g49240, mitochondrial [Solanum lycopersicum]
Solyc05g015950.2	201.056	255.39	0.304281	0.00034199	XP_015076513.1|0.0e+00|glucose-6-phosphate 1-dehydrogenase, chloroplastic [Solanum pennellii]
Solyc07g064040.2	142.833	182.056	0.303599	0.000901904	XP_004244159.1|1.0e-129|transcription factor ILR3 [Solanum lycopersicum]
Solyc04g074300.2	413.11	525.866	0.303354	0.0134986	XP_004237924.1|9.9e-160|40S ribosomal protein S2-4 [Solanum lycopersicum]
Solyc07g045350.2	22.963	28.683	0.303196	0.0482321	AOX15268.1|7.1e-221|acetyl CoA acetyltransferase [Withania somnifera]
Solyc10g006470.2	224.81	287.56	0.303102	0.00173444	XP_004248369.1|6.7e-58|protein translation factor SUI1 homolog [Solanum lycopersicum]
Solyc06g074430.2	265.95	340.426	0.302476	0.0223237	XP_004241310.1|5.4e-54|60S acidic ribosomal protein P2 [Solanum lycopersicum]
Solyc01g067640.2	19.093	24.236	0.302409	0.0165611	XP_016541649.1|0.0e+00|PREDICTED: probable serine/threonine-protein kinase At1g54610 [Capsicum annuum]
Solyc02g024070.2	20.186	25.596	0.301744	0.0316289	XP_010315636.1|0.0e+00|homeobox-leucine zipper protein ATHB-14-like [Solanum lycopersicum]
Solyc10g085310.1	100.51	128.693	0.301569	0.0186034	XP_004249671.1|5.0e-118|abscisic acid receptor PYL4 [Solanum lycopersicum]
Solyc01g067740.2	395.07	503.93	0.30093	0.00571608	NP_001234031.2|2.0e-83|superoxide dismutase [Cu-Zn] 2 [Solanum lycopersicum]
Solyc06g007570.2	75.94	96.7	0.30084	0.0180349	XP_004240435.1|8.2e-122|40S ribosomal protein S8-2 [Solanum lycopersicum]
Solyc10g083290.1	38.396	48.73	0.300429	0.0254296	NP_001233842.2|0.0e+00|acid invertase [Solanum lycopersicum]
Solyc03g005090.2	51.91	61.693	0.298885	0.0126347	XP_004234006.1|0.0e+00|uncharacterized protein LOC101252360 [Solanum lycopersicum]
Solyc05g010260.2	48.936	62	0.298811	0.00931036	XP_004238989.1|1.7e-158|6-phosphogluconate dehydrogenase, decarboxylating 3 [Solanum lycopersicum]
Solyc07g005560.2	638.66	814.33	0.298629	5.97655e-05	NP_001234503.1|4.9e-87|eukaryotic translation initiation factor 5A-2 [Solanum lycopersicum]
Solyc12g056120.1	313.786	397.64	0.298614	0.00498133	XP_004252580.1|3.0e-283|6-phosphogluconate dehydrogenase, decarboxylating 2, chloroplastic [Solanum lycopersicum]
Solyc06g065590.2	333.626	423.956	0.298113	0.0026309	PHT45742.1|2.0e-101|60S ribosomal protein L18a [Capsicum baccatum]
Solyc03g114890.2	55.993	71.036	0.298044	0.00699559	XP_019068610.1|2.2e-246|COBRA-like protein 4 isoform X1 [Solanum lycopersicum]
Solyc06g069400.2	60.006	76.123	0.297978	0.00804363	XP_004241610.1|4.6e-175|isoaspartyl peptidase/L-asparaginase [Solanum lycopersicum]
Solyc06g071920.2	296.37	375.46	0.296809	0.00207838	XP_004241503.1|2.3e-189|glyceraldehyde-3-phosphate dehydrogenase, cytosolic [Solanum lycopersicum]
Solyc06g075810.2	225.713	288.153	0.296238	0.00855769	XP_004241241.1|1.7e-46|NADH dehydrogenase [ubiquinone] 1 alpha subcomplex subunit 2 [Solanum lycopersicum]
Solyc08g065250.2	13.51	17.506	0.29566	0.0227261	XP_004245365.2|0.0e+00|probable serine/threonine-protein kinase SIS8 [Solanum lycopersicum]
Solyc01g110390.2	92.533	117.083	0.295327	0.00994054	XP_004230965.1|4.2e-63|NADH dehydrogenase [ubiquinone] 1 beta subcomplex subunit 9 [Solanum lycopersicum]
Solyc09g007920.2	1454.02	1838.43	0.295232	0.033102	AXY78876.1|0.0e+00|phenylalanine ammonia-lyase [Solanum tuberosum]
Solyc04g014510.2	1084.24	1371.92	0.294318	0.0149762	NP_001309987.1|3.8e-214|glutamine synthetase cytosolic isozyme 1-1 [Solanum lycopersicum]
Solyc11g012150.1	28.213	33.983	0.293736	0.0140262	XP_004250258.1|1.8e-291|transcription initiation factor IIF subunit alpha isoform X2 [Solanum lycopersicum]
Solyc09g091950.1	27.63	34.96	0.293217	0.0316516	XP_004247959.1|8.6e-239|ethylene-responsive transcription factor ERF062 [Solanum lycopersicum]
Solyc08g076360.2	20.413	25.8	0.292976	0.0489939	NP_001233814.1|1.4e-208|gamma-tocopherol methyltransferase isoform 2 [Solanum lycopersicum]
Solyc10g017850.2	48.446	61.246	0.291794	0.0440727	NP_001234463.1|4.3e-126|uncharacterized protein LOC543655 [Solanum lycopersicum]
Solyc05g013990.2	93.826	118.296	0.291646	0.0491834	XP_004239159.1|1.7e-305|T-complex protein 1 subunit epsilon [Solanum lycopersicum]
Solyc06g065980.2	127.733	161.863	0.291189	0.0423483	XP_004241781.1|8.9e-64|uncharacterized protein At2g34160 isoform X2 [Solanum lycopersicum]
Solyc06g060260.2	49.91	62.94	0.291184	0.0180962	NP_001293099.1|1.0e-198|stromal ascorbate peroxidase 7 [Solanum lycopersicum]
Solyc11g005370.1	30.596	38.596	0.291068	0.0309892	XP_004249874.1|8.1e-47|sm-like protein LSM3A [Solanum lycopersicum]
Solyc09g008920.2	35.06	44.23	0.290955	0.0178823	NP_001353636.1|1.7e-188|geranylgeranyl diphosphate synthase [Solanum lycopersicum]
Solyc05g007290.1	9.04	11.373	0.290705	0.0371578	XP_004238788.1|0.0e+00|PH, RCC1 and FYVE domains-containing protein 1-like [Solanum lycopersicum]
Solyc05g056280.2	30.763	38.8	0.290466	0.035457	XP_004239650.1|4.4e-227|U1 snRNP-associated protein usp106 [Solanum lycopersicum]
Solyc12g095880.1	85.45	107.786	0.290138	0.00493025	XP_004253102.1|2.1e-284|ATP-dependent 6-phosphofructokinase 6-like isoform X1 [Solanum lycopersicum]
Solyc01g109700.2	20.526	25.586	0.289383	0.0400918	NP_001335303.1|4.5e-249|basic helix-loop-helix (bHLH) DNA-binding superfamily protein [Solanum lycopersicum]
Solyc05g054580.2	605.486	762.39	0.289372	0.0203547	XP_004239781.1|9.9e-175|60S acidic ribosomal protein P0 [Solanum lycopersicum]
Solyc09g082780.2	421.066	531.45	0.289286	0.0129305	XP_004247611.1|7.2e-144|stem-specific protein TSJT1 [Solanum lycopersicum]
Solyc05g009420.1	46.46	58.763	0.288966	0.0367255	XP_004238933.1|2.2e-178|uncharacterized protein LOC101255885 [Solanum lycopersicum]
Solyc03g119200.2	169.386	212.9	0.288757	0.000503999	XP_004235785.1|1.1e-246|L-Ala-D/L-amino acid epimerase [Solanum lycopersicum]
Solyc05g010300.2	31.87	40.17	0.288246	0.034219	XP_004238992.1|1.9e-177|DNA-directed RNA polymerases II, IV and V subunit 3 [Solanum lycopersicum]
Solyc10g009150.2	2070.23	2625.98	0.287889	0.00607858	XP_004248104.1|1.2e-106|organ-specific protein S2 [Solanum lycopersicum]
Solyc09g010400.2	375.623	474.573	0.287703	0.003826	XP_004246465.1|8.5e-75|histone H2A [Solanum lycopersicum]
Solyc04g011370.2	65.88	83.153	0.28691	0.0210946	XP_004236758.1|1.4e-76|actin-depolymerizing factor 2 [Solanum lycopersicum]
Solyc01g105710.2	83.06	104.923	0.286469	0.0171128	NP_001233825.1|7.5e-61|peptidyl-prolyl isomerase FKBP12 [Solanum lycopersicum]
Solyc02g070640.2	292.32	370.023	0.285733	0.0145784	NP_001275252.1|6.6e-101|uncharacterized protein LOC102577837 [Solanum tuberosum]
Solyc06g065230.2	44.296	55.896	0.285684	0.0358472	XP_004241836.1|1.9e-96|N-terminal acetyltransferase B complex catalytic subunit NAA20 isoform X1 [Solanum lycopersicum]
Solyc09g074680.2	22.07	27.676	0.285586	0.0200752	XP_006352809.1|0.0e+00|PREDICTED: cullin-1-like [Solanum tuberosum]
Solyc03g095190.2	113.263	142.54	0.285081	0.0119531	XP_004235207.1|7.6e-108|ATP synthase subunit delta', mitochondrial [Solanum lycopersicum]
Solyc02g064970.2	974.406	1226.18	0.284865	0.000887108	XP_004233442.2|1.0e-185|peroxidase 25 [Solanum lycopersicum]
Solyc09g075330.2	61.766	77.566	0.28449	0.0337819	XP_004247401.1|0.0e+00|probable pectinesterase/pectinesterase inhibitor 7 [Solanum lycopersicum]
Solyc02g093230.2	41.416	52.09	0.28412	0.0374856	XP_004231857.1|2.3e-136|caffeoyl-CoA O-methyltransferase [Solanum lycopersicum]
Solyc03g096820.2	42.103	52.833	0.283543	0.0270563	NP_001340701.1|0.0e+00|aluminum-activated malate transporter protein ALMT4 [Solanum lycopersicum]
Solyc08g005020.2	76.803	96.843	0.283448	0.0466533	XP_024030732.1|4.4e-63|prostatic spermine-binding protein [Morus notabilis]
Solyc05g005710.2	84.243	105.673	0.283037	0.00422333	NP_001234493.1|4.5e-198|spermidine synthase [Solanum lycopersicum]
Solyc05g056490.2	21.8	27.343	0.282604	0.0400123	XP_004239634.1|7.7e-224|SAL1 phosphatase [Solanum lycopersicum]
Solyc11g012080.1	258.186	331.473	0.281399	0.0386778	XP_004250251.1|3.0e-58|mitochondrial pyruvate carrier 4 [Solanum lycopersicum]
Solyc06g071550.2	29.43	36.866	0.28027	0.0305995	XP_004241508.1|3.8e-223|anthranilate phosphoribosyltransferase, chloroplastic [Solanum lycopersicum]
Solyc06g082650.2	246.35	309.12	0.280179	0.0428753	XP_009609933.1|8.0e-95|PREDICTED: 60S ribosomal protein L10 [Nicotiana tomentosiformis]
Solyc02g077740.2	62.94	79.05	0.279496	0.0386402	XP_004232914.1|3.4e-83|uncharacterized protein At4g28440 [Solanum lycopersicum]
Solyc06g060080.2	219.893	278.313	0.279385	0.0214349	XP_010322939.1|1.0e-25|uncharacterized protein LOC101266038 [Solanum lycopersicum]
Solyc03g078290.2	128.863	161.83	0.279275	0.0147959	XP_004235074.1|3.2e-81|40S ribosomal protein S18 [Solanum lycopersicum]
Solyc02g077220.2	58.38	73.116	0.277651	0.0153131	XP_004232954.1|3.0e-136|GDSL esterase/lipase At5g45920 [Solanum lycopersicum]
Solyc03g114340.2	31.95	39.863	0.276139	0.0181761	NP_001234553.2|3.5e-273|1-deoxy-D-xylulose-5-phosphate reductoisomerase [Solanum lycopersicum]
Solyc03g122270.2	22.846	28.56	0.276131	0.0230031	XP_004235553.1|0.0e+00|uncharacterized protein LOC101253877 isoform X1 [Solanum lycopersicum]
Solyc04g016260.2	37.076	46.183	0.276108	0.0198219	XP_010319169.1|0.0e+00|putative calcium-transporting ATPase 11, plasma membrane-type [Solanum lycopersicum]
Solyc08g066110.2	149.913	187.9	0.275775	0.0224951	NP_001233973.1|7.7e-71|profilin-2 [Solanum lycopersicum]
Solyc01g006280.2	62.896	78.263	0.275611	0.00343401	XP_004228600.1|0.0e+00|formate--tetrahydrofolate ligase [Solanum lycopersicum]
Solyc06g074300.2	252.626	315.373	0.274244	0.0142367	XP_004241322.1|1.1e-116|60S ribosomal protein L10a-1 [Solanum lycopersicum]
Solyc08g006500.2	29.963	37.283	0.274116	0.0313174	XP_004244494.1|0.0e+00|glutamate receptor 2.8 [Solanum lycopersicum]
Solyc05g009700.2	28.033	34.91	0.273457	0.0359194	XP_016548834.1|3.5e-248|PREDICTED: lysine histidine transporter-like 6 [Capsicum annuum]
Solyc01g066520.2	24.586	30.633	0.273375	0.0485855	XP_004229256.1|1.3e-289|lipoamide acyltransferase component of branched-chain alpha-keto acid dehydrogenase complex, mitochondrial [Solanum lycopersicum]
Solyc06g073630.2	29.76	36.986	0.271588	0.0184082	XP_004241379.1|0.0e+00|cyclin-dependent kinase C-2 isoform X2 [Solanum lycopersicum]
Solyc04g072240.2	26.216	32.63	0.271382	0.048853	PHT50586.1|4.8e-188|hypothetical protein CQW23_10333 [Capsicum baccatum]
Solyc01g102390.2	226.226	282.366	0.270339	0.0440727	XP_004230374.2|7.9e-119|germin-like protein 5-1 [Solanum lycopersicum]
Solyc07g005760.2	39.886	49.546	0.269694	0.0197529	NP_001234850.2|6.1e-253|hydroxycinnamoyl CoA quinate transferase [Solanum lycopersicum]
Solyc10g052660.1	376.496	472.876	0.269583	0.0358472	NP_001234180.1|2.2e-53|40S ribosomal protein S25 [Solanum lycopersicum]
Solyc06g083530.2	73.456	91.346	0.269143	0.0216039	NP_001335401.1|1.3e-121|vesicle-associated membrane protein [Solanum lycopersicum]
Solyc04g080940.2	101.213	125.7	0.268803	0.0492674	XP_004238311.1|1.1e-219|protein WALLS ARE THIN 1 [Solanum lycopersicum]
Solyc02g090450.2	143.073	177.846	0.268184	0.00907209	XP_004233638.1|3.0e-191|peroxidase 10-like [Solanum lycopersicum]
Solyc06g074490.1	307.613	384.64	0.267455	0.033304
Solyc09g010440.2	172.736	214.996	0.267407	0.0168456	XP_004246462.1|7.1e-74|actin-depolymerizing factor 1 [Solanum lycopersicum]
Solyc06g005420.1	347.42	438.366	0.267363	0.01781	PHT46786.1|3.4e-51|Histone H4 [Capsicum baccatum]
Solyc05g005560.2	54.316	67.273	0.267206	0.0383537	NP_001234835.1|0.0e+00|polygalacturonase-1 non-catalytic subunit beta precursor [Solanum lycopersicum]
Solyc04g076090.2	68.456	84.72	0.267064	0.00554297	NP_001234583.2|0.0e+00|glucose-6-phosphate isomerase 1 [Solanum lycopersicum]
Solyc06g073720.1	42.906	53.173	0.266948	0.0261753	NP_001234541.1|0.0e+00|protein ETHYLENE INSENSITIVE 3-Like 1 [Solanum lycopersicum]
Solyc01g081430.2	7.55	9.42	0.266766	0.0423483	XP_010323387.1|0.0e+00|uncharacterized protein LOC101254835 isoform X1 [Solanum lycopersicum]
Solyc08g082120.2	673.626	836.47	0.265814	0.0361501	XP_004245528.1|2.0e-148|hornerin [Solanum lycopersicum]
Solyc02g062250.2	51.336	63.68	0.263809	0.0349781	XP_016499064.1|6.1e-70|PREDICTED: peptidyl-prolyl cis-trans isomerase Pin1-like [Nicotiana tabacum]
Solyc06g008170.2	265.573	332.756	0.261821	0.00504031	NP_001274965.1|1.8e-74|ribosomal protein L17-like protein [Solanum tuberosum]
Solyc01g110450.2	58.473	72.216	0.260817	0.0452386	XP_010315337.1|3.9e-178|NADP-dependent D-sorbitol-6-phosphate dehydrogenase [Solanum lycopersicum]
Solyc06g073280.2	81.393	100.386	0.260226	0.0219886	XP_011088019.1|5.7e-233|LL-diaminopimelate aminotransferase, chloroplastic [Sesamum indicum]
Solyc09g007700.2	69.986	86.293	0.260044	0.0390424	XP_004246663.1|2.3e-218|probable E3 ubiquitin-protein ligase LOG2 [Solanum lycopersicum]
Solyc07g007600.2	170.276	209.61	0.260001	0.0192525	XP_015081996.1|0.0e+00|pyrophosphate-energized vacuolar membrane proton pump [Solanum pennellii]
Solyc06g074110.2	22.11	27.206	0.259713	0.029251	XP_004242114.1|0.0e+00|transcription factor LHW isoform X1 [Solanum lycopersicum]
Solyc04g079200.2	61.123	75.476	0.259328	0.0337937	XP_004238174.1|1.2e-176|26S proteasome non-ATPase regulatory subunit 14 homolog [Solanum lycopersicum]
Solyc01g094200.2	39.18	48.236	0.258659	0.0166754	XP_010326183.1|0.0e+00|NAD-dependent malic enzyme 59 kDa isoform, mitochondrial [Solanum lycopersicum]
Solyc02g062600.2	82.11	101.296	0.258233	0.017931	NP_001297049.1|2.1e-150|gamma carbonic anhydrase 1, mitochondrial [Solanum lycopersicum]
Solyc02g088460.2	67.283	82.973	0.258163	0.0116563	XP_004232192.1|1.9e-181|chorismate mutase 1, chloroplastic [Solanum lycopersicum]
Solyc12g014210.1	34.616	44.056	0.258153	0.0451961	XP_004251889.1|3.0e-133|UBP1-associated protein 2C-like [Solanum lycopersicum]
Solyc02g068450.2	142.08	175.706	0.258016	0.0283203	XP_004233261.1|8.9e-57|V-type proton ATPase subunit F [Solanum lycopersicum]
Solyc05g050850.2	140.276	173.873	0.257959	0.018261
Solyc08g083040.2	25.163	30.953	0.257815	0.0275423	XP_010325326.1|0.0e+00|serine/threonine-protein kinase fray2 isoform X3 [Solanum lycopersicum]
Solyc09g065720.2	24.493	30.113	0.256993	0.0320011	XP_004247203.1|0.0e+00|peptidyl-prolyl cis-trans isomerase CYP63 [Solanum lycopersicum]
Solyc09g065120.2	17.86	21.943	0.256482	0.0426769	XP_019071209.1|0.0e+00|preprotein translocase subunit SCY2, chloroplastic isoform X1 [Solanum lycopersicum]
Solyc06g073900.2	101.246	125.153	0.256396	0.0266882	XP_004241358.1|4.6e-82|succinate dehydrogenase subunit 6, mitochondrial [Solanum lycopersicum]
Solyc07g064270.2	141.11	173.27	0.254984	0.00235044	XP_004244144.1|3.0e-222|glucose-6-phosphate/phosphate translocator 1, chloroplastic [Solanum lycopersicum]
Solyc07g008840.2	35.306	43.316	0.254536	0.0342679	XP_004242821.1|0.0e+00|uncharacterized protein LOC101260951 [Solanum lycopersicum]
Solyc08g029110.2	39.623	48.746	0.254519	0.0476534	XP_004244896.1|8.3e-168|protein MEMO1 [Solanum lycopersicum]
Solyc02g064730.2	408.233	504.97	0.254398	0.019934	XP_004233452.1|2.6e-38|uncharacterized protein At2g23090 [Solanum lycopersicum]
Solyc11g068540.1	86.936	107.163	0.253645	0.0187018	NP_001234385.1|7.0e-174|N-carbamoylputrescine amidase [Solanum lycopersicum]
Solyc12g010060.1	466.616	550.52	0.253457	0.0073172	NP_001234715.1|1.2e-87|eukaryotic translation initiation factor 5A-4 [Solanum lycopersicum]
Solyc10g050890.1	368.83	452.333	0.253019	0.00224825	XP_004248736.1|0.0e+00|ferredoxin--nitrite reductase, chloroplastic [Solanum lycopersicum]
Solyc10g050430.1	108.63	133.873	0.252874	0.028532	XP_004248750.1|5.1e-169|transmembrane protein 45B [Solanum lycopersicum]
Solyc06g072030.1	221.576	273.98	0.252673	0.0127302
Solyc04g081570.2	236.526	289.513	0.251281	0.0419124	XP_004238368.1|0.0e+00|endoplasmin homolog [Solanum lycopersicum]
Solyc06g050590.2	65.566	80.433	0.250684	0.0494644	XP_004240889.1|6.9e-162|uncharacterized protein LOC101263617 [Solanum lycopersicum]
Solyc08g077510.2	52.743	64.66	0.249599	0.0244696	XP_004245847.1|1.1e-253|poly(U)-specific endoribonuclease-B isoform X2 [Solanum lycopersicum]
Solyc05g013440.2	71.433	87.286	0.249393	0.0210946	XP_015076172.1|0.0e+00|uncharacterized protein LOC107020357 [Solanum pennellii]
Solyc01g107550.2	88.393	108.303	0.249031	0.0218463	XP_019236761.1|1.2e-230|PREDICTED: methylthioribose kinase [Nicotiana attenuata]
Solyc03g119090.2	24.786	30.313	0.248647	0.0349056	XP_027124788.1|7.5e-310|actin-interacting protein 1-2 [Coffea arabica]
Solyc10g007350.2	178.38	219.613	0.248422	0.0236144	NP_001275251.1|6.3e-69|multiprotein bridging factor 1 [Solanum tuberosum]
Solyc12g099560.1	35.323	43.243	0.248324	0.0498878	XP_004252900.1|9.9e-301|probable histone-arginine methyltransferase 1.3 [Solanum lycopersicum]
Solyc04g008520.2	34.276	41.96	0.247984	0.0453224	XP_004236894.1|5.8e-194|outer envelope pore protein 37, chloroplastic [Solanum lycopersicum]
Solyc07g053690.2	60.283	73.976	0.246874	0.0447325	XP_004243375.1|3.2e-81|uncharacterized protein At4g28440 [Solanum lycopersicum]
Solyc06g063140.2	144.47	176.39	0.245909	0.014901	XP_004241865.1|1.8e-247|26S proteasome regulatory subunit 7 homolog A [Solanum lycopersicum]
Solyc02g078210.2	101.213	125.29	0.245774	0.00428386	XP_004232877.1|0.0e+00|probable ubiquitin-conjugating enzyme E2 24 [Solanum lycopersicum]
Solyc04g074550.2	151.163	184.893	0.243594	0.01298	XP_004237938.1|1.7e-101|cytochrome c oxidase subunit 6b-1 [Solanum lycopersicum]
Solyc06g063070.2	183.473	223.42	0.242455	0.041722	NP_001234513.1|8.9e-217|transcription factor JERF1 [Solanum lycopersicum]
Solyc03g112850.2	307.706	377.15	0.241997	0.0482321	XP_006343505.1|1.8e-62|PREDICTED: 60S ribosomal protein L44-like, partial [Solanum tuberosum]
Solyc02g070360.2	211.473	257.996	0.241697	0.0374856	XP_004233133.1|1.6e-148|40S ribosomal protein S4 [Solanum lycopersicum]
Solyc01g005560.2	443.756	540.04	0.241044	0.00332312	XP_004228607.1|4.7e-242|isocitrate dehydrogenase [NADP] [Solanum lycopersicum]
Solyc07g017780.2	735.56	893.816	0.240995	0.015838	XP_019177940.1|0.0e+00|PREDICTED: plasma membrane ATPase 4 isoform X1 [Ipomoea nil]
Solyc09g009890.2	47.103	57.28	0.240243	0.0446207	XP_006341104.1|7.2e-278|PREDICTED: heterogeneous nuclear ribonucleoprotein R [Solanum tuberosum]
Solyc06g049080.2	164.256	200.336	0.239381	0.00895524	NP_001317550.1|7.0e-132|Mn-superoxide dismutase [Solanum lycopersicum]
Solyc08g079070.2	73.593	89.376	0.238191	0.0281319	NP_001234076.2|8.8e-225|transaldolase ToTAL2 [Solanum lycopersicum]
Solyc09g075010.2	193.526	234.61	0.237206	0.0222575	XP_004247428.1|1.6e-130|uncharacterized protein OsI_027940 [Solanum lycopersicum]
Solyc10g007180.2	58.05	70.44	0.236977	0.0376936	XP_004248249.1|2.2e-239|multiple organellar RNA editing factor 8, chloroplastic/mitochondrial [Solanum lycopersicum]
Solyc06g072660.2	50.806	61.576	0.233262	0.0163264	XP_004241450.1|1.4e-294|protein DEK isoform X4 [Solanum lycopersicum]
Solyc04g054710.2	97.55	118.05	0.233235	0.0158797	NP_001234609.1|5.8e-270|prephenate aminotransferase [Solanum lycopersicum]
Solyc02g090940.2	68.723	83.18	0.232477	0.0249201	XP_004232025.1|2.4e-289|uncharacterized protein LOC101267075 [Solanum lycopersicum]
Solyc12g057110.2	59.713	72.21	0.231119	0.0470837	NP_001296299.1|1.6e-138|14-3-3 protein 2 [Solanum lycopersicum]
Solyc06g082910.2	30.886	37.223	0.229623	0.040139	XP_004242448.1|0.0e+00|formin-like protein 1 [Solanum lycopersicum]
Solyc01g005550.2	82.85	99.82	0.227276	0.023324	XP_010316339.1|1.1e-256|uncharacterized protein LOC101253614 [Solanum lycopersicum]
Solyc09g009260.2	440.09	530.57	0.226513	0.0128947	NP_001308301.1|2.2e-203|fructose-1,6-bisphosphate aldolase [Solanum lycopersicum]
Solyc01g103050.2	55.34	66.45	0.224583	0.0287626	NP_001234871.2|0.0e+00|auxin response factor 1 [Solanum lycopersicum]
Solyc02g092270.2	306.693	370.773	0.224556	0.0439953	XP_004231932.1|1.1e-85|NADH dehydrogenase [ubiquinone] iron-sulfur protein 4, mitochondrial [Solanum lycopersicum]
Solyc09g092330.1	112.966	135.913	0.223404	0.030518	XP_015088084.1|1.5e-257|UDP-glucuronate 4-epimerase 6 [Solanum pennellii]
Solyc02g087240.2	122.313	146.916	0.222254	0.0378059	XP_004232268.1|2.4e-291|NADH dehydrogenase [ubiquinone] flavoprotein 1, mitochondrial [Solanum lycopersicum]
Solyc10g007260.2	104.756	126.35	0.221591	0.0457312	XP_007021721.1|2.7e-82|PREDICTED: ubiquitin-conjugating enzyme E2 36 [Theobroma cacao]
Solyc08g077780.2	143.726	172.23	0.217977	0.0203699	XP_004245833.1|1.0e-193|serine/threonine-protein kinase SAPK3 [Solanum lycopersicum]
Solyc02g094190.2	70.313	84.016	0.215715	0.0336094	XP_004231775.1|0.0e+00|protein NUCLEAR FUSION DEFECTIVE 4 [Solanum lycopersicum]
BGI_novel_G000238	177.996	213.973	0.215108	0.0373035
Solyc01g108860.2	890.016	1064.74	0.214752	0.0152331	XP_004230828.1|2.5e-207|protein DMR6-LIKE OXYGENASE 2 [Solanum lycopersicum]
Solyc07g065490.2	113.33	135.146	0.214267	0.0354175	XP_004244042.1|0.0e+00|protein DEK [Solanum lycopersicum]
Solyc11g013810.1	438.47	522.623	0.213926	0.0236409	NP_001315427.1|0.0e+00|nitrate reductase [NADH] [Solanum lycopersicum]
Solyc09g007180.2	104.53	124.543	0.208847	0.0343022	XP_004246709.1|1.5e-153|adenylate kinase [Solanum lycopersicum]
Solyc08g013730.2	516.136	612.96	0.206291	0.0246763	NP_001274288.1|1.5e-164|probable aquaporin NIP5-1-like [Solanum lycopersicum]
Solyc09g092380.2	613.066	722.936	0.202704	0.0143312	NP_001234012.2|1.4e-282|adenosylhomocysteinase [Solanum lycopersicum]
Solyc05g052140.2	153.603	182.433	0.201185	0.0482321	XP_009620706.1|2.4e-34|PREDICTED: ATP synthase subunit delta', mitochondrial [Nicotiana tomentosiformis]
Solyc07g008720.2	518.226	615.286	0.199814	0.020605	NP_001234229.2|1.9e-84|BTF3-like transcription factor [Solanum lycopersicum]
Solyc04g082200.2	962.776	1122.54	0.17635	0.0473912	NP_001316365.1|2.0e-112|dehydrin [Solanum lycopersicum]
