# Supplementary material for: Comparative Physiological and Transcriptomic Analyses Reveal Altered Fe-Deficiency Responses in Tomato Epimutant Colorless Non-ripening
Source: Front Plant Sci. 2022 Jan 21;12:796893. doi: 10.3389/fpls.2021.796893 (PMC8813752; doi:10.3389/fpls.2021.796893)
Supplement: Supplementary file 14 [file Table_8.xlsx]

## Sheet: Down-regulated DEGs in Cnr root
Table S8. Down-regulated DEGs in Cnr roots under Fe deficiency condition.
Gene ID	Cnr+Fe FPKM	Cnr-Fe FPKM	Log2 (Cnr-Fe/Cnr+Fe)	Qvalue (Cnr+Fe-vs-Cnr-Fe)	Nr
Solyc01g008970.2	152.426	130.763	-0.186044	0.0328149	XP_015055739.1|1.6e-202|UBP1-associated protein 2A-like [Solanum pennellii]
Solyc05g053830.2	69.75	62.64	-0.192546	0.0489391	XP_004239847.1|0.0e+00|protein transport protein SEC23 [Solanum lycopersicum]
Solyc03g078400.2	848.02	762.693	-0.193312	0.0497684	XP_016550628.1|1.2e-216|PREDICTED: actin-7-like [Capsicum annuum]
Solyc01g010580.2	402.366	361.71	-0.19741	0.0474341	XP_004228395.1|4.7e-107|40S ribosomal protein S9-2 [Solanum lycopersicum]
Solyc03g097900.2	696.653	625.04	-0.198594	0.0168895	XP_004235324.1|4.5e-144|40S ribosomal protein S3a [Solanum lycopersicum]
Solyc01g102580.2	177.536	158.596	-0.201258	0.0211056	NP_001233943.1|0.0e+00|endo-1,4-beta-glucanase [Solanum lycopersicum]
Solyc07g005940.2	130.29	116.393	-0.201947	0.0312128	XP_004242619.1|2.1e-257|V-type proton ATPase subunit H [Solanum lycopersicum]
Solyc08g079170.2	227.37	202.753	-0.204729	0.0343843	XP_004245731.1|0.0e+00|hsp70-Hsp90 organizing protein 2 [Solanum lycopersicum]
Solyc01g109360.2	104.696	93.016	-0.204739	0.0373732	XP_004230889.1|9.2e-228|tyrosine--tRNA ligase 1, cytoplasmic [Solanum lycopersicum]
Solyc01g112350.2	31.59	28.83	-0.205171	0.0429834	XP_004231109.1|0.0e+00|brefeldin A-inhibited guanine nucleotide-exchange protein 1 [Solanum lycopersicum]
Solyc12g010040.1	173.576	154.813	-0.20541	0.0370015	XP_015165363.1|0.0e+00|PREDICTED: leucine aminopeptidase 2, chloroplastic isoform X2 [Solanum tuberosum]
Solyc01g049890.2	284.563	253.803	-0.207151	0.0418122	XP_004228970.1|6.2e-153|uncharacterized protein LOC101267442 [Solanum lycopersicum]
Solyc06g062590.2	67.543	60.07	-0.207595	0.0438366	XP_019260765.1|0.0e+00|PREDICTED: transmembrane 9 superfamily member 7-like [Nicotiana attenuata]
Solyc04g071990.2	94.756	84.143	-0.207686	0.0380173	XP_004237832.1|0.0e+00|protein GIGANTEA [Solanum lycopersicum]
Solyc03g031720.2	120.84	107.41	-0.208847	0.0412961	XP_004234481.1|6.1e-241|polyadenylate-binding protein RBP45 [Solanum lycopersicum]
Solyc01g099770.2	4900.24	4371.59	-0.210579	0.0204801	NP_001234566.2|1.5e-91|translationally-controlled tumor protein homolog [Solanum lycopersicum]
Solyc01g104170.2	451.72	401.703	-0.211443	0.0281843	XP_004230497.1|1.1e-194|ankyrin repeat domain-containing protein 2B [Solanum lycopersicum]
Solyc09g098540.2	387.036	343.593	-0.212122	0.0419124	XP_004247978.1|8.4e-193|chitinase-like protein 1 [Solanum lycopersicum]
Solyc07g063100.2	223.536	198.163	-0.212731	0.0146977	XP_004244233.1|0.0e+00|proton pump-interactor 1 [Solanum lycopersicum]
Solyc08g081410.2	42.106	37.193	-0.216588	0.0440042	XP_004245575.1|0.0e+00|golgin candidate 6 [Solanum lycopersicum]
Solyc01g102880.1	38.943	33.323	-0.216875	0.0380238	XP_010314215.1|0.0e+00|TMV resistance protein N-like [Solanum lycopersicum]
Solyc12g009960.1	99.946	88.303	-0.216918	0.0304872	XP_004251742.1|0.0e+00|eukaryotic translation initiation factor isoform X1 [Solanum lycopersicum]
Solyc01g067390.2	64.256	56.723	-0.217023	0.0387116	XP_004229214.1|0.0e+00|ISWI chromatin-remodeling complex ATPase CHR11 [Solanum lycopersicum]
Solyc12g088290.1	74.5	65.726	-0.218064	0.042832	XP_004252735.1|0.0e+00|WD repeat-containing protein PCN [Solanum lycopersicum]
Solyc03g113390.2	117.473	103.716	-0.218438	0.0368283	PIN10320.1|1.6e-280|Ca2+/calmodulin-dependent protein kinase, EF-Hand protein superfamily [Handroanthus impetiginosus]
Solyc02g070880.1	56.77	49.903	-0.219088	0.0438366	XP_004233098.1|2.7e-139|transcription factor bHLH144 [Solanum lycopersicum]
Solyc03g082940.2	57.67	50.816	-0.219376	0.0447498	XP_015069763.1|0.0e+00|importin subunit beta-1 [Solanum pennellii]
Solyc01g110120.2	210.746	185.673	-0.220532	0.0107049	PHT59072.1|0.0e+00|V-type proton ATPase subunit a3 [Capsicum baccatum]
Solyc01g107880.2	62.3	54.813	-0.221387	0.0315125	XP_010315222.1|0.0e+00|probable E3 ubiquitin ligase SUD1 isoform X1 [Solanum lycopersicum]
Solyc08g041770.2	99.506	87.703	-0.222472	0.0258557	XP_004244939.1|9.6e-216|hydroxyproline O-arabinosyltransferase 1 [Solanum lycopersicum]
Solyc09g090270.2	22.84	20.04	-0.224423	0.043084	XP_010326768.1|0.0e+00|COP1-interacting protein 7 [Solanum lycopersicum]
Solyc03g117040.2	61.93	54.423	-0.22454	0.0264655	XP_004235934.1|0.0e+00|factor of DNA methylation 1 [Solanum lycopersicum]
Solyc01g079250.2	163.99	144.06	-0.224862	0.0158747	XP_004229376.1|0.0e+00|probable pre-mRNA-splicing factor ATP-dependent RNA helicase DEAH2 [Solanum lycopersicum]
Solyc01g099790.2	76.516	67.266	-0.224947	0.0405769	NP_001307342.1|1.4e-259|E3 ubiquitin ligase AdBiL [Solanum lycopersicum]
Solyc10g009070.2	29.67	26.01	-0.22715	0.0437559	XP_004248109.1|0.0e+00|putative DEAD-box ATP-dependent RNA helicase 29 [Solanum lycopersicum]
Solyc04g015680.2	116.41	101.966	-0.228256	0.0493216	XP_009624141.1|0.0e+00|PREDICTED: insulin-degrading enzyme-like 1, peroxisomal [Nicotiana tomentosiformis]
Solyc01g109520.2	203.48	178.88	-0.229148	0.0313853	NP_001274838.1|6.7e-115|uncharacterized protein LOC102577689 [Solanum tuberosum]
Solyc01g088100.2	66.65	58.403	-0.229269	0.014742	XP_004229683.1|0.0e+00|zinc finger CCCH domain-containing protein 53 isoform X2 [Solanum lycopersicum]
Solyc02g078260.2	47.696	41.71	-0.229834	0.0269713	NP_001233889.1|0.0e+00|DNA-directed RNA polymerase II subunit RPB2 [Solanum lycopersicum]
Solyc03g044000.1	457.043	406.486	-0.229844	0.036381	XP_004234648.1|6.2e-75|60S ribosomal protein L26-1 [Solanum lycopersicum]
Solyc03g083390.2	149.956	130.653	-0.230131	0.0235337	XP_004234959.1|4.6e-169|protein BOBBER 1 [Solanum lycopersicum]
Solyc03g123910.2	111.753	97.906	-0.230254	0.0482422	XP_006342862.1|1.0e-236|PREDICTED: kelch repeat-containing protein At3g27220-like [Solanum tuberosum]
Solyc09g076040.2	67.86	59.433	-0.230391	0.0370239	XP_004247355.1|0.0e+00|uncharacterized protein LOC101252627 [Solanum lycopersicum]
Solyc05g054710.2	70.19	61.443	-0.230644	0.0411426	NP_001234613.2|0.0e+00|beta-hexosaminidase 2 [Solanum lycopersicum]
Solyc06g064460.2	143.896	126.38	-0.230705	0.0173502	XP_004241894.1|7.4e-143|60S ribosomal protein L7a-2-like [Solanum lycopersicum]
Solyc06g075590.2	48.823	43.26	-0.230981	0.0275423	XP_015079402.1|0.0e+00|probable NOT transcription complex subunit VIP2 isoform X4 [Solanum pennellii]
Solyc05g023740.2	62.256	54.393	-0.232123	0.0380061	NP_001234547.1|0.0e+00|mei2-like protein isoform 2 [Solanum lycopersicum]
Solyc09g010370.2	264.36	231.833	-0.232673	0.0266761	XP_004246471.1|1.8e-117|ras-related protein RABE1a isoform X1 [Solanum lycopersicum]
Solyc03g123840.2	79.196	66.433	-0.233817	0.0482321	NP_001335295.1|6.1e-175|RNA-binding protein with multiple splicing 2 [Solanum lycopersicum]
Solyc12g096540.1	490.113	430.176	-0.235409	0.0290784	XP_004253050.1|1.9e-105|40S ribosomal protein S10-1 [Solanum lycopersicum]
Solyc08g077430.2	20.803	18.143	-0.23758	0.0240095	XP_025888180.1|0.0e+00|uncharacterized protein LOC101256905 isoform X3 [Solanum lycopersicum]
Solyc08g081580.2	119.453	104.02	-0.23806	0.0420183	XP_010325384.1|1.4e-206|PIN2/TERF1-interacting telomerase inhibitor 1 isoform X2 [Solanum lycopersicum]
Solyc02g081400.2	56.41	49.813	-0.238498	0.0482422	XP_004232663.1|2.2e-228|protein DJ-1 homolog D [Solanum lycopersicum]
Solyc08g077240.2	121.633	105.83	-0.239439	0.00670579	XP_004245869.1|0.0e+00|probable methyltransferase PMT14 [Solanum lycopersicum]
Solyc11g008580.1	85.376	74.293	-0.239668	0.0428786	XP_004250070.1|0.0e+00|probable E3 ubiquitin-protein ligase ARI8 [Solanum lycopersicum]
Solyc11g007960.1	60.033	52.256	-0.239776	0.0305439	XP_004250024.1|1.7e-281|acyl-CoA-binding domain-containing protein 4 [Solanum lycopersicum]
Solyc04g054320.2	80.56	70.04	-0.240214	0.0497402	NP_001234614.1|5.2e-209|leucine-zipper transcription factor [Solanum lycopersicum]
Solyc08g006110.2	101.333	88.213	-0.240466	0.0114754	XP_004244469.1|2.0e-202|bZIP transcription factor RISBZ4 [Solanum lycopersicum]
Solyc06g008040.2	23.043	19.97	-0.242331	0.0249301	XP_004240469.1|0.0e+00|CLIP-associated protein-like [Solanum lycopersicum]
Solyc06g035970.2	217.213	188.74	-0.242817	0.00353678	XP_015079149.1|3.5e-264|tubulin beta-1 chain-like [Solanum pennellii]
Solyc01g100870.2	566.2	492.816	-0.244025	0.0133722	SPT17786.1|1.7e-86|unnamed protein product [Triticum aestivum]
Solyc01g090230.2	55.82	48.406	-0.244083	0.0421743	XP_004229745.1|0.0e+00|protein VASCULAR ASSOCIATED DEATH 1, chloroplastic [Solanum lycopersicum]
Solyc08g081900.2	34.003	29.436	-0.245536	0.0258743	NP_001353357.1|0.0e+00|translation initiation factor IF-2 [Solanum lycopersicum]
Solyc06g073060.2	47.64	41.293	-0.246039	0.0490552	XP_015077718.1|1.4e-245|IAA-amino acid hydrolase ILR1-like 5 [Solanum pennellii]
Solyc02g068490.2	103.696	89.713	-0.246079	0.0128716	XP_016477387.1|0.0e+00|PREDICTED: copper-transporting ATPase RAN1-like [Nicotiana tabacum]
Solyc08g005470.2	46.313	40.066	-0.246538	0.0327566	XP_010324487.1|1.5e-264|cyclin-dependent kinase F-4 isoform X1 [Solanum lycopersicum]
Solyc06g074980.2	226.713	195.853	-0.246648	0.0210919	XP_006347195.1|0.0e+00|PREDICTED: cell division cycle protein 48 homolog [Solanum tuberosum]
Solyc10g078290.1	40.333	35.57	-0.24685	0.0409923	XP_004249119.1|0.0e+00|bZIP transcription factor 17 [Solanum lycopersicum]
Solyc09g098360.2	163.16	142.963	-0.247358	0.0380238	XP_004247989.1|2.3e-147|ribosome biogenesis protein NSA2 homolog [Solanum lycopersicum]
Solyc08g080830.2	59.68	51.596	-0.247369	0.00887318	XP_004245618.1|0.0e+00|probable LRR receptor-like serine/threonine-protein kinase At1g63430 [Solanum lycopersicum]
Solyc01g100720.2	117.54	101.703	-0.248048	0.029251	XP_004230322.1|0.0e+00|importin subunit alpha-4 [Solanum lycopersicum]
Solyc03g111770.2	57.583	49.863	-0.248246	0.0472151	XP_004236297.1|1.4e-216|alpha/beta hydrolase domain-containing protein 17B [Solanum lycopersicum]
Solyc03g118390.2	51.013	43.966	-0.248745	0.0287494	XP_004235837.1|0.0e+00|coiled-coil domain-containing protein SCD2 isoform X1 [Solanum lycopersicum]
Solyc09g089790.2	66.736	57.75	-0.249259	0.0305474	XP_004247712.1|9.6e-207|1-aminocyclopropane-1-carboxylate oxidase homolog 1-like [Solanum lycopersicum]
Solyc01g098180.2	37.356	32.243	-0.249318	0.030518	XP_004230146.1|0.0e+00|translation initiation factor eIF-2B subunit epsilon [Solanum lycopersicum]
Solyc09g005310.2	76.446	66.06	-0.249414	0.00948827	XP_004246766.1|8.2e-292|LIMR family protein At5g01460 [Solanum lycopersicum]
Solyc06g054490.2	55.733	48.21	-0.25019	0.0349781	XP_004241065.1|9.0e-172|probable prolyl 4-hydroxylase 4 [Solanum lycopersicum]
Solyc03g117280.2	81.8	70.62	-0.250453	0.0400854	XP_004235915.1|2.3e-310|uncharacterized protein LOC101263891 [Solanum lycopersicum]
Solyc11g039840.1	498.126	432.49	-0.250587	0.00621941	NP_001275627.1|1.2e-148|cytochrome b-c1 complex subunit Rieske, mitochondrial [Solanum tuberosum]
Solyc11g013190.1	33.433	28.73	-0.250773	0.0420827	XP_004250338.1|0.0e+00|oxysterol-binding protein-related protein 1C-like isoform X1 [Solanum lycopersicum]
Solyc01g096700.2	224.706	194.45	-0.250984	0.00835675	NP_001332867.1|0.0e+00|gonidialess A/Zuotin related factor-like protein [Solanum lycopersicum]
Solyc02g089930.2	43.16	37.406	-0.251236	0.0353984	XP_004232088.1|0.0e+00|protein DA1-related 1 [Solanum lycopersicum]
Solyc09g055590.2	34.966	30.15	-0.252323	0.0427242	XP_010326256.1|7.8e-118|uncharacterized protein LOC101252625 [Solanum lycopersicum]
Solyc06g053330.2	35.973	30.993	-0.252492	0.0384499	XP_015077190.1|7.0e-241|DNA-directed RNA polymerase I subunit rpa49 [Solanum pennellii]
Solyc09g082520.2	181.57	170.796	-0.253634	0.0074003	XP_004247589.1|1.6e-144|40S ribosomal protein S3a [Solanum lycopersicum]
Solyc06g076360.2	70.136	60.35	-0.253776	0.00894107	XP_015079209.1|0.0e+00|protein TOC75-3, chloroplastic [Solanum pennellii]
Solyc04g015130.2	37.42	32.23	-0.253864	0.027846	XP_004236648.1|0.0e+00|serine/threonine-protein kinase D6PKL2 [Solanum lycopersicum]
Solyc06g068840.2	30.143	25.943	-0.25455	0.0368866	XP_016576348.1|3.0e-308|PREDICTED: uncharacterized protein LOC107873942 [Capsicum annuum]
Solyc02g087620.2	23.493	20.186	-0.254878	0.0289781	XP_004232245.1|0.0e+00|inositol hexakisphosphate and diphosphoinositol-pentakisphosphate kinase VIP2 isoform X2 [Solanum lycopersicum]
Solyc05g054830.2	52.02	44.706	-0.255689	0.0282534	XP_004239763.1|0.0e+00|ankyrin repeat-containing protein ITN1 [Solanum lycopersicum]
Solyc06g063000.2	108.31	93.246	-0.255703	0.0178963	XP_004241874.1|2.8e-245|oligouridylate-binding protein 1B isoform X1 [Solanum lycopersicum]
Solyc05g007810.2	43.57	37.066	-0.256146	0.0316942	XP_004238815.1|2.9e-304|KH domain-containing protein At4g18375 [Solanum lycopersicum]
Solyc07g052350.2	199.783	171.48	-0.256259	0.0178114	XP_006366590.1|0.0e+00|PREDICTED: aconitate hydratase, cytoplasmic [Solanum tuberosum]
Solyc08g077220.2	191.94	165.33	-0.256344	0.0132311	XP_004245872.1|3.5e-167|tobamovirus multiplication protein 2A [Solanum lycopersicum]
Solyc11g006880.1	49.993	42.97	-0.256362	0.0294333	XP_004249958.1|5.4e-83|uncharacterized protein LOC101265695 [Solanum lycopersicum]
Solyc11g008340.1	39.853	34.153	-0.256612	0.0146155	XP_004250052.1|0.0e+00|exocyst complex component SEC8 [Solanum lycopersicum]
Solyc06g035870.2	78.976	68.003	-0.257671	0.0158244	XP_004240738.1|4.5e-133|membrane steroid-binding protein 1 [Solanum lycopersicum]
Solyc10g079470.2	33.866	29.083	-0.257721	0.0437319	NP_001234603.2|0.0e+00|L-galactono-1,4-lactone dehydrogenase [Solanum lycopersicum]
Solyc04g082480.2	24.87	21.373	-0.25819	0.0206324	XP_004238434.1|0.0e+00|protein NLP4 isoform X1 [Solanum lycopersicum]
Solyc02g083390.2	78.526	67.563	-0.258676	0.0271101	XP_004232524.1|5.6e-149|probable prolyl 4-hydroxylase 10 [Solanum lycopersicum]
Solyc01g103080.2	30.943	26.496	-0.258755	0.028532	XP_004230417.1|0.0e+00|DExH-box ATP-dependent RNA helicase DExH9 [Solanum lycopersicum]
Solyc10g085970.1	58.126	49.89	-0.259221	0.0165678	XP_004249639.1|5.2e-101|protein MODIFIER OF SNC1 11 [Solanum lycopersicum]
Solyc05g052800.2	312.89	269.966	-0.259341	0.0192745	OTG18353.1|3.4e-53|putative ribosomal protein L35A, Translation protein, beta-barrel domain protein [Helianthus annuus]
Solyc05g007640.2	57.896	49.576	-0.26062	0.0166031	XP_004239390.2|0.0e+00|putative late blight resistance protein homolog R1C-3 [Solanum lycopersicum]
BGI_novel_G000336	35.843	30.65	-0.260751	0.0433477
Solyc04g078750.2	181.206	155.046	-0.261115	0.00470775	XP_004238140.1|5.5e-183|uncharacterized protein LOC101250111 isoform X1 [Solanum lycopersicum]
Solyc07g042160.2	42.286	36.223	-0.261287	0.0222649	PHU11690.1|2.1e-276|hypothetical protein BC332_18620 [Capsicum chinense]
Solyc06g007360.2	152.74	131.243	-0.261342	0.0142493	XP_004240421.1|3.3e-149|40S ribosomal protein S4 [Solanum lycopersicum]
Solyc02g037510.2	29.8	26.436	-0.261636	0.0283817	XP_004231631.1|0.0e+00|cationic amino acid transporter 4, vacuolar [Solanum lycopersicum]
Solyc10g081580.1	98.57	84.613	-0.262083	0.0191912	XP_004249381.1|1.3e-170|syntaxin-132 [Solanum lycopersicum]
Solyc03g113490.2	90.566	77.51	-0.262527	0.00376639	XP_010318956.1|0.0e+00|HIPL1 protein-like [Solanum lycopersicum]
Solyc05g007120.2	88.303	75.493	-0.26279	0.0173454	XP_015076566.1|0.0e+00|probable LRR receptor-like serine/threonine-protein kinase At1g14390 [Solanum pennellii]
Solyc04g077510.2	25.48	21.79	-0.262814	0.0467873	XP_004238069.1|0.0e+00|growth-regulating factor 1-like isoform X2 [Solanum lycopersicum]
Solyc07g063330.2	16.356	13.966	-0.263335	0.0478845	XP_004244210.1|0.0e+00|WD repeat-containing protein 44 isoform X2 [Solanum lycopersicum]
Solyc02g081300.2	26.466	22.62	-0.263746	0.0235706	XP_019172019.1|0.0e+00|PREDICTED: sucrose synthase 7-like [Ipomoea nil]
Solyc01g094920.2	73.143	62.58	-0.264264	0.00903617	XP_004229933.1|1.1e-276|probable receptor-like protein kinase At5g24010 [Solanum lycopersicum]
Solyc03g112070.2	70.876	60.56	-0.264624	0.0220168	XP_015070265.1|0.0e+00|D-3-phosphoglycerate dehydrogenase 3, chloroplastic-like [Solanum pennellii]
Solyc09g075730.2	42.493	36.33	-0.265183	0.0200752	XP_004247374.1|6.3e-304|probable LRR receptor-like serine/threonine-protein kinase At1g67720 [Solanum lycopersicum]
Solyc02g091190.2	107.723	92.216	-0.266089	0.0131573	XP_015067040.1|2.7e-198|EEF1A lysine methyltransferase 2 [Solanum pennellii]
Solyc11g006390.1	19.96	17.003	-0.266158	0.0325887	XP_025883908.1|0.0e+00|nuclear pore complex protein NUP1 isoform X2 [Solanum lycopersicum]
Solyc05g054370.2	36.136	30.823	-0.266292	0.0253964	XP_004239801.1|0.0e+00|probable acyl-CoA dehydrogenase IBR3 [Solanum lycopersicum]
Solyc05g014760.2	61.783	50.82	-0.266393	0.0179787	XP_010320985.1|0.0e+00|cyclin-dependent kinase G-2 isoform X1 [Solanum lycopersicum]
Solyc08g008050.2	307.063	262.78	-0.266985	0.0225621	NP_001289835.2|1.2e-164|probable aquaporin PIP-type pTOM75 [Solanum lycopersicum]
Solyc12g035130.1	580.41	481.253	-0.267313	0.0137372	XP_004252209.1|0.0e+00|ATP-dependent RNA helicase-like protein DB10 [Solanum lycopersicum]
Solyc07g063550.2	79.91	68.21	-0.267556	0.0272135	NP_001309328.1|6.5e-275|probable ADP-ribosylation factor GTPase-activating protein AGD5 isoform 1 [Solanum lycopersicum]
Solyc09g074460.1	126.186	107.763	-0.269166	0.0298298	XP_004247465.1|7.8e-223|E3 ubiquitin-protein ligase CIP8 [Solanum lycopersicum]
Solyc01g096670.2	115.96	98.91	-0.269453	0.0232416	XP_004230046.1|5.8e-305|cytochrome P450 98A2 [Solanum lycopersicum]
Solyc08g078610.2	33.306	28.696	-0.270037	0.0200752	XP_019070848.1|3.2e-251|uncharacterized protein LOC101256403 isoform X1 [Solanum lycopersicum]
Solyc01g088660.2	139.146	118.976	-0.270222	0.0215013	XP_004229715.1|1.2e-51|uncharacterized protein LOC101248137 [Solanum lycopersicum]
Solyc08g081990.2	12.423	10.566	-0.270519	0.0479189	XP_019070818.1|0.0e+00|protein SPA1-RELATED 2 isoform X1 [Solanum lycopersicum]
Solyc06g007980.2	132.12	112.453	-0.27089	0.00078731	XP_004240463.1|0.0e+00|sterol 3-beta-glucosyltransferase UGT80A2 isoform X2 [Solanum lycopersicum]
Solyc02g093060.2	35.636	30.333	-0.271161	0.0282041	NP_001333857.1|5.9e-232|tRNA-dihydrouridine synthase 1-like protein [Solanum lycopersicum]
Solyc09g082680.2	26.95	22.906	-0.271619	0.0216039	XP_004247601.1|0.0e+00|dymeclin [Solanum lycopersicum]
Solyc11g033270.1	46.286	39.276	-0.271787	0.0366757	NP_001234779.1|0.0e+00|MAP3K epsilon protein kinase [Solanum lycopersicum]
Solyc03g025230.2	54.226	46.116	-0.27189	0.0336388	XP_016564541.1|1.8e-258|PREDICTED: protein DETOXIFICATION 35-like [Capsicum annuum]
Solyc09g074400.2	67.79	57.696	-0.272114	0.00937325	XP_004247471.1|2.8e-210|protein CIA1 [Solanum lycopersicum]
Solyc02g076840.2	23.52	20.006	-0.272159	0.0152334	XP_004233023.1|0.0e+00|protein SCAR1 isoform X1 [Solanum lycopersicum]
Solyc12g017910.1	141.13	119.903	-0.272666	0.0328052	PHT89374.1|0.0e+00|Potassium transporter 4 [Capsicum annuum]
Solyc06g059760.2	25.466	21.616	-0.272983	0.0203121	NP_001352551.1|0.0e+00|transcriptional corepressor SEU1 [Solanum lycopersicum]
Solyc06g082930.2	133.94	113.736	-0.273371	0.0117436	XP_004242450.1|0.0e+00|FRIGIDA-like protein 3 [Solanum lycopersicum]
Solyc08g080110.2	28.89	24.52	-0.273444	0.0248957	XP_015085752.1|0.0e+00|ubiquitin carboxyl-terminal hydrolase MINDY-2 [Solanum pennellii]
Solyc01g087210.2	158.436	134.166	-0.275234	0.0180205	XP_004229630.1|0.0e+00|cellulose synthase A catalytic subunit 3 [UDP-forming] [Solanum lycopersicum]
Solyc01g059860.2	28.933	24.516	-0.275339	0.0483487	XP_004229011.1|0.0e+00|probable serine/threonine-protein kinase DDB_G0272254 [Solanum lycopersicum]
Solyc11g005920.1	38.6	32.946	-0.275367	0.0493337	XP_004249904.1|0.0e+00|NAC domain-containing protein 82 isoform X2 [Solanum lycopersicum]
Solyc12g035670.1	11.5	9.693	-0.275432	0.0341911	XP_004252222.1|0.0e+00|SAC3 family protein B isoform X2 [Solanum lycopersicum]
Solyc01g111780.2	52.68	44.64	-0.275516	0.00714173	XP_009792832.1|0.0e+00|PREDICTED: transportin-1-like [Nicotiana sylvestris]
Solyc04g056590.2	21.18	17.943	-0.27588	0.042783	XP_004237374.1|2.6e-283|aspartic proteinase-like protein 2 [Solanum lycopersicum]
Solyc08g044510.2	142.62	121.056	-0.276014	0.0296566	XP_004244958.1|6.2e-309|beta-glucosidase 13-like isoform X1 [Solanum lycopersicum]
Solyc05g054130.2	75.296	63.886	-0.276176	0.0354737	XP_004239825.1|4.0e-187|putative MO25-like protein At5g47540 [Solanum lycopersicum]
Solyc03g007870.2	122.59	104.29	-0.276417	0.00583237	XP_004234217.1|1.0e-88|heavy metal-associated isoprenylated plant protein 39 [Solanum lycopersicum]
Solyc07g062850.2	17.976	13.893	-0.276519	0.0247225	XP_004244250.1|2.8e-178|uncharacterized protein LOC101261434 [Solanum lycopersicum]
Solyc02g063450.2	605.313	512.883	-0.277049	0.00357057	XP_019067734.1|0.0e+00|glycine-rich domain-containing protein 2 isoform X2 [Solanum lycopersicum]
Solyc07g041970.2	214.853	181.963	-0.277095	0.00181428	XP_004243704.1|0.0e+00|subtilisin-like protease SBT1.8 [Solanum lycopersicum]
Solyc02g082540.2	48.683	41.17	-0.277168	0.0280189	XP_015065008.1|0.0e+00|actin cytoskeleton-regulatory complex protein PAN1-like [Solanum pennellii]
Solyc04g077480.2	39.686	34.01	-0.277948	0.0166874	XP_004238065.1|9.8e-222|transcription factor bHLH74 [Solanum lycopersicum]
Solyc03g118200.2	33.576	28.426	-0.278236	0.0195064	XP_004235846.1|0.0e+00|protein BONZAI 1-like isoform X1 [Solanum lycopersicum]
Solyc10g045620.1	30.063	25.426	-0.278365	0.0351159	XP_004248816.1|6.5e-160|protein RETICULATA-RELATED 1, chloroplastic [Solanum lycopersicum]
Solyc03g111590.2	18.433	15.613	-0.278488	0.0432814	XP_004236313.1|0.0e+00|lysine-specific demethylase REF6 [Solanum lycopersicum]
Solyc04g054480.2	76.59	65.636	-0.278568	0.0250351	XP_019177301.1|0.0e+00|PREDICTED: uncharacterized protein LOC109172574 isoform X1 [Ipomoea nil]
Solyc07g043260.2	17.18	14.466	-0.278767	0.0493337	XP_004243647.1|0.0e+00|protein FAR1-RELATED SEQUENCE 2 isoform X2 [Solanum lycopersicum]
Solyc07g065710.2	60.86	51.333	-0.27901	0.00404842	XP_004244035.1|0.0e+00|serine/threonine-protein kinase D6PK [Solanum lycopersicum]
Solyc12g089150.1	65.716	55.816	-0.279233	0.0383507	XP_004252790.1|9.7e-64|syntaxin-61 [Solanum lycopersicum]
Solyc05g052200.2	40.296	34.053	-0.279923	0.00477361	XP_010321457.2|0.0e+00|LOW QUALITY PROTEIN: probable inactive serine/threonine-protein kinase scy1 [Solanum lycopersicum]
Solyc10g078340.1	86.436	73.38	-0.280123	0.00707633	XP_004249124.1|4.1e-269|stomatal closure-related actin-binding protein 3 [Solanum lycopersicum]
Solyc00g007200.2	26.523	22.16	-0.280564	0.0298681	XP_010314898.1|0.0e+00|MLO-like protein 9 [Solanum lycopersicum]
Solyc03g053080.1	32.46	27.656	-0.280634	0.00359678	XP_019068404.1|0.0e+00|kinesin-like protein KIN-7K, chloroplastic isoform X3 [Solanum lycopersicum]
Solyc01g111120.2	86.146	72.85	-0.281864	0.00785174	XP_004230885.1|1.7e-182|triosephosphate isomerase, chloroplastic [Solanum lycopersicum]
Solyc10g076990.1	81.526	68.803	-0.281871	0.0494571	XP_004249094.1|0.0e+00|probable ADP-ribosylation factor GTPase-activating protein AGD14 isoform X1 [Solanum lycopersicum]
Solyc06g062860.2	32.37	27.32	-0.281896	0.0488701	XP_004241859.1|0.0e+00|polyadenylate-binding protein-interacting protein 4 isoform X2 [Solanum lycopersicum]
Solyc04g081210.2	91.21	76.973	-0.282212	0.00804753	XP_004238337.1|0.0e+00|protein IQ-DOMAIN 32 [Solanum lycopersicum]
Solyc10g084140.1	59.616	50.26	-0.282971	0.023324	XP_004249490.1|2.2e-278|ferrochelatase-2, chloroplastic isoform X1 [Solanum lycopersicum]
Solyc09g075090.1	87.153	73.836	-0.283056	0.0032098	XP_004247420.1|1.3e-143|serine/arginine-rich-splicing factor SR34 [Solanum lycopersicum]
Solyc01g006970.2	16.3	13.713	-0.284743	0.0271418	XP_015062765.1|0.0e+00|DExH-box ATP-dependent RNA helicase DExH1 isoform X1 [Solanum pennellii]
Solyc08g069030.2	78.946	66.566	-0.284854	0.00611249	XP_004245301.1|1.8e-247|delta-aminolevulinic acid dehydratase, chloroplastic [Solanum lycopersicum]
Solyc04g078990.2	33.346	28.093	-0.285057	0.0315754	XP_004238159.1|0.0e+00|UDP-glucuronate:xylan alpha-glucuronosyltransferase 2-like isoform X1 [Solanum lycopersicum]
Solyc09g015650.2	67.726	57.096	-0.28515	0.00538111	XP_004246287.1|6.6e-152|protein FATTY ACID EXPORT 3, chloroplastic [Solanum lycopersicum]
Solyc10g009180.2	108.853	91.866	-0.285305	0.0324659	XP_004248102.1|8.0e-177|secretory carrier-associated membrane protein 3 [Solanum lycopersicum]
Solyc07g065840.2	1753.29	1477.44	-0.285702	0.000325008	BAG16518.1|0.0e+00|putative Hsp90-2 [Capsicum chinense]
Solyc03g006130.2	27.82	23.39	-0.28612	0.038971	XP_004234089.1|0.0e+00|protein MALE DISCOVERER 2-like [Solanum lycopersicum]
Solyc04g076380.2	156.346	131.573	-0.286173	0.00262764	XP_004238001.1|0.0e+00|NADPH--cytochrome P450 reductase [Solanum lycopersicum]
Solyc08g082280.2	143.956	121.27	-0.2862	0.00302377	XP_009618994.1|0.0e+00|PREDICTED: long chain acyl-CoA synthetase 4-like [Nicotiana tomentosiformis]
Solyc03g123740.2	98.41	82.84	-0.28633	0.00252431	NP_001334606.1|0.0e+00|protein kinase superfamily protein precursor [Solanum lycopersicum]
Solyc03g082600.2	104.316	88.17	-0.287157	0.0115823	NP_001295127.1|5.7e-72|cytochrome b5 isoform A [Solanum lycopersicum]
Solyc01g065530.2	42.156	35.393	-0.288901	0.0154162	XP_004229282.1|0.0e+00|COBRA-like protein 7 [Solanum lycopersicum]
Solyc06g043030.2	17.486	14.673	-0.289005	0.02188	XP_004240827.1|0.0e+00|AP3-complex subunit beta-A isoform X1 [Solanum lycopersicum]
Solyc03g095780.1	174.923	148.36	-0.289335	0.0123554	XP_004235232.1|7.1e-114|abscisic acid receptor PYL4 [Solanum lycopersicum]
Solyc08g005570.2	20.77	17.153	-0.289609	0.0324328	XP_004244433.1|0.0e+00|protein root UVB sensitive 1, chloroplastic [Solanum lycopersicum]
Solyc04g080460.2	60.62	50.91	-0.289698	0.0483258	XP_015074384.1|2.0e-273|sugar transporter ERD6-like 6 [Solanum pennellii]
Solyc12g099000.1	139.276	117.05	-0.28981	0.0456541	NP_001296305.1|1.9e-232|S-adenosylmethionine synthase 2 [Solanum lycopersicum]
Solyc08g066730.2	24.396	20.443	-0.290714	0.0283817	XP_004245173.1|0.0e+00|N6-adenosine-methyltransferase MT-A70-like [Solanum lycopersicum]
Solyc12g044720.1	722.366	612.513	-0.290972	0.000331121	XP_015061581.1|2.5e-21|60S ribosomal protein L28-1-like [Solanum pennellii]
Solyc09g063030.2	37.09	31.083	-0.291158	0.00334365	XP_004247111.1|0.0e+00|CLIP-associated protein-like [Solanum lycopersicum]
Solyc01g104770.2	87.236	72.606	-0.291167	0.00330847	NP_001309932.1|4.0e-217|actin [Solanum lycopersicum]
Solyc01g068610.2	18.743	15.7	-0.291997	0.0227407	XP_004229153.1|0.0e+00|paladin [Solanum lycopersicum]
Solyc01g098700.2	26.456	22.263	-0.292172	0.0156506	XP_004230170.1|2.6e-303|branched-chain-amino-acid aminotransferase-like protein 1 [Solanum lycopersicum]
Solyc07g066520.2	43.973	36.88	-0.292464	0.0306021	XP_004243975.1|7.1e-200|uncharacterized protein At4g15545 isoform X1 [Solanum lycopersicum]
Solyc11g012140.1	66.526	55.683	-0.292508	0.00156928	XP_004250257.1|0.0e+00|isoleucine--tRNA ligase, cytoplasmic [Solanum lycopersicum]
Solyc04g010080.2	19.34	16.176	-0.293286	0.0313174	XP_004236779.1|0.0e+00|diphthine--ammonia ligase [Solanum lycopersicum]
Solyc03g112680.1	22.283	18.62	-0.29362	0.0438366	XP_004236228.1|0.0e+00|LRR receptor-like serine/threonine-protein kinase GSO1 [Solanum lycopersicum]
Solyc02g088760.2	54.243	45.48	-0.294671	0.0116685	XP_004232170.1|7.8e-109|uncharacterized protein LOC101262273 [Solanum lycopersicum]
Solyc05g041910.2	39.746	33.23	-0.29512	0.0313174	XP_004240164.1|2.0e-235|cytochrome b561 and DOMON domain-containing protein At5g47530 [Solanum lycopersicum]
Solyc05g053230.2	61.826	51.78	-0.295204	0.00448106	XP_010321417.1|5.7e-209|pto-interacting protein 1 isoform X1 [Solanum lycopersicum]
Solyc02g069780.2	16.656	14.14	-0.29521	0.0238664	XP_015065656.1|0.0e+00|serine/threonine-protein phosphatase 6 regulatory subunit 3 [Solanum pennellii]
Solyc03g119010.2	73.766	61.643	-0.295236	0.0302885	XP_004235801.1|1.1e-130|pre-mRNA-splicing factor SPF27 homolog [Solanum lycopersicum]
Solyc12g095960.1	282.043	237.116	-0.2955	0.00286499	XP_004253096.1|4.7e-159|far upstream element-binding protein 2 [Solanum lycopersicum]
Solyc03g122240.2	19.41	16.116	-0.295608	0.0300397	XP_004235556.1|0.0e+00|exocyst complex component EXO70A1 [Solanum lycopersicum]
Solyc08g008490.2	36.55	30.816	-0.295695	0.00704302	XP_004244644.1|0.0e+00|uncharacterized WD repeat-containing protein C3H5.08c isoform X1 [Solanum lycopersicum]
Solyc01g060030.2	81.483	68.56	-0.295895	0.013201	XP_004229003.1|5.0e-145|zinc finger CCHC domain-containing protein 10 [Solanum lycopersicum]
Solyc02g079880.2	59.786	49.943	-0.296829	0.0100317	XP_004232758.1|0.0e+00|uncharacterized protein LOC101266783 isoform X1 [Solanum lycopersicum]
Solyc11g069600.1	30.16	25.166	-0.296983	0.0224866	XP_004251151.1|0.0e+00|E3 ubiquitin-protein ligase WAV3 isoform X1 [Solanum lycopersicum]
Solyc06g062360.2	41.416	34.643	-0.29764	0.0210805	XP_004241954.1|6.0e-145|syntaxin-22 isoform X1 [Solanum lycopersicum]
Solyc02g069650.1	16.33	13.61	-0.297781	0.0265083	XP_010316977.1|0.0e+00|vacuolar protein sorting-associated protein 54, chloroplastic-like isoform X1 [Solanum lycopersicum]
Solyc01g091690.2	22.756	18.993	-0.297865	0.0351686	XP_009804054.1|0.0e+00|PREDICTED: probable methyltransferase PMT15 [Nicotiana sylvestris]
Solyc07g032090.2	84.356	70.67	-0.298008	0.0407785	XP_004243142.1|1.7e-150|transcription initiation factor IIF subunit beta [Solanum lycopersicum]
Solyc05g042030.2	102.113	85.426	-0.298769	0.0323541	XP_004240162.1|5.4e-126|chromatin remodeling protein EBS [Solanum lycopersicum]
Solyc12g011050.1	27.573	22.983	-0.298938	0.00993289	XP_004251817.1|0.0e+00|flowering time control protein FPA [Solanum lycopersicum]
Solyc10g008560.2	18.126	15.106	-0.298953	0.041722	XP_004248148.1|1.3e-295|protein root UVB sensitive 6 [Solanum lycopersicum]
Solyc10g078300.1	350.273	292.993	-0.299064	0.0360716	XP_004249122.1|1.1e-196|R3H domain-containing protein 2 [Solanum lycopersicum]
Solyc06g075250.2	36.106	30.11	-0.299374	0.0100935	XP_004241270.1|0.0e+00|protein indeterminate-domain 9 [Solanum lycopersicum]
Solyc09g008490.2	12.42	10.33	-0.299412	0.0157469	XP_015088375.1|0.0e+00|protein SHOOT GRAVITROPISM 6 isoform X1 [Solanum pennellii]
Solyc06g083390.2	141.96	118.73	-0.299448	0.0215675	XP_004242410.1|1.4e-148|RPM1-interacting protein 4 [Solanum lycopersicum]
Solyc04g082570.2	38.786	32.333	-0.299653	0.00566463	XP_016568243.1|0.0e+00|PREDICTED: U-box domain-containing protein 44-like [Capsicum annuum]
Solyc07g043320.2	162.35	135.186	-0.299929	0.00390768	XP_004243644.1|0.0e+00|myosin heavy chain, skeletal muscle [Solanum lycopersicum]
Solyc04g025880.2	16.493	13.73	-0.30001	0.0388711	XP_015071965.1|0.0e+00|potassium transporter 6-like [Solanum pennellii]
Solyc01g106320.2	127.73	106.52	-0.300064	0.0171128	XP_004230573.1|7.4e-295|uncharacterized protein LOC101252825 [Solanum lycopersicum]
Solyc01g097040.2	26.786	22.28	-0.300477	0.011732	XP_004230077.1|0.0e+00|myosin-binding protein 1-like isoform X1 [Solanum lycopersicum]
Solyc11g011960.1	198.183	164.77	-0.300545	0.000779182	XP_004250240.1|1.8e-272|UTP--glucose-1-phosphate uridylyltransferase [Solanum lycopersicum]
Solyc05g046000.2	134.85	112.66	-0.301512	0.00309001	XP_004240143.1|2.1e-183|peroxidase 27-like [Solanum lycopersicum]
Solyc05g005740.2	42.256	35.19	-0.301828	0.00984664	XP_004238679.1|0.0e+00|potassium transporter 6-like [Solanum lycopersicum]
Solyc08g060940.1	156.803	130.97	-0.302062	0.00495401	XP_004245028.1|3.8e-195|probable sugar phosphate/phosphate translocator At2g25520 [Solanum lycopersicum]
Solyc09g082970.2	97.543	81.173	-0.302233	0.00256081	XP_004247618.1|0.0e+00|pyruvate kinase isozyme A, chloroplastic [Solanum lycopersicum]
Solyc12g009890.1	53.133	44.276	-0.302802	0.00946704	XP_004251740.1|2.8e-259|V-type proton ATPase subunit H isoform X1 [Solanum lycopersicum]
Solyc11g065260.1	19.706	16.37	-0.302905	0.0162286	XP_004250914.1|0.0e+00|uncharacterized protein LOC101267085 [Solanum lycopersicum]
Solyc10g081190.1	618.94	518.796	-0.303486	0.0172696	XP_009399943.1|1.6e-95|PREDICTED: somatic embryogenesis receptor kinase 1-like [Musa acuminata subsp. malaccensis]
Solyc01g110310.2	33.2	27.586	-0.304472	0.0337937	XP_004230938.1|1.0e-190|GATA transcription factor 5 [Solanum lycopersicum]
Solyc02g067420.2	77.96	65.013	-0.304596	0.0328566	XP_004233355.1|8.0e-85|ubiquitin-conjugating enzyme E2 2 [Solanum lycopersicum]
Solyc04g080760.2	87.433	72.69	-0.30499	0.0443756	XP_004238287.1|6.3e-189|peroxidase 9 [Solanum lycopersicum]
Solyc12g009810.1	70.723	59.093	-0.305368	0.0378871	XP_010313808.1|1.0e-95|UDP-N-acetylglucosamine transferase subunit ALG13 homolog [Solanum lycopersicum]
Solyc04g078860.2	97.413	81.656	-0.305656	0.0158423	XP_004238152.2|0.0e+00|glutamate receptor 2.9 isoform X4 [Solanum lycopersicum]
Solyc09g015040.1	55.916	46.486	-0.305665	0.0242095	XP_004246304.1|6.0e-303|uncharacterized protein LOC101267731 [Solanum lycopersicum]
Solyc10g017880.1	37.79	31.433	-0.305789	0.0369865	XP_004248571.1|6.4e-225|F-box protein At4g00755 [Solanum lycopersicum]
Solyc05g054500.1	77.27	64.24	-0.306324	0.0273387	XP_004239788.1|2.4e-230|KIN17-like protein [Solanum lycopersicum]
Solyc01g008100.2	39.046	32.473	-0.306485	0.0320011	XP_004228540.1|4.8e-127|uncharacterized protein At4g14100 [Solanum lycopersicum]
Solyc06g074720.2	208.82	173.79	-0.30669	0.000626108	XP_004241297.1|4.2e-118|uncharacterized RNA-binding protein C1827.05c [Solanum lycopersicum]
Solyc05g015920.2	21.213	17.563	-0.307092	0.00568102	XP_010321020.1|0.0e+00|uncharacterized protein LOC101248198 isoform X2 [Solanum lycopersicum]
Solyc05g006900.1	37.246	30.886	-0.307102	0.0103721	XP_004238757.1|2.3e-122|uncharacterized protein LOC101253779 [Solanum lycopersicum]
Solyc07g056010.2	52.236	43.286	-0.307534	0.00113953	XP_004243228.1|0.0e+00|conserved oligomeric Golgi complex subunit 4 [Solanum lycopersicum]
Solyc06g051510.2	23.09	19.143	-0.307658	0.0141413	XP_010322192.1|0.0e+00|dual specificity tyrosine-phosphorylation-regulated kinase 4 isoform X2 [Solanum lycopersicum]
Solyc09g076000.2	18.753	15.546	-0.307776	0.0354737	XP_004247358.1|0.0e+00|probable serine/threonine-protein kinase WNK9 isoform X1 [Solanum lycopersicum]
Solyc03g123900.2	55.86	46.333	-0.308012	0.00302754	XP_004235506.1|0.0e+00|mannosyl-oligosaccharide 1,2-alpha-mannosidase MNS1-like isoform X1 [Solanum lycopersicum]
Solyc04g007870.2	18.773	15.546	-0.308072	0.0260511	XP_004236946.1|0.0e+00|myosin-binding protein 2 isoform X1 [Solanum lycopersicum]
Solyc12g099080.1	157.393	130.79	-0.308785	0.0269849	XP_025884352.1|2.0e-88|ADP-ribosylation factor isoform X1 [Solanum lycopersicum]
Solyc06g069190.2	43.32	35.903	-0.308965	0.00504351	NP_001333817.1|0.0e+00|aspartyl protease APCB1-like [Solanum lycopersicum]
Solyc06g083760.2	23.193	19.193	-0.309651	0.0116416	XP_004242373.1|0.0e+00|uncharacterized protein LOC101264639 isoform X2 [Solanum lycopersicum]
Solyc08g068370.2	46.633	38.59	-0.309788	0.010816	XP_004245269.1|0.0e+00|TOM1-like protein 9 isoform X1 [Solanum lycopersicum]
Solyc11g006040.1	13.843	11.433	-0.310121	0.0405769	XP_004249911.1|0.0e+00|receptor protein kinase TMK1 [Solanum lycopersicum]
Solyc03g123590.2	29.973	24.926	-0.310194	0.0168319	XP_004235529.1|3.5e-274|uncharacterized protein LOC101246610 isoform X1 [Solanum lycopersicum]
Solyc06g051730.2	15.446	12.766	-0.310401	0.0426769	XP_004240944.1|1.2e-311|putative ABC1 protein At2g40090 [Solanum lycopersicum]
Solyc04g008380.2	128.676	105.993	-0.31113	0.00220848	NP_001266117.1|8.7e-165|GAGA-binding transcriptional activator [Solanum lycopersicum]
Solyc01g090430.2	25.25	20.87	-0.311649	0.0295105	NP_001234202.1|0.0e+00|NRC1 [Solanum lycopersicum]
Solyc01g087260.2	23.69	19.566	-0.311711	0.0367708	NP_001233838.1|0.0e+00|carotenoid cleavage dioxygenase 1B isoform 1 [Solanum lycopersicum]
Solyc03g044330.1	99.313	82.16	-0.311868	0.00165867	XP_025888020.1|0.0e+00|uncharacterized protein LOC101253806 [Solanum lycopersicum]
Solyc07g064580.2	21.876	18.066	-0.312116	0.0195213	XP_004244122.1|0.0e+00|uncharacterized protein LOC101248992 [Solanum lycopersicum]
Solyc08g061820.2	29.153	24.056	-0.312844	0.00884353	XP_006353862.1|0.0e+00|PREDICTED: F-box/LRR-repeat protein 15 [Solanum tuberosum]
Solyc12g038920.1	43.546	36.053	-0.313387	0.0401902	XP_004252263.1|3.2e-196|probable serine/threonine-protein kinase DDB_G0291350 [Solanum lycopersicum]
Solyc02g077000.2	41.166	34.003	-0.313483	0.0133709	XP_004232965.1|2.0e-231|phospholipase A1-IIgamma [Solanum lycopersicum]
Solyc01g006430.2	728.483	602.673	-0.313595	0.00270592	XP_027152261.1|1.3e-204|delta(12)-acyl-lipid-desaturase-like [Coffea eugenioides]
Solyc09g010520.2	187.81	155.26	-0.313768	0.001027	XP_004246418.1|4.4e-279|probable ADP-ribosylation factor GTPase-activating protein AGD6 [Solanum lycopersicum]
Solyc01g087430.2	18.656	15.39	-0.313984	0.0113252	XP_004229639.2|0.0e+00|uncharacterized protein LOC101249401 [Solanum lycopersicum]
Solyc05g054920.2	286.093	236.833	-0.314172	0.000212058	XP_004239756.1|3.0e-183|serine/arginine-rich splicing factor RS2Z32 isoform X1 [Solanum lycopersicum]
Solyc11g006460.1	1045.49	861.853	-0.314231	0.00421177	NP_001234241.2|1.2e-248|DnaJ-like protein [Solanum lycopersicum]
Solyc12g006180.1	60.943	50.49	-0.31441	0.000901904	XP_004251544.1|6.4e-261|heterogeneous nuclear ribonucleoprotein 1 [Solanum lycopersicum]
Solyc01g107410.2	13.26	10.913	-0.314583	0.0483258	NP_001308700.1|0.0e+00|PHD-finger family homeodomain protein [Solanum lycopersicum]
Solyc11g068640.1	43.606	35.953	-0.314692	0.00052496	XP_004251071.1|0.0e+00|protein TPLATE [Solanum lycopersicum]
Solyc01g067070.2	27.94	23.07	-0.314694	0.0304749	XP_004229228.1|9.2e-190|mitochondrial thiamine diphosphate carrier 2 [Solanum lycopersicum]
Solyc10g055670.1	121.363	100.02	-0.314863	0.00164788	NP_001304702.1|1.6e-273|V-type proton ATPase subunit B2 [Solanum lycopersicum]
Solyc11g013280.1	24.316	19.966	-0.315399	0.00292493	XP_025884057.1|0.0e+00|protein PIR isoform X2 [Solanum lycopersicum]
Solyc11g005450.1	247.423	204.65	-0.315411	0.0266104	XP_004249876.1|7.0e-202|probable mediator of RNA polymerase II transcription subunit 26c [Solanum lycopersicum]
Solyc09g014820.2	55.58	46.08	-0.315514	0.036334	XP_004246314.1|1.2e-123|protein LURP-one-related 10-like [Solanum lycopersicum]
Solyc01g097320.2	10.006	8.283	-0.315717	0.0166754	XP_010327672.1|0.0e+00|mediator of RNA polymerase II transcription subunit 14 isoform X1 [Solanum lycopersicum]
Solyc01g095100.2	78.313	64.646	-0.3158	0.0284469	XP_004229932.1|2.3e-210|WRKY transcription factor 22 [Solanum lycopersicum]
Solyc02g089980.2	34.993	28.983	-0.316103	0.00201695	XP_019068020.1|5.4e-290|uncharacterized protein LOC101260494 isoform X4 [Solanum lycopersicum]
Solyc09g076050.2	284.86	234.863	-0.316289	0.00299055	XP_004247354.1|2.9e-299|FRIGIDA-like protein 4a [Solanum lycopersicum]
Solyc04g064550.1	73.503	60.65	-0.316472	0.046047	NP_001293096.1|0.0e+00|GRAS6 protein [Solanum lycopersicum]
Solyc01g009420.2	196.326	161.916	-0.317562	0.000221856	XP_004228458.1|4.4e-227|UDP-D-apiose/UDP-D-xylose synthase 2 [Solanum lycopersicum]
Solyc01g104470.2	343.273	283.6	-0.317582	0.000882913	XP_004230519.1|2.8e-126|mRNA turnover protein 4 homolog [Solanum lycopersicum]
Solyc08g082080.2	26.563	21.866	-0.31795	0.022571	XP_009787977.1|3.2e-244|PREDICTED: probable GABA transporter 2 isoform X2 [Nicotiana sylvestris]
Solyc02g085140.2	20.496	17.11	-0.318061	0.0086363	XP_004232416.1|0.0e+00|U-box domain-containing protein 5-like isoform X1 [Solanum lycopersicum]
Solyc03g115470.2	61.22	50.81	-0.318971	0.0075807	XP_004236003.1|9.9e-198|SNAP25 homologous protein SNAP33 [Solanum lycopersicum]
Solyc07g065660.2	18.406	15.123	-0.319018	0.0213466	XP_010324247.1|0.0e+00|cellulose synthase-like protein E1 [Solanum lycopersicum]
Solyc08g082010.2	19.94	16.466	-0.319272	0.0105785	XP_004246103.1|0.0e+00|COP1-interactive protein 1-like [Solanum lycopersicum]
Solyc06g050620.2	27.623	22.696	-0.320088	0.00850637	XP_004240891.1|0.0e+00|protein RETICULATA-RELATED 5, chloroplastic [Solanum lycopersicum]
Solyc07g062890.2	13.696	12.343	-0.320619	0.0104762	XP_010324373.1|1.5e-52|protein yippee-like At5g53940 isoform X3 [Solanum lycopersicum]
Solyc06g008610.2	27.57	22.733	-0.320706	0.019187	NP_001315198.1|2.2e-202|WRKY transcription factor 21 [Solanum lycopersicum]
Solyc08g016050.2	16.55	14.316	-0.320773	0.00771457	XP_010324735.1|0.0e+00|guanine nucleotide exchange factor SPIKE 1 [Solanum lycopersicum]
Solyc08g081320.2	107.723	88.393	-0.322368	0.000137697	XP_004245584.1|0.0e+00|beta-adaptin-like protein C [Solanum lycopersicum]
Solyc04g074740.2	156.783	129.123	-0.32267	0.00689626	XP_004237949.1|4.8e-99|blue copper protein [Solanum lycopersicum]
Solyc03g034250.2	29.62	24.336	-0.323014	0.0331401	XP_004234571.1|2.4e-121|uncharacterized protein LOC101257637 [Solanum lycopersicum]
Solyc12g008960.1	24.18	19.826	-0.323168	0.0370018	XP_004251676.1|2.3e-291|IQ domain-containing protein IQM1 [Solanum lycopersicum]
Solyc03g098170.2	44.12	36.27	-0.323181	0.0333483	XP_004235379.1|5.4e-139|tubulin-folding cofactor B isoform X1 [Solanum lycopersicum]
Solyc11g005330.1	631.84	519.226	-0.323425	0.000324549	XP_016550628.1|3.8e-217|PREDICTED: actin-7-like [Capsicum annuum]
Solyc03g007310.2	97.553	80.22	-0.325031	0.0069154	XP_004234175.1|3.9e-102|abscisic acid receptor PYL8 [Solanum lycopersicum]
Solyc07g054850.2	66.763	54.696	-0.325161	0.0120259	XP_004243303.1|3.1e-184|uncharacterized GPI-anchored protein At4g28100 [Solanum lycopersicum]
Solyc05g013750.2	25.396	20.753	-0.326484	0.0107751	XP_004239146.1|0.0e+00|protein-tyrosine-phosphatase MKP1-like [Solanum lycopersicum]
Solyc04g073990.2	494.113	405.233	-0.327228	0.000428504	NP_001234104.1|9.7e-175|annexin p34 [Solanum lycopersicum]
Solyc11g065750.1	58.21	46.046	-0.327735	0.0011776	XP_004250942.1|0.0e+00|armadillo repeat-containing protein 8 [Solanum lycopersicum]
Solyc06g071470.2	84.486	67.2	-0.327841	0.000692448	XP_010322553.1|2.0e-301|peroxisomal membrane protein PEX14 isoform X1 [Solanum lycopersicum]
Solyc06g059750.2	29.803	24.33	-0.328625	0.000652203	XP_004242058.1|0.0e+00|transcriptional corepressor SEUSS-like [Solanum lycopersicum]
Solyc01g112080.2	77.466	63.383	-0.328787	0.00946154	XP_004231087.1|1.4e-200|lysM domain-containing GPI-anchored protein 2 [Solanum lycopersicum]
Solyc01g079940.2	138.483	113.293	-0.328887	0.0171128	XP_004229430.1|2.5e-251|basic 7S globulin [Solanum lycopersicum]
Solyc12g007200.1	34.133	27.88	-0.329186	0.0252053	XP_004251615.1|5.1e-280|cyclin-dependent kinase F-1 [Solanum lycopersicum]
Solyc09g018510.2	91.703	75.09	-0.329461	0.00103505	XP_004246260.1|5.8e-163|probable phytol kinase 3, chloroplastic [Solanum lycopersicum]
Solyc05g056110.2	34.666	28.323	-0.32959	0.0423918	XP_004239669.1|3.1e-184|mRNA-decapping enzyme subunit 2 [Solanum lycopersicum]
Solyc11g069340.1	28.336	23.106	-0.330017	0.00345766	XP_004251126.1|0.0e+00|zinc finger CCCH domain-containing protein 24 [Solanum lycopersicum]
Solyc01g098920.2	91.123	74.393	-0.330026	0.000709304	PHU10105.1|0.0e+00|Mitochondrial Rho GTPase 3 [Capsicum chinense]
Solyc07g044760.2	74.403	59.273	-0.330276	0.000133325	XP_010323935.2|0.0e+00|DEAD-box ATP-dependent RNA helicase 53, mitochondrial [Solanum lycopersicum]
Solyc08g005500.2	17.176	13.726	-0.330447	0.0171389	XP_010324491.1|0.0e+00|putative late blight resistance protein homolog R1A-3 [Solanum lycopersicum]
Solyc06g053670.1	95.37	78.336	-0.330899	0.00696112	XP_004241014.1|1.6e-128|enoyl-CoA delta isomerase 2, peroxisomal [Solanum lycopersicum]
Solyc07g054220.1	59.126	48.303	-0.33116	0.0383816	XP_004243339.1|4.4e-237|ethylene-responsive transcription factor ERF054 [Solanum lycopersicum]
Solyc06g071100.2	159.653	130.096	-0.331416	0.000336698	XP_011087207.1|0.0e+00|plasma membrane ATPase 3 [Sesamum indicum]
Solyc05g047420.2	23.553	19.206	-0.331469	0.0254016	XP_004240124.1|7.3e-253|exosome complex component RRP45A [Solanum lycopersicum]
Solyc09g098110.2	81.376	66.5	-0.331628	0.00882741	XP_010326935.1|7.2e-202|transcription factor bHLH128 isoform X2 [Solanum lycopersicum]
Solyc08g006750.2	71.29	57.893	-0.332189	0.00325817	XP_004244519.1|3.2e-277|histidine decarboxylase [Solanum lycopersicum]
Solyc03g118540.2	64.226	52.41	-0.332582	0.000810087	XP_010318655.1|2.4e-180|protein TIFY 6B isoform X3 [Solanum lycopersicum]
Solyc03g083430.2	82.61	67.37	-0.332779	0.000224605	XP_004234956.1|2.3e-301|splicing factor SF3a60 homolog [Solanum lycopersicum]
Solyc04g077140.2	19.386	15.763	-0.333001	0.0493083	XP_004238051.1|5.0e-264|uncharacterized protein LOC101246921 [Solanum lycopersicum]
Solyc06g054420.2	102.06	83.15	-0.333141	0.026905	XP_010322266.1|7.0e-238|serine incorporator 3 [Solanum lycopersicum]
Solyc03g116530.2	82.8	67.586	-0.333612	0.0227301	XP_004236038.1|1.6e-98|uncharacterized protein LOC101250492 [Solanum lycopersicum]
Solyc11g069430.1	3350.73	2741.06	-0.33393	0.00798824	NP_001289846.2|1.1e-163|aquaporin PIP2-6 isoform 1 [Solanum lycopersicum]
Solyc04g025200.2	12.126	9.856	-0.333947	0.0239666	XP_025886270.1|1.7e-101|uncharacterized protein LOC101252278 [Solanum lycopersicum]
Solyc06g083300.2	173.183	141.13	-0.334049	1.80068e-05	XP_010323092.1|1.1e-275|putative G3BP-like protein isoform X2 [Solanum lycopersicum]
Solyc07g053280.2	626.526	509.756	-0.334221	0.0154127	XP_004243410.1|0.0e+00|ketol-acid reductoisomerase, chloroplastic [Solanum lycopersicum]
Solyc03g120980.2	49.333	40.073	-0.33449	0.000169391	XP_009591014.1|0.0e+00|PREDICTED: ABC transporter G family member 35-like [Nicotiana tomentosiformis]
Solyc11g066840.1	435.603	348.083	-0.334771	8.81698e-05	NP_001351962.1|2.1e-173|histone deacetylase [Solanum lycopersicum]
Solyc01g087730.2	32.423	26.4	-0.33492	0.0315125	XP_004229660.1|2.3e-187|50S ribosomal protein L1, chloroplastic [Solanum lycopersicum]
Solyc05g011930.2	21.056	17.133	-0.335214	0.0413121	XP_004239023.1|0.0e+00|uncharacterized protein LOC101260227 [Solanum lycopersicum]
Solyc03g006140.2	55.61	45.013	-0.335257	0.00424675	XP_004234090.1|0.0e+00|neutral ceramidase 1 [Solanum lycopersicum]
Solyc10g005640.2	13.616	11.036	-0.335465	0.0459744	XP_004248325.1|0.0e+00|probable protein phosphatase 2C 6 [Solanum lycopersicum]
Solyc01g103430.2	58.163	47.296	-0.335897	0.0216003	XP_023927061.1|8.5e-230|shaggy-related protein kinase kappa [Quercus suber]
Solyc02g089970.2	23.096	18.65	-0.336128	0.00885782	XP_004233646.1|0.0e+00|histone-lysine N-methyltransferase SUVR5 [Solanum lycopersicum]
Solyc08g076180.2	127.463	104.03	-0.336973	0.0145276	XP_004245985.1|5.4e-78|uncharacterized protein LOC101244515 [Solanum lycopersicum]
Solyc08g045850.2	17.353	14.063	-0.337398	0.0351776	NP_001333499.1|0.0e+00|pentatricopeptide repeat-containing protein [Solanum lycopersicum]
Solyc04g005910.2	33.69	27.343	-0.337796	0.00156102	XP_019230360.1|0.0e+00|PREDICTED: protein NSP-INTERACTING KINASE 2-like [Nicotiana attenuata]
Solyc11g011380.1	1596.6	1301.59	-0.338325	0.000803917	XP_015058604.1|1.2e-209|glutamine synthetase [Solanum pennellii]
Solyc03g019940.2	18.303	14.843	-0.338725	0.0180988	XP_004234328.1|0.0e+00|asparagine--tRNA ligase, chloroplastic/mitochondrial [Solanum lycopersicum]
Solyc03g082490.2	85.35	69.166	-0.338769	8.29283e-05	XP_010318052.1|0.0e+00|uncharacterized protein LOC101246515 isoform X1 [Solanum lycopersicum]
Solyc07g040990.2	24.203	19.776	-0.338926	0.00819798	XP_004243738.1|0.0e+00|protein phosphatase 2C 50 isoform X4 [Solanum lycopersicum]
Solyc10g007150.2	48.786	39.563	-0.338937	0.00377212	XP_004248250.1|0.0e+00|apoptosis inhibitor 5-like protein API5 [Solanum lycopersicum]
Solyc06g053750.2	20.196	16.356	-0.338989	0.0266882	XP_004241018.1|0.0e+00|TNF receptor-associated factor homolog 1b isoform X3 [Solanum lycopersicum]
Solyc07g009080.2	2663.21	2189.4	-0.339048	0.041722	XP_015081703.1|3.8e-52|defensin D1-like [Solanum pennellii]
Solyc07g005530.2	213.516	173.153	-0.339258	3.54981e-05	XP_004242587.1|0.0e+00|ubiquitin carboxyl-terminal hydrolase 23 [Solanum lycopersicum]
Solyc10g083220.1	62.183	50.77	-0.339939	0.0211318	XP_004249427.1|8.2e-87|uncharacterized protein LOC101254437 [Solanum lycopersicum]
Solyc01g108530.2	32.46	26.32	-0.340236	0.0222294	XP_004230811.1|1.5e-183|2-hydroxyisoflavanone dehydratase [Solanum lycopersicum]
Solyc03g007480.2	103.876	84.42	-0.340683	0.00224191	XP_004234187.1|4.6e-117|myosin IB heavy chain isoform X2 [Solanum lycopersicum]
Solyc06g051030.2	24.243	19.62	-0.340845	0.00487212	XP_004240911.1|0.0e+00|inactive receptor-like serine/threonine-protein kinase At2g40270 [Solanum lycopersicum]
Solyc05g009070.2	12.776	9.97	-0.34102	0.0472951	XP_015075675.1|5.5e-246|probable protein phosphatase 2C 15 [Solanum pennellii]
Solyc03g033540.2	73.05	59.18	-0.341322	9.72506e-05	NP_001234607.1|0.0e+00|calcium-dependent protein kinase [Solanum lycopersicum]
Solyc06g073050.2	25.736	20.826	-0.341407	0.00401949	NP_001334624.1|0.0e+00|NAC domain-containing protein NACMTF3 [Solanum lycopersicum]
Solyc06g068540.2	20.18	16.34	-0.341427	0.0206093	XP_004241674.1|1.0e-307|uncharacterized protein LOC101256298 isoform X1 [Solanum lycopersicum]
Solyc06g074960.2	11.526	9.453	-0.341713	0.0108445	XP_004241288.1|0.0e+00|dolichol kinase EVAN isoform X1 [Solanum lycopersicum]
Solyc04g049010.2	23.49	18.986	-0.341884	0.0074566	NP_001233774.1|0.0e+00|protein ETHYLENE-INSENSITIVE5 [Solanum lycopersicum]
Solyc09g007540.2	96.403	77.986	-0.342112	6.10817e-05	XP_004246671.1|0.0e+00|valine--tRNA ligase, mitochondrial 1 [Solanum lycopersicum]
Solyc02g031710.2	61.223	49.6	-0.342509	0.00696369	XP_004231579.1|4.6e-190|probable BOI-related E3 ubiquitin-protein ligase 3 [Solanum lycopersicum]
Solyc04g072900.1	115.933	94.173	-0.342544	0.0336666	NP_001234707.1|1.2e-150|dehydration-responsive element binding protein 3 [Solanum lycopersicum]
Solyc12g006170.1	41.46	33.55	-0.343112	0.0368276	XP_025884414.1|1.2e-243|WRKY transcription factor 1 isoform X1 [Solanum lycopersicum]
Solyc10g074900.1	248.076	200.523	-0.343154	0.00651832	XP_004249703.1|0.0e+00|probable LRR receptor-like serine/threonine-protein kinase At1g06840 [Solanum lycopersicum]
Solyc01g087410.2	8.976	7.243	-0.343174	0.0191808	XP_025887091.1|6.4e-212|uncharacterized protein LOC101264566 [Solanum lycopersicum]
Solyc01g111140.2	32.313	26.163	-0.343219	0.0166611	XP_004230880.1|1.0e-192|protein XAP5 CIRCADIAN TIMEKEEPER [Solanum lycopersicum]
Solyc04g076210.2	41.013	33.143	-0.343421	0.00165228	XP_004237986.1|0.0e+00|ubiquitin carboxyl-terminal hydrolase 17 [Solanum lycopersicum]
Solyc09g010630.2	2938.53	2378.89	-0.343866	8.52597e-06	XP_019233791.1|0.0e+00|PREDICTED: heat shock cognate 70 kDa protein 2-like [Nicotiana attenuata]
Solyc10g007130.2	19.046	15.373	-0.343916	0.0401773	XP_004248253.1|0.0e+00|protein SAWADEE HOMEODOMAIN HOMOLOG 2 isoform X2 [Solanum lycopersicum]
Solyc12g014440.1	23.963	19.876	-0.344253	0.00460351	XP_010313924.1|5.1e-191|uncharacterized protein LOC101266909 isoform X3 [Solanum lycopersicum]
Solyc02g065600.2	22.496	18.183	-0.344282	0.0291908	XP_004233405.1|7.2e-266|protein trichome birefringence-like 19 [Solanum lycopersicum]
Solyc12g008490.1	18.903	15.26	-0.344512	0.0331813	XP_004251638.1|4.4e-309|uncharacterized protein LOC101259712 isoform X1 [Solanum lycopersicum]
Solyc06g076750.2	21.22	17.116	-0.3455	0.006087	XP_006350821.1|0.0e+00|PREDICTED: protein NRT1/ PTR FAMILY 8.1-like [Solanum tuberosum]
Solyc01g081010.2	372.876	301.206	-0.345549	1.42176e-06	XP_004229516.1|0.0e+00|nucleolar GTP-binding protein 1 [Solanum lycopersicum]
Solyc02g088240.2	76.546	63.643	-0.345751	0.00603058	XP_015064023.1|1.8e-242|phosphate transporter PHO1 homolog 3-like [Solanum pennellii]
Solyc11g010240.1	27.093	21.803	-0.346169	0.0031227	XP_010312637.1|0.0e+00|protein SCAI [Solanum lycopersicum]
Solyc08g078670.2	50.243	40.486	-0.346483	0.0300161	XP_019422447.1|4.5e-137|PREDICTED: probable aspartyl protease At4g16563 isoform X2 [Lupinus angustifolius]
Solyc10g005770.2	43.973	35.46	-0.346756	0.000678561	XP_004248326.1|0.0e+00|serine/threonine-protein kinase D6PKL2 [Solanum lycopersicum]
Solyc04g051800.2	18.543	14.943	-0.346826	0.00547302	XP_004237462.1|0.0e+00|ABC transporter F family member 5 [Solanum lycopersicum]
Solyc01g094040.2	46.83	37.863	-0.347075	0.0157277	XP_004229874.1|1.8e-120|cucumber peeling cupredoxin [Solanum lycopersicum]
Solyc03g114000.2	70.226	56.826	-0.347238	0.0223237	XP_004236135.1|1.1e-111|LIM domain-containing protein WLIM1 [Solanum lycopersicum]
Solyc03g033560.2	50.783	40.963	-0.347391	0.0292697	XP_019068375.1|2.0e-204|ranBP2-type zinc finger protein At1g67325 isoform X4 [Solanum lycopersicum]
Solyc06g035920.2	89.66	72.593	-0.347724	0.017032	XP_004240737.1|1.7e-95|remorin [Solanum lycopersicum]
Solyc06g069470.2	25.126	20.58	-0.347756	0.0299423	PHT46285.1|9.5e-223|Glycerophosphodiester phosphodiesterase GDPD5 [Capsicum baccatum]
Solyc08g079470.2	42.506	33.863	-0.347946	0.0100982	XP_004245713.1|7.4e-233|putative transferase At4g12130, mitochondrial isoform X2 [Solanum lycopersicum]
Solyc01g112210.2	28.143	22.666	-0.34797	0.00597688	XP_015159389.1|0.0e+00|PREDICTED: probable galacturonosyltransferase 3 isoform X2 [Solanum tuberosum]
Solyc05g010120.2	19.263	15.503	-0.348321	0.000955134	XP_004238982.1|0.0e+00|putative phospholipid-transporting ATPase 9 [Solanum lycopersicum]
Solyc12g014610.1	38.453	30.97	-0.348881	0.00693946	XP_004251909.1|0.0e+00|probable WRKY transcription factor 20 [Solanum lycopersicum]
Solyc01g095040.2	46.143	37.146	-0.349335	0.000709596	XP_004229904.1|0.0e+00|C-terminal binding protein AN [Solanum lycopersicum]
Solyc07g043620.2	15.386	12.36	-0.350062	0.0338748	XP_015082267.1|0.0e+00|auxin response factor 6-like isoform X1 [Solanum pennellii]
Solyc05g052620.2	54.42	43.796	-0.350135	0.00361474	NP_001234464.1|0.0e+00|coronatine-insensitive 1 [Solanum lycopersicum]
Solyc09g010350.2	20.103	16.226	-0.35016	0.0140262	XP_010325886.1|0.0e+00|uncharacterized protein LOC101267439 isoform X1 [Solanum lycopersicum]
Solyc06g060230.2	42.623	34.243	-0.350732	0.0307191	NP_001234219.1|1.7e-178|Nam-like protein 1 [Solanum lycopersicum]
Solyc05g056350.2	84.46	67.963	-0.35084	6.14027e-05	XP_019264133.1|0.0e+00|PREDICTED: cleft lip and palate transmembrane protein 1 homolog [Nicotiana attenuata]
Solyc01g087720.2	19.9	15.98	-0.350847	0.00165228	XP_006345408.1|0.0e+00|PREDICTED: structural maintenance of chromosomes protein 5 [Solanum tuberosum]
Solyc07g005320.2	27.91	22.41	-0.351122	0.00115308	XP_004242571.1|0.0e+00|FIP1[V]-like protein [Solanum lycopersicum]
Solyc09g074930.2	27.283	21.966	-0.352285	0.0469261	XP_004247432.1|5.8e-161|stress-related protein [Solanum lycopersicum]
Solyc02g071990.2	30.463	23.37	-0.352418	0.0145501	XP_004233053.1|3.7e-193|BES1/BZR1 homolog protein 4 isoform X4 [Solanum lycopersicum]
Solyc10g007990.2	46.773	37.596	-0.352902	0.025896	XP_004248194.1|5.5e-142|plant cysteine oxidase 4 [Solanum lycopersicum]
Solyc12g013950.1	17.873	14.326	-0.353163	0.00904766	XP_004251868.1|0.0e+00|sec1 family domain-containing protein MIP3 [Solanum lycopersicum]
Solyc07g047670.2	147.046	118.093	-0.353873	3.46266e-05	XP_004243564.1|0.0e+00|pescadillo homolog [Solanum lycopersicum]
Solyc01g108280.2	42.106	33.773	-0.354294	0.00522629	XP_004230794.1|2.4e-209|serine/threonine-protein kinase SRK2E [Solanum lycopersicum]
Solyc08g005450.1	154.26	124.143	-0.354802	0.0132172	NP_001265998.1|4.7e-184|Hop-interacting protein THI119 [Solanum lycopersicum]
Solyc01g097890.2	22.163	17.773	-0.354949	0.026238	XP_004230126.1|5.2e-263|probable transcription factor At5g28040 [Solanum lycopersicum]
Solyc06g005150.2	356.396	287.033	-0.354991	3.05332e-06	NP_001234788.2|2.1e-143|cytosolic ascorbate peroxidase 2 [Solanum lycopersicum]
Solyc11g005030.1	21.83	17.386	-0.355248	0.0132806	XP_010312452.1|5.6e-210|protein translocase subunit SECA2, chloroplastic isoform X2 [Solanum lycopersicum]
Solyc10g006710.2	11.42	9.183	-0.355291	0.0333252	XP_015089146.1|0.0e+00|G-type lectin S-receptor-like serine/threonine-protein kinase At4g27290 [Solanum pennellii]
Solyc01g107740.2	37.086	29.76	-0.355754	0.0172233	XP_004230748.1|1.2e-142|protein SRC2 homolog [Solanum lycopersicum]
Solyc06g074740.2	26.34	21.076	-0.356249	0.00444117	NP_001233981.1|0.0e+00|vacuolar protein sorting-associated protein 41 homolog [Solanum lycopersicum]
Solyc09g090580.2	272.78	219.7	-0.356346	9.78051e-06	NP_001234772.2|7.0e-113|eukaryotic translation initiation factor iso4E [Solanum lycopersicum]
Solyc12g098950.1	83.866	67.496	-0.356395	0.0118136	XP_004252947.1|3.5e-148|novel plant SNARE 13-like [Solanum lycopersicum]
Solyc11g017140.1	93.47	74.93	-0.356692	0.0122093	XP_004250372.1|2.1e-292|protein SENSITIVE TO PROTON RHIZOTOXICITY 1 [Solanum lycopersicum]
Solyc03g031700.2	16.266	13.016	-0.356994	0.0180349	XP_006343292.1|0.0e+00|PREDICTED: UPF0051 protein ABCI8, chloroplastic-like [Solanum tuberosum]
Solyc12g088750.1	19.623	15.71	-0.357478	0.0229258	XP_004252762.1|6.1e-292|probable serine/threonine-protein kinase At1g01540 [Solanum lycopersicum]
Solyc05g013450.2	15.136	12.086	-0.35791	0.0386568	XP_016553307.1|2.2e-267|PREDICTED: protein DETOXIFICATION 29-like [Capsicum annuum]
Solyc02g089400.2	19.783	15.816	-0.358109	0.0156312	XP_009759063.1|1.6e-241|PREDICTED: probable sodium-coupled neutral amino acid transporter 6 [Nicotiana sylvestris]
Solyc05g051680.2	6.52	5.193	-0.358326	0.0406989	XP_016573351.1|0.0e+00|PREDICTED: structural maintenance of chromosomes protein 6B-like isoform X1 [Capsicum annuum]
Solyc04g005420.2	21.506	17.233	-0.358339	0.0341215	XP_004237057.1|2.3e-131|PLASMODESMATA CALLOSE-BINDING PROTEIN 3 [Solanum lycopersicum]
Solyc05g007180.2	40.396	32.15	-0.358344	0.0257354	NP_001296720.1|3.8e-182|jasmoni isoform 2 [Solanum lycopersicum]
Solyc03g078380.1	45.006	36.173	-0.358857	0.0308929	XP_004235070.1|2.9e-152|uncharacterized protein At5g39865 [Solanum lycopersicum]
Solyc02g071070.2	40.713	32.56	-0.35919	0.000379301	XP_004233089.1|0.0e+00|cation/H(+) antiporter 18-like [Solanum lycopersicum]
Solyc09g092250.2	47.743	37.183	-0.359223	0.000627245	XP_025888871.1|0.0e+00|splicing regulatory glutamine/lysine-rich protein 1 [Solanum lycopersicum]
Solyc02g083820.1	26.763	21.393	-0.359595	0.00190167	XP_004232494.1|0.0e+00|uncharacterized protein LOC101260985 [Solanum lycopersicum]
Solyc12g007070.1	26.05	20.836	-0.359769	0.0342432	XP_004251603.1|1.8e-216|heat stress transcription factor C-1 [Solanum lycopersicum]
Solyc09g090070.1	340.383	272.54	-0.360234	0.000288072	NP_001234361.2|0.0e+00|phosphate transporter 1 [Solanum lycopersicum]
Solyc04g005330.2	61.1	48.843	-0.360737	0.000166321	XP_004237060.1|7.2e-288|uncharacterized WD repeat-containing protein C17D11.16 [Solanum lycopersicum]
Solyc02g093050.2	29.456	23.526	-0.361001	0.00907209	NP_001333854.1|3.4e-183|WRKY transcription factor IId-4 [Solanum lycopersicum]
Solyc04g080240.2	35.486	28.296	-0.361042	0.000334938	XP_010320384.1|0.0e+00|uncharacterized protein LOC101267523 isoform X3 [Solanum lycopersicum]
Solyc08g067370.1	78.54	62.79	-0.361348	0.00123221	XP_004245212.1|2.0e-251|proline-rich receptor-like protein kinase PERK8 [Solanum lycopersicum]
Solyc10g083890.1	38.913	31.143	-0.362121	0.0257907	XP_004249474.1|1.2e-156|alpha carbonic anhydrase 7-like [Solanum lycopersicum]
Solyc08g080940.2	197.85	158.566	-0.362291	0.00315693	XP_015085272.1|8.2e-131|probable phospholipid hydroperoxide glutathione peroxidase isoform X1 [Solanum pennellii]
Solyc06g005620.2	159.043	127.28	-0.363034	0.00157952	NP_001309762.1|1.7e-191|zinc transporter precursor [Solanum lycopersicum]
Solyc06g083520.2	12.506	9.95	-0.363452	0.0225705	XP_004242396.1|0.0e+00|guanine nucleotide-binding protein-like NSN1 [Solanum lycopersicum]
Solyc04g076820.1	64.06	51.14	-0.363797	0.00651513	XP_004238032.1|7.1e-282|uncharacterized protein LOC101265728 [Solanum lycopersicum]
Solyc12g057060.1	101.676	81.206	-0.363865	2.77642e-05	XP_015060143.1|1.3e-286|7-deoxyloganetin glucosyltransferase-like [Solanum pennellii]
Solyc03g078160.2	24.603	19.643	-0.363926	0.0313436	XP_004235082.1|9.6e-103|uncharacterized protein LOC101268745 [Solanum lycopersicum]
Solyc07g064150.2	874.236	700.043	-0.363981	0.00982537	XP_004244151.1|6.6e-58|protein translation factor SUI1 homolog [Solanum lycopersicum]
Solyc09g090600.2	242.65	194.036	-0.363986	0.0177951	XP_004247765.1|1.3e-147|acid phosphatase 1-like [Solanum lycopersicum]
Solyc04g074980.2	40.573	32.34	-0.364441	0.000581821	NP_001234722.1|0.0e+00|LeTIR [Solanum lycopersicum]
Solyc12g100270.1	94.86	75.523	-0.364913	0.00430048	XP_004252845.1|0.0e+00|protein ECERIFERUM 1 [Solanum lycopersicum]
Solyc01g096460.2	51.206	40.843	-0.365866	0.00744187	XP_004230032.1|9.7e-169|U-box domain-containing protein 11 [Solanum lycopersicum]
Solyc12g094620.1	187.856	147.92	-0.366066	0.00328708	ANQ45553.1|1.5e-295|catalase [Solanum lycopersicum]
Solyc08g082170.2	43.156	34.346	-0.366602	0.000337674	XP_019070782.1|7.9e-276|probable polygalacturonase isoform X1 [Solanum lycopersicum]
Solyc06g009290.2	59.733	47.52	-0.367041	2.82577e-05	XP_004240558.1|0.0e+00|ABC transporter B family member 21 [Solanum lycopersicum]
Solyc03g117440.2	33.043	26.263	-0.36799	0.00969097	XP_004235903.1|0.0e+00|DEAD-box ATP-dependent RNA helicase 35 [Solanum lycopersicum]
Solyc04g071650.2	108.51	86.066	-0.368591	0.00109893	XP_009765335.1|0.0e+00|PREDICTED: cellulose synthase A catalytic subunit 2 [UDP-forming]-like [Nicotiana sylvestris]
Solyc03g005340.2	35.356	28.08	-0.368664	0.000101954	XP_006356048.1|0.0e+00|PREDICTED: acylamino-acid-releasing enzyme isoform X1 [Solanum tuberosum]
Solyc08g075860.2	265.803	211.536	-0.368845	0.000691791	XP_004245950.1|2.3e-209|uncharacterized protein LOC101259778 [Solanum lycopersicum]
Solyc02g071510.2	26.58	21.086	-0.36898	0.0219443	XP_004232976.1|0.0e+00|transcription factor GTE9 [Solanum lycopersicum]
Solyc04g077260.2	24.146	19.193	-0.369187	0.0395707	XP_004238554.1|4.4e-193|transcription factor RAX3-like [Solanum lycopersicum]
Solyc10g050110.1	73.836	58.716	-0.369659	0.000413441	XP_004248758.1|6.3e-264|uncharacterized protein At4g06744-like [Solanum lycopersicum]
Solyc09g074330.2	12.326	9.89	-0.369842	0.00439887	XP_004247476.1|0.0e+00|nodulin homeobox isoform X2 [Solanum lycopersicum]
Solyc01g089980.2	65.81	52.16	-0.369849	0.00423957	XP_004229736.1|3.7e-150|ELMO domain-containing protein A isoform X1 [Solanum lycopersicum]
Solyc11g065100.1	74.933	60.126	-0.369945	0.0144327	XP_004250907.1|3.2e-91|mitochondrial fission 1 protein A [Solanum lycopersicum]
Solyc08g066600.2	35.71	28.296	-0.370184	0.000756139	XP_004245164.1|0.0e+00|protein unc-13 homolog [Solanum lycopersicum]
Solyc01g005580.2	74.796	59.463	-0.370727	0.00393597	NP_001352378.1|1.4e-110|uncharacterized protein LOC101267835 [Solanum lycopersicum]
Solyc12g096700.1	381.64	305.186	-0.371059	0.0026364	XP_015061673.1|1.9e-103|60S ribosomal protein L9-1-like [Solanum pennellii]
Solyc04g011560.2	34.53	27.38	-0.371959	0.00625894	XP_004236739.1|8.2e-273|UBP1-associated protein 2B-like [Solanum lycopersicum]
Solyc01g095370.2	25.636	20.876	-0.372021	0.0219683	XP_015070615.1|2.1e-241|F-box/kelch-repeat protein At3g61590 isoform X2 [Solanum pennellii]
Solyc03g025440.2	20.236	16.003	-0.372531	0.00448106	XP_004234412.1|0.0e+00|uncharacterized protein LOC101256560 [Solanum lycopersicum]
Solyc02g085320.1	11.683	9.276	-0.372797	0.0132492
Solyc12g042380.1	106.436	84.273	-0.372894	0.0198328	XP_004252289.1|5.7e-276|uncharacterized protein LOC101252852 [Solanum lycopersicum]
Solyc04g076200.2	90.373	71.773	-0.373413	0.00327967	NP_001308098.1|7.7e-93|universal stress protein A-like protein [Solanum lycopersicum]
Solyc01g111930.2	16.763	13.253	-0.373542	0.00416444	XP_004231073.1|0.0e+00|rop guanine nucleotide exchange factor 1 [Solanum lycopersicum]
Solyc05g009350.2	10.936	8.633	-0.374472	0.0158431	XP_004238929.1|0.0e+00|uncharacterized protein LOC101254691 [Solanum lycopersicum]
Solyc01g008110.2	312.043	247.11	-0.374488	2.33493e-05	NP_001234537.2|1.2e-283|sterol C14-demetylase [Solanum lycopersicum]
Solyc08g081140.2	11.096	8.756	-0.374704	0.0203157	NP_001333930.1|0.0e+00|bHLH-type transcription factor JAF13 [Solanum lycopersicum]
Solyc03g120550.2	17.98	14.173	-0.374981	0.03709	XP_025885994.1|0.0e+00|protein NRT1/ PTR FAMILY 1.2-like isoform X4 [Solanum lycopersicum]
Solyc05g005730.2	72.123	57.116	-0.374994	0.000159853	XP_004238678.1|5.3e-198|RRP15-like protein [Solanum lycopersicum]
Solyc03g115000.2	11.563	9.123	-0.375096	0.00626841	XP_010318861.1|0.0e+00|protein LONGIFOLIA 2 [Solanum lycopersicum]
Solyc08g081690.2	14.61	11.533	-0.375152	0.0026778	XP_019070572.1|0.0e+00|NADPH oxidase isoform X1 [Solanum lycopersicum]
Solyc07g053800.2	17.11	13.48	-0.375405	0.0163198	XP_004243368.2|4.0e-303|putative E3 ubiquitin-protein ligase RING1a isoform X1 [Solanum lycopersicum]
Solyc11g005460.1	17.043	13.473	-0.375706	0.0259849	XP_004249875.1|3.8e-127|TOM1-like protein 5 [Solanum lycopersicum]
Solyc02g076810.2	17.023	13.436	-0.375805	0.0366361	XP_004233061.1|2.0e-159|trihelix transcription factor ASIL2 isoform X2 [Solanum lycopersicum]
BGI_novel_G000060	40.763	32.22	-0.375934	0.0363006
Solyc02g093980.2	26.48	20.94	-0.376039	0.00365739	XP_004231790.1|0.0e+00|uncharacterized protein LOC101246002 [Solanum lycopersicum]
Solyc03g007210.2	42.29	34.08	-0.376094	0.00536613	XP_015067733.1|6.4e-266|rust resistance kinase Lr10 [Solanum pennellii]
Solyc06g065650.2	27.7	21.893	-0.376241	0.00579233	XP_004241802.1|2.3e-245|protein TIFY 8 [Solanum lycopersicum]
Solyc01g068080.2	35.666	28.206	-0.376265	0.0220933	XP_004229182.1|2.4e-184|tetraketide alpha-pyrone reductase 2-like isoform X1 [Solanum lycopersicum]
Solyc03g115500.2	18.73	14.776	-0.37651	0.0134986	XP_015071228.1|0.0e+00|heparanase-like protein 1 [Solanum pennellii]
Solyc04g008740.2	264.746	209.296	-0.377304	7.02094e-05	OWM72636.1|7.6e-267|hypothetical protein CDL15_Pgr013104 [Punica granatum]
Solyc06g074010.2	3.66	2.97	-0.377543	0.0407785	XP_004241343.1|4.2e-254|transcription factor E2FB-like isoform X1 [Solanum lycopersicum]
Solyc08g077460.2	40.39	31.873	-0.377726	0.00318346	XP_004245850.1|7.6e-199|BOI-related E3 ubiquitin-protein ligase 1 [Solanum lycopersicum]
Solyc03g121960.2	30.39	23.973	-0.37792	0.000487505	XP_004235572.1|0.0e+00|phospholipid:diacylglycerol acyltransferase 1 [Solanum lycopersicum]
Solyc04g082160.2	54.173	42.75	-0.37833	0.000150638	XP_010320449.1|0.0e+00|ubiquitin-like domain-containing protein CIP73 isoform X1 [Solanum lycopersicum]
Solyc03g093160.2	74.786	57.98	-0.379167	0.00239719	XP_004235160.1|8.5e-205|luc7-like protein 3 [Solanum lycopersicum]
Solyc01g095700.2	216.613	171.536	-0.379196	0.000991062	NP_001333055.1|8.3e-102|regulatory component of ABA receptor3-like [Solanum lycopersicum]
Solyc01g100660.2	125.446	99.39	-0.379359	0.00862783	XP_010313623.1|1.1e-109|transcription factor bHLH149 [Solanum lycopersicum]
Solyc07g056270.2	20.65	16.266	-0.37966	0.0139647	XP_004243208.1|1.7e-293|probable receptor-like protein kinase At2g42960 [Solanum lycopersicum]
Solyc08g083330.2	67.66	53.246	-0.379777	0.0305474	XP_004245442.1|5.5e-242|uncharacterized protein LOC101259469 [Solanum lycopersicum]
Solyc01g008810.2	47.136	37.213	-0.38003	0.00485059	XP_004228498.1|5.1e-137|uncharacterized protein LOC101258982 [Solanum lycopersicum]
Solyc04g078250.2	18.746	14.753	-0.380403	0.0029965	NP_001308166.1|9.4e-262|metal transporter Nramp2 [Solanum lycopersicum]
Solyc05g018180.2	8.733	6.843	-0.380789	0.0497402	XP_004239267.1|0.0e+00|protein unc-13 homolog [Solanum lycopersicum]
Solyc06g076410.2	112.01	88.463	-0.380958	0.00020958	OIT02275.1|3.6e-163|methylsterol monooxygenase 2-2, partial [Nicotiana attenuata]
Solyc05g056450.2	15.006	11.793	-0.381086	0.0325892	XP_004239638.1|4.1e-253|aspartic proteinase nepenthesin-1 [Solanum lycopersicum]
Solyc10g007930.2	43.276	34.156	-0.381176	0.00123276	XP_025883549.1|1.5e-155|cytochrome P450 CYP72A219-like isoform X1 [Solanum lycopersicum]
Solyc08g068100.2	28.69	22.576	-0.381325	0.000843907	XP_004245249.1|0.0e+00|nitrate regulatory gene2 protein [Solanum lycopersicum]
Solyc11g045120.1	22.796	18.07	-0.381522	0.00357057	XP_010313097.1|0.0e+00|eukaryotic translation initiation factor 2D isoform X1 [Solanum lycopersicum]
Solyc08g045640.2	17.103	13.436	-0.382497	0.0178963	NP_001296826.1|1.7e-240|uncharacterized protein LOC101243914 [Solanum lycopersicum]
Solyc12g008370.1	67.906	53.74	-0.382841	0.000600582	XP_004251628.1|7.3e-237|SNW/SKI-interacting protein A [Solanum lycopersicum]
Solyc03g114950.2	97.573	76.763	-0.383021	0.000738378	NP_001311224.1|0.0e+00|ABC transporter B family member 21 [Solanum lycopersicum]
Solyc06g071810.1	39.076	30.713	-0.383574	0.000295009	NP_001302425.1|0.0e+00|leucine-rich repeat receptor-like serine/threonine/tyrosine-protein kinase SOBIR1 precursor [Solanum lycopersicum]
Solyc01g006830.2	45.526	35.776	-0.383837	0.000230119	XP_004228629.1|8.4e-258|protein WVD2-like 4 [Solanum lycopersicum]
Solyc10g047130.1	33.42	23.353	-0.384303	0.00116979	XP_004248805.1|3.3e-126|glycine-rich RNA-binding protein RZ1A [Solanum lycopersicum]
Solyc10g084250.1	17.57	13.783	-0.384348	0.0152265	NP_001307224.1|0.0e+00|clade VIII lectin receptor kinase precursor [Solanum lycopersicum]
Solyc06g074210.2	79.91	62.793	-0.384774	0.00193929	XP_004241329.1|4.0e-212|mRNA-decapping enzyme-like protein isoform X2 [Solanum lycopersicum]
Solyc11g012930.1	280.13	220.506	-0.384857	0.000151735	XP_019066706.1|5.0e-206|WAT1-related protein At4g08300 [Solanum lycopersicum]
Solyc03g044100.2	35.103	27.506	-0.384944	0.0441027	NP_001296734.1|7.6e-190|peroxidase 51 precursor [Solanum lycopersicum]
Solyc04g009510.2	23.763	18.63	-0.385051	0.00236853	XP_010319297.1|0.0e+00|uncharacterized protein LOC101257555 isoform X1 [Solanum lycopersicum]
Solyc01g104700.2	204.786	161.33	-0.386396	3.04224e-05	NP_001234020.1|1.9e-128|GTP-binding nuclear protein Ran2 [Solanum lycopersicum]
Solyc12g055720.1	72.54	56.876	-0.386657	0.00131611	XP_004252624.1|0.0e+00|protein STRUBBELIG-RECEPTOR FAMILY 6 [Solanum lycopersicum]
Solyc06g030470.2	13.806	10.77	-0.387418	0.0320011	XP_004240776.1|1.1e-233|protein UPSTREAM OF FLC [Solanum lycopersicum]
Solyc06g075390.2	60.336	45.85	-0.387436	0.00175192	XP_004241263.1|1.1e-165|exosome complex component RRP43-like isoform X1 [Solanum lycopersicum]
Solyc12g006550.1	70.756	55.626	-0.388744	0.00216317	XP_004251566.1|9.3e-188|ribosome biogenesis regulatory protein homolog [Solanum lycopersicum]
Solyc04g008730.2	73.883	58.263	-0.389014	0.00550992	PHT54098.1|5.6e-222|Alpha-galactosidase [Capsicum baccatum]
Solyc09g092070.2	33.846	26.48	-0.389216	0.0061438	XP_004247865.1|1.3e-283|TBC1 domain family member 13 [Solanum lycopersicum]
Solyc10g049630.1	21.226	16.623	-0.389546	0.0305474	XP_004248768.1|3.4e-218|probable protein phosphatase 2C 63 [Solanum lycopersicum]
Solyc02g082140.2	26.89	21.043	-0.389706	0.00259117	XP_004232603.1|4.5e-306|galactan beta-1,4-galactosyltransferase GALS3 [Solanum lycopersicum]
Solyc03g121950.2	76.173	59.713	-0.390431	0.000188764	XP_004235573.1|0.0e+00|polyadenylate-binding protein-interacting protein 4 isoform X1 [Solanum lycopersicum]
Solyc05g046030.2	19.773	15.486	-0.390479	0.0333461	XP_004240141.1|4.0e-185|peroxidase 3-like [Solanum lycopersicum]
Solyc03g114730.2	31.963	25.316	-0.390742	0.00789754	XP_004236078.1|2.7e-292|O-fucosyltransferase 34-like [Solanum lycopersicum]
Solyc07g045040.2	36.743	28.57	-0.391414	0.00255166	XP_004243610.1|6.5e-202|protein SRG1-like [Solanum lycopersicum]
Solyc01g110460.2	10.033	7.576	-0.391541	0.0438366	XP_004230939.1|3.0e-198|polyprenol reductase 2 isoform X1 [Solanum lycopersicum]
Solyc02g087340.2	83.21	65.073	-0.391951	0.00121293	NP_001265964.1|4.6e-205|Hop-interacting protein THI043 [Solanum lycopersicum]
Solyc11g009080.1	222.183	174.043	-0.392054	9.09933e-07	XP_006353220.1|1.4e-259|PREDICTED: phospho-2-dehydro-3-deoxyheptonate aldolase 2, chloroplastic-like [Solanum tuberosum]
Solyc07g062730.1	7.803	6.076	-0.392133	0.0451606	XP_004244255.1|0.0e+00|uncharacterized protein LOC101262936 [Solanum lycopersicum]
Solyc01g073650.2	154.74	121.1	-0.392594	2.94938e-05	XP_004229332.1|9.7e-187|serine/threonine-protein phosphatase PP2A-5 catalytic subunit [Solanum lycopersicum]
Solyc06g083230.2	19.216	14.996	-0.3927	0.00490094	NP_001234141.1|9.2e-267|GTP cyclohydrolase 1 [Solanum lycopersicum]
Solyc03g098110.2	17.496	13.656	-0.392949	0.014101	XP_004235373.2|7.1e-213|uncharacterized protein LOC101250673 isoform X1 [Solanum lycopersicum]
Solyc08g060970.2	35.996	31.31	-0.393003	0.00120297	NP_001234200.2|3.2e-237|polygalacturonase precursor [Solanum lycopersicum]
Solyc01g010440.2	75.546	58.996	-0.393798	0.00011369	XP_004228404.1|3.7e-254|uncharacterized protein LOC101255911 [Solanum lycopersicum]
Solyc04g082500.2	61.49	47.993	-0.394261	0.00298317	XP_010320466.1|3.6e-244|probable serine/threonine-protein kinase PIX13 isoform X2 [Solanum lycopersicum]
Solyc04g016180.2	63.37	49.493	-0.394299	0.000704966	XP_004236596.1|1.1e-311|EGF domain-specific O-linked N-acetylglucosamine transferase-like [Solanum lycopersicum]
Solyc12g014420.1	96.53	75.466	-0.394541	7.37804e-06	XP_004251911.1|9.2e-277|glucan endo-1,3-beta-glucosidase 13-like [Solanum lycopersicum]
Solyc02g065790.2	14.413	11.233	-0.394697	0.00907209	XP_004233390.1|2.5e-257|uncharacterized protein LOC101251060 isoform X1 [Solanum lycopersicum]
Solyc10g006260.2	31.313	24.38	-0.395051	0.0214413	XP_010327176.1|0.0e+00|splicing factor, suppressor of white-apricot homolog isoform X2 [Solanum lycopersicum]
Solyc04g072000.2	284.69	222.89	-0.395317	2.11179e-07	XP_004237833.1|1.4e-168|endochitinase EP3 [Solanum lycopersicum]
Solyc02g067600.1	19.846	14.44	-0.395466	0.0144327	XP_015168763.1|1.9e-44|PREDICTED: neurofilament medium polypeptide [Solanum tuberosum]
Solyc04g056560.2	43.486	34.523	-0.395843	0.00123684	XP_004237585.1|5.5e-227|probable protein phosphatase 2C 33 [Solanum lycopersicum]
Solyc03g005430.2	45.446	35.37	-0.396089	0.00161029	XP_004234033.1|0.0e+00|TNF receptor-associated factor homolog 1b-like [Solanum lycopersicum]
Solyc10g085460.1	5.096	3.95	-0.396728	0.0469059	XP_010312315.1|0.0e+00|putative disease resistance protein RGA3 isoform X2 [Solanum lycopersicum]
Solyc08g061090.2	27.036	21.053	-0.396931	0.00102494	XP_004245030.1|2.9e-224|adenine nucleotide transporter BT1, chloroplastic/mitochondrial [Solanum lycopersicum]
Solyc06g005310.2	36.616	28.426	-0.39728	0.0488701	XP_004240351.1|5.2e-137|transcription factor MYB48-like [Solanum lycopersicum]
Solyc09g074520.2	32.793	25.533	-0.39748	9.38339e-05	XP_016565699.1|0.0e+00|PREDICTED: protein TRANSPORT INHIBITOR RESPONSE 1-like isoform X1 [Capsicum annuum]
Solyc06g083540.2	93.6	73.116	-0.397731	0.000762961	XP_004242394.1|7.4e-154|H/ACA ribonucleoprotein complex subunit GAR1 [Solanum lycopersicum]
Solyc01g008650.2	43.556	33.816	-0.397765	0.0274776	XP_004228510.1|3.8e-293|premnaspirodiene oxygenase [Solanum lycopersicum]
BGI_novel_G000281	9.396	7.273	-0.398932	0.00963827
Solyc09g082210.2	65.133	50.713	-0.399238	0.00113564	XP_010326674.1|4.3e-171|protein MARD1 [Solanum lycopersicum]
Solyc01g010020.2	29.74	23.136	-0.399571	0.0147382	XP_004228426.1|1.0e-83|probable calcium-binding protein CML15 [Solanum lycopersicum]
Solyc09g009690.2	48.383	37.65	-0.399829	0.00246015	XP_004246525.1|1.7e-191|probable uridine nucleosidase 1 isoform X2 [Solanum lycopersicum]
Solyc02g084340.1	43.853	34.023	-0.400155	0.00402199	XP_004232473.1|1.1e-260|pre-mRNA-splicing factor CWC25 homolog [Solanum lycopersicum]
Solyc06g065570.2	88.896	69.423	-0.400334	0.000494262	NP_001333065.1|1.0e-89|acyl-CoA N-acyltransferases (NAT) superfamily protein [Solanum lycopersicum]
Solyc07g055140.2	8.826	6.946	-0.400541	0.0149655	XP_010323685.1|1.2e-202|uncharacterized protein LOC101245858 isoform X2 [Solanum lycopersicum]
Solyc01g079480.2	126.283	98.406	-0.400626	9.15653e-05	NP_001234339.1|8.6e-76|bZIP transcription factor [Solanum lycopersicum]
Solyc01g100310.2	14.523	11.243	-0.400996	0.0380238	XP_004230290.2|4.0e-221|uncharacterized protein LOC101243829 [Solanum lycopersicum]
Solyc08g005800.2	171.033	132.846	-0.401774	0.00187377	XP_019263127.1|4.9e-149|PREDICTED: pectin acetylesterase 8-like isoform X1 [Nicotiana attenuata]
Solyc05g007510.2	5.26	4.063	-0.401903	0.0276752	NP_001234319.1|0.0e+00|RNA-directed RNA polymerase [Solanum lycopersicum]
Solyc07g008130.2	902.176	704.846	-0.40236	0.000937118	XP_015081721.1|2.0e-97|umecyanin-like [Solanum pennellii]
Solyc03g079880.2	1432.04	1120.15	-0.403025	0.00407037	NP_001306089.1|2.2e-59|xylem sap protein 10 kDa precursor [Solanum lycopersicum]
Solyc04g017750.2	19.906	15.443	-0.403105	7.59074e-05	XP_004236561.1|0.0e+00|calmodulin binding protein PICBP-like [Solanum lycopersicum]
Solyc07g005100.2	138.616	107.763	-0.403536	2.15054e-05	XP_004242562.1|4.3e-220|class V chitinase [Solanum lycopersicum]
Solyc10g008480.2	17.306	13.173	-0.403731	0.0242117	XP_004248155.1|2.4e-186|uncharacterized protein LOC101260180 [Solanum lycopersicum]
Solyc09g055570.2	53.766	41.986	-0.404132	4.45062e-05	XP_004247017.1|0.0e+00|probable LRR receptor-like serine/threonine-protein kinase At1g06840 isoform X1 [Solanum lycopersicum]
Solyc03g006770.2	22.4	17.323	-0.40422	0.00476677	XP_019068308.1|0.0e+00|receptor-like serine/threonine-protein kinase SD1-8 [Solanum lycopersicum]
Solyc10g083110.1	48.8	37.84	-0.404578	0.00135881	XP_015088919.1|2.8e-181|4-hydroxy-tetrahydrodipicolinate synthase, chloroplastic [Solanum pennellii]
Solyc01g005970.2	15.6	12.053	-0.404814	0.0129305	XP_004228650.1|3.6e-264|F-box/kelch-repeat protein At1g55270 [Solanum lycopersicum]
Solyc09g092520.2	155.066	120.466	-0.404894	0.000886554	NP_001296797.1|8.4e-166|xyloglucan endotransglucosylase/hydrolase precursor [Solanum lycopersicum]
Solyc03g112270.2	95	73.596	-0.404988	0.000346005	XP_004236264.1|4.1e-299|plant intracellular Ras-group-related LRR protein 9 [Solanum lycopersicum]
Solyc07g062580.2	51.336	39.746	-0.405156	3.47321e-05	XP_004244266.1|0.0e+00|TPR repeat-containing thioredoxin TTL1 [Solanum lycopersicum]
Solyc09g018750.2	750.05	584.843	-0.406274	0.00406857	NP_001294932.1|5.2e-111|CBS domain-containing protein CBSX3, mitochondrial isoform 1 [Solanum lycopersicum]
Solyc05g006850.2	137.806	107.19	-0.406309	0.00486414	XP_004238753.1|5.5e-74|thioredoxin H4 [Solanum lycopersicum]
Solyc10g076610.1	72.05	55.63	-0.406572	0.00850727	XP_009763281.1|1.3e-264|PREDICTED: lysine--tRNA ligase-like isoform X1 [Nicotiana sylvestris]
Solyc11g010100.1	42.46	33.013	-0.407081	0.0134874	NP_001353441.1|7.9e-122|ras-related protein RABA4a-like [Solanum lycopersicum]
Solyc08g079250.2	126.93	96.5	-0.407115	0.00465769	XP_004245725.1|8.3e-80|lipid transfer-like protein VAS isoform X3 [Solanum lycopersicum]
Solyc04g016510.2	39.65	30.646	-0.408219	5.53214e-05	XP_004236572.1|1.3e-302|U4/U6 small nuclear ribonucleoprotein PRP4-like protein [Solanum lycopersicum]
Solyc04g054980.2	425.01	329.863	-0.408295	2.72482e-05	XP_004237403.1|1.1e-106|PLAT domain-containing protein 3 [Solanum lycopersicum]
Solyc04g079400.2	11.363	8.76	-0.408924	0.00860889	XP_004238187.1|0.0e+00|mitogen-activated protein kinase kinase kinase 5 isoform X2 [Solanum lycopersicum]
Solyc10g050850.1	32.223	24.86	-0.409147	0.0279044	XP_004248739.1|1.1e-199|uncharacterized protein LOC101247969 isoform X2 [Solanum lycopersicum]
Solyc11g051160.1	332.036	256.81	-0.40917	2.71469e-05	XP_004250845.1|0.0e+00|patellin-3-like [Solanum lycopersicum]
Solyc04g009470.2	8.056	5.93	-0.409544	0.048212	XP_019068825.1|3.1e-90|uncharacterized protein LOC101258644 isoform X8 [Solanum lycopersicum]
Solyc02g082430.2	74.153	57.26	-0.410294	8.77089e-05	XP_004232584.1|0.0e+00|MLO-like protein 8 isoform X1 [Solanum lycopersicum]
Solyc01g014180.2	228.44	176.993	-0.411061	0.000339011	XP_015062367.1|4.7e-99|zinc finger A20 and AN1 domain-containing stress-associated protein 8 isoform X1 [Solanum pennellii]
Solyc07g049700.1	5.916	4.54	-0.411439	0.0441659	XP_004243493.1|0.0e+00|putative late blight resistance protein homolog R1B-16 [Solanum lycopersicum]
Solyc08g082040.2	14.71	11.306	-0.412093	0.00203088	XP_004245536.1|0.0e+00|protein ENHANCED DISEASE RESISTANCE 4 [Solanum lycopersicum]
Solyc04g054700.2	33.84	27.31	-0.412514	0.00056105	XP_004237420.1|1.2e-194|general transcription factor IIH subunit 2 isoform X1 [Solanum lycopersicum]
Solyc06g074800.1	21.283	16.383	-0.413065	0.0434348	XP_015077652.1|1.7e-181|zinc finger protein ZAT5-like [Solanum pennellii]
Solyc06g036170.1	25.95	19.966	-0.413099	0.00384174	XP_004240721.1|0.0e+00|scarecrow-like protein 8 [Solanum lycopersicum]
Solyc12g087790.1	101.243	77.976	-0.413156	0.0113888	XP_004252525.1|9.8e-12|classical arabinogalactan protein 5 [Solanum lycopersicum]
Solyc08g076540.2	260.693	201.13	-0.413295	0.000200399	NP_001275222.1|1.4e-142|syntaxin-like protein [Solanum tuberosum]
Solyc05g055070.2	30.323	23.5	-0.413306	0.000120225	XP_004239739.1|0.0e+00|protein EIN4-like [Solanum lycopersicum]
Solyc01g108680.2	81.283	62.706	-0.414221	0.000214275	XP_004230823.1|8.2e-207|polyneuridine-aldehyde esterase [Solanum lycopersicum]
Solyc01g102570.2	54.86	42.18	-0.414503	0.009101	XP_025888824.1|8.3e-202|eukaryotic translation initiation factor 3 subunit C-like [Solanum lycopersicum]
Solyc12g098740.1	127.61	99.016	-0.414834	5.78094e-07	XP_004252964.1|0.0e+00|clathrin interactor EPSIN 2 [Solanum lycopersicum]
Solyc09g090350.2	28	21.506	-0.415089	0.000435357	XP_009790215.1|0.0e+00|PREDICTED: long-chain-alcohol oxidase FAO1 [Nicotiana sylvestris]
Solyc12g099250.1	68.09	52.366	-0.415285	5.79385e-05	XP_004252926.1|0.0e+00|RGS domain-containing serine/threonine-protein kinase A-like isoform X1 [Solanum lycopersicum]
Solyc04g009910.2	48.376	37.25	-0.415829	0.0182524	XP_004236793.1|3.6e-160|phosphoenolpyruvate carboxylase kinase 2 [Solanum lycopersicum]
Solyc04g082960.1	109.713	84.63	-0.415895	0.0472951	XP_004238475.1|9.6e-97|uncharacterized protein LOC101247521 [Solanum lycopersicum]
Solyc09g098440.2	18.923	17.593	-0.415895	0.0178114	XP_004247984.1|1.6e-32|V-type proton ATPase subunit e1-like [Solanum lycopersicum]
Solyc04g016010.2	4.366	3.053	-0.415928	0.0230588	XP_010319181.1|4.5e-292|LOW QUALITY PROTEIN: thioredoxin reductase NTRC [Solanum lycopersicum]
Solyc00g009120.2	56.053	43.263	-0.416064	0.00683482	XP_004253269.1|7.0e-96|dehydrogenase/reductase SDR family member 12-like, partial [Solanum lycopersicum]
Solyc03g093140.2	12.1	9.3	-0.416074	0.0107751	XP_004235159.1|2.7e-303|putative glycerol-3-phosphate transporter 1 [Solanum lycopersicum]
Solyc06g071720.1	528.206	412.163	-0.416535	5.33719e-05	XP_004241546.1|8.2e-83|60S ribosomal protein L27a-3-like [Solanum lycopersicum]
Solyc09g074230.2	80.796	62.126	-0.416854	1.64697e-05	XP_016565620.1|5.2e-258|PREDICTED: sugar transporter ERD6-like 7 [Capsicum annuum]
Solyc03g078120.2	21.406	16.436	-0.417279	0.00538178	XP_004235079.1|4.0e-80|NAC domain-containing protein 82-like [Solanum lycopersicum]
Solyc02g089940.2	19.133	14.61	-0.41738	0.000388956	XP_004232087.1|0.0e+00|BEL1-like homeodomain protein 2 [Solanum lycopersicum]
Solyc03g118970.2	9.99	7.643	-0.417781	0.0338748	XP_016562783.1|3.7e-253|PREDICTED: protein DETOXIFICATION 16-like [Capsicum annuum]
Solyc06g075500.2	46.86	35.94	-0.418115	0.000719969	XP_004241260.1|0.0e+00|protein NRT1/ PTR FAMILY 2.7-like [Solanum lycopersicum]
Solyc08g059660.1	153.17	119.363	-0.418203	7.42999e-06	XP_010324965.1|0.0e+00|putative clathrin assembly protein At2g25430 [Solanum lycopersicum]
Solyc02g082760.2	321.883	246.99	-0.418559	8.50904e-05	XP_019232111.1|4.6e-292|PREDICTED: catalase isozyme 1 [Nicotiana attenuata]
Solyc03g116680.2	42.25	32.326	-0.419184	0.0268517	XP_004235957.1|3.9e-225|methyl-CpG-binding domain-containing protein 11-like [Solanum lycopersicum]
Solyc09g059430.2	47.05	36.113	-0.419419	0.00203041	XP_010326285.1|1.2e-153|RPM1-interacting protein 4 isoform X2 [Solanum lycopersicum]
Solyc03g031750.1	64.023	49.37	-0.419455	0.00693946	XP_004234483.1|7.6e-111|vacuolar protein sorting-associated protein 28 homolog 2-like [Solanum lycopersicum]
Solyc00g007300.2	7.72	5.886	-0.419495	0.0471934	XP_004253249.1|0.0e+00|plant intracellular Ras-group-related LRR protein 4 [Solanum lycopersicum]
Solyc07g065520.2	27.606	21.17	-0.41962	0.00473658	XP_004244046.1|0.0e+00|cleavage and polyadenylation specificity factor subunit 6-like [Solanum lycopersicum]
Solyc06g005160.2	761.35	586.103	-0.419772	3.80134e-09	NP_001234782.1|2.4e-144|cytosolic ascorbate peroxidase 1 [Solanum lycopersicum]
Solyc05g054860.1	11.27	8.61	-0.419783	0.0179774	XP_004239762.1|0.0e+00|receptor-like protein kinase HERK 1 [Solanum lycopersicum]
Solyc10g007480.2	110.603	84.78	-0.42029	5.87761e-07	XP_004248232.1|0.0e+00|trifunctional UDP-glucose 4,6-dehydratase/UDP-4-keto-6-deoxy-D-glucose 3,5-epimerase/UDP-4-keto-L-rhamnose-reductase RHM3 [Solanum lycopersicum]
Solyc07g041280.2	18.66	14.29	-0.420333	0.0109988	XP_004243725.1|4.6e-209|omega-amidase, chloroplastic-like [Solanum lycopersicum]
Solyc06g053400.2	57.55	44.123	-0.420551	4.51342e-05	NP_001306252.1|0.0e+00|2-isopropylmalate synthase B [Solanum lycopersicum]
Solyc03g118620.2	10.963	8.373	-0.42115	0.00157846	XP_004235754.1|0.0e+00|uncharacterized protein LOC101264912 isoform X1 [Solanum lycopersicum]
Solyc08g075470.2	38.476	29.476	-0.421626	0.00268637	XP_004246006.1|3.5e-217|WAT1-related protein At4g19185-like [Solanum lycopersicum]
Solyc03g005320.2	9.986	7.613	-0.422073	0.0366601	XP_016566578.1|8.8e-266|PREDICTED: 3-ketoacyl-CoA synthase 20-like [Capsicum annuum]
Solyc10g061960.1	28.986	22.193	-0.422408	0.00311019	XP_004248983.1|9.6e-298|uncharacterized protein LOC101257910 [Solanum lycopersicum]
Solyc03g033970.1	15	11.486	-0.422711	0.0111557	XP_004234551.1|1.3e-173|isoflavone reductase homolog A622-like [Solanum lycopersicum]
Solyc01g108500.2	547.15	419.433	-0.422776	5.96259e-08	XP_004230808.1|5.5e-241|polyadenylate-binding protein RBP47 [Solanum lycopersicum]
Solyc12g010790.1	81.486	62.773	-0.42299	0.000510182	XP_004251797.1|7.4e-117|ras-related protein RABA1f [Solanum lycopersicum]
Solyc09g047870.2	15.616	11.953	-0.423978	0.00895846	XP_019071274.1|2.6e-131|uncharacterized protein LOC101262851 isoform X6 [Solanum lycopersicum]
Solyc06g051430.2	27.19	20.82	-0.425432	0.000453956	XP_004240935.1|4.2e-227|protein POLLEN DEFECTIVE IN GUIDANCE 1 [Solanum lycopersicum]
Solyc05g015980.2	61.453	46.91	-0.42598	0.000456625	XP_004239246.1|2.0e-194|uncharacterized protein LOC101253897 [Solanum lycopersicum]
Solyc08g077210.2	101.866	77.656	-0.428708	7.33081e-05	NP_001234789.1|0.0e+00|inositol-1,4,5-triphosphate-5-phosphatase [Solanum lycopersicum]
Solyc06g075630.2	204.593	156.066	-0.429117	0.000818671	XP_004241252.1|5.9e-182|dirigent protein 25 isoform X2 [Solanum lycopersicum]
Solyc01g103960.2	8	6.08	-0.429545	0.00222724	XP_004231337.1|0.0e+00|ATP-dependent DNA helicase Q-like 4A [Solanum lycopersicum]
Solyc07g066220.2	64.23	48.86	-0.429849	0.000346005	NP_001300945.1|0.0e+00|WRKY transcription factor 2 [Solanum lycopersicum]
Solyc02g084790.2	214.186	163.253	-0.430192	2.49772e-05	XP_004232441.1|5.8e-187|peroxidase 72 [Solanum lycopersicum]
Solyc12g096560.1	141.763	108.1	-0.430413	2.38436e-06	XP_009770744.1|3.6e-249|PREDICTED: apyrase 2-like [Nicotiana sylvestris]
Solyc11g011990.1	17.136	13.013	-0.431024	0.0455371	NP_001234511.1|1.3e-217|plastid quinol oxidase [Solanum lycopersicum]
Solyc04g026030.2	36.573	27.796	-0.431529	0.00406052	XP_004237263.1|5.8e-179|spermidine synthase 1 [Solanum lycopersicum]
Solyc05g010140.2	14.73	11.166	-0.431665	0.00554422	XP_004238983.1|0.0e+00|proline-rich receptor-like protein kinase PERK9 [Solanum lycopersicum]
Solyc12g098790.1	420.323	315.566	-0.43222	0.00415518	XP_025884459.1|4.2e-43|extensin-2-like, partial [Solanum lycopersicum]
Solyc02g070080.2	11.21	8.386	-0.43267	0.0487734	XP_004233151.1|6.8e-206|hyoscyamine 6-dioxygenase-like [Solanum lycopersicum]
Solyc02g063020.1	22.686	17.216	-0.433163	0.00222249	XP_004233504.1|8.9e-269|protein spinster-like [Solanum lycopersicum]
Solyc12g049220.1	47.326	36.186	-0.433495	0.00914283	XP_004252391.1|1.1e-100|mitochondrial import inner membrane translocase subunit TIM23-2 [Solanum lycopersicum]
Solyc07g066310.2	101.376	77.26	-0.433667	0.0178963	NP_001234042.1|2.4e-71|photosystem II 10 kDa polypeptide, chloroplastic [Solanum lycopersicum]
Solyc04g081590.2	53.246	40.336	-0.433998	4.52917e-05	XP_004238370.1|0.0e+00|receptor protein kinase CLAVATA1 [Solanum lycopersicum]
Solyc12g057150.1	253.763	196.693	-0.43479	0.0010238	XP_015060193.1|3.9e-48|classical arabinogalactan protein 9-like [Solanum pennellii]
Solyc06g069120.2	410.016	311.536	-0.435025	0.00149498	XP_004241628.1|2.1e-103|uncharacterized protein LOC101268114 [Solanum lycopersicum]
Solyc12g089380.1	22.553	17.116	-0.435178	0.0466712	NP_001234359.1|4.0e-154|expansin precursor [Solanum lycopersicum]
Solyc05g052490.2	15.803	11.956	-0.435226	0.00405707	XP_015076175.1|0.0e+00|probable apyrase 7 [Solanum pennellii]
Solyc08g074490.2	50.766	38.566	-0.43525	0.00131811	XP_004246066.3|4.0e-239|uncharacterized protein At4g15970 [Solanum lycopersicum]
Solyc08g059730.1	5.826	4.386	-0.435402	0.0426725	XP_004245022.1|0.0e+00|G-type lectin S-receptor-like serine/threonine-protein kinase SD2-5 [Solanum lycopersicum]
Solyc02g030080.2	56.013	42.49	-0.435499	2.78899e-07	XP_004231570.1|0.0e+00|WD repeat-containing protein 43 [Solanum lycopersicum]
Solyc10g008130.2	37.353	28.36	-0.435663	0.000367317	XP_004248182.1|2.7e-136|pre-rRNA-processing protein ESF2 [Solanum lycopersicum]
Solyc01g079960.2	57.656	43.74	-0.436403	5.75887e-06	XP_004229432.1|8.0e-258|basic 7S globulin-like [Solanum lycopersicum]
Solyc12g038670.1	18.526	14.016	-0.436768	0.00329345	XP_004252254.1|6.3e-300|O-fucosyltransferase 21-like [Solanum lycopersicum]
Solyc09g010200.2	41.123	31.216	-0.437092	0.00150813	XP_004246481.1|1.3e-112|casparian strip membrane protein 1-like [Solanum lycopersicum]
Solyc02g069750.1	19.523	15.003	-0.437199	0.0313174	XP_025885114.1|1.3e-272|probable choline kinase 2 isoform X4 [Solanum lycopersicum]
Solyc09g075940.2	15.616	11.783	-0.437641	0.0101191	XP_019071128.1|0.0e+00|uncharacterized protein LOC101254423 [Solanum lycopersicum]
Solyc02g087780.2	17.676	13.363	-0.437855	0.0100611	NP_001353795.1|1.7e-209|aldose 1-epimerase superfamily protein precursor [Solanum lycopersicum]
Solyc05g052470.2	42.753	32.383	-0.438399	0.00253338	XP_004239952.1|4.6e-141|ferritin-2, chloroplastic [Solanum lycopersicum]
Solyc01g028860.2	241.73	182.963	-0.439104	4.08316e-09	XP_004228948.1|0.0e+00|uncharacterized protein LOC101253713 [Solanum lycopersicum]
Solyc01g100390.2	10.706	8.046	-0.440327	0.00854028	XP_006344755.1|0.0e+00|PREDICTED: pyrophosphate-energized vacuolar membrane proton pump 1-like [Solanum tuberosum]
Solyc11g012460.1	48.636	36.733	-0.440359	0.000628936	XP_004250277.1|4.7e-116|ras-related protein RABA5a [Solanum lycopersicum]
Solyc10g011910.2	29.03	21.94	-0.440431	0.0133903	XP_004248063.1|1.7e-182|WRKY transcription factor 22-like [Solanum lycopersicum]
Solyc08g005970.2	76.396	57.69	-0.440938	2.70436e-07	XP_004244454.1|0.0e+00|protein arginine N-methyltransferase 1.5 [Solanum lycopersicum]
Solyc07g056390.2	30.08	22.703	-0.440939	0.00100984	XP_004243200.1|5.0e-283|endoplasmic reticulum oxidoreductin-1 [Solanum lycopersicum]
Solyc01g111660.2	290.013	219.88	-0.441183	5.99121e-06	NP_001266257.2|3.7e-161|plasmamembrane intrinsic protein 2.8 [Solanum lycopersicum]
Solyc12g098780.1	320.95	242.39	-0.441694	0.000116748	XP_025884598.1|0.0e+00|extensin-2-like, partial [Solanum lycopersicum]
Solyc03g059250.2	44.153	33.326	-0.441981	7.82261e-05	XP_004234790.1|0.0e+00|serine/threonine-protein kinase Nek6-like [Solanum lycopersicum]
Solyc01g094940.2	55.9	42.196	-0.442198	5.02863e-05	XP_004229894.1|8.0e-292|probable serine/threonine-protein kinase At1g01540 [Solanum lycopersicum]
Solyc08g008290.2	104.043	78.8	-0.442207	1.22312e-05	NP_001234113.1|9.3e-165|uncharacterized protein LOC778318 precursor [Solanum lycopersicum]
Solyc02g078460.2	83.766	63.283	-0.4423	0.00293303	NP_001333355.1|4.2e-146|abscisic acid-insensitive RING protein 4-like [Solanum lycopersicum]
Solyc01g106200.1	36.116	27.353	-0.442607	0.000262732	XP_004231372.1|1.9e-111|oligopeptide transporter 4 [Solanum lycopersicum]
Solyc12g006320.1	51.336	38.713	-0.442667	2.18902e-05	XP_004251555.1|0.0e+00|DEAD-box ATP-dependent RNA helicase 53, mitochondrial [Solanum lycopersicum]
Solyc01g105090.2	12.646	9.49	-0.443534	0.0484034	XP_004230596.1|6.4e-216|uncharacterized CRM domain-containing protein At3g25440, chloroplastic [Solanum lycopersicum]
Solyc01g087970.2	16.16	12.153	-0.443626	0.00676822	XP_004229673.1|3.0e-301|serine carboxypeptidase-like 40 [Solanum lycopersicum]
Solyc04g076040.2	28.946	21.82	-0.443803	0.00220009	XP_004237975.1|8.9e-201|cyclin-D2-1 [Solanum lycopersicum]
Solyc09g011880.2	47.976	36.17	-0.445098	3.2776e-05	XP_004246359.1|2.5e-260|protein SSUH2 homolog isoform X2 [Solanum lycopersicum]
Solyc03g007530.2	4.393	3.29	-0.445467	0.00551759	XP_016564469.1|0.0e+00|PREDICTED: ABC transporter C family member 10 [Capsicum annuum]
Solyc03g031420.1	19.32	14.506	-0.445725	0.00323341	XP_004234465.1|0.0e+00|molybdenum cofactor sulfurase-like [Solanum lycopersicum]
Solyc09g009020.2	763.313	569.76	-0.445829	6.28713e-06	NP_001234080.1|6.6e-254|enolase [Solanum lycopersicum]
Solyc06g060830.2	11.206	8.393	-0.446221	0.0470837	XP_004241991.1|2.2e-173|homeobox-leucine zipper protein HAT4 [Solanum lycopersicum]
Solyc10g050860.1	174.386	131.643	-0.446272	6.67765e-09	NP_001234487.2|1.3e-250|DNA-binding protein isoform 1 [Solanum lycopersicum]
BGI_novel_G000675	94.82	71.78	-0.447233	0.000374184
Solyc01g103580.2	28.8	20.726	-0.447823	0.0128163	XP_004230455.1|1.1e-122|protein DMP3 [Solanum lycopersicum]
Solyc08g081160.2	39.106	29.393	-0.447959	1.77022e-06	XP_004245598.1|0.0e+00|uncharacterized protein LOC101256207 [Solanum lycopersicum]
Solyc12g008930.1	19.156	14.923	-0.448036	0.00866522	XP_004251673.2|4.0e-25|putative transcription factor bHLH041 [Solanum lycopersicum]
Solyc01g106690.2	38.693	29.073	-0.448362	0.000111933	XP_004230673.1|7.0e-255|uncharacterized protein LOC101258701 [Solanum lycopersicum]
Solyc05g009790.1	74.74	56.156	-0.448427	0.00147596	NP_001307390.1|4.6e-226|transcription factor RELATED TO ABI3/VP1 2 [Solanum lycopersicum]
Solyc03g119930.1	23.94	17.946	-0.449037	0.00915251	XP_004235726.1|5.7e-260|molybdate transporter 2 [Solanum lycopersicum]
Solyc04g007270.2	14.66	10.97	-0.449251	0.00325809	XP_004236973.1|0.0e+00|PHD finger protein At1g33420 [Solanum lycopersicum]
Solyc06g069560.1	44.93	32.986	-0.449358	2.15878e-05	XP_004241596.1|1.7e-250|uncharacterized protein LOC101258762 [Solanum lycopersicum]
Solyc01g095790.2	78.67	59.103	-0.449563	7.32165e-05	XP_004231217.1|6.3e-272|replication stress response regulator SDE2 [Solanum lycopersicum]
Solyc08g066590.2	80.383	60.2	-0.449986	0.00781749	XP_004245394.1|2.2e-305|uncharacterized protein LOC101250532 [Solanum lycopersicum]
Solyc03g026240.2	15.75	10.77	-0.450041	0.0021288	XP_004234353.1|3.0e-186|serine/arginine-rich splicing factor RS31 isoform X1 [Solanum lycopersicum]
Solyc01g110430.2	31.05	23.203	-0.450094	0.00385279	NP_001234649.2|0.0e+00|arginine decarboxylase [Solanum lycopersicum]
Solyc06g050790.2	8.543	6.37	-0.450301	0.0461466	XP_015077484.1|7.5e-243|amino acid transporter AVT6C-like [Solanum pennellii]
Solyc06g007130.2	46.716	35.03	-0.450652	0.00158076	XP_025887067.1|1.1e-215|omega-3 fatty acid desaturase isoform X1 [Solanum lycopersicum]
Solyc03g026020.2	76.256	57.1	-0.450698	0.00889604	XP_004234371.1|8.8e-196|heat stress transcription factor B-2a [Solanum lycopersicum]
Solyc01g110060.2	12.416	9.376	-0.450986	0.0114939	XP_009777042.1|1.6e-264|PREDICTED: purple acid phosphatase 2 isoform X2 [Nicotiana sylvestris]
Solyc02g077750.2	166.293	125.146	-0.451221	0.0009179	XP_015066086.1|6.6e-41|protein DEHYDRATION-INDUCED 19-like [Solanum pennellii]
Solyc04g081290.2	12.156	9.076	-0.451483	0.0413964	NP_001311431.1|4.2e-124|cytokinin riboside 5'-monophosphate phosphoribohydrolase LOG1 [Solanum lycopersicum]
Solyc12g017960.1	139.93	107.963	-0.452787	0.0111557	XP_015166693.1|9.5e-39|PREDICTED: uncharacterized protein LOC107061619 [Solanum tuberosum]
Solyc06g035450.2	389.883	291.886	-0.453341	1.76514e-08	XP_004240751.1|2.2e-223|DEAD-box ATP-dependent RNA helicase 7 [Solanum lycopersicum]
Solyc11g016990.1	26.523	19.823	-0.453521	0.00512074	XP_004250366.2|5.6e-202|protein-tyrosine-phosphatase PTP1 [Solanum lycopersicum]
Solyc01g094660.2	17.74	13.246	-0.453745	0.00180466	XP_004229888.1|0.0e+00|U-box domain-containing protein 33 isoform X1 [Solanum lycopersicum]
Solyc01g102700.2	101.08	75.61	-0.4542	3.51737e-06	XP_004230391.1|0.0e+00|probable leucine-rich repeat receptor-like protein kinase At5g49770 [Solanum lycopersicum]
Solyc01g102310.2	153.68	115.006	-0.454233	8.34743e-06	XP_004230369.1|0.0e+00|probable serine/threonine-protein kinase kinX isoform X1 [Solanum lycopersicum]
Solyc10g006240.2	32.553	24.38	-0.454667	0.00360897	XP_006352515.1|4.2e-133|PREDICTED: proline synthase co-transcribed bacterial homolog protein-like [Solanum tuberosum]
Solyc01g095030.2	14.466	10.796	-0.454699	0.0138622	NP_001340693.1|4.8e-191|R1-MYB type transcription factor ARS1 [Solanum lycopersicum]
Solyc07g007430.2	53.98	40.39	-0.455076	3.42474e-05	XP_019183894.1|1.3e-311|PREDICTED: protein S-acyltransferase 24-like [Ipomoea nil]
BGI_novel_G000543	6.846	5.093	-0.455647	0.00771457
Solyc09g064940.2	66.163	49.436	-0.456533	0.000644292	XP_010326359.1|1.8e-169|uncharacterized protein LOC101252813 isoform X1 [Solanum lycopersicum]
Solyc05g016060.2	199.556	149.81	-0.45683	0.00144482	XP_004239248.1|1.1e-36|cysteine-rich and transmembrane domain-containing protein WIH1 [Solanum lycopersicum]
Solyc07g066330.2	35.303	26.393	-0.457063	0.000388524	XP_004243993.1|2.7e-203|NAC domain-containing protein 21/22 isoform X1 [Solanum lycopersicum]
Solyc06g074230.2	39.403	29.406	-0.458413	0.012332	XP_004242111.1|3.2e-110|casparian strip membrane protein 3-like [Solanum lycopersicum]
Solyc09g009840.1	34.92	26.126	-0.458701	0.00202308	XP_010325902.1|4.5e-162|uncharacterized protein LOC101254416 [Solanum lycopersicum]
Solyc03g082870.2	6.303	4.703	-0.458814	0.00936524	XP_004234989.1|0.0e+00|uncharacterized protein LOC101265109 [Solanum lycopersicum]
Solyc09g007550.2	28.056	20.913	-0.459285	0.000123441	XP_004246670.1|6.8e-276|zinc finger protein JACKDAW isoform X1 [Solanum lycopersicum]
Solyc06g053910.2	18.08	13.473	-0.459363	0.000946597	XP_004241036.1|3.0e-209|uncharacterized protein LOC101256680 [Solanum lycopersicum]
Solyc12g089370.1	37.336	27.846	-0.459786	0.00458848	XP_004252838.2|4.8e-181|peroxidase 64-like [Solanum lycopersicum]
Solyc02g083290.2	39.606	29.43	-0.460034	0.00399171	NP_001266007.1|0.0e+00|Hop-interacting protein THI135 [Solanum lycopersicum]
Solyc04g011510.2	1094.5	817.883	-0.460696	0.000185704	XP_004236746.1|1.1e-130|triosephosphate isomerase, cytosolic [Solanum lycopersicum]
Solyc03g019790.2	18.813	13.973	-0.461296	0.0120247	NP_001233971.2|1.3e-247|alpha-galactosidase precursor [Solanum lycopersicum]
Solyc06g007170.2	68.126	50.766	-0.461431	9.52019e-05	XP_004240405.1|9.4e-259|protein PMR5 [Solanum lycopersicum]
Solyc10g079930.1	13.976	10.346	-0.461682	0.0287626	XP_004249235.1|8.1e-256|zeatin O-glucosyltransferase [Solanum lycopersicum]
Solyc12g068070.1	27.976	20.24	-0.462335	8.56218e-05	XP_010314562.1|0.0e+00|filament-like plant protein 3 [Solanum lycopersicum]
Solyc01g006580.2	137.54	102.256	-0.462975	0.00652328	XP_004228709.1|2.6e-186|probable inactive 2-oxoglutarate-dependent dioxygenase AOP2 [Solanum lycopersicum]
Solyc08g078950.2	379.136	281.24	-0.463051	0.00218947	XP_004245746.1|0.0e+00|protein NRT1/ PTR FAMILY 6.3 [Solanum lycopersicum]
Solyc01g006840.2	26.83	19.933	-0.463697	0.000683685	XP_006348435.2|0.0e+00|PREDICTED: calcium-dependent protein kinase 26-like [Solanum tuberosum]
Solyc04g078400.2	24.706	18.34	-0.463797	0.00337599	NP_001308405.1|6.0e-190|MRG family protein [Solanum lycopersicum]
Solyc02g093710.1	56.626	42.376	-0.464218	0.00660149	NP_001266223.1|3.4e-113|Hop-interacting protein THI031 [Solanum lycopersicum]
Solyc11g073010.1	9.036	6.67	-0.464332	0.0275202	XP_004251304.1|0.0e+00|exocyst complex component EXO70H1 [Solanum lycopersicum]
Solyc08g006590.1	31.706	23.596	-0.464339	0.0100317	XP_015083349.1|1.0e-155|protein ENHANCED DISEASE RESISTANCE 2-like [Solanum pennellii]
Solyc10g081350.1	36.686	27.28	-0.465603	0.00237763	XP_004249361.1|1.2e-196|ABSCISIC ACID-INSENSITIVE 5-like protein 2 [Solanum lycopersicum]
Solyc01g106570.2	18.793	13.713	-0.465874	0.00310299	XP_010315166.1|2.6e-243|DUF21 domain-containing protein At4g33700 isoform X1 [Solanum lycopersicum]
Solyc12g088530.1	14.276	10.553	-0.466083	0.041722	XP_004252747.1|7.4e-199|putative cyclin-A3-1 [Solanum lycopersicum]
Solyc04g076460.2	13.42	9.92	-0.466224	0.0166772	PHT50837.1|1.6e-249|hypothetical protein CQW23_10584 [Capsicum baccatum]
Solyc07g053220.1	22.276	16.49	-0.46721	0.000574513	XP_004243414.1|0.0e+00|G-type lectin S-receptor-like serine/threonine-protein kinase At2g19130 [Solanum lycopersicum]
Solyc08g067950.2	115.416	86.076	-0.467414	3.6949e-06	XP_004245242.1|9.4e-87|uncharacterized protein LOC101252799 [Solanum lycopersicum]
Solyc06g071060.1	21.176	15.673	-0.467951	0.0274776	XP_004241565.1|6.6e-144|NADPH-dependent aldehyde reductase-like protein, chloroplastic [Solanum lycopersicum]
Solyc02g064960.2	18.283	13.526	-0.467972	0.000293256	NP_001233908.2|1.3e-303|APETALA2-like protein AP2b [Solanum lycopersicum]
Solyc09g074670.2	21.033	15.556	-0.46824	1.26261e-05	XP_004247543.2|0.0e+00|uncharacterized protein LOC101260375 isoform X3 [Solanum lycopersicum]
Solyc05g006550.2	22.386	16.573	-0.468451	1.49843e-05	XP_004238736.1|0.0e+00|TORTIFOLIA1-like protein 4 [Solanum lycopersicum]
Solyc04g015500.2	20.413	15.09	-0.469377	0.0159621	XP_025886410.1|2.9e-126|B3 domain-containing protein At1g49475 isoform X1 [Solanum lycopersicum]
Solyc09g089560.2	12.896	9.47	-0.469434	0.00392961	XP_010326745.1|0.0e+00|TNF receptor-associated factor homolog 1b-like isoform X3 [Solanum lycopersicum]
Solyc03g113380.2	12.193	9.056	-0.469509	0.000175048	XP_004236182.1|0.0e+00|pentatricopeptide repeat-containing protein At1g74750-like [Solanum lycopersicum]
Solyc10g084970.1	72.04	53.346	-0.469847	0.00163326	XP_004249549.1|7.8e-234|uncharacterized protein LOC101266378 isoform X1 [Solanum lycopersicum]
Solyc01g096500.2	42.713	31.596	-0.47066	1.45292e-07	XP_004230034.1|0.0e+00|sphingoid long-chain bases kinase 1 [Solanum lycopersicum]
Solyc10g083710.1	9.763	7.11	-0.470912	0.0323541	XP_004249464.1|1.1e-244|probable 3-deoxy-D-manno-octulosonic acid transferase, mitochondrial isoform X1 [Solanum lycopersicum]
Solyc12g094490.1	26.29	19.39	-0.470943	0.000657576	XP_004253131.1|0.0e+00|polyadenylation and cleavage factor homolog 4 isoform X2 [Solanum lycopersicum]
Solyc05g055110.2	20.29	14.943	-0.471428	0.00238731	XP_004240192.1|0.0e+00|nuclear pore complex protein NUP1-like [Solanum lycopersicum]
Solyc03g032040.2	84.116	62.2	-0.471646	7.08517e-05	NP_001280690.1|0.0e+00|monosaccharide-sensing protein 2-like [Solanum lycopersicum]
Solyc07g009490.2	46.89	34.866	-0.472506	9.83681e-07	XP_004242864.1|1.3e-250|ethanolamine-phosphate cytidylyltransferase [Solanum lycopersicum]
Solyc01g081060.2	197.196	145.756	-0.472583	0.00182652	NP_001234470.2|3.2e-207|xyloglucan endotransglucosylase-hydrolase precursor [Solanum lycopersicum]
Solyc07g049200.2	13.746	10.11	-0.472609	0.0378996	XP_004243530.1|4.5e-140|uncharacterized protein LOC101247442 isoform X2 [Solanum lycopersicum]
Solyc01g099810.2	10.433	7.753	-0.472728	0.00747047	XP_004230248.1|1.7e-140|serine/arginine-rich splicing factor SR30 isoform X1 [Solanum lycopersicum]
Solyc08g079080.2	22.986	16.906	-0.472801	0.009252	XP_015083954.1|0.0e+00|acid beta-fructofuranosidase 2, vacuolar [Solanum pennellii]
Solyc09g011140.2	48.563	35.936	-0.472901	0.000544953	XP_004246428.1|2.8e-152|tropinone reductase homolog isoform X1 [Solanum lycopersicum]
Solyc05g055440.1	600.4	450.693	-0.473036	2.29746e-07	XP_004239714.1|8.1e-75|histone H2B.3-like [Solanum lycopersicum]
Solyc09g082500.2	26.513	19.55	-0.474437	5.04551e-06	XP_004247675.2|0.0e+00|protein tesmin/TSO1-like CXC 2 isoform X1 [Solanum lycopersicum]
Solyc05g012110.2	77.15	57.083	-0.475552	0.0216204	XP_004239036.1|7.7e-149|probable 6-phosphogluconolactonase 1 [Solanum lycopersicum]
Solyc01g067620.2	16.063	11.846	-0.475849	0.00725877	XP_010321064.1|4.4e-212|protein SRG1 isoform X1 [Solanum lycopersicum]
Solyc08g042000.2	5	3.66	-0.476663	0.014787	NP_001266250.1|0.0e+00|sucrose-phosphate synthase A2 [Solanum lycopersicum]
Solyc01g005570.2	37.606	27.736	-0.477502	0.000447728	NP_001352379.1|4.1e-78|uncharacterized protein LOC113002611 [Solanum lycopersicum]
Solyc08g068730.1	163.553	120.5	-0.477907	0.0176376	NP_001234877.1|1.1e-131|N-hydroxycinnamoyl-CoA:tyramine N-hydroxycinnamoyl transferase THT1-3 [Solanum lycopersicum]
Solyc07g006280.2	145.023	106.886	-0.478172	3.435e-08	NP_001335374.1|1.1e-156|tetraspanin-8-like protein [Solanum lycopersicum]
Solyc02g092990.1	28.593	20.986	-0.479114	0.000365361	XP_004231878.1|0.0e+00|F-box protein SKIP2 [Solanum lycopersicum]
Solyc08g080690.2	28.973	21.27	-0.479195	9.49786e-07	PHT58053.1|0.0e+00|hypothetical protein CQW23_00416 [Capsicum baccatum]
Solyc02g084240.2	131.203	96.39	-0.480247	0.0104762	XP_015067158.1|3.1e-109|histone H1 [Solanum pennellii]
Solyc11g040040.1	14.343	10.513	-0.480477	0.00383022	XP_004250695.1|2.1e-303|BTB/POZ domain-containing protein At3g19850 [Solanum lycopersicum]
Solyc10g078670.1	23.8	17.47	-0.48048	0.00101868	XP_004249162.1|4.6e-284|bZIP transcription factor TGA10-like [Solanum lycopersicum]
Solyc01g067360.2	18.713	13.67	-0.480683	0.0420374	XP_004229216.1|2.1e-170|E3 ubiquitin-protein ligase MIEL1 isoform X2 [Solanum lycopersicum]
Solyc04g009770.2	506.86	372.86	-0.480837	4.08208e-06	XP_004236804.1|2.4e-249|dnaJ protein homolog isoform X1 [Solanum lycopersicum]
Solyc06g073190.2	1137.03	836.743	-0.481069	6.5638e-07	NP_001233888.1|6.0e-183|fructokinase-2 [Solanum lycopersicum]
Solyc00g009110.2	66.893	49.673	-0.481284	6.23138e-06	XP_010314903.1|0.0e+00|inositol-1,4,5-triphosphate-5-phosphatase isoform X4 [Solanum lycopersicum]
Solyc02g082340.2	111.646	81.956	-0.481378	7.58428e-06	XP_004232589.1|0.0e+00|RNA polymerase I-specific transcription initiation factor RRN3 [Solanum lycopersicum]
Solyc12g056410.1	23.843	17.496	-0.482174	0.00775579	XP_004252592.1|2.0e-170|F-box protein PP2-A13-like [Solanum lycopersicum]
Solyc01g109470.2	88.14	64.676	-0.482555	0.00376639	XP_004230963.1|2.8e-151|BURP domain protein USPL1 [Solanum lycopersicum]
Solyc07g056350.2	39.586	28.996	-0.483471	3.13239e-06	XP_015082331.1|0.0e+00|mitogen-activated protein kinase 20 isoform X1 [Solanum pennellii]
Solyc10g005260.2	96.716	70.986	-0.483993	2.71724e-08	XP_010327241.1|4.4e-248|polyadenylate-binding protein RBP45-like isoform X1 [Solanum lycopersicum]
Solyc10g080460.1	32.856	23.23	-0.484608	0.000941693	XP_004249281.1|1.2e-215|uncharacterized protein LOC101261766 isoform X1 [Solanum lycopersicum]
Solyc05g005670.1	8.703	6.313	-0.485281	0.0293012	XP_004239352.1|0.0e+00|U-box domain-containing protein 19-like [Solanum lycopersicum]
Solyc05g012560.1	48.17	35.193	-0.485667	0.0303458	XP_004239073.1|8.6e-152|uncharacterized protein LOC101249456 [Solanum lycopersicum]
Solyc03g005730.2	81.446	59.656	-0.486306	5.50063e-08	XP_004234053.1|8.9e-299|3-isopropylmalate dehydratase large subunit, chloroplastic [Solanum lycopersicum]
Solyc01g090480.2	27.133	19.833	-0.486346	0.00101419	XP_025887405.1|6.2e-253|flowering locus K homology domain [Solanum lycopersicum]
Solyc04g078390.1	132.026	97.34	-0.486506	2.47627e-05	NP_001333987.1|2.0e-122|F-box protein GID2 [Solanum lycopersicum]
Solyc08g082310.2	29.53	21.59	-0.48693	0.000121023	XP_004245516.1|8.5e-235|putative RING-H2 finger protein ATL21A [Solanum lycopersicum]
Solyc06g071590.2	23.86	17.443	-0.487231	0.00123071	XP_004242161.1|2.0e-249|uncharacterized protein LOC101254705 [Solanum lycopersicum]
Solyc01g095630.2	42.336	30.903	-0.487511	0.000243272	NP_001234530.1|1.6e-191|WRKY transcription factor 41 [Solanum lycopersicum]
Solyc12g056650.1	122.406	88.68	-0.487853	3.51737e-06	XP_025884283.1|0.0e+00|protein GIGANTEA-like isoform X3 [Solanum lycopersicum]
Solyc03g097380.2	33.44	24.413	-0.4882	0.000514594	XP_004235318.1|3.3e-189|heavy metal-associated isoprenylated plant protein 7 [Solanum lycopersicum]
Solyc09g014900.2	7.276	5.27	-0.489317	0.0328258	NP_001234847.2|6.1e-289|cytochrome P450 71 family protein [Solanum lycopersicum]
Solyc02g088220.2	27.25	19.79	-0.491003	0.0015472	XP_015065900.1|0.0e+00|phosphate transporter PHO1 homolog 3-like [Solanum pennellii]
Solyc05g007220.2	9.873	7.126	-0.491595	0.000646663	XP_010320676.1|0.0e+00|F-box/kelch-repeat protein At1g26930 [Solanum lycopersicum]
Solyc08g006670.2	25.926	18.9	-0.49165	0.00504031	XP_004244509.1|3.8e-103|mediator of RNA polymerase II transcription subunit 30 [Solanum lycopersicum]
Solyc07g042000.2	5.66	4.086	-0.492871	0.0379526	XP_004243702.1|4.5e-188|cation/calcium exchanger 4-like [Solanum lycopersicum]
Solyc04g076780.2	25.06	18.44	-0.49295	6.05465e-05	XP_009615073.1|0.0e+00|PREDICTED: oligopeptide transporter 4-like [Nicotiana tomentosiformis]
Solyc12g010570.1	124.36	91.093	-0.493086	6.18464e-05	XP_004251785.1|5.7e-159|tetraspanin-8 [Solanum lycopersicum]
Solyc01g097920.2	54.966	40.086	-0.493889	4.40928e-06	XP_006347804.1|7.8e-170|PREDICTED: cysteine synthase-like [Solanum tuberosum]
Solyc04g074850.2	13.736	9.923	-0.49421	0.0342432	XP_004237959.1|4.5e-242|protein DETOXIFICATION 27-like [Solanum lycopersicum]
Solyc10g085660.1	14.31	10.216	-0.494231	0.00388834	XP_004249658.1|1.5e-67|F-box protein SKIP24 isoform X1 [Solanum lycopersicum]
Solyc05g008580.2	21.153	16.276	-0.494769	5.65048e-05	XP_004238876.1|4.2e-262|CDP-diacylglycerol--serine O-phosphatidyltransferase 1-like [Solanum lycopersicum]
Solyc03g111870.2	108.403	78.843	-0.495866	1.78512e-05	XP_004236287.1|2.1e-257|E3 ubiquitin-protein ligase RGLG2 [Solanum lycopersicum]
Solyc05g007790.2	27.82	20.216	-0.49652	0.0129438	XP_004238811.1|3.2e-94|casparian strip membrane protein 2 [Solanum lycopersicum]
Solyc01g111580.2	31.236	22.66	-0.496671	0.00313544	XP_004231042.1|5.8e-157|basic leucine zipper 23 [Solanum lycopersicum]
Solyc10g055230.1	223.82	164.376	-0.49698	1.29846e-06	XP_004248662.1|1.7e-101|dirigent protein 22 [Solanum lycopersicum]
Solyc07g032710.2	9.08	6.563	-0.497136	0.00442483	XP_004243156.1|0.0e+00|uncharacterized protein LOC101268699 [Solanum lycopersicum]
Solyc05g055870.2	19.1	13.843	-0.497525	0.00138508	XP_004239687.1|1.6e-179|putative F-box protein PP2-B12 [Solanum lycopersicum]
Solyc03g078370.1	6.54	4.7	-0.498968	0.0177303	XP_004235071.1|0.0e+00|G-type lectin S-receptor-like serine/threonine-protein kinase LECRK2 [Solanum lycopersicum]
Solyc08g006150.2	87.343	63.48	-0.499538	5.40348e-07	XP_004244472.1|3.2e-132|gamma-glutamylcyclotransferase 2-1 [Solanum lycopersicum]
Solyc03g113920.2	8.943	6.436	-0.501921	0.0180988	XP_004236142.1|0.0e+00|calmodulin-binding protein 60 A [Solanum lycopersicum]
Solyc02g030170.2	471.56	343.69	-0.501965	1.12882e-08	BAQ55272.1|0.0e+00|sterol side chain reductase [Solanum lycopersicum]
Solyc07g008190.2	50.813	36.763	-0.502224	7.89574e-06	XP_004242779.1|0.0e+00|nuclear pore complex protein NUP1 isoform X1 [Solanum lycopersicum]
Solyc07g015860.2	16.666	12.243	-0.502296	0.00137752	NP_001234703.1|3.3e-157|peptide deformylase 1A, chloroplastic [Solanum lycopersicum]
Solyc08g006740.2	105.263	76.09	-0.502372	2.43834e-05	NP_001233859.1|2.8e-277|aromatic amino acid decarboxylase 2 [Solanum lycopersicum]
Solyc09g063070.2	67.913	49.24	-0.502499	1.09432e-05	XP_004247113.1|6.2e-152|tetraspanin-20 [Solanum lycopersicum]
Solyc02g083400.2	21.723	15.66	-0.502762	0.0215186	XP_004232523.1|1.8e-133|NEP1-interacting protein-like 1 [Solanum lycopersicum]
Solyc04g009290.1	8.363	6.02	-0.503452	0.0042817	XP_019068820.1|0.0e+00|disease resistance protein RPP13-like [Solanum lycopersicum]
Solyc07g051840.2	11.666	8.41	-0.503667	0.00129268	XP_004243486.1|0.0e+00|probable WRKY transcription factor 31 [Solanum lycopersicum]
Solyc02g080510.1	29.896	21.62	-0.50421	0.0374856	XP_004232713.1|4.9e-118|uncharacterized protein LOC101253959 [Solanum lycopersicum]
Solyc12g010130.1	12.53	8.993	-0.50433	0.0236367	NP_001265891.2|2.5e-249|CBL-interacting protein kinase 6 [Solanum lycopersicum]
Solyc02g069830.2	15.586	11.173	-0.50448	7.38444e-05	XP_016559371.1|0.0e+00|PREDICTED: homeobox-leucine zipper protein ATHB-14 isoform X1 [Capsicum annuum]
Solyc03g121460.1	47.33	34.37	-0.504632	0.00885084	XP_004235608.1|6.7e-95|PRA1 family protein F3 [Solanum lycopersicum]
Solyc10g039290.1	14.476	10.456	-0.504644	0.00133719	XP_004248524.1|0.0e+00|protein NRT1/ PTR FAMILY 4.5 [Solanum lycopersicum]
Solyc02g085030.2	31.343	22.576	-0.506264	3.46266e-05	PHU27057.1|0.0e+00|Auxilin-like protein 1 [Capsicum chinense]
Solyc11g013130.1	222.383	165.22	-0.50633	0.00193929	XP_010312785.1|3.8e-62|uncharacterized protein LOC101250855 isoform X2 [Solanum lycopersicum]
Solyc12g056220.1	1691.06	1226.16	-0.506701	4.15948e-07	NP_001274291.1|2.2e-164|aquaporin PIP1-3 [Solanum lycopersicum]
Solyc06g082990.2	13.14	9.266	-0.507798	0.000851473	XP_019070050.1|1.5e-268|uncharacterized CRM domain-containing protein At3g25440, chloroplastic [Solanum lycopersicum]
Solyc11g006760.1	27.283	19.673	-0.508117	0.019942	XP_004249953.1|7.3e-148|multiple myeloma tumor-associated protein 2 homolog [Solanum lycopersicum]
Solyc07g066600.2	926.45	666.13	-0.50812	3.12874e-06	NP_001316520.1|3.1e-221|phosphoglycerate kinase [Solanum lycopersicum]
Solyc11g066290.1	17.916	12.88	-0.508672	0.00435526	XP_004250973.1|4.7e-231|probable inactive purple acid phosphatase 29 [Solanum lycopersicum]
Solyc12g005340.1	14.5	10.38	-0.509396	0.00574075	NP_001266225.1|0.0e+00|Hop-interacting protein THI039 [Solanum lycopersicum]
Solyc09g065880.2	14.053	10.076	-0.509935	0.00136976	XP_004247336.1|0.0e+00|F-box/LRR-repeat protein 17 [Solanum lycopersicum]
Solyc12g100120.1	30.946	22.256	-0.510088	1.56195e-06	XP_015061250.1|0.0e+00|uncharacterized protein LOC107007236 [Solanum pennellii]
Solyc06g073540.2	44.216	31.75	-0.510283	1.40885e-08	NP_001289847.1|0.0e+00|Argonaute 4B [Solanum lycopersicum]
Solyc10g081390.1	161.49	120.126	-0.510555	0.0109171
Solyc03g098730.1	25.806	18.53	-0.511237	0.0170807	XP_004235412.1|1.2e-136|kunitz trypsin inhibitor 2 [Solanum lycopersicum]
Solyc10g037880.1	57.433	41.71	-0.511489	0.00252431	XP_004248538.1|1.1e-91|mavicyanin-like [Solanum lycopersicum]
Solyc10g076500.1	6.426	4.586	-0.511592	0.0109647	XP_004249716.1|0.0e+00|receptor like protein 22-like [Solanum lycopersicum]
Solyc09g005080.1	13.823	9.91	-0.511706	4.39805e-05	NP_001234733.2|0.0e+00|verticillium wilt disease resistance protein Ve2 precursor [Solanum lycopersicum]
Solyc01g079350.2	49.126	35.24	-0.511722	0.000597545	XP_004229383.1|2.1e-311|uncharacterized protein LOC101265365 [Solanum lycopersicum]
Solyc11g061750.1	12.746	9.186	-0.512318	0.00200427	XP_019066613.1|0.0e+00|AP2-like ethylene-responsive transcription factor PLT2 [Solanum lycopersicum]
Solyc03g123620.2	58.683	42.16	-0.513009	3.48499e-06	XP_004235526.1|0.0e+00|pectinesterase 3 [Solanum lycopersicum]
Solyc02g084890.1	6.266	4.47	-0.513076	0.00616657	XP_004232433.1|0.0e+00|disease resistance RPP13-like protein 4 [Solanum lycopersicum]
Solyc06g070990.2	46.206	33.276	-0.514154	5.82674e-07	NP_001234773.2|0.0e+00|WRKY transcription factor 72b [Solanum lycopersicum]
Solyc09g064510.2	25.733	18.416	-0.515069	8.45265e-05	XP_019248187.1|4.4e-288|PREDICTED: probable aminopyrimidine aminohydrolase, mitochondrial isoform X2 [Nicotiana attenuata]
Solyc02g082270.2	85.306	57.796	-0.515414	0.000317	XP_025885249.1|5.0e-168|RNA-binding protein 24 isoform X1 [Solanum lycopersicum]
Solyc12g005010.1	34.893	25.013	-0.515773	2.7992e-06	XP_004251460.1|0.0e+00|uncharacterized protein LOC101256651 [Solanum lycopersicum]
Solyc05g051050.2	17.206	12.296	-0.515833	0.000706938	XP_004240041.1|4.1e-274|shaggy-related protein kinase epsilon [Solanum lycopersicum]
Solyc04g009740.2	33.566	24.036	-0.516584	7.44147e-06	XP_004236807.1|0.0e+00|exocyst complex component EXO70A1 isoform X2 [Solanum lycopersicum]
Solyc08g075540.2	12.833	9.123	-0.51681	0.0114023	NP_001234117.2|1.5e-210|alternative oxidase 1a [Solanum lycopersicum]
Solyc04g078820.2	74.19	53.223	-0.517331	6.66373e-06	XP_004238150.1|2.2e-176|annexin D5 [Solanum lycopersicum]
Solyc02g070890.2	11.1	7.91	-0.518113	0.000395956	XP_004233092.1|0.0e+00|LRR receptor-like serine/threonine-protein kinase FLS2 [Solanum lycopersicum]
Solyc01g080620.2	18.996	13.556	-0.518206	0.000106582	XP_004229489.1|0.0e+00|uncharacterized protein LOC101246086 [Solanum lycopersicum]
Solyc01g087020.2	125.563	90.583	-0.51864	1.73096e-06	PHU30281.1|7.0e-16|hypothetical protein BC332_02374 [Capsicum chinense]
Solyc03g007650.1	15.746	11.266	-0.518714	0.0243846	NP_001233892.2|1.9e-101|DnaJ like protein [Solanum lycopersicum]
Solyc10g045270.1	13.93	10.073	-0.519287	0.00690757	XP_010327514.1|2.0e-142|serine/threonine-protein kinase STY13 isoform X1 [Solanum lycopersicum]
Solyc08g067610.2	35.143	25.106	-0.519309	1.22149e-09	XP_015083661.1|0.0e+00|pleiotropic drug resistance protein 1-like [Solanum pennellii]
Solyc10g083760.1	118.43	84.736	-0.519409	3.73561e-07	NP_001234234.1|0.0e+00|chloroplast threonine deaminase 1 precursor [Solanum lycopersicum]
Solyc12g098520.1	55.99	39.956	-0.519511	0.00215365	XP_019067113.1|1.2e-276|heat stress transcription factor A-5 [Solanum lycopersicum]
Solyc09g091210.2	170.583	122.053	-0.520233	0.0003901	XP_019071018.1|4.4e-136|dirigent protein 16-like [Solanum lycopersicum]
Solyc02g087480.2	24.653	17.756	-0.520845	0.000258315	XP_004232250.1|6.0e-261|uncharacterized protein LOC101262766 [Solanum lycopersicum]
Solyc12g099900.1	30.513	21.78	-0.521586	7.97081e-05	XP_004252879.1|8.9e-269|scarecrow-like protein 3 [Solanum lycopersicum]
Solyc01g096860.1	7.696	5.126	-0.522833	0.00771647	XP_004231231.1|9.7e-257|ethylene-responsive transcription factor WRI1 [Solanum lycopersicum]
Solyc02g081040.2	6.62	4.53	-0.523549	0.00354066	NP_001234719.1|0.0e+00|LysM receptor-like kinase 11 precursor [Solanum lycopersicum]
Solyc04g014320.1	113.746	81.733	-0.523994	0.0177199	XP_015072926.1|4.0e-55|protein PELPK2-like [Solanum pennellii]
Solyc08g079930.1	564.29	401.733	-0.525166	1.16718e-05	XP_019070611.1|0.0e+00|subtilisin-like protease SBT1.7 [Solanum lycopersicum]
Solyc03g114750.2	17.513	12.433	-0.525358	0.0115302	XP_004236076.1|2.2e-143|uncharacterized protein LOC101262502 [Solanum lycopersicum]
Solyc10g085950.1	24.6	17.493	-0.525663	0.0109978	XP_004249666.1|2.8e-142|protein ALUMINUM SENSITIVE 3 [Solanum lycopersicum]
Solyc02g080640.2	66.88	47.323	-0.526416	0.00200427	NP_001233829.1|2.5e-268|adenylyl-sulfate reductase [Solanum lycopersicum]
Solyc09g074720.1	10.706	7.28	-0.527247	0.000121718	XP_010326601.1|2.6e-115|homeobox protein LUMINIDEPENDENS-like isoform X4 [Solanum lycopersicum]
Solyc01g090120.2	744.113	531.726	-0.528303	7.24841e-07	XP_004229737.1|1.3e-105|uclacyanin-3 [Solanum lycopersicum]
Solyc10g076920.1	8.376	5.98	-0.528665	0.0300428	XP_004249091.1|4.9e-153|ABSCISIC ACID-INSENSITIVE 5-like protein 2 [Solanum lycopersicum]
Solyc07g065110.1	300.113	217.123	-0.529154	0.0148036	XP_010324294.1|4.3e-54|putative lipid-transfer protein DIR1 [Solanum lycopersicum]
Solyc10g005300.2	8.263	5.796	-0.529206	0.042299	XP_004248400.1|2.6e-224|probable serine/threonine-protein kinase PBL23 [Solanum lycopersicum]
Solyc02g087850.1	32.783	23.28	-0.529269	6.28211e-05	XP_004232227.1|8.0e-253|uncharacterized protein At3g28850 [Solanum lycopersicum]
Solyc07g061940.2	54.316	38.533	-0.529615	1.84289e-05	XP_025888020.1|7.6e-308|uncharacterized protein LOC101253806 [Solanum lycopersicum]
Solyc01g102680.2	44.763	31.79	-0.530016	0.000131859	XP_010314121.1|0.0e+00|probable leucine-rich repeat receptor-like protein kinase At5g49770 [Solanum lycopersicum]
Solyc06g066370.2	48.926	34.636	-0.530033	8.55605e-06	NP_001306910.1|0.0e+00|WRKY transcription factor 31 [Solanum lycopersicum]
Solyc01g095430.2	11.193	7.866	-0.533317	0.0424403	XP_004229969.1|3.3e-86|protein CURVATURE THYLAKOID 1A, chloroplastic [Solanum lycopersicum]
Solyc03g116600.2	23.866	16.873	-0.534007	7.34924e-06	XP_004236027.1|8.2e-78|uncharacterized protein LOC101247418 [Solanum lycopersicum]
Solyc03g083470.2	11.253	7.93	-0.534035	0.000803917	XP_004235104.1|0.0e+00|rust resistance kinase Lr10 [Solanum lycopersicum]
Solyc10g083720.1	216.15	152.94	-0.534296	1.18344e-05	XP_004249465.1|1.0e-297|pyruvate kinase 2, cytosolic [Solanum lycopersicum]
Solyc05g007230.2	7.69	5.413	-0.534887	0.00111526	XP_004239381.1|0.0e+00|LRR receptor-like serine/threonine-protein kinase GSO1 [Solanum lycopersicum]
Solyc01g094700.2	10.696	7.51	-0.5357	0.0113476	PHU09582.1|2.3e-279|Glycerol-3-phosphate 2-O-acyltransferase 4 [Capsicum chinense]
Solyc11g012680.1	48.59	34.446	-0.535917	1.13334e-05	XP_004250292.1|1.1e-187|pollen-specific leucine-rich repeat extensin-like protein 1 [Solanum lycopersicum]
Solyc09g074690.2	16	11.176	-0.536323	4.65943e-05	XP_004247447.1|9.4e-158|homeobox protein LUMINIDEPENDENS [Solanum lycopersicum]
Solyc09g065340.2	14.003	9.836	-0.537179	0.000823968	XP_004247326.1|0.0e+00|uncharacterized protein LOC101262957 [Solanum lycopersicum]
Solyc03g113420.2	6.73	4.773	-0.537388	0.0333361	NP_001333239.1|0.0e+00|protein NRT1/ PTR FAMILY 2.11-like [Solanum lycopersicum]
Solyc02g087840.2	15.233	10.72	-0.537428	0.00505334	XP_004232228.2|5.7e-184|homeobox-leucine zipper protein ATHB-13 [Solanum lycopersicum]
Solyc05g009820.2	30.77	21.703	-0.538237	4.83151e-05	XP_004238964.1|5.1e-213|probable galacturonosyltransferase-like 3 [Solanum lycopersicum]
Solyc11g010380.1	9.06	6.313	-0.539781	0.0234244	XP_015058652.1|1.4e-288|protein DETOXIFICATION 27-like [Solanum pennellii]
Solyc09g007730.2	13.366	9.426	-0.540335	0.00751351	XP_004246662.1|2.3e-215|putative serine/threonine-protein kinase isoform X2 [Solanum lycopersicum]
Solyc06g061190.1	14.683	10.283	-0.54123	0.00996115	XP_019070125.1|5.5e-229|protein HAIKU1 [Solanum lycopersicum]
Solyc08g080310.1	19.63	13.746	-0.541626	0.000178102	XP_015084726.1|4.4e-282|protein DETOXIFICATION 49-like [Solanum pennellii]
Solyc04g054930.2	44.69	31.44	-0.541702	7.5046e-06	XP_004237406.1|2.0e-221|probable trehalose-phosphate phosphatase J [Solanum lycopersicum]
Solyc09g065430.2	43.343	30.42	-0.541995	0.0102628	XP_010326386.1|2.3e-99|protein YLS3 isoform X2 [Solanum lycopersicum]
Solyc04g074730.1	475.41	341.043	-0.542388	4.90885e-09	XP_004237948.1|4.0e-65|classical arabinogalactan protein 5 [Solanum lycopersicum]
Solyc12g005950.1	33.733	22.276	-0.542615	0.000280696	NP_001234047.2|0.0e+00|COP1 homolog [Solanum lycopersicum]
Solyc02g085130.2	6.556	4.566	-0.543424	0.0132464	XP_010316378.1|3.2e-236|tubby-like F-box protein 5 [Solanum lycopersicum]
Solyc02g068070.2	14.15	9.906	-0.543895	0.00331594	XP_004233301.1|3.8e-244|triacylglycerol lipase 2-like isoform X1 [Solanum lycopersicum]
Solyc05g056220.2	43.89	30.99	-0.544103	2.89489e-07	XP_004239657.1|0.0e+00|methyltransferase-like protein 1 [Solanum lycopersicum]
Solyc10g009310.2	34.703	24.366	-0.544344	8.03922e-05	XP_004248458.1|1.2e-309|cytochrome P450 78A6-like [Solanum lycopersicum]
Solyc07g053620.2	71.833	50.656	-0.545834	8.12427e-07	NP_001233892.2|2.3e-113|DnaJ like protein [Solanum lycopersicum]
Solyc08g065970.2	7.776	5.413	-0.547001	0.0115481	XP_004245130.1|0.0e+00|RNA polymerase sigma factor sigC isoform X1 [Solanum lycopersicum]
Solyc06g068870.2	15	10.486	-0.54701	0.000413441	NP_001274718.1|1.2e-311|transcription factor ICE1-like [Solanum lycopersicum]
Solyc07g009180.1	3.056	2.106	-0.547795	0.0485861	XP_004243044.2|0.0e+00|putative late blight resistance protein homolog R1B-16 [Solanum lycopersicum]
Solyc04g080560.2	48.836	34.44	-0.54781	0.0158704	XP_016501162.1|7.2e-17|PREDICTED: uncharacterized protein LOC107819557 [Nicotiana tabacum]
Solyc01g081600.2	57.09	40.1	-0.548059	0.00188603	XP_004229551.1|6.6e-63|non-specific lipid-transfer protein 1-like [Solanum lycopersicum]
Solyc02g071950.1	323.906	232.243	-0.548601	0.00855497	OIT36252.1|1.0e-20|hypothetical protein A4A49_04389 [Nicotiana attenuata]
Solyc06g062330.1	14.696	10.256	-0.549128	0.0252053	XP_025887516.1|1.6e-173|zeatin O-glucosyltransferase-like [Solanum lycopersicum]
Solyc02g084230.1	69.96	49.04	-0.55019	0.000123441	NP_001266243.1|8.8e-166|GAGA-binding transcriptional activator [Solanum lycopersicum]
Solyc05g012890.1	4.576	3.113	-0.550297	0.00327647	NP_001333428.1|0.0e+00|JJH-R-like protein [Solanum lycopersicum]
Solyc12g095890.1	47.646	33.276	-0.550313	2.11179e-07	PHT32615.1|0.0e+00|Nuclear poly(A) polymerase 4 [Capsicum baccatum]
Solyc10g081730.1	48.233	33.796	-0.550419	5.58973e-06	XP_025883522.1|1.6e-243|protein WVD2-like 4 [Solanum lycopersicum]
Solyc09g009520.2	69.593	48.706	-0.550555	2.06762e-07	XP_004246536.1|6.1e-223|uncharacterized protein LOC101260854 [Solanum lycopersicum]
Solyc06g060700.1	43.12	30.74	-0.551358	0.00774077	XP_015077352.1|2.6e-33|non-functional pseudokinase ZED1-like [Solanum pennellii]
Solyc06g050130.2	30	20.97	-0.551502	1.02315e-05	XP_010322133.1|3.5e-256|alpha-galactosidase 3 [Solanum lycopersicum]
Solyc03g118470.2	33.18	22.893	-0.55253	0.0200752	XP_010318659.1|5.6e-135|nudix hydrolase 18, mitochondrial isoform X2 [Solanum lycopersicum]
Solyc07g043150.1	65.366	45.553	-0.552789	0.00101878	XP_004243652.1|6.2e-281|anthocyanidin 3-O-glucosyltransferase 2 [Solanum lycopersicum]
Solyc06g066800.1	31.846	22.173	-0.553027	0.0232329	XP_004241723.1|1.0e-146|protein CDI [Solanum lycopersicum]
Solyc03g082540.2	14.213	9.886	-0.553466	0.00247547	XP_015070903.1|2.7e-135|uncharacterized protein LOC107015218 [Solanum pennellii]
Solyc01g066640.2	15.78	10.973	-0.553579	0.00181601	XP_004229252.1|6.3e-223|uncharacterized protein DDB_G0271670 [Solanum lycopersicum]
Solyc03g033460.2	24.863	16.613	-0.554728	4.78575e-06	PHT49944.1|0.0e+00|Oligopeptide transporter 7 [Capsicum baccatum]
Solyc11g071690.1	37.016	25.776	-0.555339	2.47627e-05	XP_010313476.1|2.9e-302|protein AIR2 isoform X2 [Solanum lycopersicum]
Solyc02g085180.2	29.743	20.723	-0.556917	7.63504e-05	NP_001234536.2|9.0e-190|alpha/beta fold family protein [Solanum lycopersicum]
Solyc11g072970.1	17.91	12.436	-0.557077	0.00424811	XP_004251300.1|9.5e-182|nudix hydrolase 9 isoform X1 [Solanum lycopersicum]
Solyc03g098210.2	21.046	14.48	-0.557318	1.51718e-06	NP_001316156.1|0.0e+00|cyclic nucleotide gated channel 15 [Solanum lycopersicum]
Solyc06g075030.1	14.146	9.796	-0.557439	0.00552764	XP_004241281.1|2.2e-253|lysM domain receptor-like kinase 3 [Solanum lycopersicum]
Solyc07g006400.1	44.6	31.233	-0.557727	5.59684e-06	XP_015162523.1|1.6e-87|PREDICTED: RING-H2 finger protein ATL56-like [Solanum tuberosum]
Solyc08g007990.2	115.3	80.216	-0.558466	2.78575e-10	XP_004244609.1|0.0e+00|uncharacterized protein LOC101252008 [Solanum lycopersicum]
Solyc02g069470.2	37.836	26.293	-0.559306	5.40326e-06	XP_004233196.1|0.0e+00|E3 ubiquitin-protein ligase WAV3-like [Solanum lycopersicum]
Solyc03g117690.2	6.546	4.49	-0.55934	0.0326958	XP_004235884.1|2.3e-276|aspartyl protease family protein At5g10770 [Solanum lycopersicum]
Solyc11g011440.1	60.12	41.836	-0.559446	3.3025e-06	XP_004250199.1|7.5e-254|aspartic proteinase PCS1 [Solanum lycopersicum]
Solyc10g086490.1	22.93	15.91	-0.560167	3.11763e-05	XP_004249837.1|0.0e+00|probable protein phosphatase 2C 4 [Solanum lycopersicum]
Solyc08g081480.2	57.536	39.98	-0.56038	8.77097e-07	PSS11376.1|7.7e-227|Polygalacturonase [Actinidia chinensis var. chinensis]
Solyc05g006990.2	47.21	32.83	-0.560809	6.72471e-07	XP_004238765.1|0.0e+00|protein NRT1/ PTR FAMILY 4.6-like [Solanum lycopersicum]
Solyc05g045650.2	5.136	3.536	-0.561163	0.00324216	XP_016570218.1|0.0e+00|PREDICTED: glutamate receptor 3.4-like [Capsicum annuum]
Solyc01g111080.2	13.923	9.613	-0.562036	0.000130718	XP_025884613.1|8.7e-135|COBRA-like protein 1 [Solanum lycopersicum]
Solyc05g012800.1	3.55	2.87	-0.562321	0.0106776	XP_004239091.1|2.2e-281|uncharacterized protein LOC101254692 [Solanum lycopersicum]
Solyc01g097270.2	212.223	147.37	-0.562351	5.04522e-05	NP_001315589.1|3.2e-127|wound-induced protein WIN1-like precursor [Solanum lycopersicum]
Solyc05g010810.1	162.823	112.783	-0.563525	7.32165e-05	XP_004239016.1|0.0e+00|phosphatidylinositol 4-kinase gamma 7-like [Solanum lycopersicum]
Solyc03g118420.2	14.95	10.333	-0.563528	4.68388e-06	XP_004235756.1|0.0e+00|NF-X1-type zinc finger protein NFXL1 [Solanum lycopersicum]
Solyc03g121660.2	19.126	13.3	-0.564065	0.00012417	XP_004235590.1|0.0e+00|protein indeterminate-domain 7 isoform X1 [Solanum lycopersicum]
Solyc12g008530.1	70.153	48.66	-0.564836	3.01549e-06	XP_004251642.1|3.2e-224|probable pectinesterase 53 [Solanum lycopersicum]
Solyc07g056440.2	27.316	18.886	-0.565367	0.000350906	XP_004243195.1|1.7e-126|probable glutathione S-transferase [Solanum lycopersicum]
Solyc03g093280.1	21.146	14.626	-0.565697	0.00145528	XP_004235169.1|2.2e-186|NADPH-dependent aldo-keto reductase, chloroplastic-like [Solanum lycopersicum]
Solyc06g074670.2	56.61	39.133	-0.566306	1.24997e-05	XP_004241299.1|4.4e-225|UDP-D-apiose/UDP-D-xylose synthase 2 [Solanum lycopersicum]
Solyc03g113570.1	190.493	132.84	-0.566523	3.43956e-06	XP_004236166.1|3.9e-121|germin-like protein subfamily T member 2 [Solanum lycopersicum]
Solyc05g008440.1	99.02	68.406	-0.56724	0.0005808	XP_004238869.1|1.6e-195|histidine-rich glycoprotein [Solanum lycopersicum]
Solyc08g062960.2	10.783	7.25	-0.567354	0.000527208	XP_010325030.1|1.0e-199|heat shock factor protein HSF30 isoform X1 [Solanum lycopersicum]
Solyc10g086320.1	11.253	7.346	-0.568344	0.000321742	XP_015165090.1|0.0e+00|PREDICTED: phosphatidylinositol 4-phosphate 5-kinase 9-like isoform X2 [Solanum tuberosum]
Solyc09g074380.2	31.023	21.413	-0.568483	4.61308e-07	XP_004247472.1|0.0e+00|uncharacterized protein LOC101262857 [Solanum lycopersicum]
Solyc11g069030.1	56.36	38.983	-0.568881	4.52094e-06	NP_001234643.1|1.1e-190|blind [Solanum lycopersicum]
Solyc01g080480.2	10.156	6.94	-0.569163	0.00509209	XP_004229477.1|1.9e-289|uncharacterized protein LOC101267932 [Solanum lycopersicum]
Solyc02g072080.1	22.146	15.25	-0.56923	4.55519e-06	XP_004233034.1|0.0e+00|U-box domain-containing protein 17 [Solanum lycopersicum]
Solyc07g006890.1	29.47	20.223	-0.569945	0.000736619	XP_004242690.1|1.4e-291|cytochrome P450 94A1-like [Solanum lycopersicum]
Solyc06g050630.2	19.64	13.513	-0.570311	0.000694966	XP_004240892.1|1.4e-153|arogenate dehydrogenase 1, chloroplastic [Solanum lycopersicum]
Solyc04g055100.1	15.92	10.933	-0.570422	0.00752431	XP_004237398.1|8.7e-183|uncharacterized protein LOC101261319 [Solanum lycopersicum]
Solyc05g041870.1	135.12	93.94	-0.571263	0.000240234	XP_010321567.1|5.3e-103|cytochrome b561 and DOMON domain-containing protein At5g47530-like [Solanum lycopersicum]
Solyc07g053540.1	573.333	398.36	-0.571552	4.08614e-10	XP_004243392.1|6.6e-138|fasciclin-like arabinogalactan protein 9 [Solanum lycopersicum]
Solyc02g065680.2	64.333	44.966	-0.571713	1.66735e-07	XP_009759063.1|3.4e-230|PREDICTED: probable sodium-coupled neutral amino acid transporter 6 [Nicotiana sylvestris]
Solyc08g005050.2	11.93	8.07	-0.572344	0.0369865	NP_001288107.1|5.1e-125|transcription factor MYC1 [Solanum lycopersicum]
Solyc01g010030.2	12.276	8.583	-0.572448	9.92356e-06	XP_004228851.1|0.0e+00|proline-rich receptor-like protein kinase PERK9 [Solanum lycopersicum]
Solyc06g072460.1	27.163	18.67	-0.57374	0.000102399	XP_004241463.2|2.4e-224|uncharacterized protein LOC101268692 [Solanum lycopersicum]
Solyc06g048410.2	159.653	110.376	-0.573746	2.92662e-11	NP_001233789.2|1.7e-144|iron superoxide dismutase isoform 2 [Solanum lycopersicum]
Solyc04g049920.2	173.47	119.936	-0.57475	1.7312e-07	XP_004237522.1|3.7e-143|probable RNA-binding protein ARP1 isoform X2 [Solanum lycopersicum]
Solyc04g005270.1	42.296	29.283	-0.575591	2.76333e-08	XP_004237064.1|0.0e+00|phosphatidylinositol 4-kinase gamma 5-like isoform X1 [Solanum lycopersicum]
Solyc12g094550.1	11.64	7.95	-0.575625	0.00254088	XP_004253126.1|3.7e-264|uncharacterized protein LOC101250784 [Solanum lycopersicum]
Solyc01g100210.2	91.073	62.703	-0.576002	3.72428e-09	XP_004230281.1|3.5e-212|probable galacturonosyltransferase-like 7 [Solanum lycopersicum]
Solyc04g076870.2	24.15	16.563	-0.576694	2.16361e-06	XP_004238036.1|1.3e-303|glutamyl-tRNA reductase 1, chloroplastic [Solanum lycopersicum]
Solyc05g016310.1	7.116	4.833	-0.577149	0.0153258	XP_004239252.1|0.0e+00|aspartyl protease family protein 2 [Solanum lycopersicum]
Solyc03g123860.2	2.373	1.596	-0.577486	0.041167	XP_004235511.1|0.0e+00|receptor-like protein kinase [Solanum lycopersicum]
Solyc02g086270.2	24.986	17.153	-0.578336	5.43135e-09	XP_010316315.1|0.0e+00|LEAF RUST 10 DISEASE-RESISTANCE LOCUS RECEPTOR-LIKE PROTEIN KINASE-like 1.4 isoform X1 [Solanum lycopersicum]
Solyc03g044910.1	66.436	45.773	-0.578349	5.89678e-07	XP_004234683.1|3.5e-167|elongation of fatty acids protein 3-like [Solanum lycopersicum]
Solyc06g060120.2	45.723	31.293	-0.578378	3.03007e-05	XP_004242041.1|0.0e+00|SWI/SNF complex subunit SWI3C [Solanum lycopersicum]
Solyc06g005110.2	23.163	15.833	-0.578418	0.0107583	XP_022938920.1|2.0e-47|40S ribosomal protein S23 isoform X1 [Cucurbita moschata]
Solyc02g084650.2	11.413	7.763	-0.578534	0.0113476	XP_004232452.1|4.7e-84|uncharacterized protein LOC101247385 [Solanum lycopersicum]
Solyc02g090690.1	5.513	3.61	-0.578564	0.00669229	XP_004233635.1|5.9e-279|uncharacterized membrane protein At3g27390 [Solanum lycopersicum]
Solyc03g033710.2	36.506	25.016	-0.579106	0.000138289	XP_004234547.1|1.8e-190|peroxidase 72 [Solanum lycopersicum]
Solyc11g068550.1	24.186	16.566	-0.580154	0.0104862	XP_004251067.1|1.5e-102|uncharacterized protein LOC101262988 [Solanum lycopersicum]
Solyc11g005670.1	121.843	81.226	-0.58149	2.15387e-06	NP_001332808.1|1.2e-298|ubiquitin [Solanum lycopersicum]
Solyc05g011980.2	87.803	60.09	-0.582019	5.82501e-07	XP_004239026.1|3.8e-88|uncharacterized protein LOC101261117 [Solanum lycopersicum]
Solyc07g048090.1	536.39	368.36	-0.582858	3.98574e-09	XP_015082872.1|1.8e-129|fasciclin-like arabinogalactan protein 7 [Solanum pennellii]
Solyc04g077810.1	24.7	16.856	-0.582948	0.00752889	XP_019069220.1|1.0e-138|uncharacterized protein LOC109120151 [Solanum lycopersicum]
Solyc08g008370.2	50.083	35.656	-0.583251	0.000104014	XP_004244639.1|8.1e-194|B2 protein [Solanum lycopersicum]
Solyc02g063010.2	72.11	49.283	-0.583831	2.58723e-06	XP_004233505.1|6.0e-186|BES1/BZR1 homolog protein 2 [Solanum lycopersicum]
Solyc02g086370.2	10.646	7.216	-0.584153	0.00221096	XP_004232329.1|4.9e-230|lipid phosphate phosphatase 2 isoform X2 [Solanum lycopersicum]
Solyc05g007460.2	35.963	24.536	-0.585121	0.000186228	XP_004238795.1|3.2e-158|sphinganine C4-monooxygenase 1 [Solanum lycopersicum]
Solyc01g091950.2	72.516	49.473	-0.585553	4.48435e-06	XP_004229866.1|0.0e+00|lysophospholipid acyltransferase LPEAT2 [Solanum lycopersicum]
Solyc07g008250.2	213.093	145.41	-0.585906	2.03143e-07	XP_004242782.1|0.0e+00|EIN3-binding F-box protein 1 [Solanum lycopersicum]
Solyc10g051020.1	7.426	5.003	-0.586738	0.0272591	XP_004248734.1|5.9e-306|cytochrome P450 CYP72A219 [Solanum lycopersicum]
Solyc07g063270.2	83.566	57.056	-0.587138	1.25514e-11	XP_004244213.1|6.3e-302|nuclear/nucleolar GTPase 2 [Solanum lycopersicum]
Solyc02g070580.1	33.23	22.946	-0.587364	1.31511e-06	NP_001234514.1|4.9e-297|cytochrome P450 710A11 [Solanum lycopersicum]
Solyc02g067860.2	27.926	19.006	-0.587728	0.000431369	XP_006357162.1|9.4e-169|PREDICTED: putative glucose-6-phosphate 1-epimerase [Solanum tuberosum]
Solyc01g100140.2	69.39	47.296	-0.5883	2.58163e-05	XP_004230276.1|7.0e-124|protein DEHYDRATION-INDUCED 19 homolog 3 [Solanum lycopersicum]
Solyc04g082060.2	72.18	49.15	-0.588752	1.13528e-05	XP_004238401.1|1.8e-241|F-box protein SKIP23 [Solanum lycopersicum]
Solyc11g072560.1	11.046	7.46	-0.58892	0.00380191	XP_015056739.1|2.5e-280|protein NRT1/ PTR FAMILY 2.7-like [Solanum pennellii]
Solyc07g041940.2	40.313	27.453	-0.589018	1.91844e-08	XP_004243705.1|4.4e-254|serine/threonine-protein kinase RIPK [Solanum lycopersicum]
Solyc04g074470.1	80.666	55.043	-0.58957	6.62408e-05	XP_004237934.1|2.8e-178|protein EXORDIUM-like 2 [Solanum lycopersicum]
Solyc12g005900.1	8.65	6.03	-0.589889	0.000782039	XP_004252036.1|0.0e+00|recQ-mediated genome instability protein 1-like isoform X1 [Solanum lycopersicum]
Solyc02g087280.2	52.823	36.263	-0.590146	6.16617e-10	XP_010316272.1|6.5e-310|protein NRT1/ PTR FAMILY 5.8 [Solanum lycopersicum]
Solyc02g083850.2	24.713	16.763	-0.590349	7.89981e-05	XP_004232492.1|0.0e+00|calcium-dependent protein kinase 18-like [Solanum lycopersicum]
Solyc11g007890.1	47.046	32.076	-0.590505	9.87764e-08	XP_004250021.1|1.1e-216|protein DMR6-LIKE OXYGENASE 2-like [Solanum lycopersicum]
Solyc01g087590.2	4.136	2.763	-0.590769	0.0426725	XP_004229651.1|5.4e-290|polyamine oxidase 1 [Solanum lycopersicum]
Solyc01g112220.2	29.216	19.863	-0.590822	3.80161e-06	XP_004231098.1|8.3e-237|probable serine/threonine-protein kinase PIX13 [Solanum lycopersicum]
Solyc02g080210.2	756.156	519.106	-0.59105	3.01549e-10	XP_004232737.1|0.0e+00|pectinesterase [Solanum lycopersicum]
Solyc10g076300.1	15.18	10.246	-0.591439	0.0331728	XP_004249059.1|5.9e-105|CASP-like protein 4B1 [Solanum lycopersicum]
Solyc08g061590.2	45.806	31.16	-0.592447	1.19968e-06	XP_010325002.1|1.5e-133|pentatricopeptide repeat-containing protein At1g62350 [Solanum lycopersicum]
Solyc07g009020.1	683.39	480.93	-0.593788	8.33972e-06	XP_015170881.1|2.0e-52|PREDICTED: defensin D1-like [Solanum tuberosum]
Solyc09g007860.2	3.836	2.553	-0.594132	0.0412961	XP_004246654.1|0.0e+00|synaptotagmin-3 isoform X2 [Solanum lycopersicum]
Solyc11g068450.1	23.753	16.053	-0.595521	0.0491834	XP_004251058.1|5.1e-68|biogenesis of lysosome-related organelles complex 1 subunit 1 [Solanum lycopersicum]
Solyc02g077420.2	27.753	18.753	-0.59595	0.000181101	XP_004232943.1|1.2e-233|phospholipase A1-II 1 [Solanum lycopersicum]
Solyc04g010270.1	87.006	58.966	-0.596605	5.02438e-06	XP_004236764.1|7.5e-232|dirigent protein 24 [Solanum lycopersicum]
Solyc08g075420.2	52.626	35.416	-0.59753	0.000678561	XP_004246011.1|0.0e+00|uncharacterized zinc finger CCHC domain-containing protein At4g19190 [Solanum lycopersicum]
Solyc07g009060.2	1408.59	967.313	-0.597635	4.09359e-06	XP_004242838.1|4.6e-52|defensin D1-like [Solanum lycopersicum]
Solyc05g054790.1	77.373	53.09	-0.597882	0.00794243	XP_004239767.1|1.9e-52|dirigent protein 24 [Solanum lycopersicum]
Solyc01g096740.2	37.14	25.133	-0.598148	5.60934e-08	XP_004230052.1|3.1e-279|protein ZINC INDUCED FACILITATOR-LIKE 1 [Solanum lycopersicum]
Solyc08g076320.2	61.61	41.663	-0.598208	4.27081e-13	XP_004245916.1|0.0e+00|cellulose synthase-like protein D3 [Solanum lycopersicum]
Solyc07g052510.2	1678.74	1139.65	-0.598263	1.45063e-14	XP_015080677.1|5.9e-185|peroxidase 3-like [Solanum pennellii]
Solyc02g084390.2	37.63	25.443	-0.598269	4.53799e-11	XP_004232466.1|0.0e+00|kinesin-like protein KIN-7F [Solanum lycopersicum]
Solyc10g074890.1	34.613	23.36	-0.598965	2.07044e-07	XP_004249029.1|0.0e+00|probable LRR receptor-like serine/threonine-protein kinase At1g06840 [Solanum lycopersicum]
Solyc07g009100.2	1449.2	989.103	-0.598998	0.00012417	XP_004242842.1|9.1e-52|defensin D1-like [Solanum lycopersicum]
Solyc08g078870.1	737.35	505.02	-0.600979	7.13355e-06	XP_004245752.1|6.8e-82|14 kDa proline-rich protein DC2.15-like [Solanum lycopersicum]
Solyc02g081150.1	13.243	8.856	-0.601421	0.00970303	XP_004232680.1|4.3e-199|uncharacterized protein LOC101244145 [Solanum lycopersicum]
Solyc12g089040.1	69.993	47.366	-0.601946	3.14853e-08	NP_001234745.2|3.2e-196|mature anther-specific protein LAT61 [Solanum lycopersicum]
Solyc02g083170.2	7.283	4.863	-0.603339	0.00416038	XP_004232539.1|7.0e-293|F-box protein SKIP23 [Solanum lycopersicum]
Solyc09g018280.1	28.206	18.836	-0.604201	0.00317779	XP_004246268.1|6.7e-258|CBL-interacting serine/threonine-protein kinase 14 [Solanum lycopersicum]
Solyc09g011560.2	23.913	16.013	-0.605401	0.00087492	XP_004246384.1|1.3e-123|probable glutathione S-transferase [Solanum lycopersicum]
Solyc06g009670.2	6.063	4.033	-0.605756	0.00919126	XP_004240574.1|0.0e+00|uncharacterized protein LOC101267897 [Solanum lycopersicum]
Solyc02g080880.2	48.286	32.506	-0.607097	2.50122e-09	XP_004232695.1|4.9e-300|aspartic proteinase [Solanum lycopersicum]
Solyc03g097500.2	16.763	11.21	-0.607176	0.00230882	XP_015068398.1|9.0e-246|omega-hydroxypalmitate O-feruloyl transferase-like [Solanum pennellii]
Solyc08g078040.2	6.406	4.246	-0.608287	0.0200752	XP_015085148.1|2.4e-202|monooxygenase 2-like [Solanum pennellii]
Solyc09g011590.2	69.86	47.023	-0.608422	6.71162e-07	XP_004246381.1|1.6e-122|probable glutathione S-transferase [Solanum lycopersicum]
Solyc04g076220.2	25.283	16.846	-0.608966	0.00386962	XP_004237987.1|2.2e-200|AT-hook motif nuclear-localized protein 17 [Solanum lycopersicum]
Solyc01g099870.1	14.793	9.946	-0.611821	0.00696369	XP_025888560.1|2.7e-99|bidirectional sugar transporter SWEET16-like [Solanum lycopersicum]
Solyc02g089160.2	12.91	8.613	-0.612251	0.000223029	XP_015063831.1|6.2e-269|cytochrome P450 85A1 [Solanum pennellii]
Solyc08g080540.2	6.403	4.21	-0.612291	0.0314312	XP_004245637.1|2.9e-184|heat stress transcription factor B-2b [Solanum lycopersicum]
Solyc06g063210.2	3.54	2.34	-0.612475	0.00690757	XP_010322804.1|0.0e+00|glutamate receptor 2.8 [Solanum lycopersicum]
Solyc01g095720.2	7.92	5.27	-0.613217	0.000414799	XP_004231212.1|0.0e+00|phospholipase A1 PLIP1, chloroplastic [Solanum lycopersicum]
Solyc07g009070.2	851.403	577.143	-0.613382	3.9713e-07	XP_015081702.1|2.7e-50|defensin-like protein 19 [Solanum pennellii]
Solyc09g056450.2	19.12	12.72	-0.613557	0.000217099	XP_004247038.1|1.4e-250|U-box domain-containing protein 9 [Solanum lycopersicum]
Solyc10g083300.1	68.836	46.096	-0.613613	7.06546e-07	NP_001311325.1|0.0e+00|invertase 8 [Solanum lycopersicum]
Solyc06g073160.2	6.153	4.016	-0.613931	0.000740742	XP_004241421.1|0.0e+00|uncharacterized protein LOC101255704 [Solanum lycopersicum]
Solyc12g014140.1	11.466	7.6	-0.61465	0.00206401	NP_001234367.2|1.7e-228|TCP transcription factor 3 [Solanum lycopersicum]
Solyc08g061230.2	7.696	5.053	-0.614887	0.0200752	XP_004245033.1|3.4e-47|epoxide hydrolase 4 isoform X1 [Solanum lycopersicum]
Solyc02g072160.2	3.516	2.283	-0.615133	0.0309171	XP_010316841.1|0.0e+00|uncharacterized protein LOC101268540 isoform X3 [Solanum lycopersicum]
Solyc03g115450.1	4.766	3.116	-0.615469	0.0466323	XP_004236489.1|4.1e-263|zinc finger protein ZAT9-like [Solanum lycopersicum]
Solyc03g123410.1	16.093	10.663	-0.616382	0.0225949	XP_004235542.1|1.7e-110|auxin-binding protein ABP19a [Solanum lycopersicum]
Solyc10g011810.2	49.106	32.836	-0.617086	9.77857e-09	PHU04956.1|1.5e-196|Delta(8)-fatty-acid desaturase [Capsicum chinense]
Solyc08g066650.2	7.626	5.04	-0.617762	0.00522302	NP_001266276.2|0.0e+00|carotenoid cleavage dioxygenase 8, chloroplastic-like [Solanum lycopersicum]
Solyc01g090460.2	8.203	5.37	-0.617852	0.0390003	NP_001234233.1|4.8e-161|HD-ZIP protein [Solanum lycopersicum]
Solyc02g038740.2	5.656	3.693	-0.618078	0.030518	NP_001296119.1|0.0e+00|3-hydroxy-3-methylglutaryl-coenzyme A reductase 2 [Solanum lycopersicum]
Solyc02g092150.2	7.483	4.97	-0.618799	0.00713858	XP_004231941.1|1.3e-280|ACT domain-containing protein ACR1 isoform X2 [Solanum lycopersicum]
Solyc12g015770.1	14.613	9.556	-0.620041	1.85841e-06	XP_010313949.1|0.0e+00|cellulose synthase-like protein E6 isoform X1 [Solanum lycopersicum]
Solyc12g097090.1	15.896	10.526	-0.62009	0.00771457	XP_004253009.1|5.5e-140|dirigent protein 18-like [Solanum lycopersicum]
Solyc01g011430.2	11.203	7.416	-0.620196	0.000493345	XP_004228362.1|7.6e-294|O-acyltransferase WSD1-like [Solanum lycopersicum]
Solyc09g005210.2	78.08	52.133	-0.62069	2.90758e-05	XP_004246773.3|1.6e-159|protein LURP-one-related 5-like [Solanum lycopersicum]
Solyc08g005560.2	27.903	17.966	-0.622114	0.000154197	NP_001308580.1|8.9e-257|transglutaminase-like and tetratricopeptide repeat-containing protein isoform 2 [Solanum lycopersicum]
Solyc05g007980.2	17.383	11.513	-0.622337	5.23968e-05	XP_016548287.1|0.0e+00|PREDICTED: probable sulfate transporter 3.3 [Capsicum annuum]
Solyc01g106640.2	14.793	9.703	-0.62259	0.0406446	XP_004230669.1|6.0e-97|pathogenesis-related leaf protein 6 [Solanum lycopersicum]
Solyc02g090130.2	11.82	10.04	-0.622743	3.53017e-07	PHU27401.1|0.0e+00|hypothetical protein BC332_05733 [Capsicum chinense]
Solyc02g078530.2	23.073	15.316	-0.622748	5.36823e-06	XP_004232848.1|7.6e-210|cold-responsive protein kinase 1-like [Solanum lycopersicum]
BGI_novel_G000370	17.996	11.923	-0.6231	8.81698e-05
Solyc11g069530.1	47.186	31.43	-0.623228	1.12723e-09	XP_004251144.1|0.0e+00|protein ENHANCED DISEASE RESISTANCE 2-like [Solanum lycopersicum]
Solyc05g005920.2	4.016	2.62	-0.624044	0.0275401	XP_004238696.1|0.0e+00|protein NRT1/ PTR FAMILY 1.2 [Solanum lycopersicum]
Solyc01g104110.2	144.08	95.833	-0.624963	6.76516e-07	XP_019067358.1|2.7e-201|12S seed storage protein CRD [Solanum lycopersicum]
Solyc02g069740.2	3.166	1.993	-0.625096	0.0091053	XP_004233887.1|0.0e+00|lysine-specific demethylase JMJ18 [Solanum lycopersicum]
Solyc03g026340.2	41.336	27.443	-0.625418	6.55449e-11	XP_025885587.1|4.8e-286|calcium-dependent protein kinase 26 [Solanum lycopersicum]
Solyc03g115860.2	131.236	87.306	-0.627223	1.8258e-06	XP_004236029.1|5.1e-110|uncharacterized endoplasmic reticulum membrane protein C16E8.02 [Solanum lycopersicum]
Solyc07g008240.2	1541.18	1028.16	-0.627271	1.93757e-08	NP_001234498.1|6.9e-80|non-symbiotic hemoglobin class 1 [Solanum lycopersicum]
Solyc08g081540.2	29.856	19.763	-0.62737	3.08877e-07	AAC83147.1|1.1e-260|1-aminocyclopropane-1-carboxylate synthase [Nicotiana glutinosa]
Solyc04g076700.2	16.39	10.813	-0.627551	0.000192666	XP_004238023.1|1.6e-67|MADS-box transcription factor 23 isoform X2 [Solanum lycopersicum]
Solyc08g080670.1	633.136	422.13	-0.628092	3.79067e-08	NP_001234351.2|2.4e-159|PR5-like protein precursor [Solanum lycopersicum]
Solyc05g047590.2	14.873	9.796	-0.628292	0.00012801	XP_004240117.1|0.0e+00|probable pectinesterase/pectinesterase inhibitor 12 [Solanum lycopersicum]
Solyc11g012420.1	56.103	37.136	-0.628522	8.35441e-06	XP_004250273.1|4.6e-237|cytochrome b561 and DOMON domain-containing protein At5g47530 [Solanum lycopersicum]
BGI_novel_G000278	32.593	21.56	-0.62866	4.38813e-08
Solyc06g060710.2	27.163	18.32	-0.629927	1.1205e-06	XP_010322898.1|6.5e-230|putative glucuronosyltransferase PGSIP8 isoform X1 [Solanum lycopersicum]
Solyc03g005200.2	35	23.183	-0.632021	0.000109858	XP_004234014.1|2.3e-92|non-specific lipid-transfer protein-like protein At2g13820 [Solanum lycopersicum]
Solyc04g054340.1	356.273	241.7	-0.632267	0.0075807	XP_019228391.1|1.3e-24|PREDICTED: uncharacterized protein LOC109209553 [Nicotiana attenuata]
Solyc09g075460.2	50.41	33.276	-0.633414	2.85487e-08	XP_004247394.1|2.5e-279|probable polygalacturonase [Solanum lycopersicum]
Solyc11g011980.1	3.596	2.163	-0.634005	0.00944496	XP_004250243.1|0.0e+00|E3 ubiquitin-protein ligase COP1-like isoform X1 [Solanum lycopersicum]
Solyc02g083540.2	41.063	27.063	-0.634041	4.23089e-09	XP_004232512.1|5.8e-242|protein MID1-COMPLEMENTING ACTIVITY 1 [Solanum lycopersicum]
Solyc01g059990.2	228.7	150.57	-0.634237	3.94757e-07	XP_019068294.1|1.1e-160|serine/threonine-protein phosphatase 7 long form homolog [Solanum lycopersicum]
Solyc10g084990.1	10.793	7.023	-0.634896	0.0164518	XP_004249552.1|7.2e-182|phosphatidylinositol:ceramide inositolphosphotransferase 1-like isoform X1 [Solanum lycopersicum]
Solyc04g081140.1	4.933	3.196	-0.635167	0.0237118	XP_015073092.1|0.0e+00|aldehyde oxidase GLOX1-like [Solanum pennellii]
Solyc06g072430.1	5.573	3.6	-0.635588	0.044037	XP_015078554.1|1.1e-197|uncharacterized protein LOC107022466 [Solanum pennellii]
Solyc07g009230.2	2138.85	1424.85	-0.637169	1.50007e-10	XP_009598086.1|2.0e-32|PREDICTED: defensin Lc-def-like [Nicotiana tomentosiformis]
Solyc02g093430.2	77.013	50.776	-0.637765	1.09895e-09	XP_019250728.1|2.5e-202|PREDICTED: uncharacterized protein LOC109229656 isoform X1 [Nicotiana attenuata]
Solyc02g090410.2	28.763	18.97	-0.638065	5.05318e-06	XP_004232054.1|6.4e-179|LOB domain-containing protein 36-like [Solanum lycopersicum]
Solyc05g008810.2	120.38	78.853	-0.638513	1.177e-08	XP_004238889.1|2.3e-194|lipid phosphate phosphatase 2-like [Solanum lycopersicum]
Solyc12g014020.1	21.316	13.97	-0.638541	0.00451378	XP_019067188.1|9.8e-75|SOSS complex subunit B homolog [Solanum lycopersicum]
Solyc05g010330.2	8.316	5.436	-0.639056	0.0397417	XP_004238993.1|4.1e-199|peroxidase 11 [Solanum lycopersicum]
Solyc12g057160.1	57.053	37.523	-0.639681	0.00998047	XP_004252525.1|4.0e-65|classical arabinogalactan protein 5 [Solanum lycopersicum]
Solyc09g011510.2	10.55	6.836	-0.640607	0.0209033	XP_010325822.2|4.9e-113|LOW QUALITY PROTEIN: probable glutathione S-transferase [Solanum lycopersicum]
Solyc03g044220.1	33.34	21.903	-0.640776	1.92328e-09	XP_004234661.1|0.0e+00|F-box protein SKIP2-like [Solanum lycopersicum]
Solyc09g091910.1	20.163	13.286	-0.640972	1.09776e-05	XP_004247857.1|0.0e+00|purple acid phosphatase 15 isoform X1 [Solanum lycopersicum]
Solyc02g067980.2	22.92	15.026	-0.641099	2.53891e-07	XP_010317069.1|1.9e-305|serine/threonine protein phosphatase 2A 57 kDa regulatory subunit B' theta isoform [Solanum lycopersicum]
Solyc02g087740.2	126.733	83.426	-0.641505	2.11727e-12	XP_004232237.1|2.0e-159|plant cysteine oxidase 2 [Solanum lycopersicum]
Solyc01g103250.2	10.883	7.11	-0.642601	0.000147929	XP_004230434.1|0.0e+00|uncharacterized protein At5g08430 isoform X2 [Solanum lycopersicum]
Solyc09g011630.2	133.91	88.136	-0.642946	1.69416e-10	NP_001234086.1|5.1e-124|uncharacterized LOC543814 [Solanum lycopersicum]
Solyc01g100200.2	33.823	22.076	-0.645738	1.15716e-05	NP_001234310.1|0.0e+00|GRAS4 isoform 1 [Solanum lycopersicum]
Solyc08g076730.2	100.676	65.88	-0.645805	3.5031e-05	XP_004245908.1|5.9e-171|uncharacterized protein LOC101247449 [Solanum lycopersicum]
Solyc05g054170.2	37.196	24.356	-0.646434	1.4303e-10	XP_004239819.1|2.4e-181|scarecrow-like protein 13 [Solanum lycopersicum]
Solyc03g121620.1	66.236	43.01	-0.64668	0.00160978	XP_004235596.1|4.8e-150|NDR1/HIN1-like protein 13 [Solanum lycopersicum]
Solyc04g009990.2	28.25	18.44	-0.647005	1.34052e-11	XP_004236784.1|0.0e+00|putative lysine-specific demethylase JMJ16 [Solanum lycopersicum]
Solyc08g060920.2	12.626	8.176	-0.648551	0.00324592	XP_015083677.1|5.8e-152|SPX domain-containing protein 1-like [Solanum pennellii]
Solyc10g085860.1	6.203	3.99	-0.649781	0.00866522	XP_004249831.1|5.7e-290|UDP-glycosyltransferase 73D1 [Solanum lycopersicum]
Solyc03g113580.1	371.936	244.9	-0.650406	5.1547e-15	XP_004236167.1|6.5e-121|germin-like protein subfamily T member 2 [Solanum lycopersicum]
Solyc11g071990.1	31.326	20.423	-0.651028	4.45168e-07	XP_004251229.1|3.0e-211|apoptosis-inducing factor homolog B [Solanum lycopersicum]
Solyc08g078920.1	119.913	79.323	-0.651204	2.75317e-06	XP_004245749.1|2.2e-77|14 kDa proline-rich protein DC2.15-like [Solanum lycopersicum]
Solyc01g109140.2	35.1	22.843	-0.651962	5.60934e-08	NP_001234527.1|4.6e-280|9-divinyl ether synthase [Solanum lycopersicum]
Solyc04g007150.2	10.32	6.673	-0.652251	0.000101459	XP_004236960.1|0.0e+00|alpha-xylosidase 1 [Solanum lycopersicum]
Solyc07g005090.2	159.013	103.893	-0.653366	2.05773e-15	XP_004242561.1|1.3e-217|class V chitinase [Solanum lycopersicum]
Solyc07g007350.1	13.543	8.686	-0.653558	0.020383	XP_004243024.1|1.6e-142|uncharacterized protein LOC101257978 [Solanum lycopersicum]
Solyc02g092090.1	61.343	39.996	-0.65382	7.45135e-05	XP_010316032.1|1.7e-121|bZIP transcription factor 2 [Solanum lycopersicum]
Solyc05g052550.1	60.436	39.003	-0.654594	0.0287494	XP_004239943.1|3.6e-65|zinc finger CCCH domain-containing protein 29 [Solanum lycopersicum]
Solyc06g074420.1	8.816	5.663	-0.654898	0.00494206	XP_025887522.1|1.2e-281|cytochrome P450 94C1 [Solanum lycopersicum]
Solyc08g007460.2	110.156	71.933	-0.655291	4.60332e-09	XP_004244575.1|6.1e-83|protein YLS3 [Solanum lycopersicum]
Solyc07g053030.2	24.316	15.796	-0.655655	5.75887e-06	RID78916.1|7.3e-159|hypothetical protein BRARA_A01696 [Brassica rapa]
Solyc07g005210.2	29.24	7.353	-0.656666	3.21861e-07	NP_001234832.1|3.7e-107|temperature-induced lipocalin' [Solanum lycopersicum]
Solyc03g078610.2	27.81	18.046	-0.656688	6.40003e-06	XP_004235061.1|4.7e-171|uncharacterized protein LOC101261895 [Solanum lycopersicum]
Solyc05g025510.2	63.216	41.053	-0.657727	1.58389e-10	XP_006354306.1|0.0e+00|PREDICTED: WD repeat-containing protein 26-like isoform X1 [Solanum tuberosum]
Solyc04g011440.2	11.21	7.236	-0.658104	8.04904e-05	NP_001266213.1|0.0e+00|heat shock protein 70-3 [Solanum lycopersicum]
Solyc08g078510.2	64.71	41.973	-0.660328	2.73355e-12	XP_004245778.1|1.3e-164|GEM-like protein 5 [Solanum lycopersicum]
Solyc08g005610.2	169.796	110.023	-0.661027	5.28095e-09	XP_004244436.1|6.0e-272|abscisic acid 8'-hydroxylase 1 [Solanum lycopersicum]
Solyc04g082360.1	49.666	32.25	-0.661284	4.31987e-07	XP_004238423.1|6.0e-153|F-box protein At2g26160 [Solanum lycopersicum]
Solyc10g018330.1	11.626	7.363	-0.661443	0.0437133	XP_015055424.1|3.5e-122|pectinesterase inhibitor 11-like [Solanum pennellii]
Solyc03g121200.2	162.38	108.283	-0.66247	0.000590213	XP_002515929.1|5.3e-07|uncharacterized protein LOC8281613 [Ricinus communis]
Solyc01g108740.2	67.943	43.87	-0.662794	7.76538e-05	XP_004231412.1|3.7e-163|salicylic acid-binding protein 2-like [Solanum lycopersicum]
Solyc06g069040.2	55.05	35.656	-0.663217	8.04265e-08	NP_001234091.1|9.0e-129|putative glutathione S-transferase T4 [Solanum lycopersicum]
Solyc06g067870.2	71.296	45.793	-0.663239	0.000339011	XP_004241716.1|2.4e-182|2-oxoglutarate-dependent dioxygenase AOP2-like [Solanum lycopersicum]
Solyc06g069070.1	60.88	40.66	-0.66365	0.00236335	XP_009792617.1|2.7e-39|PREDICTED: non-specific lipid-transfer protein 2-like [Nicotiana sylvestris]
Solyc11g011590.1	4.083	2.51	-0.664454	0.00349975	XP_010312721.1|4.8e-116|putative GEM-like protein 8 isoform X3 [Solanum lycopersicum]
Solyc03g095300.2	13.14	8.413	-0.664533	0.00370875	XP_004235211.1|2.6e-80|uncharacterized protein LOC101249714 [Solanum lycopersicum]
Solyc10g007890.2	7.42	4.743	-0.664914	0.00110453	XP_004248200.1|9.8e-312|cytochrome P450 CYP72A219-like [Solanum lycopersicum]
Solyc03g032230.1	8.046	5.1	-0.66684	0.0171128	XP_004234592.1|1.1e-188|uncharacterized protein LOC101267386 [Solanum lycopersicum]
Solyc02g069730.2	18.986	12.08	-0.669344	0.0124929	XP_004233179.1|2.1e-106|CASP-like protein 1B2 [Solanum lycopersicum]
Solyc04g040090.2	40.786	26.163	-0.672453	1.59434e-06	XP_004237337.1|3.2e-216|protein STRICTOSIDINE SYNTHASE-LIKE 10-like [Solanum lycopersicum]
Solyc03g078360.1	4.02	2.536	-0.674117	0.00469416	XP_004235072.1|0.0e+00|G-type lectin S-receptor-like serine/threonine-protein kinase LECRK1 [Solanum lycopersicum]
Solyc02g093660.1	39.033	24.906	-0.674344	0.000453705	XP_010315947.1|8.5e-225|uncharacterized protein LOC104645667 [Solanum lycopersicum]
Solyc04g009440.2	6.183	3.89	-0.675051	0.0152373	NP_001234482.1|2.3e-181|NAC domain protein [Solanum lycopersicum]
Solyc03g115870.2	88.75	57.03	-0.675366	5.2376e-10	XP_004236024.1|1.1e-137|thioredoxin-like 1-2, chloroplastic [Solanum lycopersicum]
Solyc08g074970.1	13.553	8.63	-0.676664	8.95527e-05	XP_004246042.1|2.7e-284|uncharacterized protein LOC101261544 [Solanum lycopersicum]
Solyc06g084060.2	18.266	12.406	-0.678254	8.63256e-07	XP_004242349.1|0.0e+00|F-box/LRR-repeat protein 17-like [Solanum lycopersicum]
Solyc05g009210.1	11.176	7.043	-0.678499	0.0133664	XP_004238919.1|1.6e-162|pinin [Solanum lycopersicum]
Solyc02g079190.2	134.38	85.476	-0.680001	7.13278e-11	XP_004232795.1|0.0e+00|protein AUXIN SIGNALING F-BOX 2 [Solanum lycopersicum]
Solyc11g066880.1	39.15	25.196	-0.681027	0.0151382	NP_001266262.1|1.5e-48|putative phytosulfokines 6-like precursor [Solanum lycopersicum]
Solyc10g085240.1	7.63	4.476	-0.68132	0.0253507	XP_015055244.1|1.7e-259|UDP-glycosyltransferase 76E1-like [Solanum pennellii]
Solyc08g074480.1	49.71	31.636	-0.681591	0.0116416	XP_004246067.1|3.4e-72|14 kDa proline-rich protein DC2.15 [Solanum lycopersicum]
Solyc05g052670.1	7.736	4.87	-0.682114	0.00561226	XP_004239936.1|4.2e-271|BAHD acyltransferase DCR [Solanum lycopersicum]
Solyc10g084400.1	25.903	16.4	-0.682452	0.00162575	XP_004249510.1|5.5e-134|glutathione S-transferase L3 isoform X1 [Solanum lycopersicum]
Solyc03g031620.2	21.093	13.296	-0.682675	0.000820609	XP_004234472.1|2.5e-265|5'-adenylylsulfate reductase 3, chloroplastic-like [Solanum lycopersicum]
Solyc01g107540.2	139.063	88.7	-0.683453	2.42288e-05	XP_004230730.1|1.6e-132|uncharacterized protein LOC101249498 [Solanum lycopersicum]
Solyc04g076120.2	8.633	5.526	-0.683858	0.000129097	XP_010320198.2|1.6e-263|serine carboxypeptidase-like 17 [Solanum lycopersicum]
Solyc09g008780.2	3.52	2.193	-0.68439	0.0183268	XP_004246584.1|4.0e-262|sulfite exporter TauE/SafE family protein 4 [Solanum lycopersicum]
Solyc06g053710.2	28.893	18.353	-0.684428	4.44563e-10	NP_001234205.1|0.0e+00|ethylene receptor ETR4 precursor [Solanum lycopersicum]
Solyc10g049970.1	77.12	49.22	-0.684798	4.01221e-07	XP_004248760.1|4.1e-149|cyclase-like protein 1 [Solanum lycopersicum]
Solyc10g084910.1	16.303	10.303	-0.685893	0.000582509	XP_004249544.1|4.7e-217|uncharacterized protein LOC101264877 [Solanum lycopersicum]
Solyc02g087090.2	157.87	100.323	-0.686568	1.22817e-07	NP_001234414.1|0.0e+00|alpha-DOX2 [Solanum lycopersicum]
Solyc02g076830.1	51.64	32.876	-0.686695	4.62608e-08	XP_004233063.1|6.6e-266|epidermis-specific secreted glycoprotein EP1-like [Solanum lycopersicum]
Solyc09g089580.2	13.816	8.716	-0.687117	4.24984e-05	NP_001296142.1|1.6e-214|1-aminocyclopropane-1-carboxylate oxidase homolog isoform 1 [Solanum lycopersicum]
Solyc04g077500.2	38.26	24.156	-0.689819	4.14748e-05	XP_004238074.1|1.3e-160|uncharacterized protein LOC101254084 isoform X1 [Solanum lycopersicum]
Solyc03g118000.1	10.093	6.303	-0.691337	0.00787415	XP_004235863.1|5.6e-168|inositol polyphosphate multikinase beta [Solanum lycopersicum]
Solyc04g077440.2	84.266	53.453	-0.691667	4.23121e-13	NP_001352991.1|6.2e-282|squalene monooxygenase [Solanum lycopersicum]
Solyc05g046020.2	286.733	182.283	-0.691935	5.41817e-14	NP_001307284.1|2.6e-185|peroxidase 3 precursor [Solanum lycopersicum]
Solyc05g009890.1	31.883	20.14	-0.691986	1.54814e-06	XP_004238970.1|3.1e-266|aspartyl protease family protein 2 [Solanum lycopersicum]
Solyc01g058320.2	15.95	10.093	-0.692041	4.62945e-05	XP_004229022.1|9.9e-154|uncharacterized protein LOC101267838 isoform X1 [Solanum lycopersicum]
Solyc09g074290.1	4.926	3.03	-0.692143	0.0423483	XP_004247546.1|1.1e-274|ankyrin repeat, PH and SEC7 domain containing protein secG-like [Solanum lycopersicum]
Solyc03g098320.2	5.213	3.22	-0.692809	0.0212575	XP_004235390.1|2.5e-265|protein REVEILLE 7 [Solanum lycopersicum]
Solyc02g089720.1	63.726	40.37	-0.693911	1.63748e-15	XP_004232103.1|0.0e+00|probable endo-1,3(4)-beta-glucanase ARB_01444 isoform X1 [Solanum lycopersicum]
Solyc02g094330.2	51.706	32.626	-0.694062	2.75511e-05	XP_004231761.1|1.6e-90|pollen allergen Che a 1 [Solanum lycopersicum]
Solyc05g056080.2	8.223	5.15	-0.695812	0.000166827	XP_015076137.1|2.8e-68|uncharacterized protein LOC107020332 [Solanum pennellii]
Solyc08g078900.1	922.496	592.553	-0.696339	2.21083e-09	NP_001233824.1|3.4e-75|arachidonic acid-induced DEA1 precursor [Solanum lycopersicum]
Solyc08g079700.1	83.266	52.723	-0.697692	7.14531e-05	XP_010325448.1|3.0e-94|zinc finger A20 and AN1 domain-containing stress-associated protein 1 [Solanum lycopersicum]
Solyc06g065670.2	1.463	0.893	-0.697862	0.0315125	XP_015079414.1|0.0e+00|ABC transporter G family member 32-like isoform X1 [Solanum pennellii]
Solyc07g056470.2	12.226	7.55	-0.698143	0.00314971	XP_004243196.1|7.7e-139|probable glutathione S-transferase [Solanum lycopersicum]
Solyc02g087210.2	16.45	10.226	-0.699096	0.00193929	NP_001306921.1|6.2e-111|stress-associated protein 11 [Solanum lycopersicum]
Solyc11g008530.1	6.576	4.13	-0.699841	1.16094e-06	NP_001316343.1|0.0e+00|endoribonuclease Dicer 2d [Solanum lycopersicum]
Solyc04g005620.2	40.953	25.793	-0.69989	6.00021e-05	XP_004237043.1|2.4e-95|casparian strip membrane protein 2-like [Solanum lycopersicum]
Solyc01g106610.2	268.713	169.63	-0.699915	6.93956e-08	NP_001234128.2|4.8e-104|pathogenesis-related protein 1A1 precursor [Solanum lycopersicum]
Solyc11g005040.1	12.433	7.756	-0.70023	0.00368069	XP_010312452.1|5.5e-208|protein translocase subunit SECA2, chloroplastic isoform X2 [Solanum lycopersicum]
Solyc12g014530.1	3.103	1.893	-0.700558	0.022179	XP_015061783.1|0.0e+00|L-aspartate oxidase, chloroplastic [Solanum pennellii]
Solyc09g065660.2	14.496	9.323	-0.702604	1.99422e-05	XP_025888690.1|2.5e-218|heat stress transcription factor A-7a isoform X4 [Solanum lycopersicum]
Solyc11g011080.1	3.856	2.376	-0.703923	0.00775349	XP_019066548.2|0.0e+00|TMV resistance protein N-like [Solanum lycopersicum]
Solyc04g016330.2	5.883	3.64	-0.704188	0.0027134	XP_006358005.1|2.4e-266|PREDICTED: probable glycerol-3-phosphate dehydrogenase [NAD(+)] 1, cytosolic [Solanum tuberosum]
Solyc07g017510.2	2.296	1.423	-0.706847	0.00024592	XP_010323385.1|0.0e+00|1-phosphatidylinositol-3-phosphate 5-kinase FAB1B [Solanum lycopersicum]
Solyc10g005950.2	12.01	7.42	-0.706972	0.000620758	XP_004248336.1|1.3e-161|nudix hydrolase 2 [Solanum lycopersicum]
BGI_novel_G000059	1.87	1.15	-0.709208	0.00202308
Solyc01g005470.2	32.66	20.32	-0.709371	0.000736899	XP_004228721.1|3.2e-100|protein PLANT CADMIUM RESISTANCE 2 [Solanum lycopersicum]
Solyc07g041750.2	17.436	10.73	-0.710076	5.41423e-08	XP_004243713.1|0.0e+00|O-fucosyltransferase 35 [Solanum lycopersicum]
Solyc02g086360.2	94.606	57.38	-0.710595	0.0294671	XP_004232331.1|0.0e+00|uncharacterized protein LOC101261085 [Solanum lycopersicum]
Solyc05g015840.2	5.873	3.626	-0.711867	0.0119243	XP_004239238.1|3.6e-179|teosinte glume architecture 1 [Solanum lycopersicum]
Solyc07g043000.2	941.836	589.936	-0.712571	6.64991e-20	Q00451.1|1.9e-53|RecName: Full=36.4 kDa proline-rich protein
Solyc05g015390.2	112.706	70.56	-0.712819	7.9163e-10	XP_004239210.1|1.7e-126|REF/SRPP-like protein At1g67360 [Solanum lycopersicum]
Solyc01g091110.2	35.32	22.013	-0.71538	1.22752e-05	XP_010325652.1|1.3e-117|21 kDa protein-like [Solanum lycopersicum]
Solyc07g042550.2	1501.56	934.01	-0.715387	8.45959e-10	XP_019227610.1|0.0e+00|PREDICTED: sucrose synthase [Nicotiana attenuata]
Solyc02g087410.2	5.92	3.653	-0.718233	3.67918e-06	XP_004232253.1|0.0e+00|ABC transporter B family member 15-like [Solanum lycopersicum]
Solyc01g067300.2	63.196	39.013	-0.719795	0.000435348	XP_004229219.1|1.5e-104|CASP-like protein 1 [Solanum lycopersicum]
Solyc07g063870.2	53.136	33.003	-0.720051	1.0339e-09	XP_004244170.1|1.1e-183|uncharacterized protein LOC101263228 isoform X2 [Solanum lycopersicum]
Solyc08g076470.2	22.733	14.043	-0.720702	4.55072e-08	NP_001292996.1|3.6e-267|glycerol-3-phosphate acyltransferase [Solanum lycopersicum]
Solyc01g095460.2	42.14	26.156	-0.720898	6.9555e-11	XP_025887867.1|4.3e-263|transcriptional activator TAF-1 isoform X2 [Solanum lycopersicum]
Solyc12g094380.1	26.706	16.48	-0.722558	0.000365894	XP_004253137.1|7.4e-128|uncharacterized protein LOC101254074 [Solanum lycopersicum]
Solyc02g032860.2	13.356	8.263	-0.722965	0.000372359	XP_004231612.1|5.1e-268|5'-adenylylsulfate reductase 3, chloroplastic [Solanum lycopersicum]
Solyc10g083730.1	52.363	32.27	-0.723367	0.000412782	XP_004249466.1|2.3e-177|F-box protein PP2-A15 [Solanum lycopersicum]
Solyc07g042490.1	28.71	17.773	-0.723605	0.00606957	XP_004243682.1|1.0e-68|auxin-responsive protein SAUR78 [Solanum lycopersicum]
Solyc04g007500.1	21.76	13.176	-0.724135	0.0305572	XP_015072864.1|6.0e-87|E3 ubiquitin-protein ligase RHA2A [Solanum pennellii]
Solyc04g015120.2	25.34	14.283	-0.724674	0.000286044	XP_004236649.1|1.9e-154|U-box domain-containing protein 36 [Solanum lycopersicum]
Solyc02g081830.2	40.623	25.096	-0.726403	2.51821e-06	XP_025885237.1|8.7e-157|haloacid dehalogenase-like hydrolase domain-containing protein 3 isoform X1 [Solanum lycopersicum]
Solyc10g009240.2	5.533	3.366	-0.726426	0.0022729	XP_009606335.1|3.7e-275|PREDICTED: 3-ketoacyl-CoA synthase 1 [Nicotiana tomentosiformis]
Solyc08g063000.2	22.643	13.753	-0.728652	1.56593e-05	XP_004245088.1|8.5e-195|nucleosome assembly protein 1;2-like [Solanum lycopersicum]
Solyc03g033750.1	30.243	18.593	-0.728962	0.00510914	PHT49782.1|1.5e-30|hypothetical protein CQW23_09529 [Capsicum baccatum]
Solyc01g009160.2	61.533	37.57	-0.729779	0.000302684	NP_001315302.1|1.9e-152|harpin-induced1-like [Solanum lycopersicum]
Solyc02g036480.1	25.913	15.896	-0.730046	0.000217983	XP_010315726.1|7.3e-148|NDR1/HIN1-like protein 6 [Solanum lycopersicum]
Solyc10g080050.1	13.276	8.06	-0.730726	0.00505334	XP_019071552.1|6.8e-146|protein MIZU-KUSSEI 1-like [Solanum lycopersicum]
Solyc07g007330.1	108.706	67.193	-0.731501	2.38893e-07	XP_010323270.1|1.4e-109|uncharacterized protein LOC101254911 [Solanum lycopersicum]
Solyc07g053890.2	11.146	6.933	-0.732	0.000200352	XP_004243360.1|9.1e-273|O-acyltransferase WSD1 [Solanum lycopersicum]
Solyc09g008840.2	26.896	16.443	-0.733323	7.26676e-06	XP_004246578.1|5.1e-296|pyruvate kinase 1, cytosolic [Solanum lycopersicum]
Solyc08g078880.2	8.746	5.333	-0.734584	1.84563e-05	XP_004246149.1|0.0e+00|cation/H(+) antiporter 15 [Solanum lycopersicum]
Solyc03g112970.1	7.223	4.323	-0.734598	0.021414	XP_019068232.1|5.3e-152|uncharacterized protein LOC101250877 [Solanum lycopersicum]
Solyc05g055430.2	6.82	3.483	-0.735264	0.000456986	XP_010321338.1|1.6e-128|uncharacterized protein LOC101266725 [Solanum lycopersicum]
Solyc05g047550.2	2	1.263	-0.73604	0.0241598	XP_019069345.1|0.0e+00|U-box domain-containing protein 35-like [Solanum lycopersicum]
Solyc01g088820.2	11.83	7.18	-0.736102	0.000487785	XP_004229727.1|7.9e-192|trihelix transcription factor ASIL2 [Solanum lycopersicum]
Solyc03g115960.2	7.336	4.4	-0.736135	0.00997905	XP_004236009.1|6.1e-213|GDSL esterase/lipase At1g74460 [Solanum lycopersicum]
Solyc08g077230.2	8.31	5.06	-0.738302	4.45015e-05	NP_001266246.1|0.0e+00|two-component response regulator-like APRR2-like [Solanum lycopersicum]
Solyc05g005280.2	6.38	3.826	-0.7391	0.00947292	XP_004238657.1|3.4e-181|probable inactive poly [ADP-ribose] polymerase SRO2 [Solanum lycopersicum]
Solyc02g086670.2	80.886	49.533	-0.740372	1.87226e-10	XP_004232308.1|1.8e-239|shaggy-related protein kinase epsilon isoform X1 [Solanum lycopersicum]
Solyc01g098560.2	9.896	6.003	-0.741415	4.03277e-05	XP_006361887.1|4.0e-258|PREDICTED: sugar transporter ERD6-like 5 [Solanum tuberosum]
Solyc10g006250.2	14.316	8.753	-0.742072	4.53799e-11	XP_004248293.1|6.5e-74|splicing factor, suppressor of white-apricot homolog isoform X1 [Solanum lycopersicum]
Solyc11g011680.1	3.513	2.096	-0.74259	0.0140262	XP_025886514.1|1.3e-41|auxin-induced protein 15A-like [Solanum lycopersicum]
Solyc12g013580.1	7.34	4.48	-0.743556	0.000388956	XP_004251848.1|3.3e-252|peptidyl-prolyl cis-trans isomerase CYP37, chloroplastic isoform X2 [Solanum lycopersicum]
Solyc05g054620.2	254.76	155.626	-0.743781	8.88632e-09	XP_004239778.1|4.9e-245|ACT domain-containing protein ACR9 [Solanum lycopersicum]
Solyc02g084780.2	361.97	221.533	-0.744238	1.62856e-16	NP_001334930.1|3.6e-187|peroxidase superfamily protein precursor [Solanum lycopersicum]
Solyc00g072400.2	2161.83	1323.02	-0.745786	2.05532e-16	XP_004253400.1|3.6e-181|peroxidase 70 [Solanum lycopersicum]
Solyc11g068940.1	3.9	2.29	-0.74595	0.0349056	XP_004251097.1|1.3e-242|E3 ubiquitin-protein ligase PUB23 [Solanum lycopersicum]
Solyc11g069240.1	36.153	22.426	-0.746199	2.79913e-10	XP_004251118.1|5.2e-258|protein indeterminate-domain 9 [Solanum lycopersicum]
Solyc12g005720.1	43.706	26.62	-0.746743	3.91738e-06	XP_004251507.1|1.4e-140|cysteine-rich repeat secretory protein 38 [Solanum lycopersicum]
Solyc10g024360.1	3.376	2.013	-0.746916	0.00451378	XP_015056406.1|0.0e+00|potassium channel AKT2/3-like [Solanum pennellii]
Solyc01g008130.2	31.976	19.396	-0.748327	3.74996e-08	XP_010315277.1|1.8e-251|uncharacterized protein LOC101246461 isoform X1 [Solanum lycopersicum]
Solyc01g086660.2	34.16	20.826	-0.749215	0.00028417	KZM96950.1|2.0e-07|hypothetical protein DCAR_015688 [Daucus carota subsp. sativus]
Solyc03g119250.2	19.146	11.93	-0.750699	6.67321e-06	XP_004235786.1|4.2e-252|protein SAR DEFICIENT 1 [Solanum lycopersicum]
Solyc04g014290.1	44.18	26.523	-0.752142	0.0258552	XP_010319537.1|1.9e-58|protein PELPK1-like [Solanum lycopersicum]
Solyc06g062440.2	5.563	3.37	-0.753466	8.277e-06	XP_010322858.1|0.0e+00|putative late blight resistance protein homolog R1B-23 [Solanum lycopersicum]
Solyc10g047170.1	118.4	71.77	-0.754363	4.94278e-12	NP_001275426.1|0.0e+00|high affinity sulfate transporter type 1 [Solanum tuberosum]
Solyc08g007480.1	27.89	16.79	-0.754492	0.000809633	XP_004244577.1|1.4e-118|uncharacterized protein LOC101267255 [Solanum lycopersicum]
Solyc12g100050.1	88.97	54.423	-0.754527	1.1198e-08	XP_004252869.1|6.8e-103|protein slowmo homolog [Solanum lycopersicum]
Solyc08g078910.1	197.996	121.76	-0.755569	6.99423e-08	XP_004245750.1|1.1e-70|14 kDa proline-rich protein DC2.15 [Solanum lycopersicum]
Solyc09g007520.2	212.913	129.21	-0.756513	3.03561e-16	XP_004246673.1|5.1e-188|peroxidase 21 [Solanum lycopersicum]
Solyc02g063430.2	10.47	6.25	-0.757157	0.000709304	XP_004233470.1|2.5e-182|transcription factor bHLH93 [Solanum lycopersicum]
Solyc11g069510.1	24.353	14.67	-0.757348	8.22121e-06	XP_004251141.1|3.2e-188|GATA transcription factor 11-like isoform X1 [Solanum lycopersicum]
Solyc02g091260.1	20.163	11.933	-0.758601	0.0254755	PHT91322.1|4.2e-60|hypothetical protein T459_06435 [Capsicum annuum]
BGI_novel_G000138	28.91	17.366	-0.758904	1.69289e-06
Solyc02g086180.2	26.22	15.813	-0.758912	1.32463e-07	NP_001352901.1|5.6e-166|delta(7)-sterol-C5(6)-desaturase [Solanum lycopersicum]
Solyc01g060260.2	5.506	3.183	-0.759167	0.0298173	XP_004228997.1|5.8e-112|uncharacterized protein LOC101258403 isoform X2 [Solanum lycopersicum]
Solyc02g081010.1	31.993	19.386	-0.760867	1.04145e-11	XP_004233782.1|0.0e+00|lysine-specific demethylase JMJ25 [Solanum lycopersicum]
Solyc02g087070.2	27.146	16.206	-0.760991	6.9106e-05	NP_001234410.2|0.0e+00|alpha-DOX1 [Solanum lycopersicum]
Solyc11g066080.1	21.686	13.03	-0.761069	3.90263e-05	XP_004250964.1|2.7e-156|uncharacterized protein LOC101256552 [Solanum lycopersicum]
Solyc02g062460.2	12.233	7.27	-0.761214	4.16281e-06	XP_004233541.1|2.4e-187|probable 2-oxoglutarate-dependent dioxygenase AOP1 [Solanum lycopersicum]
Solyc11g010390.1	514.593	315.013	-0.763638	3.72622e-13	XP_010312897.1|1.1e-73|classical arabinogalactan protein 10-like [Solanum lycopersicum]
Solyc08g079190.1	74.13	45.01	-0.764847	8.11103e-05	XP_004245730.1|1.2e-75|14 kDa proline-rich protein DC2.15 [Solanum lycopersicum]
Solyc07g054430.2	60.64	35.723	-0.766096	5.22671e-05	XP_004243327.1|1.8e-179|formimidoyltransferase-cyclodeaminase [Solanum lycopersicum]
Solyc10g086630.1	32.84	19.59	-0.770718	0.0340033	XP_006349491.1|2.0e-25|PREDICTED: uncharacterized protein LOC102595547 [Solanum tuberosum]
Solyc05g047580.2	12.646	7.623	-0.77163	1.45528e-07	XP_016468708.1|0.0e+00|PREDICTED: cycloartenol synthase-like [Nicotiana tabacum]
Solyc08g079200.1	17.06	10.013	-0.77206	0.0216525	XP_004245729.1|1.8e-73|14 kDa proline-rich protein DC2.15-like [Solanum lycopersicum]
Solyc02g084860.1	64.736	39.04	-0.77363	2.91444e-06	XP_004232435.1|3.0e-74|bZIP transcription factor 11-like [Solanum lycopersicum]
Solyc02g085830.2	10.053	5.873	-0.774591	0.00791077	XP_004232368.1|1.0e-114|IST1 homolog [Solanum lycopersicum]
Solyc02g069980.2	12.743	7.57	-0.77629	2.8898e-07	XP_010316951.1|2.3e-283|uncharacterized protein LOC101258431 isoform X1 [Solanum lycopersicum]
Solyc05g005100.2	20.316	12.08	-0.77641	3.47211e-08	NP_001311461.1|0.0e+00|protein trichome birefringence-like 2 [Solanum lycopersicum]
Solyc09g074890.1	315.363	191.813	-0.780117	4.63116e-14	XP_010326583.1|1.1e-61|rapid alkalinization factor [Solanum lycopersicum]
Solyc12g100060.1	253.173	152.31	-0.780255	3.46292e-08	NP_001332859.1|5.0e-86|stress-associated protein 10 [Solanum lycopersicum]
Solyc04g058160.1	26.37	15.64	-0.782855	2.40829e-05	XP_004237356.1|4.2e-85|probable calcium-binding protein CML44 [Solanum lycopersicum]
Solyc06g050530.2	18.503	10.863	-0.784751	0.000120433	XP_004240885.1|0.0e+00|laccase-5-like [Solanum lycopersicum]
Solyc12g005430.1	5.436	3.123	-0.786218	0.0103694	XP_015060914.1|4.7e-246|acetyl-CoA-benzylalcohol acetyltransferase-like [Solanum pennellii]
Solyc05g006430.1	33.56	19.9	-0.786591	1.22979e-16	XP_004239363.2|0.0e+00|formin-like protein 4 [Solanum lycopersicum]
Solyc09g098160.2	26.16	15.483	-0.786868	4.77424e-08	NP_001234292.1|2.1e-169|pirin-like protein [Solanum lycopersicum]
Solyc04g079470.2	119.19	70.8	-0.786982	4.13452e-17	XP_004238193.1|4.1e-222|serpin-ZX [Solanum lycopersicum]
Solyc11g005820.1	18.633	10.926	-0.787436	0.00119864	XP_004249898.1|3.3e-105|cell wall / vacuolar inhibitor of fructosidase 2 [Solanum lycopersicum]
Solyc05g054120.1	30.52	18.02	-0.787569	0.00143671	XP_004239826.1|2.5e-67|cysteine proteinase inhibitor 5 [Solanum lycopersicum]
Solyc09g082690.2	9.946	5.75	-0.789672	0.00402113	NP_001307185.1|3.4e-102|early light inducible protein [Solanum lycopersicum]
Solyc10g055820.1	80.136	47.3	-0.79106	2.91008e-08	XP_004248635.1|1.8e-199|endochitinase 3-like [Solanum lycopersicum]
Solyc10g007900.2	6.553	3.6	-0.791353	0.0027536	XP_025883550.1|2.3e-144|cytochrome P450 CYP72A219-like isoform X2 [Solanum lycopersicum]
Solyc06g062920.2	21.486	12.646	-0.792517	3.95655e-10	NP_001234561.1|3.4e-273|auxin-regulated dual specificity cytosolic kinase [Solanum lycopersicum]
Solyc07g063940.1	20.106	11.833	-0.792531	4.28808e-08	NP_001293105.1|0.0e+00|GRAS2 protein [Solanum lycopersicum]
Solyc01g095440.2	5.843	3.343	-0.793101	0.0107606	XP_010326792.1|1.7e-174|uncharacterized protein LOC104649398 [Solanum lycopersicum]
Solyc02g062550.2	3.003	1.7	-0.79441	0.0183417	XP_004233533.1|3.8e-283|protein HYPER-SENSITIVITY-RELATED 4 [Solanum lycopersicum]
Solyc06g071410.2	19.073	11.193	-0.795353	1.08848e-07	XP_004241510.1|1.6e-232|serine/threonine-protein kinase STY13 [Solanum lycopersicum]
Solyc03g026220.2	141.036	83.226	-0.796178	6.25252e-19	XP_004234356.1|3.5e-195|BAG family molecular chaperone regulator 1 [Solanum lycopersicum]
Solyc03g119080.2	77.006	45.323	-0.797397	2.04964e-14	NP_001234620.2|0.0e+00|beta-mannosidase precursor [Solanum lycopersicum]
Solyc10g085880.1	24.84	14.556	-0.799745	6.88879e-08	K4D422.1|4.2e-199|RecName: Full=UDP-glycosyltransferase 73C4; Short=SlUGT73C4
Solyc03g059130.1	2.546	1.44	-0.800829	0.0365358
Solyc04g015700.1	24.64	14.16	-0.801441	0.0476603	PHU17443.1|3.8e-40|hypothetical protein BC332_13138 [Capsicum chinense]
Solyc12g056510.1	98.55	57.853	-0.802473	9.28831e-18	XP_010314480.1|0.0e+00|trihelix transcription factor GT-2-like [Solanum lycopersicum]
Solyc09g007020.1	67.12	39.503	-0.802531	2.02199e-05	NP_001307969.1|3.8e-94|pathogenesis-related protein precursor [Solanum lycopersicum]
Solyc07g056570.1	3.006	1.683	-0.803527	0.0194191	NP_001234455.1|0.0e+00|nine-cis-epoxycarotenoid dioxygenase [Solanum lycopersicum]
Solyc01g079740.2	9.953	5.68	-0.804369	0.00367805	PHT59886.1|8.0e-116|hypothetical protein CQW23_02249, partial [Capsicum baccatum]
Solyc09g074270.2	116.686	68.243	-0.806415	3.30532e-13	NP_001234767.2|2.3e-204|gibberellin receptor GID1b-1 [Solanum lycopersicum]
Solyc02g086810.1	11.563	6.626	-0.81046	0.00115759	XP_004232296.1|1.6e-153|uncharacterized protein LOC101250946 [Solanum lycopersicum]
Solyc03g093410.2	104.13	60.7	-0.811743	4.45061e-18	PHU22776.1|4.5e-270|Hexose carrier protein HEX6 [Capsicum chinense]
Solyc09g090130.2	46.023	26.583	-0.813671	5.77663e-06	XP_004247733.1|2.1e-156|transcription factor MYB4 [Solanum lycopersicum]
Solyc06g074390.2	4.983	2.826	-0.814103	0.00236853	XP_004241314.1|1.4e-282|fatty acyl-CoA reductase 3 [Solanum lycopersicum]
Solyc07g014730.2	22.98	13.173	-0.816444	0.000245552	XP_004242879.1|7.1e-88|phospholipase A2-alpha [Solanum lycopersicum]
Solyc10g076400.1	11.286	6.406	-0.818044	0.00236825	XP_010327722.1|7.9e-253|protein trichome birefringence-like 34 [Solanum lycopersicum]
Solyc04g053130.2	25.38	14.666	-0.81948	2.97777e-07	XP_004237444.1|8.1e-106|stress enhanced protein 2, chloroplastic [Solanum lycopersicum]
Solyc03g078470.2	2.87	1.626	-0.823476	0.000358905	XP_006355136.1|1.4e-49|PREDICTED: calmodulin-binding receptor-like cytoplasmic kinase 2 [Solanum tuberosum]
Solyc08g008360.2	10.78	6.043	-0.824334	0.00708584	XP_004244637.1|3.2e-109|uncharacterized protein LOC101260843 [Solanum lycopersicum]
Solyc10g076220.1	376.71	217.92	-0.825792	4.16044e-17	XP_004249056.1|6.9e-180|peroxidase 70-like [Solanum lycopersicum]
Solyc02g072000.2	7.19	4.083	-0.826659	5.48806e-05	XP_004233050.1|4.8e-240|heat stress transcription factor A-4c [Solanum lycopersicum]
Solyc10g006310.2	55.51	32.106	-0.826836	1.66608e-12	XP_004248379.1|1.7e-62|protein FATTY ACID EXPORT 5-like [Solanum lycopersicum]
Solyc06g054150.1	10.596	5.91	-0.827242	0.0103413	XP_004241050.1|6.6e-115|uncharacterized protein LOC101260945 [Solanum lycopersicum]
Solyc05g052680.1	17.173	9.823	-0.829258	1.29285e-06	XP_004239935.1|3.9e-269|BAHD acyltransferase DCR [Solanum lycopersicum]
Solyc08g068680.2	8.053	4.443	-0.829766	0.00565532	NP_001233845.1|2.1e-280|aromatic amino acid decarboxylase 1A [Solanum lycopersicum]
Solyc07g008140.2	162.096	93.36	-0.831118	2.3759e-11	XP_010323300.1|3.5e-136|cucumber peeling cupredoxin [Solanum lycopersicum]
Solyc03g005550.2	2.143	1.186	-0.833159	0.0203302	XP_019068294.1|2.6e-294|serine/threonine-protein phosphatase 7 long form homolog [Solanum lycopersicum]
Solyc01g008620.2	33.106	18.973	-0.833171	1.18731e-10	NP_001234798.2|4.4e-195|glucan endo-1,3-beta-glucosidase A precursor [Solanum lycopersicum]
Solyc08g063040.2	16.243	9.27	-0.833335	3.4519e-08	XP_004245090.1|1.0e-282|protein indeterminate-domain 12 [Solanum lycopersicum]
Solyc08g083240.2	113.8	65.386	-0.834811	4.43428e-25	XP_004245451.1|7.4e-284|protein IQ-DOMAIN 1-like [Solanum lycopersicum]
Solyc02g080440.2	12.746	7.256	-0.835926	9.41663e-08	XP_015066351.1|0.0e+00|UPF0051 protein ABCI8, chloroplastic [Solanum pennellii]
Solyc07g066360.1	111.743	64.813	-0.835936	0.00160252	PHU13250.1|4.6e-27|hypothetical protein BC332_20180 [Capsicum chinense]
Solyc02g064620.2	3.17	1.62	-0.837938	0.00078731	XP_010317176.1|0.0e+00|uncharacterized protein LOC101266601 isoform X2 [Solanum lycopersicum]
Solyc05g005460.2	50.306	28.73	-0.839781	3.79236e-15	XP_004238662.1|0.0e+00|probable nucleoredoxin 1 [Solanum lycopersicum]
Solyc02g084800.2	346.936	198.083	-0.840785	4.52254e-13	XP_004232440.1|8.9e-165|peroxidase 72 [Solanum lycopersicum]
Solyc02g084630.2	11.313	6.356	-0.842671	7.85362e-05	NP_001311309.1|8.5e-126|TDR6 transcription factor [Solanum lycopersicum]
Solyc01g094720.2	6.986	3.9	-0.843117	0.000627912	XP_010326478.1|0.0e+00|ascorbate transporter, chloroplastic [Solanum lycopersicum]
Solyc08g082870.2	8.653	4.876	-0.843692	4.65906e-06	NP_001332937.1|6.4e-184|NAD(P)-binding Rossmann-fold superfamily protein [Solanum lycopersicum]
Solyc01g107170.2	41.07	22.963	-0.845211	8.61144e-05	NP_001266186.1|1.4e-180|ZF2 protein [Solanum lycopersicum]
Solyc10g080010.1	14.833	8.366	-0.846494	6.99055e-07	XP_004249254.1|2.3e-305|EGF domain-specific O-linked N-acetylglucosamine transferase [Solanum lycopersicum]
Solyc03g095860.2	2.953	1.603	-0.848443	0.0111557	XP_004235236.1|4.9e-271|ankyrin-3 [Solanum lycopersicum]
Solyc03g113710.2	3.93	2.183	-0.850361	0.000143379	XP_004236516.1|0.0e+00|formin-like protein 4 [Solanum lycopersicum]
Solyc09g066140.2	8.93	5.083	-0.850701	6.09747e-09	XP_004247345.1|0.0e+00|probable myosin-binding protein 4 [Solanum lycopersicum]
Solyc03g093270.2	43.906	24.806	-0.850919	2.29971e-08	XP_004235168.1|1.1e-184|NADPH-dependent aldo-keto reductase, chloroplastic-like [Solanum lycopersicum]
Solyc06g072330.2	11.076	6.37	-0.852512	0.00084558	XP_004241472.1|3.3e-54|mitochondrial import inner membrane translocase subunit TIM14-3-like [Solanum lycopersicum]
Solyc07g056480.2	38.133	21.583	-0.852661	5.64458e-11	NP_001234379.2|1.0e-127|glutathione S-transferase/peroxidase [Solanum lycopersicum]
Solyc01g058720.2	14.736	8.22	-0.853322	0.000259609	XP_004229015.1|2.0e-75|calcium-binding protein CP1 [Solanum lycopersicum]
Solyc04g011600.2	4.92	2.683	-0.853652	0.0062243	XP_004236735.1|4.2e-283|glycerol-3-phosphate acyltransferase 5-like [Solanum lycopersicum]
Solyc09g082270.2	178.84	101.85	-0.855122	1.58822e-20	XP_004247575.1|5.0e-90|non-specific lipid-transfer protein-like protein At2g13820 [Solanum lycopersicum]
Solyc01g102330.2	135.486	76.716	-0.855196	1.53204e-14	XP_004230370.1|5.6e-153|probable carbohydrate esterase At4g34215 [Solanum lycopersicum]
Solyc05g009550.2	14.203	7.966	-0.855357	1.22933e-07	XP_004238941.1|2.0e-239|uncharacterized protein LOC101258366 [Solanum lycopersicum]
Solyc09g014350.2	8.3	4.593	-0.855365	0.000414788	NP_001315360.1|5.0e-291|glycerol-3-phosphate 2-O-acyltransferase 6 [Solanum lycopersicum]
Solyc01g109720.2	9.16	5.076	-0.855543	0.000225524	XP_004230956.1|8.3e-168|monoacylglycerol lipase abhd6-A [Solanum lycopersicum]
Solyc01g103320.2	17.156	10.783	-0.855648	7.68788e-12	XP_015165025.1|1.0e-129|PREDICTED: zinc finger CCCH domain-containing protein 19-like isoform X3 [Solanum tuberosum]
Solyc02g069290.2	23.993	13.493	-0.85698	1.34438e-11	XP_004233209.1|0.0e+00|putative E3 ubiquitin-protein ligase LIN isoform X2 [Solanum lycopersicum]
Solyc06g035490.2	7.326	4.036	-0.8574	0.00102494	NP_001333234.1|1.4e-149|basic helix-loop-helix (bHLH) DNA-binding superfamily protein [Solanum lycopersicum]
Solyc12g013690.1	13.543	7.726	-0.858409	2.32021e-05	XP_004251850.1|9.9e-232|monooxygenase 2 [Solanum lycopersicum]
Solyc06g076280.1	13.43	7.54	-0.858696	5.84424e-11	XP_004241220.1|0.0e+00|scarecrow-like protein 14 [Solanum lycopersicum]
Solyc11g010500.1	87.203	48.466	-0.863457	3.15095e-06	XP_004250140.1|1.2e-179|mitochondrial uncoupling protein 5 [Solanum lycopersicum]
Solyc01g098730.2	46.443	26.083	-0.86627	3.0445e-12	XP_004230173.1|8.4e-154|E3 ubiquitin-protein ligase ATL6 [Solanum lycopersicum]
Solyc12g096030.1	12.566	6.943	-0.867423	7.5532e-05	XP_004253090.1|8.2e-195|solute carrier family 25 member 44-like [Solanum lycopersicum]
Solyc01g089890.2	9.52	5.286	-0.867726	0.00149898	XP_015085535.1|1.0e-96|uncharacterized protein LOC107028834 [Solanum pennellii]
Solyc04g081860.2	52.163	29.143	-0.867771	6.9788e-10	XP_004238381.1|3.7e-178|peroxidase 64-like [Solanum lycopersicum]
Solyc07g006700.1	12.066	6.366	-0.871247	0.035313	XP_004242675.1|8.7e-117|pathogenesis-related protein PR-1 [Solanum lycopersicum]
Solyc05g013690.2	39.166	21.783	-0.875038	1.03989e-10	PHU02900.1|3.6e-204|Esterase [Capsicum chinense]
Solyc10g009550.2	2.46	1.266	-0.875093	0.0398233	XP_004248079.1|1.4e-168|probable WRKY transcription factor 30 [Solanum lycopersicum]
Solyc09g011520.2	21.376	11.74	-0.876961	2.27086e-05	XP_004246386.1|1.9e-127|probable glutathione S-transferase [Solanum lycopersicum]
Solyc03g007370.2	5.07	2.72	-0.877118	0.00251809	XP_004234179.1|2.6e-288|RNA polymerase sigma factor sigE, chloroplastic/mitochondrial isoform X1 [Solanum lycopersicum]
Solyc03g007350.1	3.263	1.756	-0.87815	0.00205185	XP_010317475.1|0.0e+00|pentatricopeptide repeat-containing protein At3g16610-like [Solanum lycopersicum]
Solyc09g065440.2	18.86	10.22	-0.88103	0.00101163	XP_004247183.1|2.6e-144|leucine-rich repeat extensin-like protein 5 [Solanum lycopersicum]
Solyc08g075830.2	382.853	213.166	-0.881259	6.28107e-18	XP_004245974.1|1.1e-184|peroxidase 27-like [Solanum lycopersicum]
Solyc01g068420.2	10.353	5.646	-0.881987	7.87348e-05	XP_004229288.2|8.9e-225|protein trichome birefringence-like 41 [Solanum lycopersicum]
Solyc09g074450.1	21.036	11.446	-0.883676	0.0030207	XP_015086422.1|4.7e-66|classical arabinogalactan protein 26-like [Solanum pennellii]
Solyc08g066160.2	146.95	81.906	-0.883722	6.25809e-15	XP_010325064.1|5.4e-55|early nodulin-93 [Solanum lycopersicum]
Solyc06g005070.1	8.523	4.99	-0.886093	1.70908e-06	XP_004240340.1|4.0e-180|protein NRT1/ PTR FAMILY 3.1-like [Solanum lycopersicum]
Solyc02g093420.2	3.116	1.726	-0.889117	0.00474017	XP_004231842.1|4.9e-239|SUPPRESSOR OF GAMMA RESPONSE 1 [Solanum lycopersicum]
Solyc08g067960.2	24.036	13.166	-0.88977	3.36653e-12	XP_004245246.1|6.4e-199|probable E3 ubiquitin-protein ligase RZFP34 [Solanum lycopersicum]
Solyc05g043360.1	8.246	4.47	-0.890854	2.71548e-05	XP_004240153.1|0.0e+00|laccase-7-like [Solanum lycopersicum]
Solyc12g009000.1	5.416	2.726	-0.891672	0.0441588	XP_004251678.1|8.9e-288|protein ALP1-like [Solanum lycopersicum]
Solyc01g101260.2	11.333	6.053	-0.89259	0.00246655	PHT97238.1|3.1e-31|hypothetical protein BC332_33839 [Capsicum chinense]
Solyc07g062600.2	27.823	15.113	-0.893812	7.72575e-13	XP_010324387.1|0.0e+00|increased DNA methylation 1 isoform X2 [Solanum lycopersicum]
Solyc04g074680.1	15.91	8.29	-0.895985	0.0158423	XP_016571533.1|2.7e-58|PREDICTED: uncharacterized protein LOC107869513 [Capsicum annuum]
Solyc05g052300.2	3.396	1.726	-0.896746	0.0304749	XP_004239963.1|3.6e-243|amino acid transporter AVT6C [Solanum lycopersicum]
Solyc12g094390.1	12.996	6.886	-0.896782	0.00309934	XP_004253207.1|7.7e-139|uncharacterized protein At1g76070-like [Solanum lycopersicum]
Solyc03g078100.2	1.806	0.926	-0.898589	0.0228016	XP_004235080.1|0.0e+00|probable pectinesterase/pectinesterase inhibitor 51 [Solanum lycopersicum]
Solyc01g006620.2	1.286	0.65	-0.899524	0.0340445	XP_019069263.1|0.0e+00|FT-interacting protein 1-like [Solanum lycopersicum]
Solyc04g072380.2	6.883	3.723	-0.900801	1.7503e-07	XP_004237857.1|0.0e+00|uncharacterized protein LOC101263206 [Solanum lycopersicum]
Solyc02g088340.2	21.28	11.543	-0.901071	2.56286e-07	NP_001334317.1|3.3e-273|WRKY transcription factor 3 [Solanum lycopersicum]
Solyc08g068070.2	81.02	44.41	-0.903091	1.6587e-11	XP_004245251.1|2.5e-94|two-on-two hemoglobin-3 [Solanum lycopersicum]
Solyc12g006380.1	10.95	5.85	-0.903132	0.000112193	NP_001234624.1|3.2e-213|2-oxoglutarate-dependent dioxygenase [Solanum lycopersicum]
Solyc11g072990.1	5.08	2.663	-0.906956	0.00265889	XP_004251303.1|8.3e-275|3-ketoacyl-CoA synthase 3 [Solanum lycopersicum]
Solyc02g091700.2	119.676	65.4	-0.9074	6.27298e-15	XP_015169122.1|1.7e-88|PREDICTED: uncharacterized protein At5g65660 isoform X1 [Solanum tuberosum]
Solyc02g078150.2	9.7	5.096	-0.907513	0.00266051	XP_015064173.1|5.5e-182|uncharacterized protein LOC107009366 [Solanum pennellii]
Solyc02g080850.1	2.39	1.2	-0.908729	0.0298237	XP_004232696.1|1.6e-237|probable F-box protein At4g22030 [Solanum lycopersicum]
Solyc01g087560.2	277.9	151.49	-0.909181	2.27227e-18	XP_004229650.1|1.4e-204|cycloartenol-C-24-methyltransferase 1 [Solanum lycopersicum]
Solyc03g112700.1	4.01	2.013	-0.909465	0.0305315	XP_004236227.1|4.2e-188|uncharacterized protein LOC101256758 [Solanum lycopersicum]
Solyc03g078770.2	5.126	2.71	-0.910036	0.000507191	XP_004235055.1|1.4e-273|7-deoxyloganetic acid glucosyltransferase [Solanum lycopersicum]
Solyc01g095750.2	9.896	5.303	-0.910667	5.65631e-06	XP_019188238.1|0.0e+00|PREDICTED: long chain acyl-CoA synthetase 4-like [Ipomoea nil]
Solyc03g005310.2	16.84	9.096	-0.910941	2.59607e-09	XP_004234024.1|1.0e-263|armadillo repeat-containing protein LFR [Solanum lycopersicum]
Solyc05g014790.2	32.003	17.356	-0.913036	5.70255e-19	XP_015076364.1|0.0e+00|lipoxygenase 6, chloroplastic [Solanum pennellii]
Solyc02g092580.2	288.083	156.516	-0.915887	2.05469e-24	XP_004231908.1|2.9e-190|peroxidase 51 [Solanum lycopersicum]
Solyc03g123600.2	1.79	0.93	-0.915988	0.0114023	XP_015162214.1|1.9e-252|PREDICTED: alanine aminotransferase 2-like isoform X2 [Solanum tuberosum]
Solyc09g090510.2	2.653	1.35	-0.916277	0.00789711	XP_016456911.1|0.0e+00|PREDICTED: uncharacterized protein LOC107780831 isoform X1 [Nicotiana tabacum]
Solyc07g054270.2	53.503	28.836	-0.917552	2.27803e-10	XP_004243335.1|9.0e-184|uncharacterized protein LOC101263727 [Solanum lycopersicum]
Solyc07g042190.2	107.776	58.26	-0.921474	5.55828e-17	XP_004243694.1|2.8e-133|protein MARD1 [Solanum lycopersicum]
Solyc02g093970.2	15.343	8.246	-0.921619	1.64444e-12	XP_004231792.1|0.0e+00|probable inactive leucine-rich repeat receptor-like protein kinase At3g03770 [Solanum lycopersicum]
Solyc08g013900.2	1.136	0.566	-0.92188	0.0201655	XP_004244743.1|0.0e+00|protein NLP9-like [Solanum lycopersicum]
Solyc11g020230.1	7.263	3.823	-0.924295	2.4258e-05	XP_004250410.1|0.0e+00|serine/threonine-protein kinase-like protein CCR4 [Solanum lycopersicum]
Solyc03g080080.2	47.43	25.416	-0.92516	1.25485e-11	XP_004235036.1|1.6e-268|uncharacterized calcium-binding protein At1g02270 isoform X2 [Solanum lycopersicum]
BGI_novel_G000072	2	1.026	-0.9369	0.00178528
Solyc01g106920.2	8.596	4.493	-0.939111	7.06464e-05	XP_016539416.1|1.5e-289|PREDICTED: nucleobase-ascorbate transporter 4 [Capsicum annuum]
Solyc01g096940.2	6.646	3.46	-0.940185	2.94005e-05	XP_004230068.1|0.0e+00|probable inactive leucine-rich repeat receptor-like protein kinase At3g03770 [Solanum lycopersicum]
Solyc03g116700.2	10.716	5.43	-0.940921	0.00442483	XP_004235961.1|2.6e-102|cucumber peeling cupredoxin [Solanum lycopersicum]
Solyc11g005200.1	29.973	15.843	-0.945406	7.75839e-09	XP_004249857.1|5.6e-165|prolyl 4-hydroxylase 1 isoform X1 [Solanum lycopersicum]
Solyc07g040710.2	5.06	2.566	-0.946394	0.00113564	XP_015081689.1|2.9e-290|IQ domain-containing protein IQM1-like [Solanum pennellii]
Solyc05g052570.2	54.436	26.16	-0.94808	0.0318489	XP_004239943.1|1.6e-226|zinc finger CCCH domain-containing protein 29 [Solanum lycopersicum]
Solyc01g102410.2	135.103	71.38	-0.948313	5.18882e-16	XP_004230376.1|0.0e+00|glutamate--tRNA ligase, cytoplasmic [Solanum lycopersicum]
Solyc11g072920.1	56.333	29.733	-0.949437	6.23503e-13	XP_004251296.1|5.6e-185|peroxidase 15-like [Solanum lycopersicum]
Solyc02g092880.2	138.766	73.606	-0.950436	3.81432e-17	NP_001294929.1|1.8e-95|uncharacterized protein LOC101250067 isoform 2 [Solanum lycopersicum]
Solyc09g074280.1	13.2	6.89	-0.952517	1.6563e-07	XP_004247547.1|2.2e-264|uncharacterized protein LOC101261854 [Solanum lycopersicum]
Solyc01g109680.2	34.203	17.973	-0.952979	1.85439e-08	XP_004230977.1|7.0e-45|uncharacterized protein LOC101246482 [Solanum lycopersicum]
Solyc03g064030.2	19.873	10.433	-0.953454	1.31271e-11	XP_004234845.1|1.3e-210|protein ABHD18 [Solanum lycopersicum]
Solyc11g068430.1	432.346	232.793	-0.953696	3.092e-16	XP_004251055.1|6.9e-67|ferredoxin, root R-B1 [Solanum lycopersicum]
Solyc05g006160.2	40.31	21.036	-0.953985	1.90532e-06	XP_015075702.1|8.5e-34|snakin-2-like [Solanum pennellii]
Solyc03g112750.2	16.833	8.836	-0.955872	7.17228e-11	NP_001289839.1|0.0e+00|protein TORNADO 1 [Solanum lycopersicum]
Solyc12g099500.1	19.176	9.59	-0.956078	0.0110301	XP_015060596.1|1.1e-56|uncharacterized protein LOC107006594 [Solanum pennellii]
Solyc04g055250.2	22.23	11.57	-0.956248	1.75033e-06	XP_004237390.1|8.9e-105|uncharacterized protein LOC101258942 [Solanum lycopersicum]
Solyc08g077020.1	18.726	9.506	-0.956302	0.00438309	XP_004245888.1|9.2e-64|auxin-responsive protein SAUR76 [Solanum lycopersicum]
Solyc06g060680.1	8.733	4.32	-0.958731	0.00677832	XP_004242003.1|1.4e-163|putative wall-associated receptor kinase-like 16 [Solanum lycopersicum]
Solyc10g081040.1	18.926	9.38	-0.960416	0.00670579	XP_004249332.1|1.1e-100|calmodulin-binding protein 25 [Solanum lycopersicum]
Solyc08g078940.1	248.063	132.08	-0.960668	5.94089e-15	XP_019070948.1|3.3e-78|14 kDa proline-rich protein DC2.15 [Solanum lycopersicum]
Solyc05g010460.2	3.866	1.903	-0.962715	0.00849561	XP_004239000.1|1.4e-238|uncharacterized protein LOC101251181 [Solanum lycopersicum]
Solyc09g005970.1	2.68	1.346	-0.962989	0.00122226	XP_004246729.1|0.0e+00|ABC transporter G family member 20 [Solanum lycopersicum]
Solyc09g008560.2	58.263	30.483	-0.964933	5.85378e-18	NP_001353341.1|7.3e-221|putative 2OG-Fe(II) oxygenase GIM2-like [Solanum lycopersicum]
Solyc08g075320.2	69.563	36.246	-0.965858	8.25456e-12	XP_004246018.1|3.8e-270|abscisic acid 8'-hydroxylase 1 [Solanum lycopersicum]
Solyc07g055780.2	3.66	1.773	-0.966005	0.00501756	XP_004243780.1|4.1e-211|protein trichome birefringence-like 43 isoform X1 [Solanum lycopersicum]
Solyc03g062900.2	18.52	9.656	-0.968342	1.33921e-11	XP_010317900.1|6.2e-302|uncharacterized protein LOC101264799 isoform X1 [Solanum lycopersicum]
Solyc06g068960.1	9.816	4.826	-0.969861	0.0107233	XP_004241666.2|5.3e-85|calcium-binding allergen Ole e 8 [Solanum lycopersicum]
BGI_novel_G000490	4.28	2.06	-0.970706	0.0195931
Solyc04g080540.2	1439.84	752.926	-0.971426	3.88387e-14	XP_004238295.1|4.7e-76|uncharacterized protein LOC101245159 [Solanum lycopersicum]
Solyc04g076190.1	88.966	46.23	-0.971594	2.44426e-13	XP_004237984.1|6.0e-251|aspartyl protease AED3 [Solanum lycopersicum]
Solyc01g097550.2	24.19	12.54	-0.971823	5.35983e-11	XP_004230108.1|4.2e-174|annexin D4-like [Solanum lycopersicum]
Solyc09g009490.2	12.883	6.63	-0.972288	1.75896e-07	XP_010325918.1|5.7e-246|protein ABSCISIC ACID-INSENSITIVE 5 isoform X1 [Solanum lycopersicum]
Solyc12g087940.1	230.79	119.253	-0.972797	3.03644e-09	XP_004252715.1|4.4e-257|aspartyl protease AED3 [Solanum lycopersicum]
Solyc12g042890.1	11.363	5.633	-0.973556	0.00326191	PHT46123.1|1.4e-130|hypothetical protein CQW23_15281 [Capsicum baccatum]
Solyc10g080690.1	26.643	13.723	-0.974561	5.02834e-08	XP_004249303.1|5.6e-241|patatin-like protein 3 [Solanum lycopersicum]
Solyc02g080060.1	11.01	5.826	-0.974995	2.57496e-08	XP_015063951.1|1.5e-101|putative receptor-like protein kinase At4g00960 [Solanum pennellii]
Solyc01g080910.2	11.13	5.7	-0.976935	2.82362e-07	XP_004229510.1|7.0e-180|uncharacterized protein LOC101252815 [Solanum lycopersicum]
Solyc04g056310.2	2.143	0.98	-0.977751	0.0483114	XP_004237385.1|1.6e-189|transcription factor MYB53-like [Solanum lycopersicum]
Solyc01g087980.2	36.493	16.76	-0.977861	0.0419139	PHT59721.1|4.8e-114|hypothetical protein CQW23_02084 [Capsicum baccatum]
Solyc02g089250.2	256.496	132.59	-0.980056	1.07742e-16	XP_004232133.1|1.2e-222|formin-2 [Solanum lycopersicum]
Solyc07g017980.1	33.87	16.8	-0.980279	0.00547538	XP_006367895.1|3.7e-49|PREDICTED: periaxin-like [Solanum tuberosum]
Solyc07g063730.1	1.036	0.47	-0.98325	0.0414421	XP_025888026.1|0.0e+00|uncharacterized protein LOC101244686 [Solanum lycopersicum]
Solyc03g097600.2	12.503	6.223	-0.984093	0.00039846	XP_004235333.1|2.1e-165|bidirectional sugar transporter SWEET10-like [Solanum lycopersicum]
Solyc03g026210.2	2.606	1.32	-0.984602	0.0390424	XP_004234357.1|5.7e-163|dihydrodipicolinate reductase-like protein CRR1, chloroplastic isoform X2 [Solanum lycopersicum]
Solyc08g067260.2	1.88	0.876	-0.987052	0.0261641	XP_004245205.1|2.4e-280|3-ketoacyl-CoA synthase 10 [Solanum lycopersicum]
Solyc01g100610.2	27.163	13.953	-0.987688	5.32767e-16	XP_004230316.1|0.0e+00|solute carrier family 40 member 3, chloroplastic [Solanum lycopersicum]
Solyc09g011550.2	17.576	8.763	-0.988868	0.000122113	XP_004246383.1|9.1e-123|probable glutathione S-transferase [Solanum lycopersicum]
Solyc01g109120.2	8.04	4.063	-0.989222	3.33334e-07	XP_004230841.1|1.4e-272|protein JINGUBANG [Solanum lycopersicum]
Solyc01g086640.2	92.966	47.92	-0.98934	1.02735e-28	XP_015062938.1|0.0e+00|O-fucosyltransferase 20-like [Solanum pennellii]
Solyc09g075610.2	7.546	3.63	-0.989378	0.0104397	XP_004247383.1|1.4e-52|GATA transcription factor 23-like [Solanum lycopersicum]
Solyc06g073940.2	14.46	7.39	-0.989499	1.26147e-11	XP_004241354.1|6.5e-130|protein FAF-like, chloroplastic [Solanum lycopersicum]
Solyc03g080070.2	5.246	2.57	-0.990523	0.00193929	XP_010318066.1|2.3e-221|WAT1-related protein At5g64700-like [Solanum lycopersicum]
Solyc09g098420.1	0.953	0.453	-0.990867	0.007878	XP_010326916.1|0.0e+00|leucine-rich repeat receptor protein kinase MSP1-like [Solanum lycopersicum]
Solyc06g074140.1	2.5	1.153	-0.99112	0.0271418	XP_004241334.1|4.3e-238|E3 ubiquitin-protein ligase PUB24-like [Solanum lycopersicum]
Solyc03g113660.2	19.913	10.133	-0.991233	3.29271e-09	XP_019232008.1|3.4e-171|PREDICTED: uncharacterized protein LOC109212788 [Nicotiana attenuata]
Solyc01g066570.2	11.3	5.686	-0.992631	9.19641e-06	XP_004229254.1|3.6e-72|uncharacterized protein LOC101258100 [Solanum lycopersicum]
Solyc02g090210.2	15.036	7.59	-0.993482	9.97222e-07	XP_015065183.1|2.2e-215|GDSL esterase/lipase At2g23540 [Solanum pennellii]
Solyc03g121890.1	28.756	14.7	-0.994442	7.95882e-17	XP_015067660.1|0.0e+00|formin-like protein 20 [Solanum pennellii]
Solyc07g062630.1	1.496	0.693	-0.997671	0.0201494	XP_010324385.1|0.0e+00|ABC transporter G family member 10 [Solanum lycopersicum]
Log2<=-1
Solyc03g082370.1	31.516	14.94	-1.0017	0.0207248	XP_004235017.1|1.1e-42|uncharacterized protein LOC101248276 [Solanum lycopersicum]
BGI_novel_G000320	3.103	1.51	-1.00446	0.000469429
Solyc07g052530.2	199.056	101.606	-1.00448	1.15276e-21	XP_004243459.1|8.0e-186|peroxidase 3-like [Solanum lycopersicum]
Solyc02g083730.2	58.056	29.196	-1.00545	4.73054e-07	XP_004232500.1|2.6e-68|thiosulfate sulfurtransferase 18 isoform X2 [Solanum lycopersicum]
Solyc03g117290.1	44.023	22.35	-1.00584	2.81331e-07	XP_019068676.1|7.2e-79|uncharacterized protein LOC101263595 [Solanum lycopersicum]
Solyc06g066520.1	62.486	31.863	-1.00779	2.2721e-09	XP_004241748.1|3.8e-80|uncharacterized protein LOC101252785 [Solanum lycopersicum]
Solyc12g007160.1	17.303	8.61	-1.00828	1.25628e-05	XP_004252057.2|7.7e-142|probable protein ABIL5 [Solanum lycopersicum]
Solyc07g056320.2	3.79	1.846	-1.00882	0.000291754	XP_004243204.1|0.0e+00|glycerol-3-phosphate acyltransferase 1 [Solanum lycopersicum]
Solyc06g068460.2	18.806	9.356	-1.00895	2.53341e-07	NP_001234301.2|2.4e-204|WRKY transcription factor 40 [Solanum lycopersicum]
Solyc08g059710.2	9.996	5.003	-1.00895	2.29264e-08	XP_004245019.1|0.0e+00|uncharacterized protein LOC101256695 [Solanum lycopersicum]
Solyc06g076070.1	27.83	13.48	-1.0104	0.0112239
Solyc03g119530.2	419.593	213.693	-1.01077	1.03044e-27	XP_004235815.1|3.1e-141|LOB domain-containing protein 40 [Solanum lycopersicum]
Solyc12g039080.1	2.043	0.99	-1.01135	0.0180318	XP_025888725.1|4.2e-131|probable LRR receptor-like serine/threonine-protein kinase At1g67720 isoform X2 [Solanum lycopersicum]
Solyc08g008610.2	4.716	2.27	-1.01348	0.00123255	XP_004244657.1|2.9e-274|probable lysophospholipase BODYGUARD 3 [Solanum lycopersicum]
Solyc03g005530.1	172.286	86.493	-1.0148	1.42499e-10	AIU41747.1|5.9e-285|phosphorus transporter PT2 [Lycium barbarum]
Solyc03g005560.1	172.286	86.493	-1.0148	1.42499e-10	AIU41747.1|5.9e-285|phosphorus transporter PT2 [Lycium barbarum]
Solyc11g006740.1	11.91	5.45	-1.01481	0.0453213	XP_004249952.2|4.3e-105|putative F-box protein PP2-B12 [Solanum lycopersicum]
Solyc04g005050.1	22.57	11.19	-1.01489	5.2584e-07	NP_001266203.1|1.5e-218|matrix metalloproteinase precursor [Solanum lycopersicum]
Solyc04g074420.1	25.773	11.69	-1.0166	0.0380061	XP_006363272.1|5.3e-45|PREDICTED: protein EXORDIUM-like [Solanum tuberosum]
Solyc01g008520.2	6.473	2.806	-1.01772	5.98027e-07	XP_010315090.1|5.5e-191|DNA repair protein XRCC2 homolog isoform X1 [Solanum lycopersicum]
Solyc04g081930.2	28.693	14.076	-1.01928	7.7681e-11	XP_004238387.1|6.1e-153|probable prolyl 4-hydroxylase 3 [Solanum lycopersicum]
Solyc06g053700.1	13.996	6.546	-1.02154	0.0123642	XP_004241015.1|5.8e-60|uncharacterized protein At4g14450, chloroplastic [Solanum lycopersicum]
Solyc07g007320.1	30.463	15.196	-1.02261	2.88525e-10	XP_010323268.1|8.3e-152|uncharacterized protein LOC101257679 [Solanum lycopersicum]
Solyc01g009650.1	5.1	2.5	-1.02529	0.00311566	XP_004228860.1|3.6e-49|transcription factor LAF1-like [Solanum lycopersicum]
Solyc06g051930.2	2.843	1.366	-1.02677	0.000158668	NP_001333899.1|0.0e+00|pyruvate kinase superfamily protein [Solanum lycopersicum]
Solyc01g087090.2	101.236	50.873	-1.02752	7.52494e-13	XP_010324427.1|7.2e-32|uncharacterized protein LOC104648574 [Solanum lycopersicum]
Solyc12g096900.1	7.023	3.403	-1.02757	8.00549e-05	XP_004253023.1|2.1e-220|protein PHLOEM PROTEIN 2-LIKE A8 [Solanum lycopersicum]
Solyc03g083480.2	20.97	10.43	-1.02829	2.19522e-11	XP_004234949.1|2.5e-184|LEAF RUST 10 DISEASE-RESISTANCE LOCUS RECEPTOR-LIKE PROTEIN KINASE-like 2.1 [Solanum lycopersicum]
Solyc04g074810.2	4.936	2.273	-1.0289	0.00930908	XP_004237957.1|4.1e-197|transcription factor bHLH94-like [Solanum lycopersicum]
Solyc02g014730.2	4.313	2.066	-1.029	0.000388524	XP_004231497.1|0.0e+00|cytochrome P450 86B1 [Solanum lycopersicum]
Solyc03g115930.1	11.923	5.676	-1.03246	0.000997968	XP_004236035.1|7.9e-113|probable calcium-binding protein CML30 [Solanum lycopersicum]
Solyc07g054760.1	64.473	31.953	-1.03295	0.000448925	XP_004243310.1|1.1e-41|uncharacterized protein LOC101254813 [Solanum lycopersicum]
Solyc01g096100.2	102.726	51.086	-1.03817	2.79606e-23	XP_025887975.1|3.4e-282|uncharacterized protein LOC101256522 isoform X1 [Solanum lycopersicum]
BGI_novel_G000325	58.943	28.87	-1.04037	2.25974e-06
Solyc01g005990.2	45.503	22.46	-1.04048	7.22635e-12	XP_004228722.1|1.8e-106|protein YLS3 [Solanum lycopersicum]
BGI_novel_G000039	1.186	0.526	-1.04082	0.0183417
Solyc08g067690.1	18.136	8.493	-1.04403	3.56167e-06	XP_010325142.1|1.0e-71|uncharacterized protein LOC104648856 [Solanum lycopersicum]
Solyc08g077910.2	126.55	62.4	-1.04487	4.22312e-12	XP_004245822.1|3.3e-148|expansin-like B1 [Solanum lycopersicum]
Solyc11g011110.1	7.086	3.356	-1.04811	0.000259512	XP_004250176.1|7.7e-215|GDSL esterase/lipase At5g37690 [Solanum lycopersicum]
Solyc05g054250.1	19.7	9.5	-1.04893	1.61892e-06	XP_010321387.1|1.3e-194|uncharacterized protein LOC104647562 [Solanum lycopersicum]
Solyc06g066500.1	23.626	11.343	-1.05001	0.000201338	XP_004241749.1|6.4e-80|uncharacterized protein LOC101253388 [Solanum lycopersicum]
Solyc03g007690.1	15.25	7.406	-1.05583	1.03448e-10	XP_004234202.1|0.0e+00|ABC transporter G family member 4 [Solanum lycopersicum]
Solyc09g090750.2	16.466	7.923	-1.05659	1.05545e-06	XP_004247776.1|6.7e-140|haloacid dehalogenase-like hydrolase domain-containing protein At2g33255 [Solanum lycopersicum]
Solyc10g017490.1	2.57	1.213	-1.05695	0.0031227	XP_010327322.1|3.1e-239|integrin-linked protein kinase 1-like isoform X1 [Solanum lycopersicum]
Solyc08g014360.1	10.24	4.803	-1.05799	0.000167526	XP_025888310.1|3.1e-163|probable cinnamyl alcohol dehydrogenase 6 [Solanum lycopersicum]
Solyc09g082530.1	69.156	33.516	-1.07088	1.6334e-16	XP_020534120.1|1.5e-155|leucine-rich repeat extensin-like protein 6 [Jatropha curcas]
Solyc02g080220.2	116.296	56.443	-1.07336	8.19574e-23	XP_010316615.1|0.0e+00|pectinesterase-like [Solanum lycopersicum]
Solyc05g008910.2	1.52	0.616	-1.07468	0.0395707	XP_010320742.1|0.0e+00|putative glutamine amidotransferase GAT1_2.1 isoform X1 [Solanum lycopersicum]
Solyc02g084980.2	15.693	7.493	-1.07492	8.56772e-10	NP_001234668.2|5.6e-202|galactinol synthase 2 [Solanum lycopersicum]
Solyc11g007180.1	2.633	1.113	-1.07791	0.0202951	XP_010312542.1|6.0e-209|GDSL esterase/lipase At5g03610-like [Solanum lycopersicum]
Solyc11g011600.1	0.926	0.393	-1.07906	0.015185	XP_010312721.1|6.0e-48|putative GEM-like protein 8 isoform X3 [Solanum lycopersicum]
Solyc06g082560.1	3.073	1.423	-1.08071	7.67647e-05	XP_006345133.1|0.0e+00|PREDICTED: chaperone protein ClpB1 [Solanum tuberosum]
Solyc07g054240.2	1.733	1.086	-1.08147	0.00755468	XP_025887872.1|5.1e-46|uncharacterized protein LOC101263333 isoform X1 [Solanum lycopersicum]
Solyc02g094180.2	106.353	51.333	-1.08247	3.5195e-26	XP_010315910.1|3.3e-185|peroxidase 51 [Solanum lycopersicum]
Solyc01g066720.2	298.946	144.846	-1.08445	2.32221e-21	XP_004229248.1|1.1e-48|uncharacterized protein LOC101256324 [Solanum lycopersicum]
Solyc04g082880.2	102.326	49.096	-1.08467	1.95926e-18	APW83754.1|0.0e+00|pyrophosphate fructose 6-phosphate 1- phosphotransferase subunit alpha, partial [Lycium barbarum]
Solyc04g071890.2	418.53	202.25	-1.08518	1.97647e-42	NP_001334411.1|2.6e-196|peroxidase 12 precursor [Solanum lycopersicum]
Solyc10g055810.1	740.056	342.146	-1.08639	1.85351e-05	NP_001234403.1|5.1e-199|basic 30 kDa endochitinase precursor [Solanum lycopersicum]
Solyc10g081970.1	57.873	27.613	-1.08673	2.77875e-07	XP_015055240.1|1.7e-77|NDR1/HIN1-like protein 3 [Solanum pennellii]
Solyc02g093070.2	2.483	1.016	-1.08975	0.0266522	XP_010315986.1|4.5e-193|probable 2-oxoglutarate-dependent dioxygenase At3g50210 [Solanum lycopersicum]
Solyc07g055690.1	54.07	25.453	-1.09646	1.29741e-12	XP_019070503.1|7.5e-265|epidermis-specific secreted glycoprotein EP1 [Solanum lycopersicum]
Solyc10g008400.1	113.75	54.09	-1.09704	1.63431e-12	XP_004248161.1|4.6e-130|E3 ubiquitin-protein ligase RMA1H1 [Solanum lycopersicum]
Solyc12g100010.1	12.146	5.766	-1.10142	2.05145e-19	XP_019066835.1|0.0e+00|receptor-like protein Cf-9 [Solanum lycopersicum]
Solyc08g078930.1	550.25	266.15	-1.10172	1.62747e-22	XP_015084513.1|3.8e-71|14 kDa proline-rich protein DC2.15-like [Solanum pennellii]
Solyc01g005390.2	24.006	11.19	-1.10303	1.49792e-06	XP_004228715.1|1.2e-88|nudix hydrolase 18, mitochondrial [Solanum lycopersicum]
Solyc01g087150.2	36.906	17.233	-1.10759	2.00039e-20	XP_004229626.1|7.9e-294|protein DETOXIFICATION 43 [Solanum lycopersicum]
Solyc04g005610.2	3.986	1.696	-1.11082	0.00453964	NP_001352326.1|1.5e-162|transcription factors SNAC9 [Solanum lycopersicum]
Solyc03g093290.2	7.996	3.65	-1.1109	4.20447e-06	XP_004235170.1|9.5e-168|NADPH-dependent aldo-keto reductase, chloroplastic-like [Solanum lycopersicum]
Solyc03g019980.1	5.656	2.623	-1.11528	2.34306e-11	XP_004234341.1|0.0e+00|putative receptor-like protein kinase At3g47110 [Solanum lycopersicum]
Solyc06g054290.1	12.133	5.393	-1.11655	0.00104728	XP_016463210.1|4.6e-60|PREDICTED: 2-hydroxyisoflavanone dehydratase-like [Nicotiana tabacum]
Solyc06g066750.2	65.166	30.62	-1.12211	8.41323e-16	XP_004241726.1|3.3e-71|thionin-like protein 2 [Solanum lycopersicum]
Solyc12g005390.1	138.013	62.02	-1.1233	2.54505e-23	XP_004251492.1|2.4e-123|vesicle-associated protein 4-1 [Solanum lycopersicum]
Solyc01g067010.2	2.363	1.003	-1.12571	0.00394548	XP_010321279.1|5.4e-216|F-box/kelch-repeat protein At3g23880 [Solanum lycopersicum]
Solyc03g080060.1	5.033	2.253	-1.12771	1.37916e-05	XP_004235037.1|0.0e+00|L-type lectin-domain containing receptor kinase VIII.2 [Solanum lycopersicum]
Solyc05g056470.1	17.276	7.933	-1.12826	5.67807e-10	XP_004239636.1|0.0e+00|ABC transporter G family member 5 [Solanum lycopersicum]
Solyc05g049980.2	416.43	193.743	-1.12932	5.31576e-21	XP_004240097.1|1.0e-288|probable polygalacturonase [Solanum lycopersicum]
Solyc06g060470.1	4.383	1.82	-1.13095	0.00777434	XP_004242290.1|3.8e-138|protein MKS1-like [Solanum lycopersicum]
Solyc12g010430.1	73.166	34.066	-1.13253	7.09895e-10	XP_010313842.1|3.4e-75|uncharacterized protein LOC101250190 [Solanum lycopersicum]
Solyc02g091990.2	3.296	1.43	-1.13555	0.000644292	AMD43823.1|1.8e-251|1-aminocyclopropane-1-carboxylate synthase 3 [Petunia x hybrida]
Solyc03g112340.1	55.82	25.816	-1.13669	1.49601e-19	XP_004236256.1|5.3e-230|E3 ubiquitin-protein ligase ATL31 [Solanum lycopersicum]
Solyc09g091600.2	9.563	4.21	-1.13875	9.5019e-05	XP_004247838.1|1.1e-165|protein SULFUR DEFICIENCY-INDUCED 2 [Solanum lycopersicum]
Solyc09g075910.1	2.01	0.87	-1.14092	0.000321742	XP_004247525.1|0.0e+00|G-type lectin S-receptor-like serine/threonine-protein kinase LECRK4 [Solanum lycopersicum]
Solyc01g105430.2	2.163	0.926	-1.14126	0.00896812	PHT64136.1|1.1e-24|ABC transporter G family member 13 [Capsicum annuum]
Solyc03g120040.2	16.296	6.24	-1.14179	1.39551e-11	XP_004235717.1|3.2e-151|uncharacterized protein LOC101252763 [Solanum lycopersicum]
Solyc01g106390.2	11.81	5.4	-1.14269	3.96881e-14	XP_004230651.1|6.1e-309|glutamyl-tRNA reductase 1, chloroplastic-like [Solanum lycopersicum]
Solyc03g115920.2	22.476	10.093	-1.14288	3.95581e-07	XP_004236033.1|5.4e-163|probable E3 ubiquitin-protein ligase RNF217 [Solanum lycopersicum]
Solyc08g005150.2	29.37	13.496	-1.14359	8.49141e-18	XP_004244398.1|0.0e+00|E3 ubiquitin-protein ligase RNF14 [Solanum lycopersicum]
Solyc09g072880.2	10.016	2.606	-1.14393	1.45653e-09	NP_001332946.1|3.2e-178|protein FLUORESCENT IN BLUE LIGHT, chloroplastic-like isoform 1 [Solanum lycopersicum]
Solyc01g107710.2	12.666	5.47	-1.14609	0.000314556	XP_004230746.1|9.6e-246|uncharacterized protein LOC101254643 [Solanum lycopersicum]
Solyc10g008160.2	2.893	1.076	-1.15926	0.0109777	NP_001266252.1|1.6e-110|transcription factor GLK2 [Solanum lycopersicum]
Solyc12g005400.1	3.36	1.49	-1.15949	2.95968e-07	XP_004251491.1|0.0e+00|cyclic nucleotide-gated ion channel 4 [Solanum lycopersicum]
Solyc08g078770.1	1.42	0.576	-1.16041	0.00469416	XP_019070647.1|0.0e+00|uncharacterized protein LOC109120852 [Solanum lycopersicum]
Solyc06g069710.2	2.803	1.11	-1.16047	0.0113599	XP_004241586.1|3.0e-200|NAC domain-containing protein 100 [Solanum lycopersicum]
Solyc06g053310.2	163.743	74.75	-1.16301	1.31276e-26	XP_004240981.1|3.8e-189|hydroxyacylglutathione hydrolase 2, mitochondrial isoform X1 [Solanum lycopersicum]
Solyc06g007580.1	10.57	4.473	-1.16834	0.000442767	XP_004240436.1|1.9e-171|uncharacterized protein LOC101250804 [Solanum lycopersicum]
Solyc08g077480.2	31.346	14.036	-1.17137	7.60048e-11	XP_004245848.1|7.0e-107|myb-like protein D [Solanum lycopersicum]
Solyc02g082260.2	173.493	78.56	-1.17159	2.88825e-29	NP_001296810.1|0.0e+00|3-hydroxy-3-methylglutaryl-coenzyme A reductase 1 [Solanum lycopersicum]
Solyc05g043420.1	0.666	0.263	-1.17319	0.00690757	XP_019069506.1|0.0e+00|putative late blight resistance protein homolog R1A-3 [Solanum lycopersicum]
Solyc08g077900.2	242.503	109.533	-1.17353	1.58138e-20	XP_004245823.1|1.2e-151|expansin-like B1 [Solanum lycopersicum]
Solyc03g120870.2	28.17	12.446	-1.17404	1.54795e-08	XP_004235654.1|5.6e-112|CASP-like protein 3A1 [Solanum lycopersicum]
Solyc07g047740.2	172.03	77.616	-1.17427	2.99283e-19	NP_001234644.2|5.7e-187|peroxidase precursor [Solanum lycopersicum]
Solyc10g055800.1	896.496	405.556	-1.17491	3.24118e-24	XP_004248637.1|4.2e-204|endochitinase 4 [Solanum lycopersicum]
Solyc11g019910.1	38.6	17.276	-1.17554	1.95118e-10	XP_004250403.1|2.8e-107|pectinesterase inhibitor 4 [Solanum lycopersicum]
Solyc06g050980.2	69.443	31.28	-1.1821	1.37422e-32	XP_010322166.1|1.2e-138|ferritin-1, chloroplastic [Solanum lycopersicum]
Solyc10g079420.1	153.456	69.213	-1.1825	4.81645e-20	XP_004249249.1|8.0e-113|probable calcium-binding protein CML36 [Solanum lycopersicum]
Solyc03g083500.2	25.6	11.333	-1.18473	7.72195e-10	XP_004234947.1|6.9e-118|uncharacterized protein LOC101252159 [Solanum lycopersicum]
Solyc07g008620.1	41.673	18.663	-1.18584	2.74651e-34	Q6JN47.2|0.0e+00|RecName: Full=Receptor-like protein EIX1; AltName: Full=EIX receptor 1; Flags: Precursor
Solyc11g073060.1	3.313	1.053	-1.1915	0.0490531	XP_004251306.1|6.9e-85|zinc finger protein ZAT11-like [Solanum lycopersicum]
Solyc01g107720.2	4.9	1.983	-1.19393	0.00107991	XP_004231392.1|2.6e-238|uncharacterized protein LOC101257909 [Solanum lycopersicum]
Solyc01g094120.2	4.516	1.906	-1.19842	1.45957e-05	XP_004229925.2|2.1e-301|cytochrome P450 704C1-like [Solanum lycopersicum]
Solyc03g046380.1	12.08	4.186	-1.19853	0.032631	XP_004234699.1|3.0e-39|uncharacterized protein LOC101259411 [Solanum lycopersicum]
Solyc05g006390.1	42.026	17.603	-1.19956	0.00061423	XP_009784881.1|1.1e-31|PREDICTED: uncharacterized protein LOC104233217 [Nicotiana sylvestris]
Solyc11g015900.1	9.513	4.106	-1.20063	4.4095e-08	XP_025884089.1|6.3e-220|F-box protein At3g07870-like [Solanum lycopersicum]
Solyc01g105180.2	38.26	16.643	-1.20376	2.61894e-21	XP_004230566.1|2.3e-231|protein DA1 isoform X1 [Solanum lycopersicum]
Solyc07g022830.2	55.336	24.446	-1.20386	3.583e-21	XP_004243116.1|1.2e-275|SPX and EXS domain-containing protein 1 isoform X1 [Solanum lycopersicum]
Solyc06g035790.2	33.483	14.686	-1.21227	4.1687e-26	XP_004240739.1|0.0e+00|probable methyltransferase PMT15 [Solanum lycopersicum]
BGI_novel_G000630	5.883	1.916	-1.21817	0.0327026
Solyc03g097510.1	5.643	2.09	-1.21946	0.010917	XP_015069405.1|6.9e-88|auxin-responsive protein SAUR50-like [Solanum pennellii]
Solyc02g081450.2	48.32	20.886	-1.21979	1.73382e-15	XP_004232659.1|3.0e-150|NDR1/HIN1-like protein 6 [Solanum lycopersicum]
Solyc09g009420.1	14.223	5.813	-1.22146	0.000321742	NP_001352415.1|4.8e-86|uncharacterized protein LOC101264052 [Solanum lycopersicum]
Solyc01g081630.2	9.976	4.3	-1.22309	1.43127e-09	XP_010323476.1|9.9e-214|protein UPSTREAM OF FLC isoform X1 [Solanum lycopersicum]
Solyc03g019690.1	8.193	3.273	-1.22312	0.000891174	XP_004234308.1|3.3e-125|serine protease inhibitor 5 [Solanum lycopersicum]
Solyc03g080030.2	134.103	58.573	-1.22403	3.25363e-12	XP_004235040.1|3.0e-50|major latex allergen Hev b 5-like [Solanum lycopersicum]
Solyc07g052540.2	175.39	76.713	-1.22419	5.35075e-31	XP_004243458.1|6.2e-186|peroxidase 3-like [Solanum lycopersicum]
Solyc09g005830.1	2.15	0.85	-1.22666	0.000565628	XP_004246739.1|0.0e+00|exocyst complex component EXO70H1 [Solanum lycopersicum]
Solyc02g082420.2	26.196	11.256	-1.22796	5.51654e-12	XP_004232585.1|1.3e-107|RING-H2 finger protein ATL8-like [Solanum lycopersicum]
Solyc02g079540.1	0.78	0.283	-1.2282	0.0112421	XP_019067880.2|0.0e+00|uncharacterized protein LOC101264400 [Solanum lycopersicum]
Solyc10g081980.1	173.56	75.213	-1.22979	3.89577e-17	XP_019071725.1|1.9e-131|NDR1/HIN1-like protein 3 isoform X2 [Solanum lycopersicum]
BGI_novel_G000567	0.213	0	-1.23113	0.0461345
Solyc03g097610.2	1.126	0.326	-1.23218	0.0447124	XP_004235339.1|1.8e-155|bidirectional sugar transporter SWEET10 [Solanum lycopersicum]
Solyc06g083940.1	4.453	2.013	-1.23406	0.00067167	XP_015166492.1|5.1e-48|PREDICTED: transcriptional regulator TAC1 [Solanum tuberosum]
Solyc01g104830.2	71.77	31.093	-1.23704	2.92471e-23	XP_015166099.1|1.3e-107|PREDICTED: vacuolar iron transporter homolog 4-like [Solanum tuberosum]
Solyc03g116890.2	8.196	3.393	-1.23849	3.63769e-05	NP_001303844.1|4.2e-197|probable WRKY transcription factor 40 [Solanum lycopersicum]
Solyc12g049140.1	3.936	1.39	-1.25344	0.00993774	XP_010314317.1|2.0e-153|adhesive plaque matrix protein-like [Solanum lycopersicum]
Solyc05g025680.1	0.58	0.16	-1.25989	0.0404946	XP_004239582.1|0.0e+00|respiratory burst oxidase homolog protein E-like isoform X1 [Solanum lycopersicum]
Solyc11g017280.1	0.333	0.09	-1.26089	0.042299	XP_004250590.2|0.0e+00|leucine-rich repeat receptor-like tyrosine-protein kinase PXC3 [Solanum lycopersicum]
Solyc08g008120.2	58.266	24.47	-1.2673	1.11106e-12	NP_001353870.1|2.0e-47|uncharacterized protein LOC101255014 [Solanum lycopersicum]
Solyc04g081970.2	4.68	1.853	-1.27235	1.66233e-05	XP_004238392.1|1.5e-166|thioredoxin-like protein CDSP32, chloroplastic [Solanum lycopersicum]
Solyc08g068770.1	11.986	4.4	-1.27466	0.00220406	NP_001316134.1|1.3e-138|N-hydroxycinnamoyl-CoA:tyramine N-hydroxycinnamoyl transferase [Solanum lycopersicum]
Solyc03g083100.2	14.97	6.196	-1.27713	1.0821e-13	XP_004234970.1|1.1e-273|protein IQ-DOMAIN 1 [Solanum lycopersicum]
Solyc06g076800.2	16.916	6.936	-1.27787	4.02982e-10	PHT46706.1|2.0e-294|Cytochrome 86A7 [Capsicum baccatum]
Solyc02g067580.2	409.02	173.036	-1.27802	8.14011e-30	NP_001316528.1|1.6e-45|NADH-ubiquinone reductase complex 1 MLRQ subunit-like protein [Solanum lycopersicum]
Solyc02g081770.1	0.873	0.25	-1.28017	0.0303525	XP_004233769.1|3.2e-260|acetyl-CoA-benzylalcohol acetyltransferase-like [Solanum lycopersicum]
Solyc12g019140.1	13.16	5.386	-1.28158	1.54405e-10	XP_004251990.1|1.2e-231|polygalacturonase-like [Solanum lycopersicum]
Solyc06g005280.1	1.733	0.64	-1.28172	0.00128426	XP_004240606.1|0.0e+00|exocyst complex component EXO70H1-like [Solanum lycopersicum]
Solyc06g082050.1	0.96	0.233	-1.28239	0.0427242	XP_010323136.1|5.8e-201|uncharacterized protein LOC101245266 isoform X3 [Solanum lycopersicum]
Solyc09g018010.2	0.84	0.04	-1.28476	0.0448063	XP_004246276.1|3.9e-57|non-specific lipid-transfer protein 1 [Solanum lycopersicum]
Solyc01g108490.2	3.93	1.55	-1.28533	5.18764e-06	XP_004230807.1|4.4e-305|serine carboxypeptidase-like 26 [Solanum lycopersicum]
Solyc01g091590.2	11.97	3.053	-1.28593	0.0402272	XP_004231169.2|1.3e-104|BON1-associated protein 2 [Solanum lycopersicum]
Solyc07g006800.1	27.773	11.52	-1.28632	1.21833e-18	XP_004243014.1|1.4e-266|zeatin O-glucosyltransferase-like [Solanum lycopersicum]
Solyc01g112190.2	5.666	2.26	-1.28978	8.90979e-08	XP_004231096.1|0.0e+00|protein NLP2 [Solanum lycopersicum]
Solyc03g114350.1	8.843	3.506	-1.2948	9.19424e-07	XP_004236105.1|3.9e-166|uncharacterized protein LOC101245934 [Solanum lycopersicum]
Solyc06g068450.1	39.953	16.483	-1.29579	8.81232e-20	XP_004241680.1|2.1e-251|CBL-interacting serine/threonine-protein kinase 25 [Solanum lycopersicum]
Solyc03g043890.2	0.65	0.17	-1.3021	0.0340941	NP_001234160.2|2.9e-274|1-aminocyclopropane-1-carboxylate synthase 8 [Solanum lycopersicum]
Solyc12g019220.1	2.796	0.966	-1.30448	0.000425009	XP_019227450.1|4.7e-202|PREDICTED: polygalacturonase-like [Nicotiana attenuata]
BGI_novel_G000447	1.32	0.396	-1.30649	0.0227036
Solyc09g082240.2	4.056	1.553	-1.30726	7.0378e-05	XP_004247574.1|6.8e-114|uncharacterized protein LOC101247959 [Solanum lycopersicum]
Solyc04g076440.1	3.313	0.606	-1.3087	0.0467984	PHT84374.1|4.6e-46|hypothetical protein T459_12817 [Capsicum annuum]
Solyc01g086670.2	1.906	0.466	-1.31177	0.0351496	KDP43423.1|6.9e-08|hypothetical protein JCGZ_16710 [Jatropha curcas]
Solyc07g007800.2	2.46	0.85	-1.31502	0.00284631	XP_004242752.1|2.6e-226|heptahelical transmembrane protein 1 [Solanum lycopersicum]
Solyc08g068850.2	15.393	6.48	-1.31838	3.14452e-10	NP_001316136.1|3.7e-109|uncharacterized protein LOC101268894 isoform 1 [Solanum lycopersicum]
Solyc11g073180.1	25.363	10.146	-1.31857	4.97666e-10	XP_010313554.1|5.3e-106|uncharacterized protein LOC104644788 [Solanum lycopersicum]
Solyc03g007290.2	28.176	11.41	-1.32309	4.85587e-22	XP_004234173.1|2.5e-190|probable trehalose-phosphate phosphatase 2 [Solanum lycopersicum]
Solyc06g075780.1	7.04	2.116	-1.32462	0.0154013	XP_025887528.1|4.8e-86|LOW QUALITY PROTEIN: zinc finger protein ZAT1 [Solanum lycopersicum]
Solyc01g088360.2	0.41	0.063	-1.32526	0.0440534	XP_004229692.1|0.0e+00|amidophosphoribosyltransferase, chloroplastic-like [Solanum lycopersicum]
Solyc07g006140.2	11.723	4.69	-1.32566	3.92031e-16	XP_004242635.1|1.7e-305|cytochrome P450 CYP72A219 [Solanum lycopersicum]
Solyc02g070430.2	1.62	0.49	-1.33139	0.0118334	XP_004233129.1|1.2e-198|gibberellin 2-beta-dioxygenase 1 [Solanum lycopersicum]
Solyc09g075420.2	358.99	144.856	-1.3369	6.57894e-32	NP_001234308.2|3.3e-152|ethylene response factor 2 [Solanum lycopersicum]
Solyc03g123610.2	230.04	92.233	-1.33828	2.45292e-36	XP_016562427.1|8.2e-269|PREDICTED: alanine aminotransferase 2-like [Capsicum annuum]
Solyc05g012370.2	4.19	1.553	-1.34295	3.10107e-05	XP_004239057.1|9.4e-205|uncharacterized protein LOC101244871 [Solanum lycopersicum]
Solyc01g066910.2	155.04	61.866	-1.343	1.05597e-14	XP_004229235.1|3.4e-52|putative lipid-transfer protein DIR1 [Solanum lycopersicum]
Solyc05g009280.2	0.926	0.263	-1.34734	0.0151701	XP_004238923.1|1.0e-287|3-ketoacyl-CoA synthase 6-like [Solanum lycopersicum]
Solyc03g093540.1	11.65	3.93	-1.35054	0.00180856	XP_019068495.1|2.0e-128|ethylene-responsive transcription factor 5-like isoform X1 [Solanum lycopersicum]
Solyc07g044710.1	4.086	1.513	-1.35142	7.33081e-05	XP_004243625.1|7.6e-229|3-hydroxyisobutyryl-CoA hydrolase-like protein 5 [Solanum lycopersicum]
Solyc05g052520.2	9.003	3.476	-1.35143	1.98535e-10	XP_004239946.1|1.0e-225|putative protein phosphatase 2C 53 [Solanum lycopersicum]
Solyc11g071740.1	10.173	3.39	-1.3539	0.00252705	XP_004251211.1|9.0e-109|putative calcium-binding protein CML19 [Solanum lycopersicum]
Solyc09g082600.1	0.476	0	-1.35391	0.0281304	XP_010326690.1|4.0e-166|LOW QUALITY PROTEIN: chlorophyllase-2, chloroplastic [Solanum lycopersicum]
Solyc06g050520.1	0.643	0.053	-1.35847	0.0357099	NP_001234689.1|5.7e-176|dehydration responsive element binding 1 [Solanum lycopersicum]
Solyc04g079260.2	0.526	0.016	-1.35976	0.0298805	XP_015167565.1|4.0e-223|PREDICTED: patatin-like protein 2 isoform X1 [Solanum tuberosum]
Solyc01g104780.2	1.506	0.336	-1.36082	0.0280563	XP_004230642.1|2.1e-111|vacuolar iron transporter homolog 4-like [Solanum lycopersicum]
Solyc07g054780.1	178.153	71.813	-1.36152	1.19466e-11	XP_004243308.1|4.8e-40|uncharacterized protein LOC544070 [Solanum lycopersicum]
Solyc08g068600.2	25.673	9.783	-1.36242	7.0975e-10	XP_004245279.1|1.7e-279|histidine decarboxylase-like [Solanum lycopersicum]
Solyc05g006980.2	14.153	5.496	-1.36484	9.7394e-15	XP_004238764.1|5.9e-167|homeobox-leucine zipper protein HAT5 [Solanum lycopersicum]
Solyc04g078340.2	2.783	0.983	-1.36524	0.000161559	XP_019069222.2|2.2e-311|LOW QUALITY PROTEIN: uncharacterized protein LOC101268390 [Solanum lycopersicum]
Solyc06g053480.2	256.15	100.75	-1.36621	8.53708e-26	PHT45320.1|9.5e-219|Acyl-[acyl-carrier-protein] desaturase, chloroplastic [Capsicum baccatum]
Solyc01g067020.2	6.14	2.316	-1.36683	1.01937e-08	NP_001234580.2|0.0e+00|atypical receptor-like kinase 1 precursor [Solanum lycopersicum]
Solyc02g069960.2	13.96	5.346	-1.37228	1.69792e-11	XP_004233159.1|3.0e-183|transcription factor JUNGBRUNNEN 1-like [Solanum lycopersicum]
Solyc10g018320.1	3.223	0.963	-1.37775	0.00730464	XP_010327317.1|2.8e-113|21 kDa protein-like [Solanum lycopersicum]
Solyc10g006220.2	22.036	8.523	-1.37933	1.31616e-14	XP_004248335.1|4.5e-184|CCR4-NOT transcription complex subunit 9 [Solanum lycopersicum]
Solyc06g059880.2	29.923	11.543	-1.38457	5.3508e-20	PHU14480.1|0.0e+00|Acetolactate synthase 1, chloroplastic [Capsicum chinense]
Solyc02g089120.2	24.226	9.326	-1.38908	8.9131e-21	XP_006338345.1|9.5e-270|PREDICTED: protein COBRA-like isoform X1 [Solanum tuberosum]
Solyc02g014030.1	1.623	0.583	-1.38951	5.68101e-06	XP_019067666.1|0.0e+00|receptor-like protein kinase FERONIA [Solanum lycopersicum]
Solyc01g094160.1	3.536	1.016	-1.39086	0.00237206	XP_016557774.1|2.1e-16|PREDICTED: uncharacterized protein LOC107857373 [Capsicum annuum]
Solyc03g116100.2	3.303	1.15	-1.39157	6.9106e-05	XP_004236011.1|5.7e-194|myb-related protein 306 [Solanum lycopersicum]
Solyc07g049550.2	58.66	22.61	-1.39381	5.6056e-23	NP_001233928.1|2.4e-182|1-aminocyclopropane-1-carboxylate oxidase 4 [Solanum lycopersicum]
Solyc09g066450.1	2.946	1.023	-1.39472	6.35872e-05	XP_004247353.1|7.8e-295|protein SCARECROW-like [Solanum lycopersicum]
Solyc02g005490.2	2.496	0.753	-1.39765	0.0042895	XP_015064567.1|7.8e-23|60S acidic ribosomal protein P1-like [Solanum pennellii]
Solyc01g007040.2	4.2	1.293	-1.40446	0.00391529	XP_010315681.1|2.6e-87|LOW QUALITY PROTEIN: E3 ubiquitin-protein ligase PUB22-like [Solanum lycopersicum]
Solyc11g011880.1	64.79	24.786	-1.40772	4.02713e-31	XP_004250234.1|0.0e+00|cold-responsive protein kinase 1 [Solanum lycopersicum]
Solyc01g080010.2	34.243	12.906	-1.41707	2.22793e-20	NP_001234249.2|1.4e-251|xyloglucan-specific fungal endoglucanase inhibitor protein precursor [Solanum lycopersicum]
Solyc04g078370.2	0.43	0.066	-1.4181	0.0266761	XP_015073917.1|2.0e-291|cytochrome P450 81E8-like [Solanum pennellii]
BGI_novel_G000534	1.366	0.33	-1.42251	0.013586
Solyc01g068410.2	76.763	26.6	-1.42319	1.2151e-05	NP_001234192.1|3.4e-204|auxin efflux carrier component 5 [Solanum lycopersicum]
Solyc09g074850.2	46.426	17.396	-1.42655	1.63958e-19	XP_004247442.2|3.2e-118|glutathione S-transferase PARB [Solanum lycopersicum]
Solyc06g068550.2	1.696	0.546	-1.43015	0.000332144	XP_004241673.1|9.3e-274|aspartyl protease family protein At5g10770-like [Solanum lycopersicum]
Solyc01g110180.2	0.846	0.086	-1.43179	0.0253507	XP_025884541.1|1.4e-115|B-box zinc finger protein 20 isoform X2 [Solanum lycopersicum]
Solyc03g082520.1	6.99	1.876	-1.43356	0.00793722	PHU23543.1|1.5e-42|hypothetical protein BC332_08650 [Capsicum chinense]
Solyc07g048070.2	25.31	9.33	-1.44431	6.02466e-21	XP_004243538.1|3.7e-236|cytochrome b561 and DOMON domain-containing protein At5g47530 [Solanum lycopersicum]
Solyc02g085910.2	68.66	25.323	-1.44521	1.58981e-17	NP_001334838.1|1.1e-154|LOB domain-containing protein 40 [Solanum lycopersicum]
Solyc09g097960.2	29.146	10.593	-1.44672	9.20574e-14	XP_015088146.1|1.6e-181|auxin-induced protein PCNT115-like isoform X1 [Solanum pennellii]
Solyc01g079160.2	7.466	2.533	-1.45003	6.89983e-06	XP_004229369.1|2.3e-215|GDSL esterase/lipase LIP-4-like isoform X2 [Solanum lycopersicum]
Solyc06g068940.2	2.033	0.556	-1.45159	0.00675756	XP_004241660.1|1.4e-90|protein C2-DOMAIN ABA-RELATED 4 [Solanum lycopersicum]
Solyc04g071590.1	17.35	5.796	-1.45289	9.07311e-05	NP_001296300.1|3.9e-58|abscisic stress-ripening protein 3 [Solanum lycopersicum]
Solyc06g054600.2	16.74	5.943	-1.45482	7.81596e-10	XP_025887306.1|2.7e-59|zinc finger CCCH domain-containing protein 58 [Solanum lycopersicum]
Solyc02g076920.2	24.426	8.936	-1.46067	1.58142e-21	XP_004232970.1|1.7e-129|transcription factor bHLH30-like [Solanum lycopersicum]
Solyc11g069700.1	73.263	27.123	-1.46188	2.40921e-49	XP_015056525.1|2.1e-259|elongation factor 1-alpha-like [Solanum pennellii]
Solyc01g059980.2	3.973	1.196	-1.46723	0.000462587	NP_001234805.1|8.1e-209|glucan endo-1,3-beta-glucosidase B precursor [Solanum lycopersicum]
Solyc06g082040.1	0.933	0.266	-1.46753	9.44538e-05	XP_010323136.1|0.0e+00|uncharacterized protein LOC101245266 isoform X3 [Solanum lycopersicum]
Solyc05g050210.2	24.693	8.953	-1.47218	8.00186e-22	XP_004240088.1|7.8e-227|GDSL esterase/lipase At4g01130-like [Solanum lycopersicum]
Solyc08g005530.2	7.446	2.623	-1.47232	3.68434e-13
Solyc12g009880.1	43.92	15.853	-1.48167	1.47971e-16	XP_004251739.1|1.4e-83|uncharacterized protein LOC101264293 [Solanum lycopersicum]
Solyc11g071350.1	1.92	0.56	-1.48318	0.000881929	XP_004251423.2|1.6e-251|aluminum-activated malate transporter 2 [Solanum lycopersicum]
Solyc12g017700.1	0.316	0.046	-1.48373	0.0173485	XP_025884502.1|0.0e+00|pre-mRNA-splicing factor ATP-dependent RNA helicase DEAH1 isoform X2 [Solanum lycopersicum]
Solyc02g094000.1	16.526	5.273	-1.48812	6.10817e-05	XP_004231789.1|9.8e-78|putative calcium-binding protein CML19 [Solanum lycopersicum]
Solyc00g048510.2	13.27	4.516	-1.48922	1.4993e-07	XP_004253374.1|7.8e-94|protein PHLOEM PROTEIN 2-LIKE A9 [Solanum lycopersicum]
Solyc01g100690.2	34.346	11.83	-1.48983	1.02327e-22	XP_010313626.1|3.8e-100|uncharacterized protein LOC101252823 [Solanum lycopersicum]
Solyc07g055630.2	1.756	0.503	-1.49334	0.00100908	XP_015081746.1|1.4e-133|G-type lectin S-receptor-like serine/threonine-protein kinase SD2-5 [Solanum pennellii]
Solyc06g036130.2	2.806	0.913	-1.4935	5.5883e-06	XP_015077259.1|5.4e-291|protein DETOXIFICATION 35-like [Solanum pennellii]
Solyc07g049460.2	41.576	14.886	-1.49609	1.19117e-32	NP_001233816.2|0.0e+00|laccase precursor [Solanum lycopersicum]
Solyc04g007580.1	11.9	3.143	-1.50185	0.00286499	XP_004237025.1|2.5e-85|uncharacterized protein LOC101267223 [Solanum lycopersicum]
Solyc07g005630.2	7.803	2.146	-1.50332	0.00190218	XP_019256543.1|1.9e-09|PREDICTED: defensin-like protein 1 [Nicotiana attenuata]
Solyc02g067440.2	338.18	120.57	-1.50917	1.69084e-32	XP_004233351.1|6.6e-156|plant cysteine oxidase 2 [Solanum lycopersicum]
Solyc01g107080.2	16.846	5.586	-1.51153	4.93331e-17	XP_004230696.1|3.0e-278|uncharacterized acetyltransferase At3g50280 [Solanum lycopersicum]
Solyc05g052280.2	68.67	24.54	-1.51277	7.2733e-57	XP_004239964.1|4.8e-181|peroxidase P7 [Solanum lycopersicum]
Solyc07g006420.1	19.033	6.623	-1.51308	5.5876e-16	XP_025887640.1|2.1e-162|uncharacterized protein LOC112941801 [Solanum lycopersicum]
Solyc05g005170.2	49.696	15.696	-1.53229	3.49287e-06	XP_004238649.1|5.1e-309|polygalacturonase At1g48100-like [Solanum lycopersicum]
Solyc10g076210.1	115.123	40.25	-1.53852	4.62186e-40	XP_004249054.1|6.9e-180|peroxidase 70-like [Solanum lycopersicum]
Solyc01g096510.2	6.356	1.716	-1.54332	0.00087313	XP_004230035.1|1.8e-82|sigma factor binding protein 1, chloroplastic [Solanum lycopersicum]
Solyc07g007420.2	1.8	0.356	-1.54566	0.00809517	XP_010323274.1|4.5e-108|F-box/LRR-repeat protein 14-like isoform X3 [Solanum lycopersicum]
Solyc04g081840.2	1.98	0.526	-1.54882	0.000899975	XP_004238625.1|4.7e-186|UPF0496 protein At1g20180-like [Solanum lycopersicum]
Solyc01g088830.2	8.98	3.016	-1.5571	6.27826e-17	XP_025887310.1|5.3e-256|ankyrin repeat-containing protein BDA1-like [Solanum lycopersicum]
Solyc01g107100.2	233.803	80.88	-1.55803	2.0875e-31	XP_016539429.1|3.1e-38|PREDICTED: uncharacterized protein LOC107840181 [Capsicum annuum]
Solyc10g083400.1	16.563	5.59	-1.5644	1.58138e-20	XP_004249445.1|1.6e-292|cytochrome P450 94C1-like [Solanum lycopersicum]
Solyc04g054500.2	106.363	36.196	-1.57361	5.3609e-34	NP_001308204.1|1.3e-82|metal ion binding protein [Solanum lycopersicum]
Solyc03g117860.2	3.386	0.89	-1.58563	0.000483567	XP_004235872.1|1.1e-99|probable E3 ubiquitin-protein ligase RNF217 [Solanum lycopersicum]
Solyc08g065540.2	1.066	0.16	-1.59163	0.00804753	XP_004245372.1|4.6e-190|probable protein phosphatase 2C 72 [Solanum lycopersicum]
Solyc02g093910.2	33.963	11.33	-1.59289	1.55018e-27	PHU27893.1|8.1e-221|Kelch repeat-containing protein [Capsicum chinense]
Solyc01g107090.2	99.393	33.453	-1.59467	4.31343e-36	XP_010315179.1|1.1e-60|uncharacterized protein LOC104645408 [Solanum lycopersicum]
Solyc08g068610.2	7.043	2.17	-1.60933	8.6086e-09	NP_001233852.2|4.0e-279|aromatic amino acid decarboxylase 1B [Solanum lycopersicum]
Solyc12g010920.1	1.19	0	-1.61205	0.00722056	XP_004251808.1|1.2e-88|oleosin 5-like [Solanum lycopersicum]
Solyc03g025780.2	0.366	0.013	-1.61559	0.00809446	PHU23018.1|1.1e-265|hypothetical protein BC332_08125 [Capsicum chinense]
Solyc12g008470.1	34.92	11.423	-1.61945	1.55965e-23	XP_015059785.1|8.3e-40|cytochrome B5-like protein [Solanum pennellii]
Solyc03g113130.2	54.726	17.966	-1.62243	3.60339e-34	XP_004236196.1|1.3e-167|plant cysteine oxidase 2 isoform X1 [Solanum lycopersicum]
Solyc01g081280.2	3.843	1.266	-1.62678	4.99519e-10	XP_025884734.1|5.2e-27|uncharacterized protein LOC112940687 [Solanum lycopersicum]
Solyc12g005380.1	2.82	0.78	-1.63821	1.40132e-05	XP_019066875.2|7.2e-301|diacylglycerol kinase 5-like [Solanum lycopersicum]
Solyc09g008270.2	1.273	0.21	-1.63999	0.00445122	XP_004246621.1|7.7e-142|uncharacterized protein LOC101260668 [Solanum lycopersicum]
Solyc12g056180.1	0.57	0.046	-1.644	0.00707633	XP_006360739.1|1.4e-261|PREDICTED: 1-aminocyclopropane-1-carboxylate synthase-like [Solanum tuberosum]
Solyc08g079980.1	9.856	2.97	-1.64717	4.97301e-10	XP_019070598.1|0.0e+00|subtilisin-like protease SBT1.7 [Solanum lycopersicum]
Solyc02g077240.2	349.213	104.476	-1.6472	5.42141e-09	XP_009801931.1|0.0e+00|PREDICTED: pyruvate decarboxylase 1 isoform X1 [Nicotiana sylvestris]
Solyc10g047810.1	5.946	1.85	-1.64939	4.92934e-16	NP_001307719.1|0.0e+00|L-type lectin-domain containing receptor kinase IX.1-like precursor [Solanum lycopersicum]
Solyc07g043580.2	4.846	1.386	-1.65144	3.27675e-08	NP_001294937.1|4.2e-295|transcription factor PIF4 [Solanum lycopersicum]
Solyc12g056090.1	11.633	1.746	-1.66599	0.00457842	PHT65995.1|9.0e-24|hypothetical protein T459_30420 [Capsicum annuum]
Solyc08g077060.2	24.433	7.573	-1.66767	1.16367e-27	XP_004245885.1|1.1e-82|protein LOL1 isoform X2 [Solanum lycopersicum]
Solyc09g075540.1	33.726	10.706	-1.67096	1.77029e-46	XP_004247532.2|0.0e+00|COBRA-like protein 7 [Solanum lycopersicum]
Solyc01g107820.2	22.073	6.906	-1.68815	1.44315e-40	NP_001315561.1|1.7e-275|scopoletin glucosyltransferase [Solanum lycopersicum]
Solyc06g082440.1	50.616	15.956	-1.68869	1.4499e-56	NP_001265893.1|5.4e-241|CBL-interacting protein kinase 11 [Solanum lycopersicum]
Solyc04g014520.1	27.386	8.373	-1.69561	1.04986e-19	XP_004237134.1|1.3e-172|transmembrane protein 45B-like [Solanum lycopersicum]
Solyc06g072210.1	1.233	0	-1.70235	0.00411129	XP_004242148.1|1.7e-109|miraculin-like [Solanum lycopersicum]
Solyc09g090680.2	22.276	16.896	-1.71071	1.55322e-20	XP_019071185.1|1.6e-190|cysteine-rich repeat secretory protein 3-like [Solanum lycopersicum]
Solyc05g009320.2	18.946	5.613	-1.71586	1.47047e-14	XP_004238927.1|7.3e-144|LOB domain-containing protein 42 [Solanum lycopersicum]
Solyc06g084170.2	5.18	0.97	-1.71968	0.00123676	XP_015078086.1|1.7e-42|uncharacterized protein LOC107021881 [Solanum pennellii]
Solyc06g062600.2	1.88	0.476	-1.73258	5.14571e-06	XP_016578580.1|5.0e-308|PREDICTED: protein HOTHEAD-like isoform X2 [Capsicum annuum]
Solyc08g074870.1	0.97	0.113	-1.73261	0.00325817	XP_010325699.2|3.1e-241|uncharacterized protein LOC101250537 [Solanum lycopersicum]
Solyc09g082250.2	3.343	0.716	-1.73714	0.000448865	XP_015086775.1|2.0e-82|uncharacterized protein LOC107029840 [Solanum pennellii]
Solyc03g111880.2	65.246	19.84	-1.73934	1.11439e-70	XP_025885829.1|2.8e-304|cytochrome P450 71A22-like [Solanum lycopersicum]
Solyc03g033330.2	126.48	39.243	-1.74069	2.20018e-45	XP_004234521.1|3.6e-134|NEP1-interacting protein-like 1 [Solanum lycopersicum]
Solyc05g021090.2	2.3	0.52	-1.74468	0.000110113	XP_019069297.1|4.8e-166|transcription factor JUNGBRUNNEN 1-like isoform X1 [Solanum lycopersicum]
Solyc01g090760.2	157.236	46.776	-1.75949	6.27478e-36	XP_004229778.1|2.3e-152|GATA transcription factor 4 [Solanum lycopersicum]
Solyc04g006970.2	40.33	11.803	-1.76444	9.32493e-28	XP_004236950.1|0.0e+00|phosphoenolpyruvate carboxylase 4 [Solanum lycopersicum]
Solyc01g068550.2	2.893	0.713	-1.7667	7.15805e-06	XP_004229155.1|1.0e-203|myricetin O-methyltransferase-like isoform X1 [Solanum lycopersicum]
Solyc06g054620.2	56.373	16.953	-1.76992	6.89515e-23	XP_004241158.2|5.9e-234|zinc finger CCCH domain-containing protein 5-like isoform X1 [Solanum lycopersicum]
Solyc09g008830.2	161.31	47.243	-1.77324	3.03872e-26	XP_010325945.1|1.4e-83|chromatin-remodeling ATPase INO80 [Solanum lycopersicum]
Solyc01g079880.2	507.51	150.73	-1.775	6.33403e-60	XP_004229428.1|2.3e-129|stem-specific protein TSJT1 [Solanum lycopersicum]
Solyc07g007410.2	19.66	5.666	-1.77635	1.00726e-37	XP_004242726.1|7.3e-158|LRR receptor-like serine/threonine-protein kinase isoform X1 [Solanum lycopersicum]
Solyc06g007390.2	36.7	10.646	-1.77792	1.57411e-22	XP_004240624.1|1.1e-132|LOB domain-containing protein 15-like [Solanum lycopersicum]
BGI_novel_G000417	4.896	1.15	-1.78279	1.24997e-05
Solyc06g059740.2	3845.29	1037.61	-1.79528	2.34306e-11	NP_001234099.1|2.5e-208|alcohol dehydrogenase 2 [Solanum lycopersicum]
Solyc05g025890.1	14.706	4.256	-1.79716	7.42336e-18	XP_004239318.1|2.0e-159|uncharacterized protein LOC101263025 [Solanum lycopersicum]
Solyc08g008020.1	30.863	8.953	-1.79877	4.7726e-52	XP_004244612.1|0.0e+00|FT-interacting protein 1 [Solanum lycopersicum]
Solyc03g120260.2	9.433	2.496	-1.80689	8.53399e-11	XP_004235705.1|1.3e-177|coatomer subunit beta'-2 isoform X2 [Solanum lycopersicum]
Solyc01g104800.2	76.426	21.996	-1.81711	1.98985e-54	XP_004230639.1|3.7e-108|vacuolar iron transporter homolog 4 [Solanum lycopersicum]
Solyc03g031630.2	1.423	0	-1.81977	0.00191949	XP_004234473.1|1.6e-70|uncharacterized protein LOC101252752 [Solanum lycopersicum]
Solyc10g084880.2	6.99	1.793	-1.83245	3.01549e-10	NP_001234706.2|4.1e-268|uncharacterized protein LOC100134881 [Solanum lycopersicum]
Solyc02g092290.2	34.38	9.573	-1.83499	1.37925e-28	XP_004231931.1|0.0e+00|putative F-box protein At1g49610 [Solanum lycopersicum]
Solyc01g109100.2	16.72	4.276	-1.8369	3.13045e-09	XP_009793543.1|6.6e-25|PREDICTED: uncharacterized protein LOC104240402 [Nicotiana sylvestris]
Solyc08g078700.2	35.423	9.856	-1.83756	1.2041e-27	NP_001233872.1|3.4e-113|mitochondrial small heat shock protein [Solanum lycopersicum]
Solyc07g032740.2	661.22	186.47	-1.83813	1.05703e-47	NP_001308263.1|7.3e-195|aspartate aminotransferase, cytoplasmic [Solanum lycopersicum]
Solyc10g075170.1	13.38	3.573	-1.84423	4.05556e-17	PHU04831.1|1.0e-179|Aspartate aminotransferase, mitochondrial [Capsicum chinense]
BGI_novel_G000195	3.856	0.78	-1.85451	4.41008e-05
Solyc01g109390.2	805.593	224.126	-1.85658	1.35269e-38	XP_004230985.1|5.0e-53|putative lipid-transfer protein DIR1 [Solanum lycopersicum]
Solyc10g011730.2	50.823	13.696	-1.85682	7.69959e-17	XP_025883499.1|2.7e-31|arabinogalactan protein 20-like [Solanum lycopersicum]
Solyc04g071600.2	58.303	16.013	-1.8705	7.59744e-34	XP_004237807.1|1.9e-58|abscisic stress-ripening protein 3-like [Solanum lycopersicum]
Solyc03g116160.1	2.913	0.576	-1.87541	7.06402e-05	XP_004236010.1|8.6e-261|protein PHYTOCHROME KINASE SUBSTRATE 3 [Solanum lycopersicum]
Solyc07g054770.1	10.643	1.473	-1.87753	0.000568901	XP_010323709.1|2.6e-44|uncharacterized protein LOC101254505 [Solanum lycopersicum]
Solyc12g005030.1	43.91	11.85	-1.8816	1.3156e-28	XP_015061184.1|2.9e-190|calcium-dependent protein kinase 2-like isoform X1 [Solanum pennellii]
Solyc02g071560.2	173.666	47.516	-1.88426	5.16472e-68	XP_004232982.1|0.0e+00|subtilisin-like protease SBT5.6 [Solanum lycopersicum]
Solyc03g042560.1	3.146	0.683	-1.8909	1.45563e-06	P35511.1|4.6e-257|RecName: Full=Phenylalanine ammonia-lyase; Short=PAL
Solyc01g094170.2	56.513	14.88	-1.90475	3.23611e-35	XP_004229919.1|2.8e-271|digalactosyldiacylglycerol synthase 2, chloroplastic [Solanum lycopersicum]
Solyc11g020320.1	1.34	0.113	-1.91092	0.00084558	XP_019066449.1|5.3e-160|MADS-box protein SOC1-like [Solanum lycopersicum]
Solyc07g054810.1	11.086	0.3	-1.91516	0.00103305	PHU24579.1|2.2e-21|hypothetical protein BC332_09686 [Capsicum chinense]
Solyc07g054800.1	5.873	0.18	-1.93348	0.000901904	XP_004243307.1|1.7e-40|uncharacterized protein LOC101253915 [Solanum lycopersicum]
Solyc10g076370.1	0.95	0.093	-1.93564	0.000581821	XP_010327719.1|2.3e-236|dehydration-responsive element-binding protein 2A [Solanum lycopersicum]
Solyc12g009300.1	255.833	66.26	-1.9449	3.37835e-57	XP_006345244.1|0.0e+00|PREDICTED: sucrose synthase isoform X1 [Solanum tuberosum]
Solyc03g036470.1	2.713	0.333	-1.95215	0.000324819	XP_015069807.1|2.9e-119|phenylalanine ammonia-lyase [Solanum pennellii]
Solyc06g083590.2	6.006	1.463	-1.95748	3.57445e-16	XP_010323011.1|0.0e+00|ABI3 protein isoform X1 [Solanum lycopersicum]
Solyc08g005960.1	210.083	53.866	-1.97135	4.20144e-31	XP_004244453.1|1.3e-74|14 kDa proline-rich protein DC2.15-like [Solanum lycopersicum]
Solyc07g056190.2	5.283	0.893	-1.99866	1.49747e-05	XP_004243216.1|3.8e-64|heavy metal-associated isoprenylated plant protein 39-like [Solanum lycopersicum]
Solyc08g062340.2	5.19	1.043	-2.01833	6.10644e-08	NP_001234130.2|2.0e-81|cytosolic class II small heat shock protein HCT2 [Solanum lycopersicum]
Solyc07g009310.2	154.256	37.32	-2.02869	2.68186e-26	PHU09477.1|1.7e-29|hypothetical protein BC332_21337 [Capsicum chinense]
Solyc01g104740.2	31.32	7.54	-2.03632	1.57765e-31	NP_001234468.2|3.6e-74|ethylene-responsive transcriptional coactivator [Solanum lycopersicum]
Solyc01g102900.2	542.573	132.96	-2.04134	3.82858e-69	XP_004230404.1|6.5e-128|putative germin-like protein 2-1 [Solanum lycopersicum]
Solyc08g066100.2	0.46	0.013	-2.05457	0.000339011	XP_004245136.1|8.9e-293|ATP-dependent 6-phosphofructokinase 6 [Solanum lycopersicum]
Solyc06g071990.2	122.896	29.376	-2.0587	1.68297e-40	XP_004241530.1|1.8e-145|uncharacterized protein LOC101264018 [Solanum lycopersicum]
Solyc01g100370.2	497.663	105.13	-2.07202	7.03775e-12	NP_001294878.1|2.7e-88|universal stress protein A-like protein isoform 2 [Solanum lycopersicum]
Solyc02g078380.2	104.023	23.966	-2.09881	2.38914e-34	XP_004232863.1|2.0e-145|stem-specific protein TSJT1 [Solanum lycopersicum]
Solyc07g032730.2	4.723	0.943	-2.10237	1.7742e-10	XP_010323589.1|1.3e-233|rho guanine nucleotide exchange factor 8-like [Solanum lycopersicum]
Solyc04g081960.1	17.563	3.636	-2.16956	9.82495e-18	XP_004238391.1|2.2e-135|uncharacterized protein At1g76070 [Solanum lycopersicum]
Solyc01g005040.2	2.473	0.223	-2.17052	4.25564e-05	XP_004228943.1|9.1e-94|CASP-like protein PIMP1 [Solanum lycopersicum]
Solyc12g009650.1	172.536	38.213	-2.17818	2.88778e-41	NP_001307023.1|5.4e-154|proline-rich protein precursor [Solanum lycopersicum]
Solyc06g084070.2	83.703	18.496	-2.18258	2.10511e-51	NP_001266042.1|6.3e-87|auxin-responsive protein IAA2 [Solanum lycopersicum]
Solyc09g005110.2	1.293	0.183	-2.1835	1.04667e-06	XP_004246778.1|0.0e+00|pyruvate decarboxylase 1 [Solanum lycopersicum]
Solyc00g050430.2	296.163	65.386	-2.18377	1.04136e-59	NP_001316504.1|1.1e-197|NO FLOWERING IN SHORT DAY-like transcription factor [Solanum lycopersicum]
Solyc01g106510.2	24.223	5.246	-2.19229	6.83679e-45	XP_004230661.1|2.6e-234|uncharacterized protein LOC101255341 [Solanum lycopersicum]
Solyc01g099620.2	157.96	34.51	-2.19891	1.34728e-58	XP_004230232.1|0.0e+00|respiratory burst oxidase homolog protein B [Solanum lycopersicum]
Solyc06g072940.1	2.703	0.396	-2.20359	7.04713e-10	XP_019070141.1|8.8e-178|VAN3-binding protein-like isoform X2 [Solanum lycopersicum]
BGI_novel_G000427	7.133	1.1	-2.24884	2.87025e-08
Solyc10g050980.1	10.963	0	-2.25127	6.0757e-05	PHT57549.1|1.2e-06|hypothetical protein T459_35480 [Capsicum annuum]
Solyc04g025530.2	16.48	3.17	-2.26431	2.9522e-19	XP_019258514.1|2.1e-270|PREDICTED: glutamate decarboxylase 4 [Nicotiana attenuata]
Solyc10g075160.1	8.766	1.233	-2.27065	1.7219e-07	XP_004249046.2|6.5e-77|ferredoxin [Solanum lycopersicum]
Solyc02g090120.1	1187.68	228.183	-2.27362	1.44788e-15	XP_009789527.1|1.3e-19|PREDICTED: uncharacterized protein LOC104237137 [Nicotiana sylvestris]
Solyc02g080830.1	8.22	1.513	-2.27544	3.73551e-16	XP_004233789.1|5.0e-231|probable F-box protein At4g22030 [Solanum lycopersicum]
Solyc01g110800.2	3.11	0.21	-2.28295	3.4628e-05	XP_004230981.1|1.3e-41|auxin-induced protein 15A-like [Solanum lycopersicum]
Solyc12g098210.1	0.48	0.05	-2.29124	1.98444e-06	XP_006349934.1|0.0e+00|PREDICTED: pleiotropic drug resistance protein 1-like [Solanum tuberosum]
Solyc10g076510.1	481.46	83.31	-2.29643	8.7328e-13	XP_004249069.1|0.0e+00|pyruvate decarboxylase 1-like [Solanum lycopersicum]
Solyc07g054790.1	11.983	1.193	-2.30422	4.16525e-06	XP_004243306.1|2.3e-43|uncharacterized protein LOC101253603 [Solanum lycopersicum]
Solyc08g078890.1	6.363	1.026	-2.33376	1.17098e-11	XP_004245751.1|6.5e-185|36.4 kDa proline-rich protein [Solanum lycopersicum]
Solyc11g072140.1	11.033	2.113	-2.34985	9.41735e-45	XP_004251441.2|0.0e+00|wall-associated receptor kinase 3-like [Solanum lycopersicum]
Solyc05g053860.2	34.553	6.553	-2.36079	1.87796e-39	XP_004239844.1|8.5e-276|organic cation/carnitine transporter 3 [Solanum lycopersicum]
Solyc04g008230.2	26.54	4.976	-2.38642	3.83117e-48	XP_004236918.1|5.8e-294|polygalacturonase At1g48100 [Solanum lycopersicum]
Solyc07g063640.1	90.336	15.483	-2.42089	1.10886e-17	XP_006360122.1|2.5e-43|PREDICTED: uncharacterized protein LOC102583467 [Solanum tuberosum]
Solyc02g077790.1	34.19	3.213	-2.43223	7.37496e-07	XP_015161339.1|1.4e-11|PREDICTED: ethylene-responsive transcription factor 4-like, partial [Solanum tuberosum]
Solyc11g006730.1	32.9	5.48	-2.4433	1.18965e-20	XP_010312518.1|6.2e-113|putative germin-like protein 9-2 [Solanum lycopersicum]
Solyc08g083050.1	153.533	20.396	-2.46197	3.49106e-10	XP_004245463.1|3.2e-137|uncharacterized protein At1g01500 [Solanum lycopersicum]
Solyc03g114360.2	46.673	7.183	-2.48211	1.59922e-16	XP_004236104.1|5.2e-218|probable inactive poly [ADP-ribose] polymerase SRO5 isoform X2 [Solanum lycopersicum]
Solyc08g078850.2	56.963	9.91	-2.48711	1.25732e-46	NP_001266265.1|8.3e-193|L-lactate dehydrogenase [Solanum lycopersicum]
Solyc05g009580.2	10.656	1.743	-2.50438	2.56663e-27	XP_019069442.2|0.0e+00|aluminum-activated malate transporter 9-like [Solanum lycopersicum]
Solyc01g104810.2	158.056	28.24	-2.50546	2.13676e-143	XP_004230629.1|8.1e-114|vacuolar iron transporter homolog 4 [Solanum lycopersicum]
Solyc07g042100.2	27.186	4.543	-2.53912	1.31287e-45	XP_010323988.1|3.9e-146|uncharacterized protein LOC101261934 isoform X1 [Solanum lycopersicum]
Solyc01g104820.2	214.046	37.263	-2.5476	8.92547e-166	XP_004230638.1|1.2e-115|vacuolar iron transporter homolog 4-like [Solanum lycopersicum]
Solyc06g074170.2	11.843	1.813	-2.56321	9.09139e-24	XP_004241333.1|4.4e-237|NAC domain-containing protein 40-like [Solanum lycopersicum]
Solyc01g106130.1	4.403	0.576	-2.56602	8.08062e-13	XP_004231368.1|1.8e-227|uncharacterized protein LOC101247870 [Solanum lycopersicum]
Solyc05g047530.2	74.89	10.786	-2.57808	1.73695e-18	XP_004240122.1|1.3e-310|cytochrome P450 CYP73A100 [Solanum lycopersicum]
Solyc08g075600.1	4.6	0.713	-2.60643	7.77558e-33	XP_016573661.1|0.0e+00|PREDICTED: probable LRR receptor-like serine/threonine-protein kinase At3g47570 [Capsicum annuum]
Solyc08g006470.2	11.16	1.676	-2.60761	9.80413e-34	XP_004244493.1|1.8e-185|cytoplasmic 60S subunit biogenesis factor REI1 homolog 1 [Solanum lycopersicum]
Solyc03g121900.1	137.793	21.883	-2.61095	1.93353e-36	XP_025886016.1|4.7e-56|putative lipid-transfer protein DIR1 [Solanum lycopersicum]
Solyc07g041500.2	3.85	0.5	-2.62275	2.05773e-15	XP_004243719.1|2.2e-304|cytochrome P450 72A15 [Solanum lycopersicum]
Solyc07g026650.2	923.753	131.276	-2.62781	2.53892e-21	NP_001234037.1|1.7e-175|1-aminocyclopropane-1-carboxylate oxidase [Solanum lycopersicum]
Solyc01g101050.2	51.39	8.05	-2.63126	1.41188e-53	XP_004231304.1|4.5e-185|peroxidase 5-like [Solanum lycopersicum]
Solyc12g006680.1	360.58	25.65	-2.65015	8.73906e-08	NP_001316350.1|5.1e-46|early nodulin-93-like [Solanum lycopersicum]
Solyc07g065970.1	41.186	5.603	-2.7117	7.41274e-24	XP_010324234.1|2.2e-89|chaperone protein dnaJ 11, chloroplastic [Solanum lycopersicum]
Solyc11g005830.1	0.77	0.013	-2.74045	1.85709e-07	XP_004250451.1|0.0e+00|uncharacterized protein LOC101263966 [Solanum lycopersicum]
Solyc11g008680.1	207.29	23.886	-2.74585	1.25671e-15	XP_009626531.1|8.8e-201|PREDICTED: stearoyl-[acyl-carrier-protein] 9-desaturase, chloroplastic [Nicotiana tomentosiformis]
Solyc06g010010.1	1.84	0.156	-2.76514	9.91159e-11	AOL57988.1|1.6e-276|MLO16 [Solanum lycopersicum]
Solyc06g069150.1	35.366	4.62	-2.7675	7.39913e-27	XP_019069696.1|2.5e-137|uncharacterized protein LOC109120423 [Solanum lycopersicum]
Solyc01g106140.1	4.36	0.483	-2.76857	2.95881e-15	XP_004231368.1|1.2e-179|uncharacterized protein LOC101247870 [Solanum lycopersicum]
Solyc09g011270.2	11.44	1.4	-2.90183	1.82794e-24	XP_019071040.1|2.1e-112|uncharacterized protein LOC101250920 [Solanum lycopersicum]
Solyc04g077620.1	60.903	7.366	-2.91949	2.64562e-33	XP_010320524.1|2.3e-62|uncharacterized protein LOC104647238 [Solanum lycopersicum]
Solyc07g045030.2	8.55	0.956	-2.95247	2.9117e-29	XP_010323924.2|3.8e-197|transcription factor JUNGBRUNNEN 1-like isoform X1 [Solanum lycopersicum]
Solyc07g061720.2	20.416	1.373	-3.04343	1.27033e-12	NP_001234752.1|1.8e-188|gibberellin 2-oxidase [Solanum lycopersicum]
Solyc02g078110.1	46.073	3.776	-3.04426	1.76815e-15	PHT90434.1|3.5e-18|Pistil-specific extensin-like protein [Capsicum annuum]
Solyc04g071580.2	165.323	19.546	-3.08701	1.67514e-145	NP_001307920.1|3.5e-64|abscisic stress-ripening protein 2 [Solanum lycopersicum]
Solyc10g076190.1	37.586	4.03	-3.13748	4.98523e-62	XP_004249044.1|6.3e-181|peroxidase 2-like [Solanum lycopersicum]
Solyc12g088130.1	54.226	5.523	-3.20532	5.57744e-61	XP_004252727.1|6.4e-192|transcription factor bHLH93-like [Solanum lycopersicum]
Solyc01g090980.1	5.566	0.14	-3.28314	4.39578e-12	PHU12463.1|1.4e-50|hypothetical protein BC332_19393 [Capsicum chinense]
Solyc06g072000.1	1.23	0.033	-3.58167	5.5876e-16	XP_025887117.1|0.0e+00|uncharacterized protein LOC101252297 [Solanum lycopersicum]
Solyc06g076400.2	3.4	0.093	-3.79821	7.74513e-20	XP_004241211.1|3.9e-240|probable protein phosphatase 2C 24 [Solanum lycopersicum]
Solyc12g005020.1	16.443	0.716	-3.92822	1.91961e-32	XP_004251461.1|3.4e-125|NEP1-interacting protein-like 1 isoform X1 [Solanum lycopersicum]
Solyc10g050990.1	241.79	8.626	-3.94927	5.06432e-24	PHT57549.1|2.4e-08|hypothetical protein T459_35480 [Capsicum annuum]
Solyc01g102890.2	789.743	50.766	-3.95905	0	XP_004230403.1|6.7e-128|putative germin-like protein 2-1 [Solanum lycopersicum]
Solyc04g011340.2	78.21	1.716	-4.21412	1.46436e-23	XP_004236759.1|4.2e-213|WAT1-related protein At2g39510 [Solanum lycopersicum]
Solyc12g006560.1	73.97	0.496	-4.35805	1.81112e-20	XP_004251567.1|4.0e-37|early nodulin-93-like [Solanum lycopersicum]
Solyc01g102910.2	1545.64	61.17	-4.651	0	XP_004230405.1|1.6e-128|germin-like protein subfamily 1 member 14 [Solanum lycopersicum]
Solyc02g089140.2	87.76	0.46	-5.0451	1.32231e-30	XP_004232140.1|6.8e-45|uncharacterized protein LOC101252543 [Solanum lycopersicum]
Solyc06g050870.2	206.36	4.82	-5.15766	5.04793e-114	OIT31057.1|2.6e-29|hypothetical protein A4A49_31095 [Nicotiana attenuata]
