# Supplementary material for: Comparative Physiological and Transcriptomic Analyses Reveal Altered Fe-Deficiency Responses in Tomato Epimutant Colorless Non-ripening
Source: Front Plant Sci. 2022 Jan 21;12:796893. doi: 10.3389/fpls.2021.796893 (PMC8813752; doi:10.3389/fpls.2021.796893)
Supplement: Supplementary file 15 [file Table_9.xlsx]

## Sheet: Table S8
Table S9. Identification of known Fe homeostasis gene homologs in tomato.
Arabidopsis gene	TAIR ID	Role in Fe defeiciency response	Homologs in tomato	Gene name in tomatoa	FPKM value		Log2FC
					+Fe	-Fe
Transcription factors
bHLH34	AT3G23210	subgroup IVc bHLH TFs; regulating subgroup Ib bHLH TFs	Solyc09g089870.2	SlbHLH104	32.517	27.923	-0.192
bHLH104	AT4G14410
ILR3	AT5G54680		Solyc07g064040.2	SlbHLH143	169.427	175.67	0.077
			Solyc07g052670.2	SlILR3	360.47	957.686	1.43941
bHLH115	AT1G51070		Solyc10g006510.2	SlbHLH115	36.657	38.457	0.093
bHLH38	AT3G56970	subgroup Ib bHLH TFs, interacting with FIT	Solyc10g079650.1	SlbHLH066	1.33	25.29	3.862
bHLH101	AT5G04150
bHLH39	AT3G56980		Solyc10g079680.1	SlbHLH067	0.137	18.193	4.718
bHLH100	AT2G41240		Solyc10g079660.1	SlbHLH068	0.097	46.653	6.748
FIT	AT2G28160	Central regulator	Solyc06g051550.2	SlbHLH085/SlFER	50.456	160.043	1.67712
bHLH121(URI)	AT3G19860	Interacting with subgroup Ivc TFs	Solyc01g111130.2	SlbHLH011/SlURI	21.933	18.85	-0.196
PYE	AT3G47640	regulating negatively genes invovled in internal Fe moblization	Solyc03g116340.2	SlbHLH025/SlPYE	22.627	41.42	0.902
MYB10	AT3G12820	regulating coumarin biosynthesis and secretion	Solyc10g005550.1	SlMYB10	0.1	28.93	5.683
MYB72	AT1G56160
Transporters
IRT1	AT4G19690	Fe uptake	Solyc02g069200.1	LeIRT1	2.327	539.317	6.73
IRT2	AT4G19680		Solyc02g069190.2	LeIRT2	41.95	624.703	3.711
NRAMP1	AT1G80830		Solyc11g018530.1	SlNRAMP1	17.973	620.27	5.072
AHA2	AT4G30190	Fe solubilization	Solyc07g017780.2	SlAHA2/LHA1	722.907	849.12	0.262
NRAMP3	AT2G23150	Internal Fe mobilization	Solyc02g092800.2	SlNRAMP3	35.283	121.717	1.796
NRAMP4	AT5G67330		Solyc04g078250.2	SlNRAMP4	20.3	16.9	-0.236
FRD3	AT3G08040	Citrate efflux; Fe translocation from roots to shoots	Solyc01g087150.2	SlFRD3	17.35	30.49	0.852
YSL1	AT4G24120	londing Fe into seeds	Solyc02g094280.2	SlYSL1	53.55	56.673	0.107
YSL2	AT5G24380		Solyc08g083060.2	SlYSL2	22.473	17.717	-0.314
YSL3	AT5G53550	londing Fe into seeds	Solyc03g082620.2	SlYSL3	7.46	3.623	-0.978
FPN1/IREG1	AT2G38460	Fe distribution	Solyc10g076280.1	SlFPN1	7.443	9.52	0.358
ZIF1	AT5G13740		Solyc01g096720.2	SlZIF1	0	0.303	1.256
OPT3	AT4G16370		Solyc11g012700.1	SlOPT3	5.65	33.78	2.536
VIT1	AT2G01770	Sequestration into vacuoles	Solyc04g008060.2	SlVIT	10.113	9.317	-0.089
VTL5	AT1G76800		Solyc01g104820.2	SlVTL5	163.863	79.1	-0.901
VTL1	AT1G21140		Solyc01g104810.2	SlVTL1	13.756	4.44	-1.17427
PDR9/ABCG37	AT3G53480	Coumarin secretion	Solyc01g101070.2	SlABCG37	24.947	81.503	1.719
Fe storage
FER1	AT5G01600	Sequestration into ferritin	Solyc05g052470.2	SlFER1	45.52	31.353	-0.505
FER4	AT2G40300		Solyc06g050980.2	SlFER3	66.113	31.873	-1.008
FER3	AT3G56090
Coumarin biosynthesis
F6'H1	AT3G13610	Coumarin biosynthesis	Solyc11g072100.1	SlF6'H1	5.55	5.663	0.051
CYP82C4	AT4G31940		Solyc09g059240.2	SlCYP82C4-1	0.633	0.383	-0.495
			Solyc12g088970.1	SlCYP82C4-2	0.533	456.83	2.237
BGLU42	AT5G36890		Solyc11g008720.1	SlBGLU42	4.783	5.477	0.21
Others
NAS4	AT1G56430	Fe translocation	Solyc01g100490.2	CHLN	190.737	471.523	1.322
BTSL1	AT1G74770	E3 ligase; degrading subgroup Ivc TFs	Solyc03g113350.2	SlBTSL1	59.337	159.05	1.439
BTSL2	AT1G18910
BTS	AT3G18290		Solyc05g009150.2	SlBTS	12.003	15.75	0.411
SlNR	AT1G77760	Nitrate reductase; Fe deficiency induced nitric oxide production	Solyc11g013810.1	SlNR	249.56	130.64	-0.901223
	AT1G37130
FRO2	AT1G01580	Fe reduction	Solyc01g094910.2	LeFRO2	0.83	545.98	3.52526
